# Supplementary material for: Mesenchyme instructs growth while epithelium directs branching in the mouse mammary gland
Source: eLife. 2024 Mar 5;13:e93326. doi: 10.7554/eLife.93326 (PMC10959526; doi:10.7554/eLife.93326)
Supplement: Figure 1—figure supplement 1—source data 1. [file elife-93326-fig1-figsupp1-data1.xlsx]

## Sheet: Figure 1 - Figure supplement 1E
Cleaved Caspase3+ cells (%)	E14.5	E16.5
	1.94175	1.05642
	0.218579	0.99098
	0.790514	0.756056
	5.41488	2.53241
	9.63572	0.796489
	1.07422	1.04526
	6.51316	1.12072
	25.7699	3.56725
	2.05628	0.946674
	24.8649	1.2987
	1.14108	0.847896
	12.4549	1.6738
	0.644468	1.0854
	31.4667	0.796922
	29.0055	0.642815
	8.11518	0.376562
	6.04027	0.261188
		1.42933
		0.558338
