# Supplementary material for: Mesenchyme instructs growth while epithelium directs branching in the mouse mammary gland
Source: eLife. 2024 Mar 5;13:e93326. doi: 10.7554/eLife.93326 (PMC10959526; doi:10.7554/eLife.93326)
Supplement: Figure 1—source data 1. [file elife-93326-fig1-data1.xlsx]

## Sheet: Figure 1C
	E13.5 Mammary Epithelium
Age of Mammary Mesenchyme	E13.5	E15.5	E16.5
	3	3	4
	3	4	4
	3	5	5
	4	4	3
	4	4	5
	4	2	5
	5	4	4
	4	4	2
	4	4	2
	5	3	2
	3	4	2
	4	3	2
	4	5	3
	4	3	2
	4		2
	4		4
	3		4
	3		4
	4		5
	4		4
	4		4
	4		4
	4		4
	3		3
	3		4
	4		4
	4		3
	4		4
	4		3
	3		4
	3
	4
	3
	3
	3
	3
	4
	3
	3
	4
	4
	3
	3
	3
	3
	3

## Sheet: Figure 1E
	E13.5 Mammary Mesenchyme
Age of Mammary epithelium	E13.5	E15.5	E16.5
	3	1	1
	3	1	1
	3	1	1
	4	2	1
	4	1	1
	4	1	1
	5	1	1
	4	2	1
	4	1	1
	5	2	1
	3	1	1
	4	2	1
	4	1	1
	4	2	1
	4	2	1
	4	1	1
	3	1	1
	3	2	0
	4	2	0
	4	2	0
	4		0
	4		0
	4		0
	3		0
	3		0
	4		0
	4		0
	4
	4
	3
	3
	4
	3
	3
	3
	3
	4
	3
	3
	4
	4
	3
	3
	3
	3
	3

## Sheet: Figure 1I
	E13.5			E14.5			E15.5			E16.5
mammary eptihelia number	Total	branching ones	Percentage (%)	Total	branching ones	Percentage (%)	Total	branching ones	Percentage (%)	Total	branching ones	Percentage (%)
	12	0	0	17	0	0	26	0	0	40	19	47.5
	10	0	0	6	0	0	16	4	25	14	8	57.1429
	20	0	0	13	0	0	10	2	20	8	7	87.5
	20	0	0				7	0	0	18	16	88.8889
										20	15	75
										4	4	100
										11	10	90.9091
										8	7	87.5
										20	15	75
										9	9	100
