# Supplementary material for: Mesenchyme instructs growth while epithelium directs branching in the mouse mammary gland
Source: eLife. 2024 Mar 5;13:e93326. doi: 10.7554/eLife.93326 (PMC10959526; doi:10.7554/eLife.93326)
Supplement: Figure 2—source data 1. [file elife-93326-fig2-data1.xlsx]

## Sheet: Figure 2B
Volume(µm3)	E13.5	E14.5	E15.5	E16.5
	604000	750000	1280000	1600000
	432000	803000	1140000	2090000
	409000	699000	1220000	1360000
	557000	831000	1400000	1780000
	597000	755000	1170000	1840000
	620000	667000	1280000	1840000
	770000	779000	1170000	1670000
	676000	729000	1200000	1940000
	693000	827000	1450000	1780000
	785000	837000	1260000	1700000
	735000	788000	1350000	1820000
	682000	743000	1260000	1440000
	619000	657000	1500000	1750000
	609000	815000	1270000	1760000
	590000	760000	1360000	1440000
		838000	1520000	1540000
		745000	1410000	2060000
		900000	1270000	1810000
		777000	1360000	1900000
		789000	1300000	2100000
		725000	1450000	1790000
		839000	1470000	1930000
		564000	1600000	1960000
		949000	1770000	2090000
		771000	1740000	2830000
			1670000	2720000
			1850000	2310000
			1500000	2320000
			1490000	2010000
			1470000	1940000
			1170000	2450000
			1330000	2100000
			1480000	2300000
			1270000	2090000
			926000	1350000
			1030000	2010000
			1190000	1720000
			1270000	1800000
			1000000	2180000
			973000	1910000
			1000000
			760000
			987000
			937000

## Sheet: Figure 2C
Tip number	E13.5	E14.5	E15.5	E16.5
	1	1	1	1
	1	1	1	3
	1	1	1	2
	1	1	1	2
	1	1	1	2
	1	1	1	2
	1	1	1	2
	1	1	1	2
	1	1	1	1
	1	1	1	2
	1	1	1	2
	1	1	1	1
	1	1	1	2
	1	1	1	1
	1	1	1	2
		1	1	3
		1	1	2
		1	1	2
		1	1	2
		1	1	3
		1	1	3
		1	1	2
		1	1	3
		1	1	3
		1	1	2
			1	2
			1	2
			1	2
			1	2
			1	4
			1	3
			1	4
			1	3
			1	2
			1	1
			1	2
			1	1
			1	2
			1	3
			1	2
			1
			1
			1
			1

## Sheet: Figure 2E
	E13.5		E14.5		E15.5		E16.5
Percentage total cells	S/G2/M	G0/G1	S/G2/M	G0/G1	S/G2/M	G0/G1	S/G2/M	G0/G1
	3.86905	86.3727	15.1724	74.3431	27.7311	56.257	27.7554	51.9363
	9.69793	96.131	15.9404	69.9475	28.8253	57.764	31.3404	62.2501
	13.6273	75.7412	20.274	73.494	29.2653	55.5437	31.7172	66.6159
	17.5701	73.8676	20.5584	65.8809	29.2845	56.1676	32.0665	72.2446
	21.1679	72.3214	21.0896	73.0693	31.9793	59.1143	32.656	63.1764
	22.24	71.2934	21.4506	77.0732	32.1361	48.8683	33.3841	68.2828
	22.4599	77.305	21.8418	79.726	33.8391	50.9259	33.7764	51.788
	22.695	78.8321	22.029	79.4416	34.1888	58.5499	33.9031	54.3379
	24.2588	66.6667	22.0974	84.8276	35.7143	62.8043	33.9729	60.925
	24.3142	77.5401	22.1557	74.026	36.2934	68.0207	34.5026	56.516
	26.1324	75.6858	22.9268	78.9104	37.0795	72.2689	34.6184	61.1958
	27.6786	70.0326	23.2163	76.7837	37.1957	62.9205	34.7578	65.3816
	28.7066	82.4299	24.7813	75.2187	40.8857	70.7347	35.1168	62.7519
	29.9674	90.3021	25.062	67.1698	41.1581	70.7155	35.3135	58.0402
	33.3333	77.76	25.6569	74.938	41.3737	66.1609	35.5856	64.4144
			25.974	77.971	41.4501	71.1747	35.9624	65.4974
			26.506	78.5494	42.236	67.8639	36.3106	66.2236
			26.9307	77.8443	43.743	58.8419	36.7949	58.3439
			28.9308	77.9026	43.8324	63.7066	36.8236	63.6894
			29.1513	70.8487	43.8967	65.8112	37.2481	65.2422
			29.9392	78.1582	44.4563	58.6263	37.6997	57.4458
			30.0525	70.0608	45.977	64.2857	37.7499	64.0376
			32.8302	84.0596	46.1153	52.1855	38.4986	60.6673
			34.1191	71.0692	47.2656	56.1033	38.8042	62.3003
					47.5816	51.2281	39.075	67.344
					47.5862	50.1773	39.3327	64.8832
					47.8145	52.7344	40.1266	66.0271
					48.1964	50.4115	40.2263	46.7197
					48.6438	47.3807	41.6561	68.6596
					48.7719	52.4184	41.9598	66.0969
					49.0741	45.6548	42.5542	59.8734
					49.2588	50.1068	43.484	67.9335
					49.5885	53.8847	45.6621	61.5014
					49.8227	48.5981	48.0637	59.7737
					49.8932	47.9691	48.212	64.6865
					51.1317	52.4138	53.2803	63.2051
					51.4019	51.8036
					52.0309	50.7412
					52.6193	51.3562
					52.7439	47.2561
					54.3452	54.023

## Sheet: Figure 2H
	E13.5		E14.5		E15.5		E16.5
Percentage of Proliferating cells	Basal	Inner	Basal	Inner	Basal	Inner	Basal	Inner
	13.58	13.67	27.57	31.67	49.53	41.87	67.45	32.11
	24.36	27.76	18.47	33.57	52.67	50.09	32.04	23.85
	22.97	22.51	17.34	23.08	46.8	17.16	61.77	36.61
	19.08	24.77	20.94	21.19	44.61	21.67	73.22	22.54
	13.04	20.98	25.47	36.55	46.32	24.6	58.88	17.59
	4.25	3.23	19.59	22.58	43.06	30.07	69.44	25.93
	25.06	30.62	28.89	29.34	54.85	46.44	62.24	20.62
	14.91	26.72	22.75	29.65	65.3	43.61	63.8	27.94
	18.7	28.73	12.33	28.79	64.22	51.06	52.12	25.51
	7.91	11.5	12.94	17.09	59.65	47.79	40.47	29.11
	21.36	28.48	21.13	25	54.65	45.93	69.35	43.85
	21.02	35.4	19.23	29.27	43.44	43.95	56.36	31.46
	29.87	36.31	20.27	23.61	40.15	46.56	53.31	32.46
	26.95	32.53	18.55	24.1	44.38	52.09	55.04	25.24
	18.32	25.28	17.18	14.94	42.55	34.67	35.69	37.51
			20.52	30.29	52.83	29.81	57.43	35.59
			24.92	40.33	43.27	28.92	59.14	24.16
			9.52	27.52	50.34	36.32	58.99	22.41
			18.92	31.35	52.78	35.15	66.11	25.97
			20.26	28.42	50.85	46.41	49.17	34.99
			13.99	27.96	56.71	47	43.45	30.72
			17.58	25.55	59.02	50.08	56.93	22.15
			26.18	32.64	57.45	46.64	47.74	24.86
			20.42	33.79	56.23	50.34	53.83	26.02
					52	46.93	47.22	23.73
					55.08	51.69	45.39	23.86
					44.85	40.67	55.4	25.56
					40.65	41.03	63.8	20.51
					42.4	40.85	57.96	22.57
					46.22	25.29	53.07	18.44
					42.99	22.67	55.98	22.35
					41.12	23.1	53.33	29.81
					50.43	29.05	41.08	30.07
					50	29.23	54.8	26.3
					50.37	40.89	54.4	29.52
					50.71	45.96	53.66	29.03
					63.97	41.28
					51.98	43.78
					58.75	43.33
					60.17	45.24
					61.22	37.69
