# Supplementary material for: Mesenchyme instructs growth while epithelium directs branching in the mouse mammary gland
Source: eLife. 2024 Mar 5;13:e93326. doi: 10.7554/eLife.93326 (PMC10959526; doi:10.7554/eLife.93326)
Supplement: Figure 3—figure supplement 1—source data 1. [file elife-93326-fig3-figsupp1-data1.xlsx]

## Sheet: Figure 3 - Figure supplement 1C
	E13.5
Mammary gland volume(x 10e5 µm3)	WT	Eda-/-
	5.61638	3.243
	5.49418	3.575
	3.76	3.12
	4.46	3.36
	4.83876	3
	4.5707	2.86
	4.06	2.77
	3.7	2.96
		4.52092
		4.76862
		5.02743
		2.84
		3.5

## Sheet: Figure 3 - Figure supplement 1D
	E13.5
Average Cell Volume ( µm3)	WT	Eda-/-
	241.728	233.154
	229.362	218.446
	225.964	215.64
	248.658	217.631
	236.531	221.134

## Sheet: Figure 3 - Figure supplement 1E
	E15.5
Average Cell Volume ( µm3)	WT	Eda-/-
	328.764	299.317
	332.962	282.813
	309.006	304.003
	326.596	270.659
	371.031	270.659
	316.396
