# Supplementary material for: Mesenchyme instructs growth while epithelium directs branching in the mouse mammary gland
Source: eLife. 2024 Mar 5;13:e93326. doi: 10.7554/eLife.93326 (PMC10959526; doi:10.7554/eLife.93326)
Supplement: Figure 3—source data 1. [file elife-93326-fig3-data1.xlsx]

## Sheet: Figure 3B
	E13.5		E14.5
Volume(µm3)	WT	K14-Eda	WT	K14-Eda
	390000	1030000	1060000	2070000
	525000	1360000	688000	1970000
	521000	1130000	1060000	1750000
	507000	745000	1070000	2150000
	523000	1620000	985000	2520000
	505000	1170000	1280000	1980000
	488000	1860000	626000	3010000
	660000	1330000	903000	3400000
	698000	1080000	814000	2750000
	731000	972000	911000	1870000
	586000	1470000	928000	2020000
	635000	1330000	1000000	1770000
	538000	966000	1160000	1860000
	558000	1590000	1200000	4370000
	536000	1180000	980000	1370000
	516000	1010000	1150000	2000000
	593000	1390000	1020000	2570000
		1160000	865000	1250000
		1110000	849000	2550000
		1490000	809000	2040000
		1240000	807000	2190000
			748000	2140000
			896000
			1000000
			1040000
			1130000
			1040000

## Sheet: Figure 3C
	E13.5		E14.5
Tip number	WT	K14-Eda	WT	K14-Eda
	1	1	1	1
	1	1	1	1
	1	1	1	1
	1	1	1	1
	1	1	1	1
	1	1	1	1
	1	1	1	2
	1	1	1	2
	1	1	1	3
	1	1	1	2
	1	1	1	1
	1	1	1	2
	1	1	1	2
	1	1	1	3
	1	1	1	1
	1	1	1	2
	1	1	1	2
		1	1	1
		1	1	3
		1	1	1
		1	1	3
			1	1
			1
			1
			1
			1
			1

## Sheet: Figure 3D
	E13.5				E14.5
	WT		K14-Eda		WT		K14-Eda
Percentage total cells	S/G2/M	G0/G1	S/G2/M	G0/G1	S/G2/M	G0/G1	S/G2/M	G0/G1
	2.17865	82.9439	26.2425	60.7143	16.4557	79.5717	37.5643	47.9371
	2.53456	95.9488	27.1429	73.7575	18.453	68.609	49.7041	50.2959
	2.7833	82.8054	27.8416	69.9029	20.4283	68.0995	50.2646	36.5805
	3.19149	75.4153	28.465	61.5385	22.1408	73.6334	51.5702	62.4357
	4.05117	97.4654	29.878	64.8169	23.3596	73.7018	51.9298	40.1989
	4.9505	86.6995	29.9643	64.2978	24.1144	70.4036	52.0629	42.6431
	10.6996	83.3002	30.0971	52.7062	24.9595	62.2287	54.3424	20.558
	11.9097	97.2167	31.8367	70.122	26.2982	83.5443	55.0088	40.6959
	13.3005	88.0903	32.9618	63.0345	26.3666	67.9092	56.4725	41.8546
	16.6998	82.6087	33.5856	54.329	27.2981	75.0405	57.3569	31.2127
	17.0561	97.8214	35.1831	68.1633	29.5964	81.547	58.1454	44.9912
	17.1946	89.3004	35.7022	67.0382	29.9703	77.8592	58.6066	48.4298
	17.3913	96.8085	36.0852	54.9223	31.391	70.0297	59.3041	43.5275
	17.6591	81.2236	36.9655	70.0357	31.9005	76.6404	59.8011	48.0702
	18.7764	82.3409	38.4615	71.535	32.0908	75.8856	63.4195	21.6152
	20.7317	95.0495	39.2857	45.8239	37.7713	72.7019	68.7873	49.7354
	24.5847	79.2683	41.1429	66.4144			78.3848	41.3934
			45.0777	63.9148			79.442	45.6576
			45.671	58.8571
			47.2938	72.8571
			54.1761	72.1584

## Sheet: Figure 3E
	E13.5				E14.5
	WT		K14-Eda		WT		K14-Eda
Percentage proliferating cells	Basal	Inner	Basal	Inner	Basal	Inner	Basal	Inner
	14.78	19.7	32.42	43.7	16.82	22.48	59.59	49.04
	3.4	5.14	21.79	28.46	19.21	36.22	59.32	32.04
	11.38	24.49	21.71	32.83	26.96	33.64	60.92	47.38
	25.6	23.31	47.79	33.02	21.43	28.88	82.43	60.14
	2.33	2.99	43.48	31.52	18.27	30.59	93.44	52.75
	9.52	18.29	33.13	36.66	22.53	35.11	89.76	50.58
	17.04	16.43	54.83	42.8	34.53	39.95	93.88	73.61
	2.98	2.49	35.64	27.23	9.62	21.19	93.14	53.13
	5.49	18	29.59	39.7	24.04	36.19	83.1	52.74
	15.05	20.37	51.54	43.37	16.77	27.85	95.6	62.86
	1.49	3.16	34.59	30.16	16.28	19.79	72.41	51.87
	8	13.56	28.4	34.64	17.42	23.81	79.44	45.58
	2.24	5.1	45.16	45.04	22.66	35.1	75.7	52.45
	12.44	23.13	25.98	31.69	20	25.26	82.32	43.77
	22.42	11.17	15.94	31.71	16.14	28.33	95.45	75.21
	4.56	5.56	65.77	50.3	28.18	26.91	60	49.58
	21.31	20.16	33.96	33.38			73.68	54.96
			31.94	37.5			54.55	54.32
			48.77	37.74
			21.55	30.2
			17.73	31.38

## Sheet: Figure 3G
	E13.5		E14.5
Percengate of branching Epithalia	WT	K14-Eda	WT	K14-Eda
	0	0	0	59.09
	0	12.5	0	77.78
	0	2.44	0	61.11
	0	0
	0	0
		0

## Sheet: Figure 3I
	E15.5		E16.5
Volume(µm3)	WT	Eda-/-	WT	Eda-/-
	1100000	840000	2560000	1910000
	1280000	932000	2420000	2100000
	1220000	523000	2630000	1140000
	1430000	821000	2420000	1640000
	1200000	1010000	2840000	2030000
	1310000	502000	2020000	1330000
	1500000	1270000	2240000	1580000
	1280000	1490000	2910000	1720000
	1390000	752000	2460000	2230000
	1540000	1190000	2270000	2150000
	1370000	1520000	2990000	1740000
	1510000	976000	2390000	1670000
	1850000	965000	2540000	1110000
	1280000	1060000	2660000	1860000
	1400000	650000	3170000	1360000
	1270000	905000	2450000	1370000
	1650000	1030000	4520000	1260000
		650000	4310000	1150000
		935000	2530000	1310000
		947000	4220000	1260000
		841000	4450000	1070000
		1150000	3150000	1430000
		1260000	2620000	1020000
		786000	3740000	1250000
		1060000	4710000	1630000
		1310000	2830000	1190000
		858000	2510000	1140000
		1170000	3860000	1790000
		1500000	2670000	1070000
		902000	3800000	2000000
		1260000	3540000	2250000
		1370000	2560000	1430000
		945000		2030000
				2550000
				1180000
				2010000
				2070000
				1570000
				1300000
				1070000
				900000
				1060000
				1440000
				1150000
				1420000
				1700000
				925000
				1680000
				2250000
				1320000
				1340000
				1810000
				1060000
				1630000
				815000
				1670000
				1530000
				1150000
				2460000
				2780000
				1280000
				2040000
				2940000
				2120000
				2730000
				1760000
				2530000
				1020000

## Sheet: Figure 3J
	E15.5		E16.5
Tip number	WT	Eda-/-	WT	Eda-/-
	1	1	3	1
	1	1	3	1
	1	1	4	1
	1	1	2	2
	1	1	2	4
	1	1	2	1
	1	1	2	1
	1	1	3	2
	1	1	4	1
	1	1	2	3
	1	1	3	1
	1	1	2	1
	1	1	2	1
	1	1	2	2
	1	1	2	1
	1	1	2	1
	1	1	4	1
		1	3	1
		1	3	1
		1	2	1
		1	3	1
		1	3	1
		1	1	1
		1	3	1
		1	4	1
		1	2	1
		1	1	1
		1	4	1
		1	3	1
		1	2	1
		1	3	2
		1	2	1
		1		1
				1
				1
				1
				1
				1
				1
				1
				1
				1
				1
				1
				1
				1
				1
				1
				1
				1
				1
				1
				1
				1
				1
				1
				1
				1
				1
				2
				1
				2
				1
				1
				4
				1
				3
				1

## Sheet: Figure 3K
	E15.5				E16.5
	WT		Eda-/-		WT		Eda-/-
Percentage total cells	S/G2/M	G0/G1	S/G2/M	G0/G1	S/G2/M	G0/G1	S/G2/M	G0/G1
	40.2162	55	28.3862	65.9913	44.1882	40.0792	17.148	48.1595
	41.4406	52.4862	28.961	62.3729	45.6728	46.7559	22.7083	47.078
	41.906	58.094	32.4786	71.6138	45.8748	31.619	23.2824	51.9112
	42.7252	53.1532	33.0233	65.2174	46.7062	34.3093	24.4652	28.3967
	42.921	54.4164	33.3996	61.0108	46.9328	32.6763	25.1694	36.1954
	43.4622	54.386	34.0087	71.039	49.4901	38.7006	26.4382	27.4336
	44.2623	52.3284	34.7826	60.0519	49.9753	36.4429	29.0957	27.1923
	45	57.079	35.576	53.1915	51.3595	33.3679	29.1174	42.3418
	45.5836	53.4913	36.3388	63.167	52.545	30.998	29.4274	32.2091
	45.614	53.4386	36.833	56.5217	53.2441	31.9439	29.5539	38.799
	45.7587	55.7377	37.1571	52.3515	54.4582	34.6509	29.5597	32.2835
	46.5087	50.3326	37.6271	62.8429	54.8046	37.8869	30.2604	39.0904
	46.5614	56.5378	38.9892	64.424	55.4789	41.4398	30.6291	39.1982
	46.8468	59.7838	39.0684	57.0762	56.9831	41.2698	30.661	54.4744
	47.5138	58.5594	39.9481	63.6612	58.5216	41.4784	31.6067	59.6919
	47.6716	54.2413	40.9434	60.9316	58.5602	43.0169	34.1029	51.7951
	49.6674	57.2748	42.5989	55.3175	58.7302	54.1252	34.2736	52.7624
			42.9238	66.9767	59.0306	50.0247	35.4603	58.3902
			43.4783	54.3834	59.6059	55.8118	35.7206	56.0669
			44.6825	47.4839	59.9208	54.3272	35.7988	70.5726
			45.6166	59.0566	61.2294	53.0672	35.8765	58.976
			46.8085	51.2821	61.2994	53.2938	35.9694	63.2653
			47.6485	50.4749	62.1131	38.7706	36.1465	63.6441
			47.7273	52.2727	63.2229	36.457	36.252	63.748
			48.7179	66.6004	63.543	45.1954	36.3559	74.8306
			49.5251	57.4011	63.5571	48.6405	36.3636	63.6364
			52.5161	67.5214	65.3491	50.5099	36.4369	69.3709
					65.6907	40.3941	36.7241	55.5018
					66.6321	47.455	36.7347	65.7264
					67.3237	45.5418	37.9009	76.7176
					68.0561	29.9601	40.3081	69.339
					68.381	36.7771	41.024	73.5618
					69.002	40.9694	41.6098	63.2759
					70.0399	44.5211	43.0913	64.2012
							43.3076	68.3933
							43.6499	77.2917
							43.9331	41.048
							44.4982	46.3021
							45.5256	70.9043
							46.1947	64.1235
							46.6879	63.8535
							46.8085	82.852
							47.2376	70.4461
							48.0888	69.7396
							48.2049	70.4403
							48.2201	65.8971
							48.7037	70.8826
							51.8405	64.2794
							52.922	64.0306
							53.6979	51.2963
							54.0212	63.5631
							57.2076	62.0991
							57.6582	64.5397
							58.952	56.3501
							60.8018	75.5348
							60.9096	45.9788
							61.201	53.3121
							62.0623	53.1915
							63.8046	42.7924
							67.7165	56.6924
							67.7909	53.8053
							71.6033	37.9377
							72.5664	51.7799
							72.8077	56.9087

## Sheet: Figure 3L
	E15.5				E16.5
	WT		Eda-/-		WT		Eda-/-
Percentage proliferating cells	Basal	Inner	Basal	Inner	Basal	Inner	Basal	Inner
	52	41.2048	46.4646	29.0061	84.1189	41.7116	86.1789	31.0345
	52.451	45.5769	52.9412	30.2013	82.3377	34.1297	86.6237	33.2864
	52.6316	37.8815	42.4242	22.7823	93.1267	54.8601	83.7681	28.3307
	48.4694	46.2995	46.988	28.3912	94.9182	43.1138	95.0233	55.0549
	50.2857	43.7908	58.4302	30.2356	88.0305	48.4638	89.5054	44.7133
	49.3562	44.0708	41.7355	23.1061	88.8268	51.9849	94.1828	54.4186
	54.4944	45.768	44.7917	37.06	94.1913	44.5621	93.0116	56.746
	46.2312	41.5254	45.6081	47.5877	90.2808	44.7552	91.9142	40.301
	57.0681	43.2079	47.619	29.7143	91.1993	50.5731	95.4233	51.6689
	57.085	42.5	47.9853	41.0609	93.4116	46.692	87.4396	41.2144
	48.374	42.5987	48.7013	47	90.1899	41.8	93.1429	46.1165
	56.1181	47.3684	46.6667	30.5085	75.8065	50.2982	91.4543	39.6875
	46.6431	42.3412	37.6176	34.7258	75.0129	42.4471	79.4326	52.2727
	49.4382	36.4742	46.4623	41.1833	76.1317	42.5287	68.6869	28.6241
	42.3077	41.1239	48.9051	28.821	81.8829	44.7552	61.426	28.8823
	54.5455	42.6256	43.9678	36.377	75.0781	42.954	78.691	32.0129
	42.9553	42.6087	49.1561	42.1369	67.8026	29.8019	77.5039	30.3187
			40.6452	28.7273	74.2004	29.0708	73.3656	29.1548
			55.2846	40.0468	70.2076	27.8714	73.9326	26.1333
			56.8027	49.896	72.973	29.6267	60.9302	16.791
			56.9948	31.7507	75.7921	28.9328	67.9785	25.7114
			57.5221	45.1264	80.8394	27.4227	69.4779	21.4953
			51.89	47.9821	83.3333	49.2537	70.3297	21.201
			64.6259	40.3561	87.5133	48.5294	61.8449	19.8658
			42.8571	28.6567	85.5478	38.2979	46.7492	15.3521
			47.561	39.6768	81.5857	31.7276	59.8113	19.1989
			46.5812	23.0769	82.2188	28.1467	57.5758	17.4877
					90.2752	40.5251	82.3105	25.4545
					83.7638	30.1237	66.8103	18.4486
					77.4603	36.9565	72.6619	5.45455
					95.1586	53.3776	60.9756	18.3794
					93.3333	46.9469	42.8571	15.7576
					91.7197	37.1915	63.253	26.087
					87.0906	34.6056	66.787	24.152
							54.8872	19.0541
							57.3643	9.97151
							81.7935	43.6131
							81.7152	36.226
							76.8421	13.2635
							66.6667	20.1646
							66.2818	20.2916
							66.3866	3.67816
							50.1333	18.5449
							51.7103	18.7229
							48.1707	19.8083
							57.2695	20.3782
							52.7108	18.9048
							66.5025	18.4828
							72.5664	21.147
							88.5475	28.9474
							77.2436	20.6211
							73.822	24.0404
							65.5882	18.8312
							75.6757	22.7513
							63.8418	12.2592
							89.1204	36.9074
							85.4442	26.9933
							88.4462	25.9481
							88.5167	38.1022
							79.9632	25.7696
							69.4611	36.4322
							92.9619	46.7249
							85.687	28.9912
							82.8571	30.1242

## Sheet: Figure 3N
	E16.5
Percengate of branching Epithalia	WT	Eda-/-
	100	33.33
	100	33.33
	100	0
	80	66.67
	100	60
	100	33.33
	100	66.67
	100	0
	100	60
	100	20
		50
		0
		100
		80
		66.67
		100
		50
		50
		16.67
