# Supplementary material for: Mesenchyme instructs growth while epithelium directs branching in the mouse mammary gland
Source: eLife. 2024 Mar 5;13:e93326. doi: 10.7554/eLife.93326 (PMC10959526; doi:10.7554/eLife.93326)
Supplement: Figure 4—source data 1. [file elife-93326-fig4-data1.xlsx]

## Sheet: Figure 4C
% of Lateral branching events	Mesenchyme	Salivary		Mammary
	Epithelium	Salivary	Mammary	Mammary
		0	72.22	62.5
		0	50	66.67
		3.57	66.67	75
		0	50	70
		0	69.23
		0	70.59
		0	50
		0	74.19
			65
