# Supplementary material for: Mesenchyme instructs growth while epithelium directs branching in the mouse mammary gland
Source: eLife. 2024 Mar 5;13:e93326. doi: 10.7554/eLife.93326 (PMC10959526; doi:10.7554/eLife.93326)
Supplement: Figure 6—source data 1. [file elife-93326-fig6-data1.xlsx]

## Sheet: Figure 6B
Number of GFP+ cells /10e6 µm3	E13.5 MM	E16.5 MM	E13.5 SM
	224.76	2.9	16.66
	271.72	4.9	9.88
	174.77	2.3	11.09
	172.14	5.71	16.13
	255.09	7.42	11.17
	160.56	2.47	20.4
		4.7
		5.76
		8.13
		14.01
		8.12
		6.58
		8.61
		16.42
		7.37
		7.01

## Sheet: Figure 6E
	WT Epithelia + AAV8-Cre
Tip number	WT Mesenchyme	ß-catenin mesenchyme
	1	3
	2	3
	4	6
	5	7
	5	13
	10	14
	11	15
	15	16
	22	19
		20
		20
		20
		22
		28
		30
		30
		39
		41

## Sheet: Figure 6H
	Eda						Igf1
Normalized count number	E13.5 VM	E13.5 MM	E16.5 MM	E16.5 FP	E13.5 SM		E13.5 VM	E13.5 MM	E16.5 MM	E16.5 FP	E13.5 SM
	299.212	353.288	307.349	559.685	626.355		2239.9	4398.86	9125.55	11255.1	23350.1
	229.405	295.531	405.694	732.452	821.603		4298.05	4386.53	10658.1	11233.7	20829.6
	251.105	358.09	356.666	482.443	698.998		1644.3	6049.02	8521.85	7564.99	21995.3
	205.514	303.896	406.319	607.62	850.124		1535.83	3941.06	7877.76	10409.2	21142.3
	291.043	266.87	439.914	353.639	897.703		1184.15	3698.74	12998.1	6807.84	20787.7
