# Supplementary material for: Mesenchyme instructs growth while epithelium directs branching in the mouse mammary gland
Source: eLife. 2024 Mar 5;13:e93326. doi: 10.7554/eLife.93326 (PMC10959526; doi:10.7554/eLife.93326)
Supplement: Figure 7—figure supplement 1—source data 1. [file elife-93326-fig7-figsupp1-data1.xlsx]

## Sheet: Figure 7 - Figure supplement 1A
		MG1			MG2			MG3			MG4
mammary gland area (x 10e5 µm2)		Igf1r+/+	Igf1r+/-	Igf1r-/-	Igf1r+/+	Igf1r+/-	Igf1r-/-	Igf1r+/+	Igf1r+/-	Igf1r-/-	Igf1r+/+	Igf1r+/-	Igf1r-/-
		3.8272	4.67445	0.0821533	2.73484	2.22442	0.5075	2.41127	2.26811	n.d	2.09929	2.33893	0.337179
		4.15281	3.87204	0.510429	2.12762	2.25991	0.52594	3.17112	2.52236		2.33332	1.74484	0.256871
		2.94808	4.85731	0.10082	2.04263	2.23247	0.430425	1.72898	2.69735		1.69006	2.80105	0.168294
		3.16393	2.865	0.413264	2.13835	2.8296	0.365253	1.97503	1.82592		1.69496	1.36029	0.620136
		4.57813	2.89463	0.346175	3.16297	1.5911	1.30562	2.44122	2.35103		2.21058	1.70882	0.686449
		4.04537	4.30005	0.387711	2.72706	1.86549	0.979751	2.00146	2.79575		2.83745	3.19202	0.282377
		3.38212	5.37987	0.224882	2.46236	2.78541	0.487727	2.66205	2.85488		2.37009	2.55095	0.0889858
		3.46542	4.70046	0.322144	2.42746	3.29451	0.539567	2.81307	1.80718		1.94701	1.81682	0.1411
		4.04954	2.35455	0.16155	2.71588	1.97733	0.382688	3.00343	1.49146		1.9754	1.89778	0.207568
		5.51058	3.05908	0.125998	2.72771	1.44349	0.310348	2.41095	1.96761		2.02053	1.86355	0.339359
		4.60773	2.89844		2.15003	2.05988	0.40669	2.43568	1.93946		2.0615	1.96578	0.136171
		4.0959	3.37118		2.47526	1.72936	0.447339	1.72997	2.42591		2.40812	2.63169	0.1545
		3.00915	3.69382		1.34905	2.60621	0.208364	1.73028	1.95192		1.52347	1.69035	0.459596
		2.50349	2.72143		1.80527	2.36224	0.272066	2.5877	2.05486		1.37549	1.5356	0.590005
		5.2891	3.04443		3.06781	0.954248	0.756769	3.09932	1.67161		2.03435	1.60032
		5.35189	2.7988		3.25982	1.22819	0.738139		2.17318		1.9251	1.3062
			2.58183			1.60965			2.87003			2.07064
			3.48762			1.76619			3.15164			2.21644
			3.67091						3.28468			2.52994
			3.37085									2.89978
			3.25611
			3.07195

## Sheet: Figure 7 - Figure supplement 1B
		MG1			MG2			MG3			MG4
Tip number		Igf1r+/+	Igf1r+/-	Igf1r-/-	Igf1r+/+	Igf1r+/-	Igf1r-/-	Igf1r+/+	Igf1r+/-	Igf1r-/-	Igf1r+/+	Igf1r+/-	Igf1r-/-
		19	18	1	14	10	3	14	9	n.d	6	5	2
		41	26	1	17	9	2	27	19		7	10	2
		12	34	1	8	12	1	7	19		7	10	1
		18	18	1	9	9	3	11	9		7	4	2
		27	16	1	15	8	6	15	14		12	7	1
		35	22	1	12	8	6	9	16		10	15	2
		15	43	1	11	12	2	10	18		5	14	1
		27	36	1	10	12	2	17	10		5	5	2
		23	9	1	10	7	2	14	11		7	5	1
		43	15	1	16	6	2	13	9		9	5	1
		30	16		14	7	1	13	8		8	8	1
		28	13		17	7	1	8	12		8	11	1
		10	15		5	7	1	11	6		5	7	1
		6	12		5	7	1	12	9		4	4	2
		48	10		12	4	3	9	8		10	4
		36	6		18	4	4		14		9	6
			14			6			14			6
			19			6			15			8
			21			9			14			10
			19			12						8
			17			8
			19			9

## Sheet: Figure 7 - Figure supplement 1C
	E13.5
Body weight (g)	Igf1r+/+	Igf1r+/-	Igf1r-/-
	0.1395	0.1391	0.084
	0.139	0.1277	0.0761
	0.1454	0.1328	0.092
	0.1468	0.135
	0.16	0.1221
		0.1387
		0.1412
		0.1373
		0.1287
		0.1512
		0.0898
		0.1345
		0.1529
