# Supplementary material for: Mesenchyme instructs growth while epithelium directs branching in the mouse mammary gland
Source: eLife. 2024 Mar 5;13:e93326. doi: 10.7554/eLife.93326 (PMC10959526; doi:10.7554/eLife.93326)
Supplement: Figure 7—source data 1. [file elife-93326-fig7-data1.xlsx]

## Sheet: Figure 7B
Tip number	BSA	IGF1 (150 ng/ml)
	15	56
	5	9
	11	48
	23	8
	9	24
	8	36
	8	30
	26	23
	19	91
	16	24
	30	24
	34	15
	16	21
	22	10
	16	60
	15	19
	21	35
	29	59
	23	14
	32	18
	13	27
	25	11
	70	31
	47	17
	28	15
	32	41
	9	32
	10	8
	44	15
	31	39
	16	37
	25	22
	25	31
		41
		14
		45
		41
		61
		29
		40

## Sheet: Figure 7C
	E16.5				E18.5
Body weight (g)	Igf1r+/+	Igf1r+/-	Igf1r-/-		Igf1r+/+	Igf1r+/-	Igf1r-/-
	0.44	0.45	0.242		1.2931	1.1663	0.4671
	0.46	0.46	0.239		1.1899	1.0695	0.4241
	0.48	0.37	0.2529		0.9538	1.0463	0.3668
	0.5	0.43	0.2803		1.0461	0.9988	0.408
	0.5	0.44	0.2632		1.1835	0.999	0.43
	0.45	0.5315	0.28		1.0207	0.955	0.53
	0.53	0.5214	0.3		1.2289	1.071	0.49
	0.5577	0.5242			1.1611	0.935	0.54
	0.77	0.5094			1.178	1.056	0.45
	0.67	0.5176			1.18	0.905	0.43
		0.4843			1.0241	1	0.42
		0.5867			0.8614	1.07	0.38
		0.77			1.1697	1.01	0.52
		0.72			1.237	1.02	0.51
		0.63			1.2283	1.06	0.63
		0.5			1.293	1.13	0.62
					1.16	1.05	0.49
					1.12	0.88
					1.2	1.21
					1.11	1.17

## Sheet: Figure 7E
		MG1			MG2			MG3			MG4
Normalized mammary gland area		Igf1r+/+	Igf1r+/-	Igf1r-/-	Igf1r+/+	Igf1r+/-	Igf1r-/-	Igf1r+/+	Igf1r+/-	Igf1r-/-	Igf1r+/+	Igf1r+/-	Igf1r-/-
		3.41714	4.40986	0.182563	2.44182	2.0985	1.12778	2.15292	2.13972	n.d	1.87437	2.20654	0.749287
		3.70787	3.65287	1.13429	1.89966	2.13199	1.16875	2.83135	2.37958		2.08332	1.64607	0.570825
		3.09088	4.62601	0.162612	2.14157	2.12616	1.02482	1.81273	2.56891		1.77192	2.66766	0.400701
		3.31718	2.72857	0.666555	2.24193	2.69486	0.869649	2.07069	2.07491		1.77706	1.54579	1.00022
		3.8683	3.28935	0.741116	2.67255	1.80807	2.10584	2.06272	2.67162		1.86784	1.94184	1.10718
		3.41814	4.88641	0.950271	2.30423	2.11988	1.58024	1.96087	2.38953		2.3975	2.72822	0.604533
		3.31353	4.59818	0.55118	2.41243	2.3807	1.04416	2.60806	2.44007		2.32202	2.1803	0.218103
		3.39514	4.01748	0.749172	2.37823	2.81582	1.15514	2.38801	1.68974		1.90752	1.69876	0.345834
		3.43764	2.20154	0.440431	2.3055	1.84884	0.937961	2.5496	1.39454		1.67691	1.9872	0.482717
		4.67791	2.86029	0.237733	2.31554	1.34969	0.760658	2.04318	2.06032		1.71522	1.95136	0.789208
		3.90486	3.03502		1.82206	2.15694	0.945791	2.06414	2.03085		1.74703	1.83546	0.37124
		3.47111	3.53003		2.09768	1.81085	1.04032	1.68926	2.26509		2.04078	2.45723	0.42121
		2.93834	3.44895		1.31731	2.43344	0.56806	1.68956	2.15682		1.48762	1.86779	0.867162
		2.44458	2.54102		1.76279	2.20564	0.74173	2.10674	2.27056		1.34312	1.6968	1.11322
		4.30603	3.36401		2.4976	1.05442	1.42787	2.52326	1.67362		1.65623	1.60224
		4.35716	3.0926		2.65393	1.35711	1.39271		2.1758		1.56729	1.30777
			2.58493			1.61158			2.87003			2.07064
			3.49181			1.76831			3.15164			2.21644
			3.67091			2.22591			3.22027			2.48033
			3.37085			2.76373						2.84293
			3.19227			2.39827
			3.01171			2.90808

## Sheet: Figure 7F
		MG1			MG2			MG3			MG4
Normalized tip number		Igf1r+/+	Igf1r+/-	Igf1r-/-	Igf1r+/+	Igf1r+/-	Igf1r-/-	Igf1r+/+	Igf1r+/-	Igf1r-/-	Igf1r+/+	Igf1r+/-	Igf1r-/-
		16.9643	16.9811	2.22222	12.5	9.43396	6.66667	12.5	8.49057	n.d	5.35714	4.71698	4.44444
		36.6071	24.5283	2.22222	15.1786	8.49057	4.44444	24.1071	17.9245		6.25	9.43396	4.44444
		12.5813	32.381	1.6129	8.3875	11.4286	2.38095	7.33906	18.0952		7.33906	9.52381	2.38095
		18.8719	17.1429	1.6129	9.43594	8.57143	7.14286	11.5328	10.2273		7.33906	4.54545	3.22581
		22.8137	18.1818	2.14087	12.6743	9.09091	9.67742	12.6743	15.9091		10.1394	7.95455	1.6129
		29.5733	25	2.45098	10.1394	9.09091	9.67742	8.81748	13.6752		8.44951	12.8205	4.28174
		14.6958	36.7521	2.45098	10.7769	10.2564	4.28174	9.7972	15.3846		4.8986	11.9658	2.45098
		26.4524	30.7692	2.32558	9.7972	10.2564	4.28174	14.4312	9.35016		4.8986	4.67508	4.90196
		19.5246	8.41515	2.72628	8.48896	6.54511	4.90196	11.8846	10.2852		5.94228	5.2356	2.32558
		36.5025	14.0252	1.88679	13.5823	5.6101	4.90196	11.0169	9.42408		7.64007	5.2356	2.32558
		25.4237	16.7539		11.8644	7.32984	2.32558	11.0169	8.37696		6.77966	7.46965	2.72628
		23.7288	13.6126		14.4068	7.32984	2.32558	7.81174	11.2045		6.77966	10.2708	2.72628
		9.76467	14.0056		4.88234	6.53595	2.72628	10.7411	6.62983		4.88234	7.73481	1.88679
		5.8588	11.2045		4.88234	6.53595	2.72628	9.7696	9.94475		3.90587	4.41989	3.77358
		39.0784	11.0497		9.7696	4.41989	5.66038	7.3272	8.00961		8.14133	4.00481
		29.3088	6.62983		14.6544	4.41989	7.54717		14.0168		7.3272	6.00721
			14.0168			6.00721			14			6
			19.0228			6.00721			15			8
			21			9			13.7255			9.80392
			19			12						7.84314
			16.6667			7.84314
			18.6275			8.82353

## Sheet: Figure 7H
	E13.5		E16.5		E18.5
Mammary gland 2 volume (µm^3)	Igf1r+/+	Igf1r-/-	Igf1r+/+	Igf1r-/-	Igf1r+/+	Igf1r-/-
	504723	262035	885788	286378	9265970	1830860
	346719	260370	934368	341570	9723760	1141060
	470087	297071	3277230	358173	11115900	1099500
	373391	244097	2734850	471586	10468700	431294
	446664	318871	2051130	554244	11391200	580451
	449174	304915	1268600	728905	9268880	4164170
	412801			619153	11402600	6519380
					11233200	1918900
					9423050	1889230
						1155730
						1202420

## Sheet: Figure 7I
	E13.5		E16.5		E18.5
Normalized Mammary gland 2 volume (10e5 µm3/g)	Igf1r+/+	Igf1r-/-	Igf1r+/+	Igf1r-/-	Igf1r+/+	Igf1r-/-
	36.18	31.19	16.71	11.32	97.15	39.2
	24.85	31	17.63	13.51	101.95	27.97
	33.82	39.04	42.56	13.61	108.9	26.95
	26.86	32.08	35.52	16.84	102.56	11.76
	30.72	34.66	30.61	19.79	96.54	15.82
	30.6	33.14	18.93	24.3	78.55	67.16
	28.12			20.64	92.83	105.15
					91.45	42.64
					84.13	41.98
						27.52
						28.63

## Sheet: Figure 7K
	Epithelium	Control	Control	Igf1r-/-	Igf1r-/-
	Mesenchyme	Control	Igf1r-/-	Control	Igf1r-/-
		32	14	6	6
		20	33	5	9
		33	17	0	1
		27	43	1	1
		31	15	4	11
		19	16	6	8
		14	21	3	4
		14	38	1	8
		36	13		1
		1	5		3
		26	36
		43	24
		11	45
		35	45
		24	11
		13
		32
		43
		29
		11
		11
		28
		34
		33
		36
		34
		13
		24
		17
		25
		12
		26
		20
		63
		18
		35
		40
		28
		34
		22
		42
		34
		17
		21
		19
		28
		18
		17
