# Supplementary material for: Mesenchyme instructs growth while epithelium directs branching in the mouse mammary gland
Source: eLife. 2024 Mar 5;13:e93326. doi: 10.7554/eLife.93326 (PMC10959526; doi:10.7554/eLife.93326)
Supplement: Supplementary file 1. [file elife-93326-supp1.xlsx]

## Sheet: Mesenchyme Markers
Genes	Markers_of_tissue	E13.5_VM_121	E13.5_VM_122	E13.5_VM_123	E13.5_VM_126	E13.5_VM_128	E13.5_MM_111	E13.5_MM_113	E13.5_MM_114	E13.5_MM_115	E13.5_MM_117	E16.5_MM_41	E16.5_MM_42	E16.5_MM_43	E16.5_MM_46	E16.5_MM_62	E16.5_FP_52	E16.5_FP_53	E16.5_FP_56	E16.5_FP_57	E16.5_FP_58	E13.5_SM_1	E13.5_SM_2	E13.5_SM_3	E13.5_SM_5	E13.5_SM_6
Bnc1	E13.5_MM	483.554	429.085	580.07	557.345	553.333	1111.92	1149.59	1206.57	1124.25	1101.22	100.172	159.831	107.819	176.458	190.733	23.6186	21.8096	18.5513	25.4276	50.1598	92.1403	52.9311	70.977	50.6505	47.8198
Pex5l	E13.5_MM	232.02	165.85	238.646	237.248	240.6	1203.93	908.55	827.508	821.408	738.846	284.171	236.809	216.593	213.234	348.567	76.9746	35.4925	54.8694	62.8275	54.8169	41.9042	52.105	45.8441	41.6728	74.5878
Ptx3	E13.5_MM	217.781	188.664	183.904	187.54	155.503	671.307	749.624	710.527	670.932	665.324	100.055	106.818	110.981	96.5896	119.952	151.115	155.921	212.662	158.433	259.148	301.65	348.275	312.576	326.294	408.556
A2m	E13.5_MM	110.509	24.6089	27.3417	19.6744	33.6313	1226.46	1294.58	1420.64	1026.81	1245.26	84.1776	166.281	187.58	524.315	142.233	164.484	385.813	173.273	140.688	284.006	162.276	210.552	195.558	221.634	162.774
Sbspon	E13.5_MM	135.267	184.915	91.5084	149.077	81.5931	369.163	387.312	296.383	423.439	454.222	107.002	88.9287	124.779	111.447	96.8801	110.22	98.1433	74.2052	93.5735	56.4298	98.3421	112.479	104.547	103.078	143.459
Srd5a2	E13.5_MM	522.963	475.058	586.274	560.734	645.242	1056.49	1072.7	1065.07	1208.94	1314.25	25.043	28.8417	38.7663	20.8963	47.4309	0	2.97404	5.30037	3.05131	0	0.885965	0	0.959149	0.888605	0
Zfp831	E13.5_MM	151.244	110.336	169.058	143.148	141.616	555.407	580.018	421.629	458.402	392.602	48.9477	42.0609	60.5723	97.5161	67.6142	22.4939	31.7231	58.3041	40.6841	34.4849	25.693	13.2328	34.5294	26.6582	22.9137
Nrgn	E13.5_MM	288.481	174.977	247.645	197.366	211.058	634.746	792.142	710.113	953.156	881.671	20.4031	19.1465	27.7454	52.0198	15.0735	24.6386	24.6788	26.3897	24.3072	28.0955	13.2332	10.3532	10.506	7.96361	7.93625
Cbln4	E13.5_MM	34.0831	34.7354	48.0807	22.8698	16.8813	371.38	684.44	470.389	473.941	426.053	10.2449	14.4209	26.6518	48.7581	10.0917	3.37408	4.95673	1.32509	6.10262	4.17998	2.65789	17.0136	5.7549	10.6633	5.97748
Pappa2	E13.5_MM	3052.33	1064.11	1341.53	2049.58	1573.64	14980.9	13835.8	10655.9	11751.5	12082.8	4026.75	4379.59	3738.06	4637.75	4782.17	411.825	463.939	395.683	561.434	1632.55	6.8141	34.0509	6.50909	23.6723	8.11301
Scube2	E13.5_VM	1339.07	1041.83	1116.04	1332.81	936.861	653.466	443.517	541.695	501.636	450.252	309.801	217.011	516.005	534.565	248.014	94.2433	149.817	85.2073	85.8006	137.412	16.2568	4.99554	15.2078	7.82738	15.8913
Alx3	E13.5_VM	656.42	732.082	566.302	574.751	358.358	181.543	222.82	201.796	269.31	205.819	162.363	186.109	139.972	110.897	169.851	13.3018	48.7026	44.6048	43.4907	55.1412	29.3102	26.6574	6.98087	5.65901	43.3838
Mpped2	E13.5_VM	935.998	1227.96	596.549	838.458	463.439	329.787	290.569	339.303	259.383	404.875	45.008	62.8767	40.261	65.197	66.0659	49.186	88.5174	63.9118	107.883	42.3889	400.431	187.786	295.645	272.728	362.09
Matn4	E13.5_VM	325.309	502.435	337.273	415.735	457.076	128.496	129.215	90.6881	206.688	167.574	44.1695	37.3025	33.2622	31.6172	24.9808	28.325	14.9938	14.6717	32.7017	13.5442	29.5695	11.4573	19.0203	32.0151	8.48679
Lin7a	E13.5_VM	1439.87	995.89	1419.59	1512.68	1336.78	491.451	714.202	564.149	694.434	717.326	334.046	282.667	297.853	207.437	416.725	67.7717	110.518	110.926	80.0161	118.32	60.5054	66.2728	57.6191	37.7283	93.3108
Sim1	E13.5_VM	1905.56	1852.46	2127.42	2275.47	2289.97	352.882	393.673	374.933	475.228	355.355	388.357	324.005	402.441	304.368	325.772	70.7961	135.264	75.959	72.942	135.929	5.6276	0	6.63047	10.0609	0
Nuak1	E13.5_VM	1270.01	1220.71	2208.86	1499.32	1438.21	507.017	512.454	546.012	991.84	743.923	239.803	366.387	526.207	445.305	424.879	394.271	621.553	287.873	358.228	266.58	403.26	224.787	319.599	263.977	226.27
Slc9a3r1	E13.5_VM	744.503	679.384	583.172	631.884	569.276	317.059	272.447	179.742	272.71	271.124	194.653	201.892	201.1	250.756	214.953	285.672	234.949	272.969	252.242	266.474	116.061	137.054	104.547	118.184	122.538
Rgs6	E13.5_VM	251.857	197.151	223.499	244.304	336.148	62.7738	102.995	91.233	45.001	35.3615	47.6681	81.9889	59.3465	153.102	64.3852	83.8991	65.7141	89.3418	108.307	138.533	26.3221	3.06858	4.19566	15.6311	9.93785
Nkd2	E13.5_VM	2886.59	2682.26	3274.59	3000.95	3270.32	1180.46	1359.05	1278.74	1561.76	1676.72	593.646	519.095	691.061	673.03	626.966	205.4	191.803	136.421	231.236	97.0981	531.997	491.789	395.487	401.431	319.181
Sdc2	E13.5_VM	4871.76	5233.81	5331.53	5690.34	5129.11	1941.15	2186.22	2028.79	2440.41	2512.3	1815.62	1845.87	1915.3	1856.29	1899.25	2000.83	2133.38	1931.99	1930.46	2274.96	699.026	624.776	591.795	605.14	682.428
Nell2	E13.5_VM	1046.71	1221.57	938.861	1353.38	969.84	268.4	212.946	195.22	168.984	186.37	11.5407	14.3989	17.8648	14.4137	21.0338	7.25128	11.1895	8.97396	11.2492	5.77884	701.186	393.84	489.352	552.546	559.812
Runx1	E13.5_VM	1540.41	1672.27	1806.61	2076.32	1759.63	388.973	448.539	472.042	496.879	453.92	932.601	478.106	630.916	885.316	561.491	272.744	240.497	196.513	170.106	208.251	88.7015	131.324	55.7837	64.7202	66.191
Dsc2	E13.5_VM	637.062	1146.41	487.383	1106.44	728.058	19.7105	36.819	39.3655	45.0772	25.42	96.4236	51.7296	36.2765	86.3567	68.9696	93.5342	106.068	47.1937	69.3725	45.9603	24.2232	24.5654	32.9114	15.0239	22.0562
Il33	E13.5_VM	1584.23	2362.72	989.925	1281.66	1042.38	284.461	182.184	133.692	194.412	250.508	163.34	103.471	156.876	51.7575	144.052	348.052	160.492	231.971	206.798	71.6606	47.8918	46.3773	7.91104	5.01471	22.7564
Lef1	E13.5_VM	3836.46	2100.41	2403.36	2571.7	2334.02	999.614	1150.13	1155.81	1175.55	1165.84	873.3	992.254	756.678	1128.16	1528.67	55.6133	47.8301	63.6277	67.1235	43.6907	220.313	108.665	121.782	144.154	108.64
Pitx2	E13.5_VM	2561.89	4375.09	1584.9	2337.58	1627.49	73.4111	114.708	225.968	198.375	127.489	101.352	77.4437	118.764	106.663	79.6876	185.536	261.122	78.7083	127.066	20.7719	128.668	4.39971	29.644	17.6592	9.55003
Dkk2	E13.5_VM	7233.08	11956.1	5803.8	8682.9	7147.37	2872.37	3429.8	3774.59	3089.16	2890.82	2571.46	2696.7	2225.43	1751.81	2630.9	982.982	1323.45	887.812	1615.16	1308.34	1639.92	1656.93	1165.37	1177.4	1494.37
Col24a1	E13.5_VM	5079.32	4965.43	6230.75	6105.8	6497.43	2104.78	2439.68	2139.35	2330.98	2446.25	2407.63	1273.21	1569.46	2165.67	2115.64	290.047	530.182	269.84	534.514	671.214	567.107	603.56	933.063	637.551	1043.1
Gabra4	E13.5_VM	1092.87	1200.63	1061.51	1121.89	1196.45	240.946	333.381	234.973	331.738	411.595	51.0593	67.8621	95.558	70.8919	252.038	22.6032	34.4487	22.4768	27.4629	112.803	135.158	54.3473	28.9334	110.419	63.9136
Gabrb1	E13.5_VM	761.665	776.78	745.493	929.914	1105.39	24.1557	150.239	49.2863	140.144	260.207	136.963	87.1836	37.9856	96.4102	190.962	6.57491	8.95647	12.676	4.32432	16.1055	17.8922	18.0837	31.8141	156.686	128.149
Glcci1	E13.5_VM	961.52	833.56	684.205	577.805	628.827	350.286	277.548	335.911	398.598	367.012	183.32	286.195	247.98	311.818	143.058	228.642	273.419	177.1	379.536	206.794	225.202	301.545	256.828	230.871	222.771
Chl1	E13.5_VM	612.601	741.422	452.172	1302.04	470.872	239.273	173.811	206.85	214.789	236.901	167.144	190.252	138.628	254.523	235.302	315.638	316.95	492.786	240.059	246.431	190.903	242.836	132.094	210.997	129.084
Sytl2	E13.5_VM	1947.91	1662.99	1881.82	2192.99	2328.22	554.608	496.693	1013.37	653.934	479.726	397.337	486.254	509.968	520.487	407.135	980.355	1234.89	993.868	876.545	626.244	607.042	191.295	309.944	240.359	214.805
Ap1s2	E13.5_VM	1715.3	2644.93	1658.4	2418.14	2054.16	855.923	778.595	915.148	898.181	910.485	746.483	721.433	849.56	802.392	667.616	741.718	728.673	675.907	743.334	773.038	740.612	649.941	777.937	600.224	882.61
Irx3	E13.5_VM	2348.55	1875.02	2324.72	2016.84	1998.81	619.257	755.147	671.851	970.093	823.32	176.502	111.085	102.349	139.348	47.1436	57.0119	53.2084	25.0243	36.3939	33.2373	5.28359	11.2737	7.06343	5.60908	6.93148
Bmp5	E13.5_VM	549.452	1226.46	606.23	861.944	864.541	200.627	174.275	314.275	181.196	138.778	52.0326	66.142	61.0257	56.3139	36.7149	222.857	316.379	189.127	299.75	270.02	247.164	116.389	112.738	116.052	51.1145
Itga11	E13.5_VM	1453.13	1104.51	1557.51	1550.43	1336.03	290.874	459.972	410.238	463.03	404.21	120.995	183.829	197.887	173.202	197.14	80.2789	69.2993	20.3024	53.4841	33.0225	81.4458	56.1172	76.4829	61.6106	39.1139
Itgbl1	E13.5_VM	2704.32	2539.99	2956.41	2782.01	3309.35	759.985	1168.37	872.206	1308.35	1516.99	41.5024	42.2525	48.3527	70.878	44.7114	2.49879	9.91137	2.94403	11.2988	3.77949	3.91536	0	1.0655	2.94527	0
Hoxc9	E13.5_VM	581.543	514.902	411.012	463.325	392.022	144.118	150.938	145.323	156.167	178.696	69.4375	80.5165	70.2639	70.8153	80.7334	28.1173	33.7058	42.403	29.496	29.2599	3.54386	5.67119	0.959149	1.77721	0
C530008M17Rik	E13.5_VM	830.911	746.555	969.38	1379.83	1061.59	145.267	235.891	264.36	286.219	231.06	247.732	443.707	248.434	308.967	247.235	135.152	294.613	336.367	354.801	153.101	314.531	235.246	544.02	618.325	514.66
Inpp4b	E13.5_VM	4620.54	4342.62	3654.58	5375.75	5225.32	2073.59	1952.97	1403.96	1742.55	1994.57	2372.13	2480.43	1973.21	1874.63	2221.06	1583.74	1630.09	1843.34	1409.85	1624.97	1116.66	715.394	1113.12	235.176	586.267
Slc24a2	E13.5_VM	1267.78	1096.29	1093.41	1189.63	1078.36	400.216	355.368	280.774	354.322	416.679	35.021	57.8483	98.5141	87.9589	51.852	56.1389	18.0944	62.3186	28.132	54.0986	26.261	5.46287	8.08845	10.3036	15.4184
Hoxa9	E13.5_VM	1827.83	1711.56	1690.22	1465.34	1279.71	425.196	402.941	607.603	417.868	416.478	116.914	101.94	149.418	199.303	135.325	629.764	510.312	550.198	466.028	670.177	0.754285	2.96477	3.5797	0	5.73998
Necab1	E13.5_VM	1172.15	1016.74	1226.06	1120.74	1287.89	320.396	424.712	439.712	511.706	592.657	139.345	120.625	83.8614	180.023	159.168	133.098	127.626	91.9859	130.885	111.956	52.8973	73.9729	105.011	72.2777	74.1366
Slc19a2	E13.5_VM	659.412	1148.98	1020.71	1227.34	1308.52	342.355	421.421	320.826	387.801	492.359	401.432	504.396	388.472	309.307	357.292	500.56	341.026	492.482	501.815	474.798	567.926	478.456	442.963	391.481	513.157
Ptchd4	E13.5_VM	401.335	443.865	373.414	642.481	452.644	162.615	211.722	124.733	166.844	135.309	192.861	173.19	155.856	165.263	223.677	43.6631	52.2738	60.9795	53.7458	61.9267	10.9707	15.8842	26.0592	26.4099	18.1475
Shroom2	E13.5_VM	2828.39	2856.1	2761.48	3513.23	3300.34	1285.79	1515.47	1339.11	1315.03	1262.14	1072.98	973.736	1048.07	914.598	1192.66	759.981	973.549	865.51	768.701	859.388	985.32	753.754	1151.61	869.229	933.624
Spsb4	E13.5_VM	337.595	235.109	292.204	286.236	292.72	123.401	107.574	129.04	146.855	120.353	80.5543	87.8595	78.8357	109.481	111.454	171.77	179.778	143.675	111.044	87.2549	119.893	80.9965	83.912	141.495	87.0142
Lix1	E13.5_VM	11156.5	10959.6	11918.6	11679.5	12771.5	4105.01	4972.16	4632.41	6350.37	6783.94	354.706	280.26	756.776	961.859	260.804	307.93	280.45	316.762	349.638	246.275	1011.77	992.882	857.575	820.154	1015.9
Bex4	E13.5_VM	919.179	1089.06	984.103	819.078	990.371	232.805	447.117	456.048	559.406	487.672	59.1926	75.7096	77.5326	48.7581	75.6876	139.462	100.126	116.608	157.651	95.0947	337.553	315.696	231.155	201.713	226.148
Scg2	E13.5_VM	599.901	685.358	346.604	653.212	319.322	227.123	195.563	225.299	219.72	234.928	48.7579	41.2478	53.9712	44.3655	43.2259	40.7479	22.6842	20.2141	19.3947	27.8972	219.425	217.682	154.501	189.944	271.145
Pgbd5	E13.5_VM	1209.82	1227.93	1355.87	1344.65	1318.06	566.136	571.477	552.366	624.972	701.776	501.361	489.983	579.298	508.174	885.999	86.3833	80.4033	79.3239	80.4343	74.6793	126.505	117.794	316.429	203.123	165.939
Meioc	E13.5_VM	214.007	237.124	160.863	345.624	191.979	68.8568	86.3672	143.816	114.867	89.3288	48.795	53.6162	111.278	65.2892	45.9073	116.1	67.6449	40.5723	68.5127	99.6452	78.2804	75.2454	103.645	55.9702	81.0522
Cntn2	E13.5_VM	365.15	321.477	505.663	489.867	758.92	146.166	171.376	245.934	222.533	136.883	37.1938	40.2824	48.8749	63.9577	25.4108	38.4451	32.5483	36.6489	54.7401	82.0753	42.9887	33.9608	30.0881	46.5603	58.3887
En1	E13.5_VM	728.527	763.158	751.455	687.788	725.897	134.14	129.104	210.337	211.331	191.02	37.5645	26.4383	37.5549	53.4017	29.2659	71.9804	74.351	30.4771	76.2828	25.0799	0.885965	0.945199	2.87745	2.66582	2.98874
Zfp462	E13.5_VM	7723.67	5147.06	4761.45	6462.19	4958.33	2137.06	2392.92	2580.22	1920.32	1638.46	2070.91	2323.67	1255.76	1197.99	1006.68	810.115	1327.33	1124.76	1230.9	1814.88	3075.83	712.377	1660.64	1592.3	2860.18
Cdh3	E13.5_VM	980.955	1405.76	687.088	795.361	429.536	256.086	334.151	328.89	275.818	221.829	188.961	85.3235	49.6693	119.573	153.393	26.9927	12.8875	11.9258	15.2566	17.7649	72.6491	26.4656	43.1617	39.0986	41.8423
Ctnna2	E13.5_VM	7658.05	9755.19	6942.82	9337.74	7933	837.549	1348.13	1163.24	1859.37	1495.39	54.7869	29.9629	96.9088	81.5923	89.3379	27.6223	34.5211	24.6477	36.5318	22.3837	555.075	602.507	575.988	521.673	644.286
Gpr88	E13.5_VM	1228.08	1888.76	2779.69	1473.83	2561.76	513.513	961.272	696.053	777.763	870.779	46.6162	50.307	63.9429	75.0094	85.4096	4.09406	14.4346	8.44121	11.1073	14.2648	66.1136	68.8135	83.7949	123.44	91.5689
Apela	E13.5_VM	1517.88	1267	1416.83	1183.57	1432.4	460.978	468.219	443.1	478.827	545.68	74.5591	135.959	129.844	129.79	240.363	0	0	1.37172	1.00939	8.29654	14.0679	17.8225	10.4706	16.5577	12.3756
Cdh4	E13.5_SM	188.988	73.4714	223.771	63.8675	85.2998	491.955	70.9464	223.105	109.559	76.3392	54.9705	69.0223	58.4989	60.4012	46.6245	91.3633	120.919	142.225	102.976	60.0984	490.688	375.86	1007.59	769.711	497.679
Cttnbp2	E13.5_SM	299.988	226.849	273.323	318.084	301.847	823.408	531.34	484.04	601.695	441.458	741.535	728.118	599.515	714.609	558.013	489.614	578.202	543.938	355.153	424.755	1604.05	1272.89	2007.5	1869.85	2034.15
Kcnn3	E13.5_SM	124.329	116.063	106.765	125.111	102.902	226.711	290.72	325.902	226.258	223.838	354.194	358.918	357.892	458.04	331.454	402.786	563.052	306.277	453.943	408.599	1199.13	875.376	1138.54	1349.77	1154.08
Pcbp3	E13.5_SM	389.585	166.813	265.29	248.304	152.03	183.217	289.925	244.657	227.997	180.829	320.12	168.554	236.867	237.059	284.398	142.85	181.889	193.093	121.312	292.323	926.463	643.536	877.014	881.777	831.781
Mxd1	E13.5_SM	283.693	366.136	270.007	284.303	283.388	338.92	313.15	321.503	318.853	256.252	339.529	355.796	425.424	369.581	423.231	303.14	334.567	252.543	286.26	295.166	765.823	727.844	755.72	1033.64	688.029
Efnb2	E13.5_SM	1583.57	2049.78	1419.22	1915.97	981.54	1060.9	1598.08	2405.63	1690.38	1023.37	2028.72	2315.55	1757.05	1357.3	2918.82	714.049	932.426	645.705	470.382	542.731	9707.54	6425.12	8939.02	10367.8	7032.54
Pax9	E13.5_SM	136.872	104.661	131.362	132.118	142.492	22.8618	19.3711	13.1733	12.5868	17.3169	42.1602	10.6366	30.9019	38.8646	28.7444	10.1224	25.4385	11.926	19.4743	21.132	578.78	630.929	312.989	381.878	333.055
Tulp3	E13.5_SM	682.594	520.385	646.535	1016.06	847.592	585.75	602.966	561.388	667.099	692.248	707.645	895.367	646.194	827.806	744.477	731.831	1072.29	704.091	825.592	567.74	1720.81	1699.09	1854.25	2949.47	2223.44
Folh1	E13.5_SM	0.806585	8.69168	0	0	2.70305	2.13011	17.3682	3.62012	2.35351	1.6914	142.236	113.758	125.903	158.365	59.61	86.0234	122.657	131.349	124.808	230.918	247.39	301.138	247.453	331.406	422.28
Gria3	E13.5_SM	497.598	570.413	538.31	716.87	508.535	1158.16	1226.15	986.146	899.6	770.481	1339.18	1137.03	1045.94	896.36	1489.6	453.865	739.149	443.289	430.299	554.01	5239.58	4921.6	6228.7	5595.12	6977.74
Zim1	E13.5_SM	13083.5	11422.7	12637.3	16688.8	13571.7	8296.05	10019.5	8597.95	8855.99	8971.78	8307.86	7747.08	7332.49	6175.95	8493.78	12748.1	15540.2	9792.6	10707.4	8531.32	29397.3	29011.8	32184.7	34287.2	32371.7
Ikzf4	E13.5_SM	66.9851	74.9284	153.866	105.498	43.9203	107.136	60.4854	78.6889	126.356	26.7487	89.5571	206.904	179.023	59.601	138.39	287.801	80.0942	14.7931	13.7615	30.8738	489.162	287.586	405.039	446.08	290.058
Lamb1	E13.5_SM	9197.65	10201.7	9518.4	9687.98	9531.9	8303.84	11161.8	9862.72	10024.1	9182.22	9661.9	10309.2	9524.72	8795.38	10324.8	11742.3	14092	12928.9	11631.7	11005.7	35416.8	31372.2	36382.9	40375.6	33201.9
Slc2a3	E13.5_SM	413.355	484.974	436.822	358.405	495.068	604.624	486.7	699.103	668.651	622.889	449.28	693.622	441.055	490.835	734.077	724.754	315.021	499.454	557.887	467.413	1411.37	1590.8	1692.42	947.912	2430.91
Dvl3	E13.5_SM	602.093	476.494	509.678	783.02	450.733	463.246	370.86	526.494	349.57	308.64	572.106	555.402	513.955	569.049	662.064	561.133	801.45	403.891	362.874	422.684	1046.87	808.156	1153.35	1694.11	1190.78
Dlgap1	E13.5_SM	169.378	132.082	126.436	173.3	133.535	79.3396	75.4115	101.521	90.2878	85.6028	64.6179	50.662	51.1049	84.923	214.369	174.762	172.504	87.2402	96.7236	46.8811	512.644	454.073	377.628	401.594	442.813
Cacna1b	E13.5_SM	43.2095	132.045	79.1411	68.8207	56.6779	89.6819	69.5919	66.7422	62.1789	73.5901	432.818	40.9434	39.2368	56.0917	51.6422	28.7081	63.6915	31.3136	66.9671	39.8757	519.263	260.513	347.238	693.602	425.377
Kifc2	E13.5_SM	58.1592	90.1014	73.0389	57.8789	73.2569	178.54	136.508	103.212	101.01	102.429	145.751	137.603	115.019	225.554	64.5981	49.2742	49.6699	54.8436	41.4579	61.1027	239.128	331.083	300.056	356.392	387.92
Clcn5	E13.5_SM	4848.75	4223.79	4047.03	4434.34	4671.31	5799.77	4883.11	5272.7	4756.2	5018.1	6627.42	6335.14	4824.95	4466.09	5041.31	5126.63	7098.58	6209.48	5872.26	5429.93	16236.8	14287.1	14559	13603	15154.9
Rasa4	E13.5_SM	182.596	242.142	149.028	169.864	105.111	219.011	168.332	119.63	133.539	156.133	284.718	188.182	307.931	288.273	212.053	162.375	222.525	273.896	246.556	201.23	520.96	674.709	688.203	749.444	658.409
Il27ra	E13.5_SM	68.3048	70.4807	50.5065	52.2297	66.299	107.428	73.0614	58.9625	90.6216	68.6083	96.8107	116.599	97.0204	101.233	98.7651	78.6537	92.2381	104.298	106.021	125.173	239.542	343.501	359.672	303.545	345.368
Por	E13.5_SM	1509.84	1075.48	1135.33	1097.81	945.291	1126.65	1216.3	1348.87	1226.86	965.236	907.282	751.563	1105.48	971.839	771.323	785.95	912.074	1033.73	828.495	948.535	2876.54	2533.12	2751.4	3409.25	2343.43
Insrr	E13.5_SM	21.0974	23.9929	14.7108	14.0218	12.7274	13.1934	17.4413	33.0325	26.613	31.6212	13.076	6.35638	1.60193	25.0907	10.2045	21.9765	7.25104	28.1714	33.4715	21.0441	466.082	488.202	552.503	677.599	536.979
Rundc3a	E13.5_SM	37.336	13.8207	23.1795	24.9274	16.7538	17.6989	21.5795	25.319	14.4515	26.6543	28.6204	36.4513	14.3803	9.94357	79.1211	38.9274	21.3837	18.5947	10.7138	15.8276	346.912	336.39	405.775	722.403	530.444
Aplp1	E13.5_SM	109.459	276.199	79.6971	74.9646	63.9464	210.569	233.826	259.987	172.481	161.427	322.317	320.894	263.177	266.818	408.936	57.298	125.978	27.9341	72.153	56.2414	875.468	901.924	1113.54	1234.91	1042.03
Gabrb2	E13.5_SM	47.9784	20.9471	29.5396	25.2559	34.738	61.4051	61.0505	66.6672	49.8548	84.9852	119.162	72.7949	42.1992	62.7555	39.3743	39.4857	46.7091	60.5589	69.1713	81.7934	294.72	538.05	425.259	283.264	315.251
Zmiz1	E13.5_SM	1241.74	1109.07	1275.05	1922.96	952.728	968.96	911.662	1114.08	830.886	738.822	2002.03	1699.01	1305.22	1726.09	1839.44	1147.5	1938.03	949.834	914.466	1165.39	4177.75	2696.74	4201.78	5818.94	4209.37
Elavl2	E13.5_SM	44.4581	67.8069	60.582	73.2385	31.448	61.8403	36.191	86.5288	22.5556	21.4813	100.405	6.85293	18.0035	67.6415	31.5656	77.5023	30.7148	33.6687	23.3521	51.9329	588.058	654.54	658.975	790.768	881.299
Bmp7	E13.5_SM	197.281	191.243	169	166.904	192.192	262.134	344.181	399.576	371.257	342.424	355.703	351.646	286.613	561.913	561.68	241.562	294.552	253.272	249.519	269.746	1968.2	1939.95	2111.97	2361.11	2008.49
Trpm5	E13.5_SM	628.576	1171.01	636.02	753.497	607.486	1202.76	1173.25	1128.78	1024.59	993.413	374.129	433.201	414.771	667.86	460.897	586.289	754.914	342.699	618.962	486.32	2435.49	2915.95	3023.07	2956.04	2822.42
Tmem86a	E13.5_SM	112.9	117.488	100.814	118.584	110.667	145.226	123.408	103.256	104.889	148.766	165.056	176.656	140.528	134.665	162.476	169.829	171.503	132.509	171.891	201.684	451.842	451.805	461.351	489.621	468.236
Ebf3	E13.5_SM	1616.42	2033.94	1095.08	1266.21	1327.71	790.95	991.686	1320.08	753.44	675.424	1054.31	912.718	937.89	899.014	1147.01	1987.82	2663.19	2169.62	2082.19	2399.96	4472.3	3589.92	5107.02	5428.79	4338.48
Gabra1	E13.5_SM	19.4229	54.7141	25.3864	22.2999	28.0661	71.536	124.882	72.6442	110.771	108.472	43.7442	107.912	16.6483	37.5797	53.6399	23.6755	46.1318	26.7559	60.81	41.5885	1778.01	2160.92	1579.06	1852.42	1559.93
Phox2b	E13.5_SM	10.6418	0.681478	5.13947	0	6.21552	22.7648	1.88603	2.551	2.58015	0.587186	4.53953	5.59406	12.8773	27.6942	4.68316	0.750226	2.64511	12.9779	22.2575	15.5433	859.105	777.939	852.734	758.744	983.364
Aldh1a2	E13.5_SM	10.651	20.4326	12.4079	11.8584	14.0678	48.7782	54.1097	91.7832	51.2789	58.0981	13.6598	10.8157	23.0175	17.4136	14.1283	312.665	271.629	141.785	240.036	181.829	2531.2	2556.76	2216.59	1945.16	2183.77
Mertk	E13.5_SM	563.815	742.719	562.552	648.877	566.688	536.194	631.536	594.41	479.06	498.325	582.486	566.922	625.141	541.895	618.255	499.3	511.147	457.979	481.841	479.451	1785.48	1862.36	2255.96	2271.79	1978.21
Map2	E13.5_SM	544.022	289.473	519.974	438.425	604.147	393.641	424.853	641.455	500.945	541.322	898.132	1119.13	1037.87	808.41	1298.26	860.656	959.961	655.833	581.016	666.452	2055.14	2090.22	2150.89	2017.19	2294.91
Serac1	E13.5_SM	159.367	261.516	209.83	319.36	216.624	263.714	276.575	226.028	214.372	213.327	210.504	182.007	179.57	170.428	229.479	220.278	201.76	253.677	234.645	220.394	637.693	474.007	636.948	754.495	736.988
Cd46	E13.5_SM	125.575	152.695	76.2923	138.326	111.613	159.497	123.502	118.39	119.128	119.75	172.042	180.773	137.935	89.2366	194.934	118.252	75.9035	91.7985	93.1138	120.234	280.453	262.515	594.323	450.051	466.705
Scube1	E13.5_SM	1199.79	1236.78	1102.88	1263.73	872.618	1294.95	1474.13	2094.49	1186.04	1111.22	214.555	206.171	242.503	385.558	389.61	61.9524	158.833	215.285	113.743	215.982	6746.54	6547.94	8017.5	8967.43	6171.43
Rarb	E13.5_SM	260.27	373.628	272.095	229.341	234.728	856.539	620.396	608.174	679.462	679.414	407.357	335.427	441.361	491.908	378.388	247.831	228.682	177.968	262.795	189.14	3214.3	3701.78	3812.75	3679.89	3591.84
Rab11fip4	E13.5_SM	713.461	621.335	715.485	458.787	541.253	368.069	443.422	346.107	494.908	379.987	205.755	84.2012	53.5561	80.3719	155.513	22.5151	20.6726	29.8428	34.7839	36.6094	1410.29	1341.8	1734.14	1817.5	1140.41
Kdm6b	E13.5_SM	361.056	547.371	481.22	747.98	511.713	542.571	441.077	366.268	379.414	345.088	687.954	514.146	649.867	549.032	611.396	469.114	729.562	360.595	349.316	408.202	1047.58	735.574	1236.37	1907.96	1272.32
Adora2b	E13.5_SM	146.983	203.305	124.079	173.641	166.938	133.032	118.662	90.8272	141.405	158.449	73.9908	82.92	92.07	96.3552	95.8709	109.095	122.927	76.8554	94.5906	57.4748	315.403	500.955	329.947	291.463	418.423
Dnah1	E13.5_SM	156.494	204.01	142.796	172.94	135.914	364.64	429.658	355.594	264.653	275.7	338.826	448.994	347.936	267.333	442.955	115.078	113.668	117.662	105.131	131.115	750.865	970.152	931.736	896.968	768.974
Scrn1	E13.5_SM	170.491	321.716	135.249	176.437	187.911	181.492	202.521	171.134	246.031	248.677	111.672	240.219	246.554	213.852	118.786	152.81	208.394	194.774	380.34	144.288	847.355	674.13	916.902	628.898	644.608
Syne4	E13.5_SM	61.0498	116.974	84.5074	70.9814	156.432	162.555	111.572	140.13	146.339	179.49	48.0517	59.5504	21.5834	36.0237	34.3326	36.5756	20.8637	28.4998	30.0237	32.7373	371.308	538.957	715.823	514.903	479.145
Vip	E13.5_SM	11.894	0.739713	4.80889	1.09301	1.35811	1.43054	1.37467	0	4.25538	1.77328	2.4726	0	6.25303	1.68111	0	0	0.717785	7.0486	11.9727	8.17453	862.815	1056.98	880.36	812.77	1387.67
Frk	E13.5_SM	338.548	347.823	237.407	169.229	192.947	137.41	247.401	210.077	195.354	204.741	218.272	341.488	232.283	212.538	413.079	343.317	317.943	218.274	604.774	195.831	987.057	1281.58	1113.65	1084.52	1092.79
Plagl1	E13.5_SM	11195.2	10254.8	10790.1	11884.5	9459.34	21912.7	22369.6	23266.4	19417.4	16263.6	23557.6	22962.6	19882.1	20750.5	25456.8	28357	37007.4	23973.2	22004.2	27112.5	69352.3	62317.9	81901.7	90420.4	79067.7
Rev3l	E13.5_SM	6366.06	6540.93	6511.3	8549.66	7179.51	8360.47	8767.37	8512.48	7454.29	8064.31	6176.23	5282.66	6174.37	4913.03	5772.85	6394.13	6787.88	5452.56	5323.81	5569.55	23139.8	17304.4	27002.1	22800.6	24635.5
Arfgef3	E13.5_SM	67.3788	35.344	56.7237	38.5133	46.3509	133.686	105.093	128.524	109.053	106.153	79.8871	120.802	82.6242	122.782	87.7809	194.548	296.908	106.093	174.932	100.194	759.258	411.432	585.907	549.841	746.431
Ptprk	E13.5_SM	1275.25	1477.96	1042.15	1202.54	1036.56	947.189	1020.25	1087.31	882.143	998.269	1546.59	1462.96	1186.68	906.832	1201.94	1092.75	1176.68	1129.74	1260.98	1150.06	2524.44	2675.57	2699.45	2452.19	2997.95
Igf1	E13.5_SM	2239.9	4298.05	1644.3	1535.83	1184.15	4398.86	4386.53	6049.02	3941.06	3698.74	9125.55	10658.1	8521.85	7877.76	12998.1	11255.1	11233.7	7564.99	10409.2	6807.84	23350.1	20829.6	21995.3	21142.3	20787.7
Apc2	E13.5_SM	78.6622	73.1097	111.522	73.3012	141.89	127.177	163.407	184.345	199.84	113.991	192.327	177.875	96.9001	96.4855	134.454	39.9043	44.9744	51.0942	44.7655	62.7756	1116.09	725.17	914.623	852.228	882.38
Rab36	E13.5_SM	157.613	176.891	226.934	186.044	176.549	126.186	180.633	167.727	124.63	94.542	152.697	134.128	175.05	197.715	178.527	107.101	144.332	45.4407	58.1077	57.1614	363.49	417.65	439.164	494.317	452.162
Adora2a	E13.5_SM	92.9925	111.713	141.988	96.0962	135.417	127.031	106.217	133.693	106.692	69.3941	61.7541	72.3253	116.686	105.266	97.5191	79.1287	71.4275	74.133	140.28	82.7291	341.119	297.496	372.63	411.085	320.745
Phlda1	E13.5_SM	141.914	146.086	143.191	166.503	100.272	123.522	107.32	135.819	100.826	172.006	114.721	104.215	125.005	94.442	160.948	182.414	159.127	136.729	113.707	150.938	358.927	292.757	234.566	334.768	317.081
Rnf144a	E13.5_SM	2225.55	2216.39	1945.29	1851.6	1937.63	2722.32	2670.37	2549.61	2327.23	2263.16	2437.33	2304.54	2992.42	2318.14	2440.93	2521.29	2674.92	2792.55	2388.97	2928.58	5705.68	6484.56	6390.76	6681.64	6613.55
Ccl11	E13.5_SM	33.018	41.8869	15.5099	18.6347	20.6327	69.8416	55.059	139.587	50.5019	44.0137	192.376	201.892	212.003	175.297	87.7976	365.525	322.187	393.553	324.456	326.039	528.035	1319.5	761.564	607.806	884.666
Ern1	E13.5_SM	319.289	293.541	299.77	320.254	220.233	294.104	278.327	267.253	240.938	235.761	506.243	524.15	386.306	402.54	404.677	399.024	534.363	348.745	377.44	463.619	958.014	756.823	822.284	1180.33	926.649
Doc2b	E13.5_SM	233.256	256.429	220.241	277.826	190.384	263.846	257.258	277.262	270.379	281.688	64.8842	104.551	98.1272	100.999	118.073	14.621	33.7058	26.5019	9.15393	24.0349	1072.02	959.377	1082.88	1476.86	1076.94
Rtn1	E13.5_SM	30.2986	9.05393	25.6285	11.5988	33.1903	10.5804	13.59	20.97	15.4522	15.6024	82.8831	50.1661	45.9334	67.5998	55.7248	29.1352	78.0847	77.019	37.5023	55.566	535.917	789.881	512.271	541.673	888.048
Mtr	E13.5_SM	1475.78	1732.58	1674.77	1651.33	1653.09	1558.9	1655.74	1747.69	1663.14	1461.44	1447.34	1481.19	1287.23	1209.54	1355.77	1544.83	2215.27	1545.19	1585.21	1479.36	3338.03	2955.64	3329.04	3747.71	3505.4
Gcnt2	E13.5_SM	47.2269	37.0482	115.639	51.9778	154.235	66.0901	163.408	202.717	156.446	53.651	228.603	399.397	125.137	217.299	290.68	115.618	327.771	157.942	190.842	106.169	634.964	449.331	954.405	518.803	669.044
Hivep1	E13.5_SM	995.457	903.504	792.572	1332.35	684.91	695.28	770.974	801.323	747.722	822.839	952.894	875.286	754.922	950.565	1059.53	897.415	1232.81	827.188	981.971	1023.43	2314.84	2217.62	2209.19	3085.31	2518.63
Barx1	E13.5_SM	3.19529	8.17305	9.30594	3.38812	2.81356	0	0.949293	2.86823	3.10781	2.64082	0	0	1.21145	0	0	2.24939	0	2.65019	0	2.08999	2289.33	2670.19	2431.44	2839.09	2308.3
Pitx1	E13.5_SM	601.83	681.363	367.945	434.991	271.736	17.6716	16.9125	20.6193	23.313	27.2387	5.33689	10.1416	2.2719	7.6199	6.62392	6.32761	9.29564	6.21256	10.4909	3.91948	4319.36	4364.43	4371.4	7805.29	4021.32
Tert	E13.5_SM	185.871	200.801	333.61	245.12	265.851	263.76	280.37	273.091	171.289	254.024	208.884	285.54	171.402	234.302	168.361	64.8991	84.1451	48.2419	128.247	170.848	689.684	386.402	560.026	841.807	499.618
Rnf180	E13.5_SM	91.1805	124.175	99.8597	78.1882	63.4812	52.2615	96.59	118.734	65.965	84.1976	106.203	115.769	95.7418	94.8645	116.65	47.5314	78.4792	89.9433	97.1952	111.154	220.86	237.804	260.241	297.296	213.502
Fgf10	E13.5_SM	134.731	71.0733	77.688	91.9254	72.2044	212.86	249.194	226.143	207.715	209.193	936.433	933.011	835.956	696.946	855.989	1181.99	1703.3	1503.15	1182.22	1753.25	4571.06	4239.12	4975.15	5721.42	4859.59
BC067074	E13.5_SM	863.108	820.396	842.014	977.836	843.887	799.831	1024.82	1153.48	954.379	936.838	959.517	895.34	601.12	632.406	1051.33	849.409	1004.86	697.4	715.488	647.823	2465.54	2210.04	2760.58	3049.38	2834.99
Tsc22d1	E13.5_SM	5749.47	8537.24	6962.95	7733.62	7592.62	6615.33	6582.72	5185.54	7080.21	7316.54	6933.09	7258.16	7644.01	6418.63	7731.6	6520.04	5982.59	5464.84	5307.88	5947.84	23905.1	30579.9	27081.6	25285.5	26912.3
Nefm	E13.5_SM	46.8212	46.1915	52.3137	9.38598	31.3998	12.0592	34.2116	23.9616	30.3502	22.169	20.1863	12.1059	12.0729	27.5163	16.1222	27.1915	23.825	19.883	44.0577	39.7675	455.229	407.84	383.061	677.231	405.305
Nefl	E13.5_SM	204.499	371.874	320.279	147.383	213.83	130.814	131.002	155.84	185.692	191.9	35.2879	39.6574	39.9777	51.0799	48.44	96.7237	85.2558	64.9296	101.71	119.13	2198.08	2508.56	2015.17	1880.29	1854.01
Slc7a8	E13.5_SM	126.855	117.266	82.5482	155.228	65.7125	52.344	101.311	103.934	73.1475	54.019	226.629	191.149	194.95	181.532	223.862	174.829	266.59	211.82	156.313	239.567	544.7	493.993	693.165	888.842	623.038
Carmil3	E13.5_SM	121.673	211.977	200.664	239.257	239.659	119.909	166.673	258.297	180.999	163.055	144.34	214.816	128.282	57.7514	126.195	106.218	115.918	81.5868	153.194	179.97	752.985	1080.72	1235.6	1380.66	951.273
Slc38a2	E13.5_SM	5516.76	6709.01	5741.8	7851.1	6871.47	5044.43	5890.96	4687.3	4886	5346.38	5972.99	6048.83	5929.59	4974.36	5930.53	5944.49	6547.6	5156.69	4736.21	4752.14	13642.3	11900.5	14062.3	14092.5	13619.8
Crebbp	E13.5_SM	2921.01	3131.5	2559.88	4416.15	3400.76	2523.95	3814.1	2634.04	2962.06	2011.84	3600.3	3228.57	4215.23	2867.71	4113.05	3518.13	5158.63	3549.86	2184.11	2812.57	9214.82	3622.01	8174.5	12206.8	8811.96
Rhpn1	E13.5_SM	45.2932	75.0865	48.4692	26.585	52.4276	52.2667	39.0311	81.8395	91.7678	40.5765	44.8545	25.2614	14.9188	39.231	12.7542	67.9971	72.7738	58.1787	104.939	95.9097	378.695	375.508	411.154	510.754	373.921
Mapk8ip2	E13.5_SM	111.731	154.539	76.2129	21.0332	135.115	30.6873	88.5361	93.2507	30.6791	139.726	8.34091	23.9304	3.94522	51.9054	68.8993	66.2729	6.05331	9.70947	74.9395	22.0854	601.809	885.178	505.652	475.224	520.442
Kif21a	E13.5_SM	214.365	201.232	186.628	290.405	214.391	226.117	342.846	216.059	208.003	325.661	282.319	383.389	161.549	141.098	545.914	338.451	221.598	423.311	237.429	310.558	957.845	720.666	794.865	1165.15	967.376
Tagln3	E13.5_SM	87.338	99.0982	70.57	71.9975	58.1468	42.1267	51.2618	54.4963	46.6171	44.894	37.5645	37.2539	33.9205	37.149	42.385	5.62347	10.9048	6.62547	11.1881	12.54	418.175	422.504	377.905	348.333	441.337
Crybg3	E13.5_SM	1371.77	2149.55	1590.63	1538.67	1383.08	1842.53	2016.99	1314.31	1367.4	1227.73	2313.36	2885.13	2581.58	1701.02	1874.34	3713.95	2728.9	2498.92	2421.93	3014.41	6262.74	5537.04	5590.76	7403.3	5477.3
Itgb5	E13.5_SM	3033.26	2762.73	2766.83	2506.91	2344.44	3242.04	3289.13	4032.55	2803.94	2931.46	3837.7	3752.86	4352.59	4192.66	4576.92	1781.47	1950.22	1892.07	2146.21	1917.99	6846.25	10164.6	8622.89	10728	8988.94
Adamts1	E13.5_SM	2087.51	3244.01	2093.69	2551.04	1905.55	2459	2367.69	2303.88	2153.25	1854.05	4323.05	4315.13	4998.99	4304.36	4208.97	2905.73	2949.53	2513.13	2814.27	3201.66	14690.4	17052	17389.2	18763.8	16241.3
Cers5	E13.5_SM	1348.29	1621.92	1563.72	1454.96	1672.31	1565.56	1577.73	1498.76	1645.36	1729.63	1439.69	1389.6	1641.35	1372.06	1522.28	1528.08	1401.82	1384.05	1341.12	1378.34	3870.03	5032.02	4885.68	4400.35	4579.49
Cxcl13	E13.5_SM	11.7161	18.3894	10.0814	11.0114	6.56496	101.991	61.704	79.3543	48.948	29.9293	147.982	176.656	214.426	161.366	192.751	83.2273	94.1779	31.8022	112.898	52.2498	673.333	1513.26	854.602	727.768	1074.95
Serinc2	E13.5_SM	87.0242	107.786	119.603	67.8325	70.7962	178.052	219.726	247.701	211.043	188.102	163.094	245.272	141.385	130.91	181.693	119.49	209.97	118.552	122.277	56.6496	651.765	673.894	645.726	633.399	623.728
Prph	E13.5_SM	49.8215	59.0778	33.3671	49.7856	23.9814	140.25	112.718	180.632	85.3762	81.5107	12.4537	22.4309	20.9851	12.8635	6.88133	9.22846	23.3311	19.8779	41.4105	25.7235	303.313	627.429	230.117	306.876	457.831
Flywch2	E13.5_SM	70.4955	126.016	73.8977	75.3104	80.8837	150.084	164.806	137.227	169.359	153.353	159.964	160.284	150.645	164.864	213.346	63.8335	85.7078	106.439	95.2227	91.1722	388.991	486.564	419.981	378.516	458.724
Slc25a27	E13.5_SM	185.753	260.479	212.337	171.12	257.935	168.682	223.272	170.546	221.168	164.11	124.374	136.979	144.073	119.947	111.991	123.59	103.404	118.559	78.6995	90.0998	470.195	570.099	634.058	495.962	584.262
Cacna1h	E13.5_SM	433.483	488.52	671.398	686.636	671.051	419.288	419.408	447.414	409.753	423.831	462.748	464.351	303.829	478.51	394.011	253.738	399.524	241.201	283.244	137.595	1608.96	1717.66	2181.76	2699.85	1877.69
Tmx3	E13.5_SM	2648.51	2960.4	2256.33	2701.71	3020.77	2858.44	3126.2	2847.31	2674.42	2896.98	2752.2	3223.66	3361.66	2597.7	3612.14	3484.63	3142.89	2397.92	2792.18	3383.59	7440.26	8347.32	7926.34	7894.19	9759.81
Pcsk5	E13.5_SM	704.102	1080.53	476.98	723.015	483.35	728.299	557.712	692.301	527.197	511.067	1135.15	1284.85	1065.06	1011.67	1157.36	1260.02	1615.92	1745.6	1258.62	1629.42	3574.52	3880.31	4540.69	4575.89	3987.32
Syt7	E13.5_SM	59.9876	89.9056	28.8134	198.624	150.186	85.0398	30.8023	162.544	37.2875	16.9783	44.1846	29.4262	73.855	110.932	131.102	14.9198	32.5966	77.792	25.5831	29.7646	1025.55	828.085	193.673	786.211	962.599
Chka	E13.5_SM	619.462	724.2	805.025	1021.2	698.759	572.109	556.274	575.194	666.877	713.336	1046.89	687.443	502.065	543.567	735.024	497.518	1022.77	466.931	729.809	492.395	2683.46	1946.55	3262.89	3706.42	3655.96
Hspa12a	E13.5_SM	144.628	136.254	145.759	165.315	99.5871	126.219	155.837	222.691	134.104	137.957	152.233	244.017	114.777	178.212	215.281	322.449	259.138	344.114	231.801	312.35	896.188	951.089	1114.38	1190.64	1149.2
Sema4g	E13.5_SM	183.983	217.706	215.346	245.193	167.945	167.382	229.318	255.213	171.751	111.862	103.831	111.161	70.6374	96.3675	125.884	61.2419	121.788	91.8361	112.408	111.24	785.863	689.451	963.647	1225.76	744.112
Itgb8	E13.5_SM	67.6418	188.46	101.353	93.1241	111.645	95.6998	94.1444	99.8481	92.5626	89.4966	284.012	199.651	123.411	257	169.295	420.693	338.192	397.421	428.989	170.136	1860	1828.68	2084.95	1679.1	2032.79
Gdf11	E13.5_SM	927.7	952.16	863.901	758.939	858.134	773.8	859.11	769.641	731.112	790.486	704.62	713.833	604.512	594.384	644.858	489.242	550.197	647.971	620.433	726.272	1597.39	2380.01	1921.18	1701.68	1838.07
Rnf165	E13.5_SM	56.847	21.1655	89.5052	59.9398	22.9045	51.6378	53.5343	41.8839	25.3534	57.1726	152.776	84.1998	94.6529	85.2253	24.6069	34.3907	182.222	116.824	92.2111	100.373	333.484	86.3471	237.767	254.09	420.907
Ptdss2	E13.5_SM	291.587	362.976	434.91	315.726	317.534	189.674	276.316	314.961	232.487	292.63	305.235	243.208	258.371	362.204	415.564	308.873	452.391	218.554	353.288	259.18	1106.62	413.113	660.625	972.578	631.974
Cnksr2	E13.5_SM	157.133	143.917	127.241	141.439	127.662	85.7641	92.8593	113.698	56.6863	74.291	74.4665	46.3344	40.0793	77.4988	74.016	38.7679	62.6247	53.1688	52.0731	32.3362	369.772	291.901	376.384	311.77	417.8
Fbxl16	E13.5_SM	139.953	134.241	115.54	112.041	96.1215	109.737	63.1996	87.9391	186.43	76.3403	39.8864	60.0047	65.7956	87.0258	71.1433	41.3794	123.893	49.9132	30.2932	35.701	352.045	211.137	280.629	539.967	239.121
Prkar1b	E13.5_SM	159.218	207.29	156.373	250.354	186.626	338.275	321.864	503.78	297.556	325.052	577.514	393.186	394.96	536.644	585.714	91.2084	233.733	235.873	122.223	152.506	1751.2	1572.06	1854.38	2442.61	1164.78
Alkbh8	E13.5_SM	1042.71	1478.76	1254.16	1568.73	1712.19	1036.52	1475.6	1235.84	1183.95	1396.92	1471	1366.8	1038.24	1192.63	1292.82	1288.06	1824.39	1127.14	1137.38	1250.65	3156.69	2547.04	2726.38	3355.06	3299.28
Rdh10	E13.5_SM	724.176	1000.3	855.512	871.683	776.094	1537.93	1516.88	1494.95	1458.21	1510.88	726.616	924.601	861.217	722.743	783.678	547.67	564.202	386.111	512.352	414.678	4708.37	4240.62	4709.68	4343.3	4475.32
Eya1	E13.5_SM	68.403	77.4196	94.2314	72.0167	86.4785	76.7783	61.6621	150.618	53.5574	80.7157	36.7581	43.7353	98.9163	47.6863	20.0383	155.086	146.908	56.5267	103.955	44.8358	502.269	336.136	492.621	507.402	487.587
Klf7	E13.5_SM	775.301	689.257	678.462	993.225	676.214	1024.85	1337.13	1001.09	894.301	749.326	1285.67	1062.53	986.557	1060.33	1329.64	1234.3	1387.92	1229.35	949.904	1187.3	2802.83	2499.2	3242.86	3440.12	3172.71
Adam23	E13.5_SM	420.855	322.701	430.36	461.598	423.505	772.259	552.234	641.286	548.011	565.029	950.366	964.395	795.978	1004.06	863.385	1526.98	1674.46	1823.78	1521.91	1267.43	6395.1	5577.98	7062.53	7948.61	6936.67
Nrp2	E13.5_SM	3687.66	3235.59	3470.79	3288	2813.39	3962.62	4046.38	3992.56	3216.41	3311.7	4114.65	3992.15	4389.49	3804.55	3874.6	3185.02	4031.87	4563.27	3833.51	5587.48	20126.5	19444.8	22563.3	25027.6	21548.6
Ptp4a1	E13.5_SM	535.748	702.988	524.734	577.167	681.267	672.892	941.369	535.984	857.578	440.49	484.716	422.177	438.252	452.492	430.218	359.367	279.403	226.735	226.912	201.027	1943.05	2190.89	1427.34	923.908	952.587
Serpine2	E13.5_SM	1358.56	1615.82	830.423	1141.5	857.934	999.988	1036.62	1429.53	1230.8	1177.03	1618.72	1394.91	927.868	973.332	1412.8	1928.59	2179.43	1620.58	1762.04	1490.41	5261.24	5419.87	5175.25	6358.29	5554.29
Nr5a2	E13.5_SM	340.748	340.753	321.729	358.385	299.933	256.437	237.67	289.667	240.794	259.376	379.973	620.101	390.932	327.578	426.867	259.004	281.029	361.087	375.283	639.518	8269.08	6329.55	7772.17	8690.23	6850.96
Nfasc	E13.5_SM	265.731	607.148	250.865	287.995	202.577	47.6453	61.418	74.2561	103.981	119.836	119.898	21.7288	23.8115	39.9235	30.5865	17.0887	39.1083	29.3333	15.5178	31.4655	574.061	273.97	1603.89	524.512	2751.02
Xpr1	E13.5_SM	850.952	1020.33	825.811	905.405	822.29	819.706	744.432	850.815	749.926	794.168	1308.48	966.666	982.978	1054.2	1010.8	1110.48	1266.73	1126.42	1118.16	1306.52	2684.21	2404.48	2895.44	2994.56	3025.56
Fam129a	E13.5_SM	608.205	531.091	629.155	614.211	624.772	1205.85	967.027	1008.56	1220.46	901.722	2214.41	2913.16	2613.67	2539.22	2799.69	3514.61	3643.65	2959.27	3265.6	3336.1	9406.54	10971.9	9374.45	9928.09	8865.41
Vangl2	E13.5_SM	534.105	607.124	542.167	811.821	431.767	714.513	408.117	715.081	638.323	571.345	538.93	581.062	424.131	380.198	788.021	163.976	400.903	299.993	231.848	299.485	1230.84	1044.46	1112.82	1652.66	1241.46
Prrx1	E13.5_SM	8039.35	6953.16	7571.6	9358.66	7324.77	5554.13	6081.4	6818.2	5863.07	5913.19	5408.12	5476.51	5347.15	4675.44	5717.59	4500.16	6066.22	4959.41	4309.74	5683.46	18747.7	15891.6	17879.1	19929.4	19886
Astn1	E13.5_SM	352.055	194.653	234.265	374.352	334.698	109.565	142.592	350.186	150.321	262.964	89.9363	114.939	91.9902	89.8272	178.808	49.1065	138.937	98.0599	48.8934	114.825	925.709	331.883	688.424	701.084	765.467
Pacc1	E13.5_SM	218.345	239.062	205.506	228.698	237.277	168.507	210.743	261.009	235.417	242.075	195.791	222.322	235.021	214.768	166.513	227.188	254.776	259.718	236.985	256.024	586.509	524.585	581.244	572.262	493.142
Frmd4a	E13.5_SM	3016.17	2480.88	2325.99	2950.31	2049.27	3356.68	1479.26	2011.25	2447.09	1732.25	1570.32	1439.46	1697.65	1581.13	1164.47	1505.7	2277.66	1483.28	1428.06	1524.28	5770.11	4508.49	5102.96	5311.37	6139.7
Kif5c	E13.5_SM	225.714	105.985	132.873	215.687	103.972	129.077	163.96	398.849	132.368	142.81	85.5117	62.3349	178.631	161.581	50.6754	134.111	46.4983	113.107	193.668	168.977	1859.91	1496.45	1735.94	2859.31	1945.69
Lrsam1	E13.5_SM	413.274	387.286	484.252	331.871	348.583	398.464	551.734	367.844	266.152	385.285	251.232	283.791	321.011	158.615	432.271	239.567	300.907	307.417	380.287	327.953	654.415	788.846	786.183	1160.24	915.988
Inpp5e	E13.5_SM	672.81	627.576	807.101	737.906	562.838	614.019	770.469	691.028	603.926	664.858	660.613	644.756	760.743	754.362	431.057	468.164	550.824	386.538	596.999	400.772	1289.83	1448.37	1345.92	1533.81	1284.78
Mapk8ip1	E13.5_SM	426.036	465.47	414.178	330.88	342.963	418.924	464.475	544.709	437.961	423.321	391.994	435.984	380.758	420.378	440.735	548.736	720.996	496.692	528.165	416.691	1327.29	1395.31	1355.95	1561.02	1324.71
Napb	E13.5_SM	177.206	197.893	176.92	213.209	211.047	200.255	173.773	239.506	171.256	209.871	207.803	131.935	201.076	188.18	182.257	185.486	201.651	220.836	196.381	173.989	544.469	399.257	576.749	512.845	536.222
Stmn2	E13.5_SM	13.0945	8.09914	17.1344	18.9366	2.53668	187.367	122.478	326.629	239.717	373.516	79.7099	70.3959	129.199	90.2828	115.568	94.5944	65.8049	89.9874	113.051	74.5271	1472.23	1961.24	1237.16	1435.5	2206.24
Zbtb46	E13.5_SM	163.598	152.79	132.53	149.524	174.7	119.344	202.516	167.746	126.692	160.129	343.516	292.153	292.645	277.022	253.433	615.427	669.161	543.874	553.005	473.138	1807.04	1912.64	2325.84	2698.42	2170.96
Tnik	E13.5_SM	1025.14	1073.06	1236.21	959.363	1268.1	763.101	1035.48	1138.87	891.738	991.049	779.842	596.233	514.242	630.019	477.249	813.189	1034.17	967.846	695.09	672.142	5267.35	5088.78	5607.12	5901.16	5686.94
Serpini1	E13.5_SM	90.2765	146.99	170.303	153.607	182.983	401.275	347.525	270.5	286.619	261.41	142.043	152.183	227.845	152.058	171.911	101.01	107.645	158.774	121.235	200.064	898.161	1484.02	942.096	743.633	1169.83
Syt6	E13.5_SM	4.54662	1.58043	4.19884	14.5459	3.62707	33.2236	33.6597	39.4222	25.4778	14.2985	55.0603	93.8823	53.7228	95.6461	113.371	8.7432	12.2966	7.63039	12.3843	16.1462	775.282	464.344	735.1	633.57	793.177
Slc16a4	E13.5_SM	90.6253	172.698	72.3467	96.0219	74.555	117.942	101.932	117.73	104.892	102.813	64.8678	47.3001	72.5607	51.312	57.8619	49.6113	28.744	23.6441	26.0418	27.8262	300.267	328.265	224.476	235.369	305.433
Olfm3	E13.5_SM	7.79252	1.661	7.56495	3.44282	26.5592	54.7557	8.21617	3.90089	8.84237	17.4828	8.32823	6.53764	1.96961	13.4204	3.28148	2.74285	20.1327	9.69472	11.2034	11.6722	512.673	548.683	583.896	742.227	796.114
Sfrp2	E13.5_SM	2396.83	5366.5	1934.5	2253.09	1618.96	1375.49	1302.7	1790.86	1415.27	1405.81	1125.27	1072.26	1342.78	1437.94	1209.15	799.144	1211.04	631.872	725.397	934.199	6569.16	5937.58	6321.5	7302.01	7592
Ntrk1	E13.5_SM	18.1067	15.3245	43.4277	15.2465	27.1977	18.8461	32.276	64.057	47.3941	42.2532	2.27664	1.20174	9.69158	11.6091	8.07334	5.62347	1.98269	7.95056	8.13683	6.26998	488.167	473.545	495.88	495.842	389.532
Fbxw7	E13.5_SM	1029.64	1180.39	950.59	946.553	1078.6	860.402	917.119	897.285	788.493	858.24	860.667	905.802	898.357	684.329	837.798	820.974	981.014	889.834	843.25	770.969	3032.67	3667.31	3052.62	2866.49	2916.22
Celf3	E13.5_SM	0.657919	0	4.1119	0	0	2.65558	1.6876	14.9831	0.450646	9.51026	7.33257	2.09109	8.6066	8.81039	14.042	64.8718	0.574999	6.97706	19.8877	6.30494	949.833	501.678	708.464	342.764	528.281
Spata1	E13.5_SM	125.325	111.62	130.94	130.948	128.637	151.367	124.582	176.671	138.541	159.253	155.449	134.627	129.031	139.804	130.496	119.916	118.451	116.892	86.6116	89.6536	402.138	215.922	301.925	259.614	361.732
Trp53inp1	E13.5_SM	841.474	1717.07	1104.72	1214.81	1226.9	1215.54	1046.33	1043.83	1020.28	1205.14	1171.42	1291.99	1060.68	1128.36	1050.84	1107.21	1054.89	1053.82	1103.83	1193.14	2642.17	2344.97	2528.75	2054.55	2831.33
Ubxn2b	E13.5_SM	321.659	414.782	400.155	391.328	407.966	468.936	470.849	469.433	378.376	428.694	639.736	665.764	551.208	501.512	503.575	587.09	552.18	573.765	565.51	636.403	1689.53	1699.47	1985.44	1693.68	1751.4
Brinp1	E13.5_SM	580.313	601.434	562.255	504.885	530.644	193.435	206.059	194.366	242.079	275.542	73.8291	90.6076	90.847	97.1878	97.3486	146.163	69.1279	43.3842	73.8891	54.6618	1175.4	1872.78	1861.75	1493.62	1683.1
Pappa	E13.5_SM	308.878	317.727	291.586	280.367	218.519	518.823	575.272	638.658	468.502	363.553	1173.61	1192.13	1106.05	787.095	1412.83	204.694	210.165	86.1311	225.797	146.299	5671.06	6354.57	6668.01	7363.87	6860.15
Elavl4	E13.5_SM	249.885	154.224	150.613	162.418	88.7689	47.0595	68.7465	84.5819	58.3651	64.5055	100.982	28.6048	37.7011	29.5261	25.6023	41.7674	18.7089	37.3924	18.9883	26.2743	1666.34	1304.84	1467.14	1242.16	1653.33
Dock7	E13.5_SM	4125.78	4276.72	3904.42	6536.65	4389.47	3934	5249.72	3951.2	3749.52	4664.68	4857.6	5463.71	4226.66	4012.34	5066.9	4490.94	6330.09	4315.5	3719.71	4410.36	9477.17	7059.31	10891.8	11132.7	10945.3
Hook1	E13.5_SM	336.998	412.365	118.862	230.993	161.31	109.583	102.393	217.217	166.373	90.9855	204.264	67.4314	74.5814	132.812	178.677	194.231	195.969	229.215	58.5884	40.4298	613.232	426.911	886.043	516.981	795.365
Lrrc42	E13.5_SM	342.805	392.005	305.601	371.505	252.544	295.676	309.676	306.537	342.626	297.481	141.669	153.695	214.459	185.706	316.031	288.517	394.726	164.102	178.307	184.11	820.531	625.77	635.762	1142.91	830.739
Ccdc30	E13.5_SM	167.848	118.138	153.813	102.677	143.314	100.06	126.638	175.702	107.564	109.322	163.954	182.219	109.221	210.348	129.729	104.004	114.727	140.87	145.733	131.798	299.188	365.35	338.012	324.074	361.875
Azin2	E13.5_SM	179.016	166.89	199.13	155.404	154.715	214.712	221.959	292.474	237.83	209.749	293.349	205.776	231.402	252.086	314.864	154.022	203.752	152.837	145.023	177.413	696.31	557.078	585.742	662.62	542.579
Crmp1	E13.5_SM	266.198	230.757	397.877	411.663	439.205	464.235	353.732	275.986	339.553	291.889	199.932	181.144	164.276	130.346	204.69	108.438	121.945	183.467	135.254	267.109	1783.42	1019.83	1527.11	1812.56	1621.06
Mapre3	E13.5_SM	69.7701	110.491	77.2258	131.336	149.174	107.135	110.345	111.47	32.6561	86.0257	216.209	199.018	162.969	183.928	132.508	171.73	299.081	108.85	115.03	166.241	512.136	374.475	553.03	788.929	598.297
Dpysl5	E13.5_SM	122.583	62.7325	120.19	46.8603	69.9246	50.5233	34.7735	121.313	60.3283	81.5657	176.513	41.5752	55.4822	158.959	48.7947	112.296	270.288	89.3122	115.627	29.5048	289.232	435.847	485.027	418.332	482.223
Nsun7	E13.5_SM	33.7189	15.8389	22.9854	21.209	25.0171	46.4188	26.2989	47.7736	47.4664	29.733	56.3935	47.4516	50.9061	59.7716	53.4458	95.5435	126.124	77.6707	96.8425	139.573	292.78	283.146	357.23	373.296	250.473
Uchl1	E13.5_SM	311.64	518.117	255.396	402.559	348.892	497.015	592.664	336.622	427.627	469.414	143.891	138.239	433.983	119.497	106.233	304.519	346.673	175.499	244.151	179.839	1902.16	1742.6	1361.36	1161.29	1569.92
Rufy3	E13.5_SM	513.893	633.743	670.357	583.21	777.407	620.996	676.516	658.333	573.181	705.622	775.802	725.908	726.478	676.453	670.442	751.086	859.093	826.189	759.466	871.068	1805.88	1802.93	2065.53	1810.09	2223.11
Gpc2	E13.5_SM	676.076	705.935	566.255	747.999	620.406	684.87	551.813	678.984	543.743	581.15	341.383	382.867	398.895	290.1	421.948	183.418	184.093	165.898	280.84	194.736	1219.13	1614.3	1580.99	1320.42	1297.87
Dtx1	E13.5_SM	61.2477	50.9329	89.5691	80.0957	58.0434	161.233	197.787	243.403	113.609	144.947	140.878	40.8092	108.839	170.227	62.4807	68.6761	126.938	140.302	79.1395	87.9516	377.457	356.462	683.051	600.871	446.704
Ccdc136	E13.5_SM	228.058	344.523	124.819	218.589	205.327	215.469	309.894	304.807	239.081	382.121	194.432	348.149	225.103	140.64	409.907	75.4907	140.214	50.1751	134.331	163.66	662.629	760.51	950.596	789.967	769.69
Adcyap1r1	E13.5_SM	91.2077	30.6058	57.1058	50.726	90.0478	71.2818	71.7391	137.71	88.1407	50.9056	158.376	156.25	120.307	146.233	61.3477	478.325	644.625	518.267	497.57	326.068	1722.95	1556.22	2018.44	1871.31	1966.49
Avl9	E13.5_SM	978.359	1521.4	1040.6	1231.02	1360.77	1497.91	1385.21	1280.33	1477.72	1474.43	1322.78	1409.59	1171.43	1161.35	1375.65	1309.9	1234.95	1077.63	1169.83	1415.61	3758.25	3507.93	3971.64	3393.6	3990.04
Add2	E13.5_SM	191.323	131.554	187.233	154.122	130.973	276.619	176.879	225.601	278.876	146.854	93.9836	91.7863	100.414	93.2709	81.7403	80.0078	183.013	100.047	153.347	121.024	631.002	557.25	639.535	692.691	629.473
Ret	E13.5_SM	52.5355	38.9826	18.7955	21.25	17.57	155.137	125.379	173.183	161.313	172.598	213.96	179.164	125.778	253.395	168.505	137.041	170.428	186.637	144.081	192.636	457.014	361.475	432.409	505.68	443.084
Ldhb	E13.5_SM	363.55	578.562	438.115	386.511	487.923	298.87	520.636	476.644	506.649	420.532	388.388	560.946	443.466	400.105	514.832	1223.54	1099.39	967.321	1085.45	826.999	4635.89	5218.72	5497.64	6161.8	5102.94
Srgap3	E13.5_SM	370.41	274.603	299.684	351.435	371.342	707.496	803.847	753.794	635.374	535.024	887.552	500.575	759.04	983.401	742.004	448.033	661.812	401.069	409.781	441.942	2008.94	1630.72	2445.46	3002.45	2369.9
Ttll3	E13.5_SM	82.0188	43.4648	69.5527	81.3755	59.7905	75.5021	73.1089	91.6895	64.6557	83.668	105.71	88.4677	120.144	68.6274	123.748	114.698	59.5017	96.6876	82.9987	129.724	177.42	192.614	218.753	251.707	243.289
St8sia1	E13.5_SM	300.866	304.995	157.518	220.061	143.864	224.13	193.668	153.551	236.354	171.316	170.991	138.51	88.1267	201.803	70.5517	42.5017	73.9886	170.254	174.884	179.679	568.32	494.704	457.564	721.131	812.805
Tmtc1	E13.5_SM	132.879	99.0389	89.7757	107.623	127.117	442.247	397.59	522.476	377.57	402.949	454.556	389.095	376.264	406.952	882.93	189.479	246.225	150.521	180.175	235.506	1279.22	967.891	1442.82	1328.37	1658.18
Slc8a2	E13.5_SM	184.312	230.336	221.512	161.723	164.797	218.773	259.184	274.961	247.154	232.751	101.191	79.3262	103.023	93.563	99.3105	42.3789	29.127	26.2461	43.6039	22.4981	467.922	526.216	605.053	591.01	513.825
Nr2f2	E13.5_SM	375.219	479.153	354.672	520.853	398.436	733.084	662.428	735.397	586.997	532.834	1149.02	1323.55	1140.14	886.67	1604.69	1190.14	1453.17	988.769	871.093	1089.02	8106.15	7391.25	9134.16	9496.97	8981.52
Synm	E13.5_SM	61.9829	65.2077	81.068	42.0471	62.1581	61.3858	87.6906	95.6443	84.2105	104.289	46.8034	89.4196	107.755	147.388	34.9946	185.008	129.74	123.024	195.445	102.684	293.808	356.567	351.775	366.296	356.064
Acan	E13.5_SM	12.3815	1.6966	7.08315	17.0328	4.6724	2.76153	6.77357	10.3202	9.03186	3.65462	110.369	91.6803	103.491	95.2488	57.8185	102.862	63.0324	56.0067	39.6933	50.6525	680.168	315.708	583.329	829.927	419.655
Stard10	E13.5_SM	105.18	56.5066	65.8601	67.9947	54.9591	72.8949	63.6965	122.921	90.0383	110.8	120.055	72.1447	58.5546	46.8068	126.415	56.8556	34.2942	47.0663	41.9973	56.8168	327.128	396.363	330.29	310.695	291.866
Crym	E13.5_SM	5.54259	22.4898	8.41163	5.76893	36.6923	11.31	12.277	11.1293	19.0632	9.86169	28.5569	25.9031	13.5989	11.0072	22.6935	144.94	205.884	98.0054	106.485	32.4011	521.869	565.034	473.557	411.432	516.797
Syp	E13.5_SM	29.489	70.1741	20.5974	26.468	38.3464	100.003	33.1294	34.3935	31.7007	32.0682	45.8356	50.1398	155.206	93.9692	69.9813	85.4221	55.8883	92.5804	42.552	57.6349	392.318	601.189	423.421	340.415	455.644
Aff2	E13.5_SM	324.602	333.915	135.561	243.948	115.318	109.443	121.033	102.724	93.6179	134.407	155.917	192.323	141.153	130.626	159.444	73.2841	179.859	150.5	92.2779	130.605	2563.87	2037.22	2620.7	3224.4	2683.12
Tbx22	E13.5_SM	74.8502	22.3793	67.967	41.4074	11.4799	50.8488	105.768	88.0098	49.8615	84.5024	22.0238	68.3963	92.0806	86.8445	36.1259	10.3933	16.6406	28.9939	6.61217	18.208	1498.4	1445.15	1014.78	699.258	1086.25
Dcx	E13.5_SM	115.979	81.5555	81.498	33.7767	254.885	96.4872	77.4947	339.51	222.996	132.907	173.531	94.0295	113.942	90.9343	75.7042	778.711	1097.45	493.096	562.253	123.567	5555.87	3897.77	5616.18	4931.36	5481.41
Gpm6b	E13.5_SM	508.379	675.097	571.143	617.292	603.247	1098.34	1049.32	862.26	921.424	1026.29	1366.77	1744.98	1121.67	1192.92	2051.86	1222.88	1161.64	1041.77	1122.37	1144.36	6117.8	7464.51	7165.49	5992.27	7520.49
L1cam	E13.5_SM	227.656	55.5913	171.678	122.283	134.601	194.007	168.366	137.314	230.209	250.572	264.129	137.405	163.153	108.383	165.419	103.039	174.823	186.169	97.6426	89.31	555.969	618.255	800.979	613.84	760.127
Zcchc18	E13.5_SM	80.5068	102.851	91.5705	87.5576	91.2702	98.8925	122.507	103.042	126.115	125.048	27.7241	48.0705	38.696	30.3114	53.1453	16.9526	10.6428	7.02708	6.47254	8.97574	298.868	218.46	232.175	259.617	282.664
Tbc1d9	E13.5_SM	420.078	402.167	370.629	330.504	340.298	371.773	420.276	352.323	372.875	376.487	405.225	372.317	307.915	347.177	559.731	215.575	380.371	237.786	228.937	246.251	1271.76	1108.4	1222.27	2175.82	1226.93
Gnao1	E13.5_SM	299.196	182.263	185.736	165.485	176.429	243.178	166.238	331.605	187.276	163.563	181.88	226.251	261.383	256.283	388.494	94.932	435.798	136.322	142.434	142.053	568.888	538.318	595.047	988.217	1085.22
Bbs2	E13.5_SM	278.796	465.199	396.78	428.165	272.29	343.985	295.18	296.387	426.438	477.728	393.307	307.696	363.706	360.964	279.825	384.337	205.265	182.514	360.528	360.933	826.106	855.315	630.627	764.326	896.117
Lpar2	E13.5_SM	121.225	100.73	69.5583	96.2882	65.9744	86.0003	125.241	107.046	85.8528	112.492	90.5481	71.7588	44.4365	96.0981	75.9482	33.5791	48.0564	27.1284	50.8805	71.5381	329.523	296.469	362.688	376.118	344.513
Smpd3	E13.5_SM	25.508	46.8951	24.7631	31.2734	26.204	35.3996	22.7346	22.897	28.6861	23.7169	37.4846	22.7845	25.3863	56.7634	38.2348	48.259	33.6341	22.4787	39.5827	46.9248	443.808	389.537	439.313	477.939	537.823
Tmem231	E13.5_SM	326.656	353.504	298.495	310.682	307.772	200.225	250.493	279.645	283.79	285.375	256.444	253.724	249.54	324.502	291.346	135.033	220.828	254.798	204.122	273.034	744.629	849.982	796.298	854.652	650.522
Pdgfd	E13.5_SM	154.426	149.123	137.88	112.698	116.273	489.208	352.849	459.784	332.059	337.1	599.936	695.807	626.814	743.511	574.851	441.152	496.817	473.797	528.312	622.655	1266.43	1676.14	1350.38	1247.75	1517.77
Grik4	E13.5_SM	83.5678	94.5857	89.1619	88.9073	83.4974	35.4792	62.5162	74.5929	48.3995	43.9269	24.0502	2.91903	7.43115	22.9459	25.9534	16.6985	34.9157	19.5697	34.1523	14.2447	797.971	867.154	1011.57	1150.33	881.56
Mpzl2	E13.5_SM	32.1877	24.0076	51.0322	35.9959	45.8359	37.8398	46.2455	74.3082	44.1465	36.568	88.718	45.1007	34.7768	129.591	74.4209	110.721	54.8961	42.0711	76.5589	77.0786	494.457	311.143	449.74	406.298	520.692
Rora	E13.5_SM	169.925	236.585	229.035	277.889	333.527	218.06	243.429	201.204	174.181	228.352	583.92	458.877	486.921	411.985	347.341	365.36	521.113	324.529	458.195	305.317	937.908	880.389	1261.81	1338.63	1288.89
Gsta4	E13.5_SM	152.122	285.749	127.682	160.462	183.118	301.594	307.885	346.119	325.898	284.627	144.516	127.537	71.7469	82.6844	168.678	85.8946	76.4573	59.1425	72.6338	69.4433	1332.16	2273.4	1535.43	1240.94	1441.66
Plod2	E13.5_SM	1777.69	2302.9	1575.89	1862.33	1746.07	1631.26	1908.18	1807.79	1780.2	1806.44	2195.63	2155.69	2161.14	1793.28	1766.17	2974.48	3013	2719.65	2927.68	2440.97	6025.16	6896.24	7012.32	5884.42	7122.68
Rbpms2	E13.5_SM	231.477	240.693	165.244	244.725	167.267	153.28	204.734	209.854	232.513	183.099	141.384	203.942	135.659	102.888	115.158	235.305	207.595	188.988	242.728	195.896	387.123	496.408	443.13	497.391	397.933
Trib1	E13.5_SM	256.926	276.584	301.621	273.335	284.059	231.99	270.115	204.196	237.699	235.142	357.836	252.871	312.018	250.849	273.616	397.242	365.944	293.527	298.662	322.962	815.292	707.287	584.797	835.047	713.48
Cish	E13.5_SM	80.2373	59.821	57.8655	168.298	61.5776	38.6218	102.589	56.0396	53.902	136.877	166.209	68.1568	56.4972	64.4044	112.287	245.211	122.798	46.541	59.7909	71.0674	324.937	305.207	484.904	559.82	191.15
Cdhr4	E13.5_SM	125.673	129.327	98.973	105.083	116.3	230.312	138.118	139.983	93.7143	88.6247	119.585	132.195	156.836	93.7394	110.343	33.9326	68.9266	112.758	19.6364	42.3964	391.423	484.942	622.129	661.243	479.107
Amt	E13.5_SM	154.334	154.733	172.513	163.834	163.259	130.816	268.288	163.325	168.396	198.004	139.417	192.452	138.697	188.368	93.0742	116.124	130.123	78.6081	120.637	146.403	363.667	333.459	395.301	491.208	349.355
March3	E13.5_SM	49.9078	44.154	45.0612	43.6169	33.4255	79.403	60.8203	75.8381	69.7873	55.1663	125.586	133.545	159.398	121.07	157.567	148.028	134.044	168.751	134.939	171.653	289.861	338.331	339.77	357.808	295.631
Lama1	E13.5_SM	392.876	337.346	300.735	391.894	355.594	592.723	698.906	380.858	557.852	610.512	209.792	72.6732	55.8173	120.349	44.5599	51.8202	75.1754	85.2206	66.3892	106.676	2502.48	1529.69	1737.33	2181.37	1581.92
Ccdc85a	E13.5_SM	69.3474	84.4861	58.5994	53.0041	52.2525	56.8189	55.8175	57.4683	47.5709	102.726	192.851	124.913	119.721	127.303	149.047	160.964	240.51	180.409	132.828	149.287	1238.36	1482.78	1716.03	1457.48	1939.35
Sgpp2	E13.5_SM	20.2369	8.17305	32.5708	22.0228	13.1299	8.86877	20.8844	43.9795	17.093	17.6055	34.1496	26.4383	37.5549	37.149	14.1283	28.1173	20.8183	35.7775	25.4276	58.5198	486.395	481.106	413.393	421.199	489.157
Stk36	E13.5_SM	121.146	148.189	123.631	114.027	103.654	60.3771	118.581	131.993	95.2317	130.759	120.521	153.137	29.959	120.614	192.465	105.909	58.4533	125.01	116.549	137.424	321.813	221.526	364.625	384.581	300.482
Ptprf	E13.5_SM	2196.5	2506	2271.59	2439.15	1956.69	2264.88	1915.39	1982.24	2290.61	1635.02	2349.14	2287.23	1501.29	1566.72	2134.24	1211.25	1312.87	853.596	1075.54	1141.8	4806.15	5391.41	6028.51	7206.08	6995.28
Dpyd	E13.5_SM	85.3056	99.8134	77.5309	119.51	123.8	110.66	137.976	85.0408	67.2317	63.2811	339.598	274.962	192.899	245.535	246.744	268.114	341.951	280.944	189.421	247.308	616.204	611.823	712.672	588.446	621.338
Snap91	E13.5_SM	168.092	101.229	66.2453	113.003	112.726	57.4501	92.079	114.517	95.9167	76.8335	94.2457	230.809	150.176	148.937	107.413	89.3323	147.881	249.503	83.6828	39.8222	316.909	185.075	336.036	395.197	492.367
Adamts15	E13.5_SM	1348.66	2308.33	1287.73	1631.93	1252.13	1236.47	1558.31	1320.29	1252.16	1102.48	884.733	490.879	606.362	754.976	464.48	1997.98	1627.19	1130.06	1655.39	983.181	8612.52	8440.51	9690.18	10455.1	8610.07
Tmem35a	E13.5_SM	253.493	364.722	299.341	300.696	315.118	223.936	249.664	251.448	226.093	230.632	161.641	158.63	192.62	110.286	210.916	131.589	90.2125	80.8307	128.155	98.2296	1098.6	1328.95	1300.61	1212.95	1274.2
Fndc3c1	E13.5_SM	828.49	1163.43	983.46	683.205	1048.2	567.708	464.895	952.306	546.177	629.209	142.843	193.219	180.19	280.213	140.405	1377.96	1661.79	915.904	973.886	594.417	4342.85	3324.4	3308.41	2576.15	3161.14
Rbm46	E13.5_SM	84.5312	82.0822	58.3554	72.9159	94.7465	100.154	95.9735	140.082	103.964	101.229	51.5398	69.3166	45.9045	69.8524	74.0916	107.521	165.088	147.26	161.469	164.924	428.122	492.403	500.309	354.327	468.748
Fhod3	E13.5_SM	357.148	466.645	281.855	346.702	249.055	298.552	290.267	294.998	337.396	282.337	211.838	207.945	199.936	224.123	138.309	309.405	525.77	222.691	197.417	48.3317	1419.8	1492.36	1603.96	1696.81	1604.12
Eda2r	E13.5_SM	205.903	175.594	168.765	176.107	177.499	389.087	391.569	359.878	402.803	424.703	259.896	246.138	260.785	216.131	230.581	506.154	474.105	400.112	379.098	211.713	963.074	1311.29	1089.77	874.144	1082.83
Pcnx4	E13.5_SM	309.943	341.225	297.79	424.362	333.875	254.977	328.455	310.724	332.536	330.983	301.655	346.101	313.765	312.284	458.162	317.164	447.097	319.347	309.199	405.459	745.982	606.818	765.401	829.069	847.805
Exph5	E13.5_SM	157.851	48.888	78.1026	23.4218	67.2906	41.2495	73.4985	101.185	59.7424	63.0484	97.3693	148.192	89.3656	218.792	73.9764	74.7969	63.3066	130.168	177.932	163.676	489.337	396.903	470.202	524.197	406.566
Tut4	E13.5_SM	2750.1	4068.42	3254.87	6248.59	4117.88	4253.83	3669.76	3864.97	3128.82	3242.13	3987.91	3771.85	3555.08	2976.1	4850.85	3375.48	3741.38	2337.09	2149.73	3125.98	12380.7	7693.42	12529.5	11974.6	11599.9
Tle2	E13.5_SM	314.417	291.98	500.751	478.948	395.867	408.21	340.266	444.585	352.912	306.993	413.891	465.137	508.071	313.04	453.4	367.42	249.706	190.991	222.442	292.654	1848.64	3097.89	3707.12	3414.04	2751.3
B3galt1	E13.5_SM	103.879	99.108	45.5775	117.371	57.5018	54.3682	61.4531	29.2197	43.715	12.2253	80.1406	88.3675	78.8205	59.8865	107.277	104.936	210.278	97.9862	96.6758	141.301	476.93	291.063	341.703	594.875	443.847
Larp6	E13.5_SM	112.9	120.552	80.6515	94.8673	65.6496	135.249	128.155	108.037	121.982	129.4	179.855	189.875	167.18	167.171	202.843	56.2347	86.2471	68.9048	85.4367	91.9597	455.386	509.462	499.717	605.14	459.269
Shc4	E13.5_SM	106.857	38.8612	75.7654	83.2386	80.6748	126.396	93.7726	88.4901	100.023	85.114	91.9162	62.385	88.4111	68.8778	74.1898	36.0076	57.0156	86.17	39.2344	37.8896	181.83	216.661	229.141	272.641	223.061
Brinp3	E13.5_SM	16.478	27.1347	17.5444	5.96929	18.8866	52.0864	33.0201	47.0041	71.8764	30.785	139.092	178.866	112.856	60.4791	134.055	46.6793	45.629	11.7819	46.8291	56.0037	381.233	1063.21	698.454	546.527	601.503
Kctd1	E13.5_SM	341.73	261.852	346.654	264.863	245.579	156.218	175.984	296.534	231.145	177.525	253.64	276.621	169.477	175.75	374.165	71.9623	52.6176	50.9348	68.3511	73.396	840.638	708.405	889.254	782.126	636.92
Lrrn3	E13.5_SM	117.161	80.7088	107.794	59.2921	83.4688	123.054	110.118	166.357	113.435	149.647	127.492	155.024	138.105	163.688	121.1	77.6039	95.1692	133.834	102.727	118.085	1258.96	1031.21	1102.06	1072.55	1326
Csgalnact1	E13.5_SM	226.992	305.241	277.196	304.264	725.48	712.024	254.302	305.066	326.111	381.101	606.673	449.266	457.319	241.271	308.83	318.079	405.479	410.598	392.448	267.231	1179.93	1078.2	1563.76	952.714	1400.81
Bicral	E13.5_SM	465.768	432.689	380.716	398.704	339.756	287.11	500.327	412.631	299.775	234.129	546.514	445.452	657.341	343.139	527.677	344.476	435.467	700.485	448.421	402.865	1252.64	678.124	1273.78	1934.76	1074.81
Stag3	E13.5_SM	162.993	166.694	198.778	175.444	229.699	240.862	315.53	238.721	186.148	193.28	174.419	218.654	230.226	212.186	202.543	108.697	113.765	125.432	144.124	189.311	747.233	916.734	1165.06	747.519	684.039
Zmat4	E13.5_SM	44.9249	41.7175	73.8621	19.8111	37.2603	27.5979	29.8548	26.8206	57.167	27.0275	65.4334	26.8255	29.2082	82.4054	60.7674	23.5667	22.6812	33.7348	119.888	44.4686	540.967	291.361	546.412	514.667	495.233
Cdkn1c	E13.5_SM	21170.3	18264.1	15418.9	13585.4	14042.1	24579.3	20600.7	28762.1	20985	22062.2	26464.8	24803.2	26866.5	27093.9	22786	32412.9	36538.8	34453.9	33619.7	30055.7	75581.2	81051	64831.4	75238.2	71395.3
Kmt2c	E13.5_SM	3057.99	3459.4	3049.29	4515.91	3725.65	3943.28	3949.29	3100.01	3099.96	3339.11	5190.01	4589.41	4344.95	3731.4	4870.23	4598.48	5754.29	3944.23	3629.58	4181.88	10231.5	7904.56	11616.4	11693.1	11158.5
Bcl9	E13.5_SM	639.726	558.543	649.061	671.031	716.543	717.137	615.364	667.189	507.645	287.033	767.412	696.089	512.901	579.082	798.382	580.878	724.587	463.149	585.129	432.396	1997.59	1462.25	2010.23	2360.94	2023.74
Kcnh2	E13.5_SM	81.2454	43.1171	54.6598	66.625	85.7285	82.7799	102.714	182.131	93.8628	73.974	87.2634	68.2136	99.8348	160.613	74.3485	186.815	237.69	123.339	143.24	57.6501	375.877	377.065	489.602	516.749	388.982
Satb2	E13.5_SM	317.495	247.455	102.263	162.164	80.1444	278.53	109.535	197.423	231.525	226.319	260.221	364.733	311.807	465.753	461.791	73.2225	73.3591	203.112	210.952	332.319	2214.78	1395.05	1351.87	1982.95	1291.49
Sgsm2	E13.5_SM	255.461	198.532	243.696	290.788	281.187	125.297	180.944	178.109	187.872	141.489	233.075	168.592	178.734	177.452	328.057	263.405	290.16	172.954	348.378	242.222	660.755	505.198	813.632	922.326	705.776
Mpp6	E13.5_SM	2639.96	2437.02	1810.15	1809.8	1846.99	1701.59	1826.97	2287.8	1963.58	1885.41	1540.94	1637.63	1469.12	1569.03	1298.24	2054.47	2258.63	1865.45	2099.94	1903.45	6543.14	6819.87	7279.67	6973.94	6823.09
Rgs4	E13.5_SM	73.2226	156.774	70.8412	60.1705	53.0619	103.228	107.531	107.382	107.401	91.2704	74.3064	118.437	106.991	64.8619	122.204	107.65	87.552	76.3222	88.8504	93.5247	1018.89	1147.38	1053.33	889.705	1456.02
Tmc3	E13.5_SM	257.199	433.433	412.218	440.336	463.739	66.6027	108.726	151.98	148.82	108.719	34.1463	27.9317	57.4934	125.047	63.7583	26.1087	89.0194	41.9785	76.8666	47.7232	797.338	756.601	981.641	905.595	1102.8
Rad9b	E13.5_SM	279.973	319.951	285.089	322.66	382.207	293.83	310.233	359.172	329.207	307.829	259.44	190.397	306.712	201.127	215.138	170.868	212.415	209.99	187.596	203.949	693.167	863.039	957.762	844.456	874.974
Creb3l2	E13.5_SM	1449.23	1919.61	1476.2	2321.22	1713.89	1653.03	1486	1308.88	1333.18	1042.46	2195.05	1879.03	1985.55	1539.42	2534.59	1535.33	2701.71	1347.58	1692.89	1597.87	4794.77	3871.64	5157.15	6578.07	5624.65
Mindy1	E13.5_SM	639.19	432.586	527.761	600.908	479.058	481.797	483.324	518.007	436.382	467.564	468.472	675.823	696.443	583.794	742.193	574.954	677.627	719.693	507.738	705.795	1705.57	1292.28	1744.35	2107.8	1680.48
Soga3	E13.5_SM	38.5079	6.16122	29.2446	19.1038	28.6689	46.1879	27.1886	36.3088	12.495	34.2695	85.2467	35.9812	32.4729	50.7842	83.9001	5.08708	14.5837	26.3465	26.9563	5.25178	420.708	297.685	459.454	399.617	395.959
Whrn	E13.5_SM	100.113	87.6632	100.443	101.031	64.4984	97.6277	32.9477	80.5741	57.9029	75.6677	42.628	43.141	43.001	57.6623	76.1411	62.724	85.3297	69.1825	27.3194	55.4133	448.074	355.114	579.385	527.845	403.857
Cyp7b1	E13.5_SM	361.068	430.107	279.954	388.787	297.299	642.986	551.539	558.348	531.435	645.241	239.047	241.55	302.862	286.744	261.374	190.073	236.932	174.912	219.694	219.449	1309.46	1603.06	1395.56	1513.29	1518.28
Usp53	E13.5_SM	357.616	318.232	253.064	312.522	268.529	291.588	326.051	318.965	262.451	329.295	515.244	338.687	335.172	389.383	271.014	537.971	670.345	389.171	436.043	398.356	2193.29	2007.14	2675.62	2100.49	2131.74
Ldb2	E13.5_SM	623.026	538.018	657.817	688.908	525.009	740.583	378.986	817.575	614.414	480.945	837.013	711.11	836.362	853.502	1104.57	955.335	1241.04	1031.77	860.972	1363.26	4353.35	4312.69	4593.93	5337.17	4603.05
Alg2	E13.5_SM	1044.36	1207.79	1033.28	1571.61	1036.81	1146.94	1280.47	1078.74	1179.48	1163.88	919.7	1004.51	951.998	905.865	1178.21	1023.61	1164.29	767.856	826.716	794.773	3828.13	2174.43	2700	3703.81	3086.19
Bahcc1	E13.5_SM	514.276	417.018	592.357	830.452	522.615	339.12	520.777	594.585	430.972	386.484	578.223	674.784	414.207	491.333	623.553	682.023	907.575	503.449	378.897	450.315	1543.3	909.155	1634.83	2114.24	1406.18
Galnt12	E13.5_SM	71.0818	48.7731	47.6003	57.3359	59.1713	90.7283	51.7939	75.4514	61.3154	56.6046	79.5362	105.561	84.982	93.8623	76.7088	147.931	188.85	142.013	160.611	161.448	278.81	405.197	331.745	357.231	359.135
Plcb4	E13.5_SM	502.733	453.9	463.307	401.666	336.279	412.994	501.399	385.079	465.11	428.953	978.175	945.293	715.555	444.497	731.62	1041.67	1432.19	1050.79	1179.42	1139.14	2398.35	3487.99	3399.66	3035.78	3492.33
Negr1	E13.5_SM	456.776	332.639	243.189	111.707	177.201	562.74	329.889	480.611	216.662	461.925	709.419	932.206	716.148	467.521	802.676	183.489	214.355	246.623	312.635	367.873	2231.77	1601.04	2216.85	2104.48	2054.49
Bmf	E13.5_SM	1323.98	1084.69	1080.36	1249.28	1007.15	1613.98	1249.82	1605.18	1319.05	1158.68	1313.08	1290	1188.29	1242.85	1286.03	730.217	1033.03	903.753	1037.84	1140.74	3106.21	2961.06	3453.66	3653.82	3280.88
Alx4	E13.5_SM	1069.88	1312.07	987.672	952.839	1045.67	424.068	595.547	422.793	561.744	631.711	42.071	100.605	85.5278	89.6429	61.7124	21.8643	20.3488	23.966	22.0895	29.9296	4381.17	5417.35	4864.29	5775.36	4767.26
Plppr2	E13.5_SM	171.674	131.846	177.413	159.765	119.284	148.207	131.617	161.257	167.125	140.169	113.143	131.469	173.494	121.83	155.355	126.654	124.114	106.552	97.2602	96.8166	313.988	363.097	353.808	405.338	359.377
Rundc3b	E13.5_SM	180.336	213.746	150.48	161.721	183.152	187.947	175.748	140.826	145.666	217.715	112.422	95.9946	90.6789	92.3431	83.0336	139.895	70.579	109.234	106.394	129.97	566.405	717.53	630.972	564.865	755.851
Kazn	E13.5_SM	1082.59	858.294	1002.14	961.396	724.829	864.849	1085.28	1090.38	1015.35	1089.82	453.235	471.24	406.084	386.741	475.98	342.498	417.596	267.172	380.802	473.567	4120.44	4594.22	4477.95	5614.74	3914.71
Clcf1	E13.5_SM	119.744	112.987	146.038	126.481	102.884	197.128	195.762	218.557	166.075	197.928	132.823	182.211	185.869	192.614	164.805	58.9585	62.3954	93.4458	62.3156	89.8513	397.687	539.769	413.596	373.643	368.887
Cyp2s1	E13.5_SM	56.5058	57.2852	43.4718	59.3583	70.412	23.3011	35.1581	47.867	35.0006	37.0063	15.9492	9.62162	25.4758	20.4471	25.2567	5.63249	16.8746	15.924	9.16862	11.4931	708.095	546.335	646.012	720.272	498.764
Zfhx2	E13.5_SM	197.558	102.445	148.047	129.79	106.696	56.0434	78.0586	107.106	63.251	51.9916	101.263	115.762	79.4257	220.698	108.799	62.8243	117.328	111.515	198.839	103.427	336.843	141.338	284.779	482.386	286.908
Reps2	E13.5_SM	452.134	620.276	476.524	685.96	522.214	436.907	477.561	482.673	425.764	422.239	842.345	765.157	585.069	670.863	650.002	1205.53	1351.71	905.485	928.674	1054.2	2169.79	2285.98	2461.69	2271.49	2766.97
Trim62	E13.5_SM	85.1158	55.6684	59.7434	76.9466	72.4717	60.7702	62.2299	80.9744	71.8453	39.2006	94.364	97.2542	75.0802	109.798	141.96	62.3308	58.9491	44.9425	39.0814	33.1478	273.408	196.997	310.647	380.623	280.187
Nacad	E13.5_SM	15.7395	28.9865	16.0438	15.0204	36.074	49.5589	62.9302	33.4794	18.3702	22.3742	46.1586	144.745	67.1749	38.4278	141.864	24.5978	40.458	12.5322	48.4186	125.285	194.913	488.925	276.544	209.801	356.577
Fzd7	E13.5_SM	2279.31	4209.12	2087.63	2740.99	2292.11	1466.67	1551.14	1365.28	1528.27	1488.54	1350.05	1247.41	1123.01	1186.45	1487.51	1115.7	1364.09	1337.02	1016.09	1270.72	6384.26	6394.27	6316.96	7433.18	6529.4
Grid1	E13.5_SM	113.407	86.0345	100.82	91.8282	151.917	103.016	122.211	87.9175	101.528	107.361	44.0741	48.8561	49.2508	53.9384	41.0272	40.2806	47.0198	21.8049	21.6595	17.1958	266.7	213.363	259.958	240.839	242.349
Ccdc8	E13.5_SM	1417.64	1783.77	1620.78	2091.32	1332.69	1111.92	1412.55	1409.26	1410.95	986.788	1551.53	1722.09	1416.18	1446.49	1905.31	1970.46	2710.34	1727.92	1638.55	1556	4521.08	3555.84	4267.25	5248.99	3815.62
Pde9a	E13.5_SM	161.58	253.645	83.2832	136.094	142.133	135.954	113.915	68.0034	88.506	59.142	140.735	121.319	170.877	114.482	161.868	188.632	232.239	89.5046	231.531	140.949	820.467	845.57	1092.93	969.66	872.904
Dnah7b	E13.5_SM	500.675	393.184	538.992	350.697	353.847	444.455	378.542	527.79	320.323	364.163	657.873	534.166	530.704	623.974	497.297	435.909	602.568	561.631	548.01	755.584	1363.6	1239.46	1958.59	1579.95	1547.92
Rap1gap	E13.5_SM	217.3	138.326	210.009	139.242	122.047	224.891	235.781	167.717	164.824	207.303	58.0909	131.398	38.853	124.437	197.372	52.5901	32.7608	44.6377	19.5872	55.2566	466.485	682.322	584.083	696.354	507.687
Shtn1	E13.5_SM	57.344	51.2479	51.2178	34.674	33.3277	46.462	71.0688	103.301	75.1349	83.1909	115.705	70.2778	90.9427	128.738	85.5165	129.648	108.429	160.821	203.443	133.977	406.947	507.44	459.501	421.263	557.275
Gk5	E13.5_SM	662.408	689.787	593.482	743.653	647.14	666.792	658.195	640.935	654.707	645.798	615.607	567.702	548.81	653.34	571.88	419.747	473.07	417.627	481.88	548.512	1255.67	1352.88	1435.72	1380.68	1391.71
Dlx1	E13.5_SM	29.1904	23.5012	26.5887	24.7747	55.0919	32.6507	52.1489	57.4674	48.5469	52.6867	22.2728	5.24402	3.77599	10.9627	7.65085	6.044	14.7137	13.7621	20.1811	9.60992	695.88	755.393	732.637	741.155	627.689
AW549877	E13.5_SM	1221.59	1465.53	1230.66	2018.94	1530.31	1173.75	1593.35	1278.81	1433.62	1263.35	1479.83	1556.16	1327.45	1161.86	1788.32	1874.4	2102.68	1247.29	1373.42	1418.45	3862.03	3294.21	3644.9	3918.56	4717.83
Kdm5b	E13.5_SM	3944.16	5154.78	4455.79	5323.66	4729.18	5730.82	4743.26	4557.25	4845.46	4500	5231.93	4409.58	4251.77	3844.56	5970.6	2961.48	4495.38	2585.9	2710.72	3522.09	11181.5	8463.4	11241.8	15087.7	12181.3
Zmym6	E13.5_SM	991.594	1304.91	1001.74	1134.81	1084.3	1168.19	1284.48	1253.56	1148.08	1226.51	973.81	1039.23	1101.59	800.507	1033.46	1018.63	967.994	850.812	796.497	885.004	2644.64	2712.24	3356.78	2822.2	2899.9
Asb4	E13.5_SM	623.337	1001.73	596.875	638.731	702.947	745.961	846.436	786.703	643.538	760.952	510.214	604.449	612.054	522.467	560.229	817.332	942.27	653.885	804.255	514.624	3842.51	3188.99	3181.13	3336.86	3975.16
Hectd4	E13.5_SM	1003.13	1071.55	1478.69	2165.9	1403.76	1177.44	890.619	870.717	1463.17	719.868	1645.1	1915.84	1347.78	1803.05	1436.01	1876.67	2523.81	993.318	1092.17	1207.08	3576.28	2111.71	3412.59	5063.15	3845.3
Nmnat2	E13.5_SM	48.7809	58.7233	54.5034	33.2387	59.6682	140.525	60.2767	73.0844	58.7806	61.2458	35.4422	46.3463	47.4234	47.1241	47.4488	36.4667	120.984	79.9132	105.144	62.0841	328.375	186.545	169.102	427.895	285.975
Tmem108	E13.5_SM	123.681	86.6424	105.413	87.655	93.2437	78.6499	122.621	182.557	119.931	86.9986	88.3901	16.0592	31.8845	71.6418	29.8381	31.5237	31.6896	39.7069	61.2233	53.1597	390.869	427.922	455.415	453.071	432.234
Hic1	E13.5_SM	2179.35	1694.53	2479.67	1916.98	1772.6	1634.74	1605.21	1672.03	2315.28	1622.15	785.106	666.43	771.457	667.864	604.813	658.705	1064.34	717.211	729.548	781.051	5458.26	6572.98	6516.55	7682.32	5706.97
Olfr78	E13.5_SM	2.87859	0.690278	6.11263	0	1.26734	1.94409	0	11.4082	3.14975	0	31.0564	6.49577	20.9966	15.405	8.24301	31.9279	18.621	37.305	12.2155	25.0065	324.231	524.541	422.599	366.012	680.814
Adamts3	E13.5_SM	199.021	179.197	194.485	211.48	112.489	381.309	172.57	247.683	319.113	199.237	282.71	272.128	123.565	129.569	145.051	93.6268	152.142	80.7188	205.399	254.993	695.433	424.448	617.83	674.548	644.562
Trp53bp1	E13.5_SM	2843.58	3189.62	2576.01	3428.31	2824.64	3284.73	3225.75	2689.03	3158.41	2610.86	2391.47	2819.73	2310.77	2230.69	3001.36	2028.66	2704.41	1492.9	1787.78	1906.11	6231.41	4910.98	6943.78	7488.34	6421.29
Snhg11	E13.5_SM	359.187	292.308	212.332	290.434	257.337	305.822	247.826	360.334	340.82	272.346	243.06	226.182	217.648	401.071	165.822	121.56	143.926	283.995	249.077	270.097	807.139	807.543	1159.08	1217.76	982.429
Csrnp3	E13.5_SM	171.117	153.094	88.1524	66.5854	104.115	168.025	153.107	336.416	154.863	144.026	63.998	52.0178	50.8342	119.767	23.6868	146.15	192.359	194.155	256.683	170.499	943.705	597.403	961.672	1000.63	779.643
Prrt2	E13.5_SM	298.236	193.224	251.088	229.766	143.052	176.515	139.254	272.779	187.865	177.573	305.719	180.887	251.236	150.376	204.432	167.866	229.973	102.42	127.194	142.672	423.86	533.971	597.294	812.739	443.334
Nyap1	E13.5_SM	139.649	165.019	183.124	161.073	119.138	198.998	199.681	158.262	183.282	175.394	148.996	112.123	137.808	108.793	161.558	40.6583	44.4882	53.5951	46.9049	70.9305	492.961	613.421	556.597	676.546	486.133
Olfr1033	E13.5_SM	25.2097	21.489	64.3314	19.7978	38.9233	127.252	143.3	84.8609	61.4599	79.942	372.358	188.407	318.426	352.607	368.875	163.536	158.599	158.437	143.295	242.233	524.048	812.649	693.379	686.337	702.592
Epcam	E13.5_SM	18.001	19.2381	36.0945	23.4699	25.9343	31.2441	79.5282	62.1226	43.564	40.0619	330.89	79.5698	24.6293	112.214	94.6534	37.8756	6.7018	20.0205	20.6849	14.9387	376.92	515.493	403.934	562.193	360.359
Dipk2a	E13.5_SM	1008.65	1281.12	992.633	929.191	1011.94	729.456	717.666	834.654	833.67	951.577	1642.6	1811.02	1694.81	1589.28	1562.19	1859.12	2216.65	2132.08	1827.74	1919.66	4073.67	4111.61	3851.94	3795.23	4206.15
Onecut2	E13.5_SM	58.5804	28.6057	55.0601	45.7396	45.0169	24.3891	34.1746	65.9692	43.5093	55.4573	31.8729	31.2452	19.3832	51.0799	14.1283	14.621	28.749	25.1768	25.4276	27.1699	403.114	250.478	390.374	366.994	598.744
Ccbe1	E13.5_SM	185.916	100.835	159.445	152.973	209.93	330.156	315.746	270.011	370.956	291.626	187.351	179.127	393.152	311.462	217.451	72.6377	82.4513	29.2163	70.3511	109.723	566.287	379.226	802.728	921.178	693.428
Lrrc4b	E13.5_SM	55.4803	63.0899	69.0937	35.7172	33.3435	65.079	65.1459	120.594	94.532	45.1252	60.9943	89.5613	40.0658	43.1184	64.9991	42.2049	49.6182	82.5687	94.7774	68.2576	438.226	416.843	405.132	440.942	440.593
Dync2h1	E13.5_SM	1242.19	1604.26	1225.83	1612.07	1596.58	1565.94	1735.72	1587.27	1379.14	1502.77	1948.83	1726.47	1586.71	1143.72	1402.48	1351	1638.08	1517.55	1332.45	1486.33	3377.62	2488.35	3677.37	3033.33	3516.86
Flrt2	E13.5_SM	4823.65	4842.68	4724.87	4999.03	4314.95	5111.09	5364.15	5544.54	4547.37	4964.61	5957.67	6230.21	5209.41	4971.2	5551.62	2952.78	4258.06	4199.77	3220.52	5606.23	11308.5	11823.8	11268.9	10742.9	12598.3
Sned1	E13.5_SM	80.7433	149.713	46.8877	117.226	111.597	637.153	558.154	441.061	340.207	215.304	2975.91	1952.65	1743.39	1221.93	2068.75	1518.69	1676.33	1859.53	1419.24	2679.38	4830.41	5233.42	8025.17	9886.28	7711.27
Tnrc6b	E13.5_SM	2953.96	2935.27	4277.25	4990.11	2701.88	1641.13	2832.13	2668.35	2228.93	3389.22	3402.95	3227.13	2666	3069.59	3800.63	3545.82	5497.02	4323.41	2092.59	2633.71	9343.68	3277.98	10773.7	7435.23	7486.25
Palm3	E13.5_SM	104.882	102.664	102.973	73.6753	73.1315	77.8049	91.6523	81.9992	83.5619	79.12	46.5746	60.1363	45.073	48.8657	70.9951	32.9135	36.742	52.0544	43.6519	33.6872	508.926	992.787	751.62	881.144	873.308
Pthlh	E13.5_SM	0	3.49356	5.30375	0	0	32.9876	45.9647	34.8863	5.40006	14.3271	184.157	122.855	43.2628	134.92	49.0982	56.7414	71.6479	62.8248	91.8518	141.172	262.757	327.042	381.531	297.036	261.278
Pdp1	E13.5_SM	587.18	738.378	751.752	689.972	716.621	865.14	826.915	821.283	861.266	900.779	608.441	601.825	652.058	660.211	627.986	792.897	753.957	624.19	748.728	712.071	2078.45	2477.67	2155.37	1877.72	2404.84
Prokr1	E13.5_SM	367.858	243.009	333.326	287.491	230.786	1525.79	1342.65	1389.92	1217.12	1098.9	419.719	363.852	369.377	424.103	516.909	290.008	373.173	182.952	390.818	255.815	3380.17	3197.5	3020.43	2601.91	3208.98
Proser1	E13.5_SM	136.974	175.4	162.43	209.155	210.087	183.462	182.945	173.081	171.723	177.143	214.113	189.048	223.463	188.844	229.275	198.496	294.476	181.274	173.837	170.25	523.637	344.616	467.549	502.362	534.468
C77080	E13.5_SM	112.202	129.589	169.043	360.77	242.709	151.609	123.878	215.403	152.505	74.753	236.534	196.676	187.217	250.329	201.192	185.671	227.613	124.07	90.928	90.6557	578.617	275.104	552.662	628.71	451.458
Armcx6	E13.5_SM	591.42	720.58	780.32	650.289	767.857	929.894	871.933	742.331	842.559	951.236	910.422	889.907	818.557	750.506	888.872	633.116	649.9	597.632	622.877	666.611	1887.78	2854.31	2243	1997.27	2220.63
Pcdh20	E13.5_SM	421.427	304.147	457.404	406.606	446.545	604.196	594.062	447.663	508.466	547.462	653.041	660.896	835.722	803.042	673.202	440.815	317.555	178.951	430.33	305.7	1638.05	2383.91	2068.43	1924.84	2202.71
Kcnb1	E13.5_SM	610.388	639.441	655.51	786.941	465.796	454.087	697.831	716.666	562.607	389.354	302.394	276.609	180.387	344.269	274.587	374.189	531.791	165.744	371.978	199.139	1733.48	1599.09	1875.48	2802.07	1820.66
Ccdc126	E13.5_SM	190.664	206.381	170.619	171.957	191.271	187.364	202.211	161.586	186.479	194.552	179.865	204.308	188.997	175.307	207.901	148.468	155.65	154.869	200.381	140.038	548.444	725.955	697.342	556.299	720.328
Minar2	E13.5_SM	19.2583	12.6098	21.434	24.1176	23.2535	38.5935	33.6595	54.2987	32.8182	52.2164	137.029	152.736	63.4332	86.6086	122.51	39.5138	42.3645	36.1106	36.3355	58.0353	356.229	183.737	238.72	376.382	292.801
Hs3st1	E13.5_SM	121.001	120.135	93.6268	83.5048	68.3756	117.157	111.185	124.104	120.4	86.1909	127.33	178.334	146.515	168.135	168.753	143.228	156.505	150.929	155.027	255.598	547.663	762.046	557.687	602.926	475.682
Gprc5c	E13.5_SM	721.823	738.647	589.684	648.923	583.753	475.384	509.39	360.143	659.324	563.918	629.676	328.619	607.897	481.493	493.936	468.677	522.206	482.365	498.92	435.011	1129.64	2116.99	1601.87	1757.74	1525.91
Adnp	E13.5_SM	39.808	82.0999	62.6451	150.987	106.381	92.7864	63.5885	61.199	24.6129	32.8614	187.202	93.7975	121.018	63.8093	206.506	62.2363	236.89	71.8966	73.7983	96.7321	417.95	152.449	329.113	760.912	349.468
Eml5	E13.5_SM	129.903	86.4119	120.206	137.766	183.14	110.887	95.1512	123.409	105.047	125.509	154.803	161.362	202.509	213.531	165.448	258.53	116.697	166.809	225.256	229.913	1865.45	1258.5	2115.64	2016.54	2408.46
Islr2	E13.5_SM	54.4791	110.824	71.2787	17.7571	88.6535	64.2209	64.0582	176.269	66.7896	40.0543	30.774	47.0899	70.9714	165.811	74.8129	60.7437	87.8946	35.4225	119.714	123.854	1364.07	909.991	1230.87	1124.25	989.951
Mical3	E13.5_SM	771.32	789.109	742.377	719.713	575.836	632.347	699.247	575.794	605.087	617.576	926.468	856.287	783.782	906.303	658.357	1114.4	1234.56	1076.29	985.31	892.374	2372.17	2096.12	2410.17	3089.13	2689.67
Kctd14	E13.5_SM	59.3532	57.7227	47.7636	62.4674	54.4088	6.3698	52.5356	38.7911	45.3788	23.9723	79.134	64.6734	45.9123	85.8163	49.278	144.552	106.822	134.51	73.3563	71.3065	233.179	301.404	254.407	241.563	221.228
Fam229b	E13.5_SM	56.0625	100.235	65.1736	59.1848	73.0973	113.184	105.066	79.4206	94.8618	123.031	75.5275	95.8517	76.0339	75.0746	101.242	93.5201	75.1433	74.9839	99.8636	78.2722	174.688	253.831	215.888	169.091	245.514
Xkr4	E13.5_SM	95.45	90.8737	96.8442	100.101	71.2863	118.493	86.7726	74.777	73.7507	83.2899	115.712	103.176	128.32	109.442	111.642	139.143	140.397	100.447	116.154	95.8607	307.675	285.387	299.806	346.561	412.533
Pard3b	E13.5_SM	956.876	952.694	724.299	767.823	757.765	886.604	977.279	1001.38	788.505	783.023	1794.08	1634.18	1437.57	1103.11	1254.01	1022.04	1123.12	1037.44	882.145	1057.97	2916.24	2669.6	3510.14	2994.68	3219.91
Il1rapl1	E13.5_SM	83.8876	31.2538	74.4511	43.8696	58.42	220.652	220.435	212.045	127.146	242.148	70.7288	59.3463	60.0681	76.9284	56.3229	32.5059	30.5439	32.6383	39.8161	25.2988	622.459	803.242	967.83	667.748	850.64
Bmpr1b	E13.5_SM	128.839	162.952	177.185	139.221	184.877	96.2249	83.0967	108.588	97.7547	98.8581	144.123	98.3611	100.74	85.7577	74.5486	222.246	379.495	187.208	180.468	120.618	573.824	406.845	494.495	431.368	697.751
Robo2	E13.5_SM	3843.9	2993.29	3470.06	5039.87	3369.33	2661.35	3334.23	2720.23	3173.88	2861.51	3319.04	3146.68	2853.87	3320.13	3755.42	662.192	685.371	604.199	556.838	561.321	17461.4	19069.2	23280.4	21211.2	19688.1
Adarb2	E13.5_SM	393.266	203.197	416.113	273.158	456.082	307.867	314.455	367.988	274.771	242.898	541.078	303.375	417.172	551.472	332.308	154.747	203.617	329.221	290.092	307.55	1946.44	1140.36	2138.04	1478.61	1596.5
Dlg2	E13.5_SM	174.2	322.193	186.254	262.842	147.428	426.944	337.255	202.017	168.767	167.384	289.964	323.434	333.542	268.692	218.046	156.787	165.306	108.925	117.545	94.3849	1220.11	742.882	1328	735.208	1154.53
Map1b	E13.5_SM	8433.59	7872.17	7275.18	8629.99	8071.66	7989.39	11894.3	11335.1	9989.34	8792.13	7302.17	6587.49	8713.73	6899.22	7634.45	5990.13	9214.88	6486.55	6480.65	7550.76	22482.4	16031.3	24565.7	25223.8	22653.6
Nrk	E13.5_SM	2649.51	3595.36	2249.93	2465.92	2845.03	5648	5514.33	6755.06	5251.79	4324.99	12681.7	12031.9	10514	11897.5	11570.6	20997.5	30814.7	17016.7	16445.9	13043.4	51352.6	42826.8	51864	55911	55721.9
Mllt11	E13.5_SM	203.58	147.52	189.85	152.418	145.667	120.284	134.751	167.807	153.212	172.15	159.33	203.074	148.171	282.35	179.675	216.28	268.859	210.956	234.357	237.353	521.201	560.286	561.713	600.652	723.386
Nrd1	E13.5_SM	1725.25	1885.56	2350.06	3107.14	1822.79	2511.56	1571.42	1310.24	2586.66	1436.69	1831.68	1040.01	1996.33	1871.17	2078.56	3743.23	5362.05	1106.51	587.536	1064.03	5914.07	4663.5	4351.38	6494.36	5815.79
Nt5dc3	E13.5_SM	70.0752	96.7247	66.577	82.9125	78.258	199.302	79.9744	88.9839	91.6375	244.037	246.598	182.236	218.7	429.235	218.619	194.917	176.579	182.867	180.351	205.42	1257.72	310.934	323.989	751.648	701.581
Dedd2	E13.5_SM	142.426	155.726	141.441	102.53	139.266	147.883	107.353	137.873	144.556	94.2302	121.164	113.052	121.632	151.363	76.0921	176.961	115.236	118.232	153.898	111.867	262.597	279.848	298.118	303.388	292.41
Ankrd24	E13.5_SM	300.941	316.265	267.643	315.837	275.825	273.655	350.995	315.28	278.569	500.101	403.468	341.127	335.875	341.869	357.393	323.053	232.347	301.097	277.503	342.54	830.629	854.627	940.776	855.95	671.155
Ep300	E13.5_SM	2033.22	2378.96	2034.36	3041.81	1789.37	1827.7	2513.05	1864.01	1776.53	1722.04	2622.51	2762.94	2665.97	2309.75	2569.86	2369.13	3913.36	1890.37	1669.52	2160.66	4798.84	3522.93	4986.18	7483.74	6465.98
Ntrk2	E13.5_SM	451.049	456.406	371.027	523.406	308.533	813.394	487.795	824.228	663.134	483.113	735.12	755.012	602.361	752.788	679.39	2238.93	1757.36	1394.36	1806.66	1713.32	6422.42	6724.67	6720.24	6617.64	6921.92
Map6	E13.5_SM	45.0379	35.2026	27.8033	20.1405	25.9289	10.7315	26.3353	28.911	17.6135	30.3645	61.0424	29.6969	74.8702	67.3199	47.1115	121.854	107.71	133.601	119.136	88.9353	273.852	276.783	305.815	300.985	344.539
Pcdh9	E13.5_SM	1236.47	1748.93	925.845	1304.34	902.532	935.876	817.908	961.035	724.994	537.689	827.945	716.708	706.552	741.441	843.032	366.044	451.285	564.881	417.043	630.564	3273.81	3813.47	4011	3166.47	3726.61
Maf	E13.5_SM	1427.29	1397.55	1162.34	1159.52	1135.8	2241.45	1875.22	2091.85	1687.9	1815.22	2066.79	2006.06	2659.04	2605.39	1745.9	2493.39	2909.53	2898.03	2814.88	3552.47	6363.79	7628.73	7881.06	7594.76	7680.4
Abcd2	E13.5_SM	645.682	433.963	663.328	406.285	819.717	387.755	201.689	321.055	300.765	298.632	247.645	235.751	180.527	235.04	428.585	272.895	411.799	398.02	794.19	667.017	1300.27	1232.45	754.179	2368.72	1704.95
Grik2	E13.5_SM	79.1629	118.244	45.2164	27.6898	46.531	49.582	103.083	48.8048	56.0284	66.3524	242.964	145.078	111.907	141.219	93.5816	66.3395	88.6578	80.7303	78.1342	62.0311	459.282	296.871	487.397	325.681	490.574
Pla2g4a	E13.5_SM	291.468	312.252	219.613	186.792	144.519	198.609	243.128	671.555	380.041	128.419	416.166	343.371	503.434	483.564	433.396	653.354	561.094	799.598	535.99	630.148	1924.57	1793.96	1557.97	1980.63	1758.39
Kcnq3	E13.5_SM	120.454	75.689	119.187	109.746	125.876	99.0615	100.289	126.981	77.8052	59.8818	222.027	161.104	133.21	186.996	165.225	74.1566	126.383	162.853	140.574	172.245	283.895	545.557	420.128	376.963	534.517
Grm7	E13.5_SM	12.0732	8.96573	7.97757	22.5966	33.0252	32.5932	92.6363	109.767	60.2748	24.5527	134.664	230.463	66.8631	55.7934	189.203	9.28304	24.9571	8.88249	31.3735	84.235	493.733	530.838	534.107	675.178	580.941
Scn3a	E13.5_SM	112.389	131.309	82.8926	71.5576	46.1664	261.615	66.733	104.044	67.728	120.946	395.038	342.647	460.888	251.627	142.479	97.2355	385.443	189.962	233.114	137.776	709.895	684.873	991.463	658.959	654.18
St6galnac2	E13.5_SM	68.4903	50.06	44.7405	52.991	68.2131	53.4921	65.8351	89.1628	77.4285	126.524	113.804	86.0112	83.911	132.202	66.4807	68.4539	56.3345	63.1933	107.797	159.64	132.375	234.066	244.332	184.917	211.28
Tmem178b	E13.5_SM	63.7806	31.4086	35.9582	25.5286	20.8331	29.3643	39.8698	45.3552	28.9566	19.9312	45.3304	59.567	51.1652	61.2176	47.228	65.0729	166.053	59.8584	80.6155	65.0418	295.659	191.35	344.544	447.397	307.705
Mab21l2	E13.5_SM	616.431	1444.15	229.708	549.032	369.759	28.9125	70.3634	120.708	86.553	46.4543	9.13467	2.4109	4.86075	8.15143	2.02457	5.64083	22.8713	5.31674	36.9665	15.7233	1713.76	1687.23	1503.19	1756.19	1600.52
Camk2b	E13.5_SM	128.322	48.3171	106.01	58.0156	64.6561	73.175	79.4353	101.038	116.041	71.7354	102.61	100.198	78.5977	126.59	38.0828	231.831	238.911	194.068	290.879	54.6634	835.086	908.347	1003.5	1352.3	761.131
Adtrp	E13.5_SM	10.5542	1.26543	2.4014	3.07138	3.33124	5.06494	8.25604	10.7135	4.33064	2.18068	9.63523	7.44261	3.00109	10.7846	40.7129	59.2194	4.05025	18.0814	8.6422	8.41343	379.966	592.609	428.162	435.171	529.434
Adamts17	E13.5_SM	826.585	1324.9	1363.55	1840.67	1032.67	2103.52	1983.58	1522.76	1805.61	1550.74	2592.34	2498.03	1912.37	1957.25	1912.2	810.859	831.563	493.514	970.805	1332.05	6053.75	4794.39	6134.23	7125.23	6385.78
Gpc6	E13.5_SM	1070.58	1229.89	804.45	1434.35	866.76	1287.05	1258.63	1066.63	1306.57	1203.3	1324.28	1171.64	1111.04	1187.94	1667.71	1086.94	1645.44	1166.83	978.287	1017.64	5203.08	4114.77	5841.02	6388.17	5493.88
Col13a1	E13.5_SM	122.939	167.466	114.853	135.427	96.7862	47.3863	63.9051	61.6417	62.3616	33.9854	145.206	194.866	147.805	103.606	158.278	51.2934	50.1131	63.425	61.9116	76.6749	713.023	1114.78	895.226	773.851	708.267
Ntrk3	E13.5_SM	296.595	149.939	147.198	135.7	139.263	305.236	436.363	421.953	477.192	194.829	868.389	630.147	609.541	511.295	1474.27	956.065	461.234	673.224	601.705	524.272	1322.9	2542.31	2256.14	3749.84	1772.51
Pde1a	E13.5_SM	56.7305	68.2451	76.9265	63.6874	77.9025	69.3587	41.362	79.1251	40.674	44.052	139.928	138.891	119.067	149.23	118.713	666.655	396.027	425.557	573.148	347.27	1119.69	1524.63	1281.69	1331.25	1290.72
Zfp941	E13.5_SM	143.895	170.574	131.499	124.444	154.467	110.031	136.728	112.874	120.022	150.439	44.5944	23.7713	47.3672	46.1243	44.677	24.366	21.4771	46.724	30.1963	28.4743	360.36	340.783	377.755	266.427	358.897
Kcnd2	E13.5_SM	177.871	308.532	110.12	201.593	119.107	157.421	181.315	199.82	202.785	279.047	89.9273	86.5252	72.6868	92.8725	89.8159	95.599	118.962	66.2547	89.5051	109.725	341.982	506.627	446.004	442.525	427.39
Plac1	E13.5_SM	129.006	106.872	136.019	104.019	102.709	164.469	104.874	121.217	103.609	107.376	140.763	64.6177	94.2666	92.5643	119.304	62.6658	87.7211	116.255	89.2884	100.86	280.015	495.733	363.52	215.118	381.863
Cxcl12	E13.5_SM	451.763	403.927	545.092	521.431	469.485	853.797	1207.52	1257.07	1271.84	1025.15	2534.14	2867.24	2611.43	2524.22	2454.72	2579.45	3768.72	3369.62	2353.4	3266.04	6062.29	6312.62	6532.41	6995.42	7369.85
Hipk2	E13.5_SM	609.253	555.592	579.844	637.699	562.285	629.677	496.776	780.766	505.46	379.078	903.151	788.861	567.487	726.519	554.671	852.318	1125.52	899.212	784.153	1127.86	2454.93	1888.97	2977.56	3444.76	2820.79
Sec22c	E13.5_SM	178.668	218.259	222.624	447.137	136.461	140.205	248.253	171.948	111.895	197.513	242.092	213.779	217.21	184.05	257.684	211.467	289.921	174.265	206.039	316.926	377.07	506.711	516.472	634.203	1085.94
Pclo	E13.5_SM	71.9372	34.3002	36.2689	23.6892	39.6252	27.5623	43.6009	47.9662	27.3983	34.1884	43.6627	43.3381	42.1672	92.2875	52.1737	67.0142	118.345	85.5638	79.0431	66.9739	506.278	414.698	649.162	571.02	792.573
Cyp2d22	E13.5_SM	189.877	167.362	133.887	158.849	173.897	260.822	261.351	216.938	202.976	244.086	159.346	363.203	365.936	210.922	270.758	171.465	126.991	162.697	301.745	195.404	1030.87	1423.56	1315.04	1318.99	1393.86
Tubb3	E13.5_SM	176.935	101.812	205.351	131.843	164.672	94.6956	132.444	119.686	154.118	117.802	14.045	12.5463	13.7975	22.0364	22.9873	23.4839	19.369	23.8954	25.0988	17.8526	3575.45	2763.94	3250.43	3253.9	3121.23
Dgkk	E13.5_SM	26.1825	16.0729	26.6887	30.8164	30.013	27.2518	18.6686	23.5025	18.4474	18.1768	41.1288	34.7362	27.5132	29.9606	28.7768	23.2239	37.8653	13.6792	30.0032	27.7434	695.533	291.449	613.029	801.184	767.25
Syt9	E13.5_SM	43.2477	48.8298	38.5481	39.6749	39.4464	109.152	88.0223	124.294	111.401	131.269	72.3275	153.843	118.814	115.412	108.044	73.8908	92.8693	94.7374	87.5041	122.869	477.368	312.443	542.394	587.389	442.833
Sox11	E13.5_SM	2696.83	4257.14	2353.63	2605.46	2612.86	1910.11	2267.86	2742.02	2284.24	2374.1	1426.31	1285.86	992.175	1182.96	1168.62	1202.3	1649.6	1358.22	1232.73	1123.37	7732.7	5211.83	6541.4	6960.44	7078.33
Brwd3	E13.5_SM	949.499	1148.62	1008.9	1585.64	942.253	1060.96	1236.21	1160.25	1061.47	930.595	1260.87	1224.78	1010.78	780.891	1222.78	1276.76	1750.16	1284.15	1004.31	1306.01	3487.31	2169.81	3076.09	3111.67	3405.11
Aox3	E13.5_SM	3.81606	12.652	9.66905	0	21.559	5.42956	14.0673	14.5221	15.7224	50.0011	58.3952	15.6634	67.9591	89.0656	33.4048	68.9404	31.2089	50.8845	45.0097	61.1645	884.62	1012.47	711.649	772.023	750.302
Lgi1	E13.5_SM	19.6987	44.3014	23.9953	24.2013	20.1494	65.5047	36.0007	28.4809	34.6007	15.155	142.139	161.262	185.429	204.792	92.4471	216.608	264.207	210.527	289.089	336.366	533.017	579.423	679.472	673.481	548.502
Capn6	E13.5_SM	4761.26	5053.53	4480.59	4459.19	5849.19	6970.37	6395.64	10087.1	7290.2	6622.22	3359.24	3580.8	2587.57	3318.12	2945.97	14638.7	19005.3	9837.8	12599.7	6053.94	27920.1	29110.8	28432.6	26266.5	27817.4
Syngap1	E13.5_SM	459.604	334.249	488.4	598.586	410.338	362.533	451.752	404.642	338.892	461.828	584.871	473.85	437.761	534.679	468.261	225.041	371.466	216.034	170.108	217.23	854.457	950.507	1377.05	1741.96	1217.04
Pex26	E13.5_SM	230.739	289.78	272.34	285.764	251.344	314.295	295.131	270.315	329.931	261.537	222.365	236.584	226.561	251.782	214.497	256.458	209.846	244.521	270.677	234.428	588.125	638.007	590.547	675.614	602.553
Syt11	E13.5_SM	178.742	228.776	170.079	226.726	167.767	290.023	255.025	207.926	163.446	200.758	253.024	214.212	272.974	285.06	423.67	273.44	224.412	392.135	248.362	297.49	1131.14	1109.8	1013.21	1133.66	1026.05
Nr2f1	E13.5_SM	54.0528	133.373	115.266	163.836	102.329	180.812	112.094	127.602	137.222	121.089	249.282	211.848	198.631	210.709	169.848	159.443	315.794	185.377	244.454	207.047	3783.55	4278.7	4756.29	5622.06	4534.15
Gprin1	E13.5_SM	132.483	105.754	123.067	104.163	87.6562	138.609	152.201	139.324	143.216	127.393	85.8007	87.6006	99.8352	129.505	114.606	59.4039	102.619	93.2201	90.9747	96.6202	343.389	324.998	366.596	463.485	388.022
Ank3	E13.5_SM	1680.14	2112.45	1695.14	2407.18	1902.37	1897.95	1522.22	1703.46	1463.22	979.804	2106.3	1578.79	1457.7	1654.69	1355.75	1837.04	3105.32	1860.16	1790.03	1713.64	10640.6	8628.6	12530.8	13290.2	11456.3
Prss36	E13.5_SM	42.7807	30.8084	37.4324	260.596	32.7642	48.8076	39.4058	137.241	44.9023	52.0851	50.2031	42.0432	46.954	48.65	44.347	58.76	51.4608	55.0098	66.1594	49.8451	48.0381	72.7109	709.193	1795.27	885.888
Zfp804a	E13.5_SM	14.4218	3.05236	2.89622	7.515	15.7676	9.10854	16.6733	10.5487	11.7666	8.5191	63.6453	49.3691	45.9429	53.7363	49.7496	20.0322	13.3285	5.93855	25.2949	32.1953	474.265	312.527	409.469	422.012	599.271
Gspt2	E13.5_SM	145.833	166.011	134.375	108.891	157.761	86.4793	122.369	101.858	117.379	114.918	112.975	100.439	126.055	141.122	109.865	131.041	154.815	122.403	110.431	152.19	344.035	340.878	363.379	341.428	341.75
Rybp	E13.5_SM	2323.09	2051.51	1949.06	2569.29	2396.29	2334.81	2202.22	2311.43	2233.35	2275.09	1731.09	1598.97	1430.98	1609.92	1959.17	1035.23	1421.42	1074.6	1163.08	1285.96	4797.47	4283.4	4858.93	4872.15	5490.85
Klf14	E13.5_SM	227.931	208.413	201.629	192.276	178.192	491.108	386.362	455.092	431.209	485.911	281.165	326.873	308.919	351.755	278.53	729.926	596.79	614.843	678.408	548.623	1362.61	1682.45	1459.83	1300.03	1548.17
Trim68	E13.5_SM	226.321	342.582	246.04	291.298	248.633	192.067	306.273	227.904	251.786	222.405	208.676	225.432	235.568	268.341	177.83	290.121	219.402	173.305	178.904	208.118	531.899	553.671	621.459	555.913	542.505
Kif5a	E13.5_SM	40.2728	26.5724	40.4968	30.7811	66.3882	85.4814	97.8256	145.569	169.748	108.231	76.3864	62.6764	69.3398	57.4677	83.699	75.5184	60.0227	54.0371	79.9715	56.0887	724.515	754.171	850.043	806.129	876.759
Syndig1	E13.5_SM	170.108	84.5241	161.347	120.802	160.137	220.926	92.0032	94.9205	131.623	112.365	108.592	88.5054	128.818	241.488	83.493	54.0582	170.423	117.984	95.4215	123.665	603.682	921.997	932.801	778.174	583.372
Plxnc1	E13.5_SM	651.712	640.869	558.278	822.482	889.101	544.621	745.942	706.668	554.598	484.535	851.709	1247.22	703.059	1360.09	1168.25	892.874	876.616	1076.81	820.986	882.907	2610.05	2571.39	3370.25	3205.9	2932.66
Fign	E13.5_SM	245.192	267.17	408.44	227.817	263.916	147.587	205.708	167.721	181.798	113.14	181.635	153.63	184.939	114.203	101.79	194.183	581.914	126.467	96.4656	53.5279	787.006	833.419	1058.27	896.341	884.689
Slitrk1	E13.5_SM	73.4917	67.4276	82.9779	91.4792	81.5931	231.697	178.467	251.448	242.409	224.47	40.9795	19.2278	20.5946	29.0227	17.1559	88.8508	144.737	90.1063	120.018	71.0597	2711.05	3156.02	3337.84	4046.71	3308.53
BC024978	E13.5_SM	123.949	171.829	136.019	142.102	189.723	175.71	81.8032	93.5161	108.164	104.104	214.615	187.353	105.73	160.75	140.523	111.05	303.92	124.694	115.814	152.236	316.151	370.753	272.632	537.153	209.579
Gm20661	E13.5_SM	63.9946	82.2304	80.9024	107.82	81.24	76.3102	84.6714	60.2908	61.5352	79.6265	66.7148	48.7798	75.1608	57.0035	30.0793	42.7536	34.0111	34.4928	24.9321	31.7374	265.164	293.816	372.072	364.728	335.323
A730046J19Rik	E13.5_SM	6.39059	8.17305	7.75495	4.23515	10.3164	15.5203	14.2394	22.9458	13.9851	5.28165	58.0543	44.4644	44.8235	65.0108	51.4676	40.489	74.351	30.4771	67.1288	41.7998	909	1082.25	1125.08	1206.73	1355.89
Zfp703	E13.5_SM	191.601	176.635	180.717	208.564	148.133	108.43	116.279	127.983	142.951	141.673	193.304	217.674	157.982	171.967	178.828	339.919	360.453	117.098	163.707	212.124	601.554	338.186	433.616	813.684	562.314
Cers1	E13.5_SM	97.5007	85.8229	98.7047	94.1696	115.344	118.725	132.868	120.325	119.407	109.691	100.152	141.777	132.831	131.473	126.463	107.298	117.081	73.074	78.0715	58.7201	248.032	229.337	313.116	380.245	266.102
Usp49	E13.5_SM	776.438	717.872	651.114	700.375	561.08	611.253	635.173	864.645	734.898	591.071	473.589	478.878	562.717	805.924	924.319	372.079	653.338	479.279	692.556	617.372	1663.81	970.661	2041.17	1616.64	1430.45
Peg10	E13.5_SM	4156.46	4742.53	3861.95	4152.75	4899.23	5684.8	5690.61	5799.12	4626.43	4396.07	6196.78	6612.9	4993.99	4622.02	5979.11	11803.4	17021.5	10326.2	9751.09	8188.34	28757.1	23037.5	27779.2	33109.6	29196.1
Kcnb2	E13.5_SM	131.843	127.387	103.412	104.975	107.504	314.356	360.339	291.323	300.653	245.704	262.527	345.012	296.539	234.952	332.002	285.996	395.496	306.007	366.252	259.914	2328.94	2025.62	2227.32	2042.31	2188.74
Snrpn	E13.5_SM	125.242	89.1081	109.751	91.3113	96.5065	111.904	118.017	158.887	124.098	127.637	100.515	150.749	158.024	104.897	142.416	130.062	152.575	123.368	124.111	108.556	399.321	374.229	302.674	375.739	407.943
Gm42715	E13.5_SM	383.441	593.947	720.322	1271.98	574.693	506.094	829.354	470.407	830.088	434.226	796.779	798.991	653.634	447.278	1374.78	728.814	1687.55	451.667	458.873	583.518	2879.52	965.597	1972.38	2602.24	1369.78
Brd3os	E13.5_SM	87.6528	137.123	131.168	147.792	83.6128	136.849	129.274	105.844	94.3872	106.939	104.831	122.445	119.998	86.4386	151.27	94.761	76.7272	67.5067	79.7172	87.0223	249.98	270.398	239.62	259.431	244.984
Trerf1	E13.5_SM	263.079	174.699	223.343	282.908	177.254	201.765	213.591	185.479	205.892	148.766	313.038	261.979	282.267	329.697	317.888	147.335	309.3	156.361	131.206	170.334	629.035	434.791	797.053	1086.76	776.076
Gm20008	E13.5_SM	510.182	707.99	435.828	610.708	517.694	533.235	574.322	556.436	505.019	595.065	445.083	455.459	374.337	350.594	413.759	410.513	441.149	352.475	373.277	389.784	1315.66	1096.43	1289.1	1116.09	1581.04
Pparg	E16.5_FP	224.542	13.5635	40.6187	52.9541	15.8377	40.377	70.5286	72.2877	73.0656	35.794	1413.19	1113.43	1025.61	1971.04	905.315	4509.95	2896.34	3907.98	4397.53	5182.28	2.1386	17.4441	1.73645	2.68122	10.9955
Sox9	E16.5_FP	52.1898	139.963	41.1012	68.6094	45.9547	99.7737	82.5885	89.8711	52.8328	68.6614	466.711	477.091	346.474	361.042	358.255	858.141	1686.28	1049.47	553.304	1153.68	157.702	99.2459	97.8332	127.071	201.242
Cldn15	E16.5_FP	19.0804	6.44198	13.9713	4.57801	14.7366	4.99311	11.1166	9.47354	13.2186	6.34359	235.651	201.923	147.321	223.32	120.904	985.348	642.218	810.102	910.002	524.983	6.3846	6.81146	9.81268	32.1548	4.63282
Slc1a5	E16.5_FP	584.49	821.831	738.788	679.499	673.924	408.612	509.758	395.315	488.585	447.239	736.1	669.151	706.245	799.976	390.983	2360.01	2040.51	1963.25	1729.53	1783.51	491.395	483.887	488.775	490.581	456.855
Srpk3	E16.5_FP	27.3557	76.2543	75.4387	7.49582	66.4756	16.5742	6.41183	73.8391	15.6909	8.9135	101.297	158.988	68.1787	95.9276	35.7106	560.478	798.836	360.156	401.353	52.2662	82.682	48.1446	5.55172	3.729	50.0348
Cd36	E16.5_FP	815.316	903.709	765.884	632.171	731.115	1348.75	1533.79	1183.43	1134.8	1073.56	4825.5	4139.74	3923.22	4699.79	2418.65	20747	13449.4	18541.1	19303.2	18120.8	326.749	215.119	229.805	162.1	229.12
Lipe	E16.5_FP	284.828	207.236	196.805	245.003	151.836	238.895	188.374	171.039	171.911	175.756	204.516	199.932	119.977	150.62	133.494	2302.82	803.44	490.865	1725.15	475.485	204.615	281.646	178.791	285.044	141.295
Col5a3	E16.5_FP	35.5253	75.4912	42.8634	50.0815	38.593	262.488	163.832	132.547	128.832	90.7403	5087.53	3366.55	3727.85	5060.19	3584.22	10851.3	10610.7	10493.9	10240.7	8886.37	321.048	451.76	366.371	421.882	441.571
Ndrg2	E16.5_FP	145.937	136.307	162.918	111.957	147.967	57.7451	125.053	153.681	105.898	99.3283	664.159	252.164	411.304	438.303	328.336	1157.23	1055.92	1076.11	1241.16	1229.96	108.466	253.14	153.795	298.897	141.557
Hspb1	E16.5_FP	351.572	264.67	280.726	179.542	207.318	124.195	128.187	209.331	153.099	135.597	260.742	320.946	155.105	241.849	323.703	1166.12	1548.88	907.921	1059.08	322.881	84.1882	80.3624	47.0103	62.2183	82.7095
Prkag3	E16.5_FP	100.169	69.7949	56.4198	46.5939	36.2294	53.1136	15.1604	70.4059	68.7559	50.3583	76.7567	140.76	33.32	164.664	37.8231	353.664	409.78	213.6	202.301	87.2395	80.6581	77.1524	32.3377	81.9938	43.3113
Atp1a2	E16.5_FP	233.896	165.345	230.513	132.808	148.581	419.677	395.361	385.008	539.803	393.369	581.244	690.502	524.581	511.729	459.595	2688.06	1956.98	1246.21	1928.06	607.665	408.574	435.468	357.428	543.045	376.089
Casq1	E16.5_FP	121.092	199.212	82.6416	111.643	92.349	119.901	124.572	178.39	116.326	130.878	173.371	335.509	115.967	82.8165	57.4878	1683.83	2041.29	1373.32	1224.97	214.44	109.239	105.721	105.048	84.5215	70.1926
G0s2	E16.5_FP	103.314	169.591	108.569	91.4792	103.164	175.158	112.017	152.016	135.19	116.196	239.047	270.391	216.849	258.882	166.513	3356.09	1369.05	1347.62	2435.96	967.666	200.228	243.861	170.729	172.389	168.366
Steap4	E16.5_FP	91.5984	92.9684	101.59	105.032	96.5987	121.946	131.952	158.709	83.1339	105.633	327.836	346.101	386.452	364.525	248.255	996.479	713.769	960.693	976.419	832.862	26.5789	47.2599	53.7124	38.21	54.7935
Tppp3	E16.5_FP	201.167	135.2	199.953	129.354	169.058	196.796	121.607	217.163	167.017	148.676	1057.13	946.121	886.082	1355.5	1184.69	3321.09	2920.9	2620.51	2823.07	2275.61	251.078	400.759	311.002	246.215	325.092
Lpl	E16.5_FP	4039.14	1172.42	2077.18	1124.78	2515.2	1701.13	1666.27	3379.44	1767.37	1552.62	3842.79	3806.77	3215.2	6320.61	2117.01	10330.1	9037.85	11536.1	9905.83	9265.12	3990.03	4499.29	4157.44	4735.04	4417.74
Lbp	E16.5_FP	80.046	82.5984	47.7235	29.946	47.3132	101.948	74.3781	62.1442	37.9513	39.2634	82.3665	112.264	145.817	162.886	59.1402	251.427	230.509	278.766	223.879	261.954	78.2126	101.421	87.2146	64.2834	59.0303
Atp1b4	E16.5_FP	29.8376	6.13283	16.244	3.3898	31.8059	1.10915	3.79906	16.2614	7.77339	6.16498	397.471	654.071	130.901	177.707	92.8896	3179.21	4171.02	2386.85	2242.86	381.286	10.6369	0.945669	1.91925	0	0
Tnnc2	E16.5_FP	220.824	130.29	208.29	8.26953	96.7574	31.916	28.8465	155.095	51.2629	25.4225	620.429	1327.99	267.417	592.389	255.636	6695.96	8106.17	7579.32	7284.22	1297.13	138.864	8.8085	17.7857	16.5124	12.5587
Jph2	E16.5_FP	48.883	60.1391	63.4459	32.5743	61.7574	30.9701	29.3611	50.5567	46.5111	29.8612	110.166	125.896	102.739	100.769	72.4948	483.64	611.258	341.096	404.901	104.262	39.4514	32.5233	18.1824	39.569	23.8555
Acsl1	E16.5_FP	499.877	413.8	521.87	353.272	527.346	299.278	353.17	404.548	355.962	358.841	532.623	781.176	508.329	771.268	500.994	5317.21	2690.69	3726.54	5582.44	1622.51	375.766	415.09	318.089	492.237	421.365
Unc45b	E16.5_FP	61.4411	41.6722	109.624	23.7533	78.9007	21.1678	15.6876	108.31	84.7432	37.7854	257.057	379.705	120.122	129.019	103.767	1176.65	1603.19	597.255	1019.92	188.869	104.651	24.3344	25.2673	36.6869	17.7786
Aoc3	E16.5_FP	12.3789	19.7896	12.0174	22.1501	15.4417	28.9901	22.066	35.1875	19.565	27.4617	1160.64	902.617	945.697	761.53	797.044	2083.45	2685.64	2227.16	1662.77	2299	229.966	265.481	242.319	335.649	279.819
Trdn	E16.5_FP	23.9911	10.3503	26.9882	2.88586	32.1355	8.30062	5.78553	11.6806	18.1709	2.15573	191.495	95.7809	15.872	63.4453	14.9937	983.688	1203.63	850.861	952.789	136.06	20.5973	5.00848	0	1.73826	1.37851
Slc16a10	E16.5_FP	239.171	239.323	239.002	207.82	216.205	183.385	196.766	201.629	237.275	218.805	336.077	298.597	349.095	430.228	326.02	693.671	743.731	821.201	608.062	801.835	172.342	122.687	192.755	293.143	178.423
Tmcc3	E16.5_FP	359.1	389.248	435.325	465.032	358.8	455.107	399.953	370.411	540.342	265.538	491.524	602.156	488.023	466.311	422.182	1336.76	1367.64	1052.68	1014.98	846.625	109.934	121.877	140.964	354.812	100.525
Mypn	E16.5_FP	46.8114	18.039	28.8273	7.8716	27.89	13.3931	22.2095	41.0405	18.0509	15.9667	129.156	214.425	47.2844	106.806	53.4568	848.842	1058.17	515.97	619.989	109.738	58.2062	6.28455	6.23948	14.8643	7.40664
Gamt	E16.5_FP	291.339	293.581	295.987	251.87	258.738	292.102	268.191	300.784	319.428	301.93	375.43	367.715	318.273	479.22	250.66	987.237	998.918	722.765	767.964	335.963	266.889	432.207	337.878	253.666	284.574
Cobl	E16.5_FP	106.511	90.256	59.9065	34.9982	69.8766	58.8135	51.9126	118.505	40.7589	74.8773	277.234	227.113	256.343	169.375	205.659	1344.9	1744.97	818.415	1036.07	337.68	140.639	66.8877	109.695	123.375	93.8244
Pgam2	E16.5_FP	25.5623	10.2163	22.4894	10.1644	15.9435	13.3032	7.59434	25.814	10.1004	7.04219	111.555	212.708	39.9777	66.1717	46.4217	1123.57	1389.87	799.031	866.572	145.254	27.4649	7.56159	4.79575	4.44303	5.97748
Mmp28	E16.5_FP	157.24	263.119	225.606	200.46	217.427	210.811	133.422	111.067	157.74	116.848	207.196	232.314	212.993	181.977	145.043	561.651	638.19	592.834	517.042	618.621	119.41	47.5555	79.4108	100.138	107.442
Cluh	E16.5_FP	1465.94	1264.91	1386.9	1608.36	1373.57	1247.1	1200.95	1216.57	1285.21	1126.82	1377.51	1443.16	1414.86	1655.16	1169.94	4500.89	3794.49	2955.38	3391.59	1949.72	1289.95	1329.8	1223.88	1779.03	1400.43
Myh3	E16.5_FP	3375.57	2055.56	3405.12	560.722	3232.71	589.761	440.462	2286.88	1302.23	720.049	7642.75	9766.17	2711.3	3900.56	2658.09	38373.7	65915.1	35486.6	33853.3	5334.59	3164.83	325.141	449.831	439.85	296.875
Sptb	E16.5_FP	133.915	119.728	121.399	77.9813	89.6578	108.232	76.6455	65.4465	58.4644	42.0858	155.898	163.589	137.988	153.781	74.7262	437.083	909.762	805.861	560.746	329.563	43.0821	28.5716	46.8347	49.3161	50.0566
Smoc1	E16.5_FP	76.9646	66.6659	93.8629	124.61	67.001	334.348	208.878	137.987	246.528	183.397	135.795	232.862	177.897	199.416	201.792	1384.91	1235.81	889.955	835.432	904.845	353.592	408.482	424.457	508.41	400.584
Asb2	E16.5_FP	28.3379	60.9431	67.478	72.816	55.6492	56.7803	8.39816	136.897	18.0555	20.9252	54.4321	79.05	43.7695	51.346	40.5494	272.672	573.509	329	373.733	84.1487	40.7318	51.1152	69.6971	79.6867	14.5812
Cap2	E16.5_FP	401.127	426.824	340.392	274.676	367.129	319.211	279.71	464.578	365.359	414.854	431.241	403.51	372.767	319.873	336.281	1057.99	1658.69	980.68	1040.33	570.045	206.084	96.5111	168.378	130.177	137.647
Tppp	E16.5_FP	107.008	89.5315	107.928	29.0863	37.3286	51.9113	34.8205	46.2617	27.2863	22.6709	469.223	215.713	240.146	336.131	167.757	794.365	611.983	1073.38	1119.71	1243.35	42.1778	68.3657	27.6965	20.1115	108.13
Thbs4	E16.5_FP	171.092	110.201	61.5162	107.12	43.605	121.643	107.694	144.915	129.324	96.59	82.5641	51.4044	68.7174	68.0096	85.3959	313.753	1048.79	115.826	244.015	155.477	283.973	62.4042	224.355	192.894	75.0384
Ldb3	E16.5_FP	83.6454	52.7475	74.2383	25.9119	85.0076	65.0092	49.1997	69.2195	55.0117	40.6085	509.665	685.323	151.07	423.596	179.664	3884.48	5189.31	2740.6	2940.72	523.412	42.5918	17.0598	18.7566	20.9973	12.9881
Scara5	E16.5_FP	337.711	341.125	439.615	430.82	417.739	346.627	433.543	421.561	564.635	372.273	395.526	342.212	269.955	383.343	449.331	1158.97	1150.45	990.409	944.514	672.828	261.191	356.256	247.969	343.574	646.345
Ephx2	E16.5_FP	121.119	141.259	130.818	131.561	140.765	145.179	117.847	112.531	117.852	137.891	291.102	365.152	256.159	404.745	288.79	1100.99	721.177	1065.56	784.449	800.014	33.6219	28.2939	32.5446	41.7244	45.8053
Ebf2	E16.5_FP	182.238	426.164	135.675	133.413	198.477	468.218	414.137	606.075	435.564	341.631	710.953	721.128	694.774	689.157	542.978	5701.38	4115.62	2908.94	3837.48	3043.96	1111.5	385.653	779.343	620.503	822.621
Srl	E16.5_FP	1340.78	1124.88	1315.05	984.668	1301.56	832.221	773.886	1227.56	832.931	896.002	1306.63	1975.52	402.113	1036.36	850.062	5264.65	6769.69	4670.61	4621.27	1265.93	1071.54	908.549	882.851	705.009	846.599
Tfrc	E16.5_FP	1655.12	2055.14	1137.24	1731.44	1899.54	1137.42	1116.24	1021.1	1148.99	2317.13	1022.09	856.234	628.026	621.334	586.344	7985.98	3211.43	1652.78	3635.18	2344.1	1757.34	1037.2	1274.53	1089	1429.61
Adipoq	E16.5_FP	0	0	0.699167	0	0.845544	0	0	0	0	0.793633	66.7082	123.85	49.1495	98.3846	16.3771	6229.9	1950.31	1690.25	3099.64	1019.64	0	0	0	0	0
Gpd1	E16.5_FP	19.744	11.4586	45.6359	17.7338	30.893	13.2629	7.80796	33.5689	37.1879	15.797	173.607	74.1668	105.029	64.2353	29.3605	6069.81	1640.11	1047.92	3704.21	480.546	17.8865	14.1351	22.9499	11.2954	19.7387
Cdkn1a	E16.5_FP	75.1441	30.7814	92.6939	56.6254	67.0847	59.239	52.9992	55.5138	53.5789	47.2196	145.601	115.55	87.1707	118.108	119.978	409.18	603.839	255.343	257.422	103.884	63.6733	33.2568	18.2427	70.8427	21.7426
Fhl1	E16.5_FP	581.583	577.967	652.058	552.159	595.778	587.052	453.825	569.45	539.287	575.732	1812.82	2284.59	896.601	1385.89	782.897	13085.3	12350.5	6072.37	7523.05	2229.72	760.141	773.764	762.234	723.121	767.162
Myom1	E16.5_FP	334.775	309.845	414.846	273.284	407.407	243.346	345.74	466.32	289.582	341.642	817.546	870.965	386.301	389.306	312.433	3064.88	4142.42	2904.98	2359.07	779.531	488.363	180.981	239.392	157.479	149.089
C3	E16.5_FP	16.0316	26.6347	12.3211	8.49955	2.35273	103.223	18.2576	10.3933	54.4497	11.7775	237.017	280.498	230.97	203.86	164.556	1164.21	572.822	534.084	784.354	413.325	9.6311	15.8077	10.4267	6.68756	19.9937
Dtna	E16.5_FP	175.662	310.618	160.324	120.852	171.959	77.4564	83.5479	183.958	101.239	115.52	221.286	501.752	321.55	297.148	213.295	1027.89	1307.26	644.442	730.575	123.452	251.414	115.389	160.929	137.636	168.443
Myot	E16.5_FP	40.5359	51.3855	46.9199	22.0361	50.3365	7.57282	8.33737	34.5207	8.89373	10.9925	108.846	158.098	41.377	33.9864	38.4073	946.848	1253.15	616.809	761.153	87.6999	38.0413	7.86882	5.98872	23.1178	5.18362
Camk2a	E16.5_FP	68.0432	12.5577	78.0873	18.2201	66.4496	51.0999	37.3392	72.0117	33.2352	50.663	234.182	190.67	104.56	199.829	102.053	776.732	1103.53	463.034	517.031	207.679	106.93	47.5992	65.6548	80.4071	79.4476
Itga7	E16.5_FP	140.838	42.2934	128.193	77.4943	144.388	163.142	88.2809	130.883	140.818	150.767	491.256	582.176	500.919	500.531	469.316	1406.56	1716.9	1164.69	1179.45	584.746	49.3763	70.2242	79.8955	52.9252	66.9106
Mcrip2	E16.5_FP	29.4465	44.7022	30.6235	27.5948	24.4531	38.061	64.5628	23.8219	85.4506	24.6821	62.945	61.2705	101.44	113.076	36.2972	827.242	325.001	202.593	349.637	180.644	63.7319	45.2168	79.9317	39.8674	66.471
Clec3b	E16.5_FP	1.0651	0	1.55099	3.38812	3.75141	1.1086	1.89859	2.86823	6.99257	1.76055	341.496	316.057	296.805	311.123	388.53	1396.87	2011.44	916.965	784.187	703.282	0	0	2.87745	6.22024	0
Pgm1	E16.5_FP	945.109	1210.13	724.111	882.742	736.123	489.77	714.677	644.477	679.215	642.366	1063.71	1104.82	974.748	1235.36	940.251	2953.82	2461.41	2456.83	2580.39	1934.26	579.117	647.556	503.868	504.346	521.561
Casp12	E16.5_FP	35.5324	37.2139	31.9362	32.9265	17.7035	99.2321	69.0923	178.026	82.0541	82.3977	408.461	371.157	379.048	317.504	284.872	853.672	704.872	801.504	680.733	1077.53	19.1233	34.3763	12.9453	10.9923	47.8248
Mstn	E16.5_FP	5.21065	0	5.05482	1.84037	72.4926	10.8391	1.85765	15.5797	9.88258	1.9126	38.9821	108.176	26.0771	43.1632	12.8363	682.274	937.96	729.941	629.943	240.279	74.55	26.8197	29.0925	42.6027	23.3943
Col19a1	E16.5_FP	68.2709	79.2077	52.8441	38.0862	124.805	55.9384	35.4902	42.9831	62.0479	40.1839	58.2149	61.8124	60.9443	65.5422	36.7018	206.454	359.024	289.161	256.292	102.338	100.025	89.0565	97.2054	88.8413	68.9603
Tuba4a	E16.5_FP	270.105	214.405	312.84	199.094	286.409	249.016	234.326	308.995	336.21	328.279	244.895	235.621	236.367	286.8	274.725	723.954	821.285	695.794	588.506	417.641	91.8459	107.657	115.399	89.5846	45.5516
Des	E16.5_FP	588.046	397.35	892.549	372.509	485.849	251	329.912	547.315	462.303	414.93	1122	1627.18	701.76	1098.48	593.904	6213.12	9018.54	4885.39	5477.24	1517.64	528.402	164.293	244.63	343.08	262.214
Efhd1	E16.5_FP	16.7822	5.36578	14.2432	5.3385	13.5988	7.50147	17.4353	15.7114	14.6905	20.4223	238.757	235.82	197.909	391.649	228.918	584.53	726.59	1129.22	629.928	1214.01	12.8464	8.22319	15.7619	7.46738	13.4825
Dbi	E16.5_FP	2135.99	2328.91	2177.64	2014.41	1973.54	2398.93	2065.41	2314.74	2435.92	2589.42	2158.07	2498.51	2328.65	2458.61	1993.44	6775.55	4035.98	7093.29	7344.74	7621.72	1058.68	1142.81	937.812	791.855	902.258
Steap3	E16.5_FP	49.1263	29.6242	58.995	75.0852	38.8539	26.301	42.8906	44.3299	30.8827	26.3407	126.034	139.93	99.7727	98.6558	67.9426	340.638	340.188	219.491	205.984	200.289	53.1303	46.4169	51.4602	47.8731	75.5487
Cacna1s	E16.5_FP	48.9916	83.3218	76.9302	17.646	86.2773	39.7386	17.4098	72.5193	29.7936	20.5469	205.758	207.288	73.269	107.077	59.635	847.081	1119.46	524.4	377.986	116.129	44.3137	10.2432	43.435	26.3814	41.0574
Tnnt2	E16.5_FP	345.962	170.336	387.386	74.1003	370.132	182.195	268.524	373.31	276.387	162.753	221.417	346.736	132.901	181.898	168.126	1342.16	1577.73	1117.61	1377.03	479.066	229.886	79.1676	36.2843	54.9728	47.7567
Tnni1	E16.5_FP	363.612	214.058	498.438	84.961	526.389	159.211	66.4549	282.817	195.087	105.26	355.688	596.592	194.25	270.373	210.256	2468.03	3573.95	1586.48	1751.55	290.354	398.42	92.2133	94.5008	99.5671	55.9519
Myog	E16.5_FP	804.149	468.929	1198.14	360.835	817.807	487.782	336.999	1123.39	616.123	429.574	461.019	645.334	508.808	478.293	415.777	2589.05	3358.68	1963.79	2114.56	498.463	806.228	327.984	427.781	316.343	300.866
Coq8a	E16.5_FP	33.3911	16.6673	16.5787	31.9328	23.0909	30.7655	45.041	58.8697	43.7515	16.6455	100.123	129.341	76.327	62.855	74.4295	644.725	300.304	198.955	328.219	97.0084	35.0063	43.0418	71.7252	100.74	21.1385
Dusp27	E16.5_FP	152.251	129.729	152.832	93.5515	178.993	61.9866	113.741	101.189	91.0342	68.743	169.351	243.669	119.39	126.345	149.129	580.55	671.361	497.474	411.88	121.449	83.1535	41.8227	38.3074	55.8966	33.8206
Ak1	E16.5_FP	99.4937	177.998	133.639	65.1337	105.761	105.739	142.202	202.622	151.678	143.446	568.417	1238.53	555.118	401.387	450.901	2585.91	2016.19	1289.84	1267.1	498.475	170.644	128.818	75.4503	61.1034	155.55
Gsn	E16.5_FP	2260.58	3488.63	2792.26	2929.46	2703.82	3439.86	3359.97	2690.25	3377.47	3241.79	8304.02	7754.92	7726.7	7732.75	6393.24	17644.6	18519.3	20561.8	17302.3	19732.4	3964.67	3442.76	3126.86	3184.27	3060.23
Stom	E16.5_FP	422.013	336.613	341.367	306.62	390.164	434.235	417.038	709.056	428.706	358.1	1125.93	994.641	1149.71	1282.19	838.667	2541.2	2061.33	2608.37	2490.35	2553.02	699.841	636.147	625.634	805.652	754.3
Neb	E16.5_FP	2723.45	1143.68	2475.5	910.228	2081.54	639.317	959.609	2182.98	927.55	809.726	4123.89	4527.18	1489.12	3481.1	1381.09	21091.8	28144.4	21800.8	18480.4	4068.79	2197.17	518.825	585.436	705.454	463.158
Xirp2	E16.5_FP	59.681	0	17.8353	1.19613	15.7718	4.69649	4.69188	42.8976	2.19434	5.88507	72.7003	137.335	21.2283	109.833	82.5903	647.16	753.165	621.534	598.43	95.3815	0	1.33476	0.677228	2.50968	0.703421
Gatm	E16.5_FP	880.212	827.898	963.803	884.375	1048.43	386.442	469.636	663.581	504.471	553.487	645.191	733.998	527.147	614.593	384.918	2854.91	3417.38	2261.42	2401.42	1050.22	258.203	129.424	150.025	114.674	172.509
Fabp5	E16.5_FP	3534.53	4061.14	3327.41	3510.82	3388.06	3831.23	3775.1	3847.38	3890.91	3844.66	3840.11	3354.75	3480.53	3773.24	3064.78	13278.4	7020.75	9003.11	11311.4	7531.27	1665.43	1656.99	1329.54	1111.24	1315.18
Car13	E16.5_FP	142.723	108.293	123.304	122.819	99.4123	138.575	142.394	161.577	155.39	162.851	819.59	777.525	686.89	920.599	584.308	2608.16	2276.13	3406.81	2448.17	3404.6	94.7982	107.753	71.9362	70.1998	122.538
Car3	E16.5_FP	90.4108	37.3025	81.1185	39.4481	47.98	81.1669	63.9917	159.919	82.1425	84.9987	3283.42	3945.81	2228.01	3859.94	909.964	68321.6	25663.1	32349.9	43860.1	19175.7	55.8848	17.4037	33.0313	26.2623	38.1353
Procr	E16.5_FP	102.469	69.3788	74.8011	58.3031	96.0362	126.534	110.125	114.53	110.023	94.8693	154.602	147.363	246.614	197.533	133.131	369.094	342.226	400.967	376.304	412.005	116.75	106.065	105.164	89.0004	81.7462
Casq2	E16.5_FP	456.312	139.095	146.638	34.109	153.528	46.583	31.5938	95.4136	64.6147	32.3654	605.308	995.21	361.394	336.386	185.372	5009.46	7020.86	4158.31	4742.37	633.959	315.117	57.0933	52.8981	79.9435	46.2227
Npr1	E16.5_FP	212.151	193.912	282.544	191.907	265.055	340.745	225.07	307.525	262.994	274.195	665.992	541.502	643.137	553.591	455.167	1894.71	1652.03	1598.69	1255.99	1855.44	234.723	167.772	225.841	278.011	252.923
Myoz2	E16.5_FP	73.1915	45.0773	87.1939	19.7117	53.2809	20.925	8.30973	49.6305	18.2891	23.7216	119.103	219.585	52.9037	117.093	60.1129	1340.01	1509.08	1034.37	1029.98	109.588	53.8245	10.0918	7.16852	2.30632	0.458323
Pdlim5	E16.5_FP	764.215	684.685	781.882	680.118	751.893	1102.75	861.101	795.408	941.754	889.514	2041.49	2306.84	1715.52	1646.98	1764.44	5001.56	5758.66	3194.43	4046.85	1846.29	556.247	457.209	435.208	408.558	429.579
Tmod1	E16.5_FP	206.044	172.818	220.232	104.344	106.119	144.659	147.044	204.825	125.488	97.9972	553.803	341.041	375.711	386.657	181.412	1463.14	2224.86	1085.34	1187.2	392.869	136.628	92.2874	112.042	102.168	105.279
Cavin4	E16.5_FP	70.2964	44.9518	55.8356	41.5045	52.5197	50.9954	28.4788	29.6383	35.7398	29.0491	200.344	258.374	88.4356	94.0334	78.7151	1188.8	1467.19	877.212	853.35	169.289	67.3333	63.3283	80.5685	80.8631	54.7935
Tpm2	E16.5_FP	2807.47	2366.1	2812.6	2015.28	2446.75	2432.21	2468.87	2479.66	2754.59	2405.79	3255.97	4866.17	2961.1	2698.37	3358.77	17596.2	21249.8	11443.1	13603.7	2613.08	1366.64	977.386	839.1	855.192	702.563
Prkaa2	E16.5_FP	45.7992	45.9734	45.7542	71.1505	52.5197	65.4072	70.2477	43.0234	58.2714	33.4504	147.982	136.998	90.8585	84.7462	91.8343	723.178	804.973	433.305	426.166	137.939	171.877	120.04	146.75	88.8605	201.242
Kcnq4	E16.5_FP	85.4743	78.035	71.9811	73.7071	56.2204	80.3902	66.0847	83.1961	93.1503	59.5778	191.506	224.074	139.386	198.673	163.923	456.722	598.559	489.741	450.401	519.333	143.911	181.863	195.676	135.748	120.405
Adipor2	E16.5_FP	1833.01	2078.33	2088.87	2110.15	2125.81	2143.46	2000.32	1911.02	2015.96	2254.66	2067.43	1978.28	1980.73	1923.03	1892.12	6153.48	3429.22	3673.11	4977.75	3141.32	1917.56	1991.33	2037.76	1919.38	2195.61
Ckm	E16.5_FP	6.51216	0.891135	1.33768	0	0.970644	0	0	7.57511	1.35542	3.07134	1682.34	3258.99	415.822	1031.51	442.252	16218.7	21653.4	12504.7	12305.4	2089.67	0.916942	2.4734	0	3.10041	0
Csrp3	E16.5_FP	47.1255	42.2086	41.7831	4.52194	44.6325	2.29712	1.31135	22.3245	29.5474	8.91036	213.397	330.706	78.668	163.112	75.405	1588.99	2069.18	813.84	1174.84	147.512	66.1175	0.652849	0	4.91008	2.65927
Plin1	E16.5_FP	62.3887	13.3029	29.4764	12.6149	17.9588	22.9266	19.6321	39.4347	22.6142	16.8562	203.811	89.6701	105.763	185.953	31.692	3175.91	966.885	1295.86	2207.29	1005.11	14.9294	12.3076	15.7497	17.6964	19.077
Mylpf	E16.5_FP	890.065	491.881	1184.23	81.4004	852.137	138.16	70.8856	247.875	286.364	133.24	1738.13	5377.37	1457.01	1572.4	1153.43	23719.9	21630.8	22022.3	22149.5	3630.54	316.732	71.4557	108.207	20.451	43.9578
Atp2a1	E16.5_FP	62.0703	43.3725	100.25	17.9611	65.3579	31.031	32.9427	115.194	39.2084	14.8075	514.444	614.194	226.931	260.882	179.677	3765.34	5366.87	2782.99	2702.17	440.429	218.97	51.4845	86.5871	83.2797	76.674
Dgat2	E16.5_FP	77.5231	105.572	99.516	80.4239	98.0913	68.7352	51.181	61.8077	80.5358	62.4888	118.434	104.746	77.1581	206.028	177.174	575.281	327.564	278.484	422.148	212.353	128.174	132.76	131.766	132.019	117.272
Tnni2	E16.5_FP	72.0272	37.7473	83.9173	27.6753	83.6391	34.9614	25.0786	55.0658	47.7585	16.6334	699.348	1217.04	207.437	451.854	318.343	6739.92	9344.85	5355.09	5531.5	824.786	121.881	25.7026	17.7567	18.9809	9.11231
Itgb1bp2	E16.5_FP	159.354	117.561	162.701	87.4016	196.143	77.072	62.5462	121.414	103.594	75.3305	464.952	741.806	186.335	255.609	155.149	3081.78	4095.43	2725.62	2288.57	424.145	163.092	90.4072	88.1032	82.6651	70.1171
Myom2	E16.5_FP	195.234	108.583	157.154	56.3179	302.234	38.0822	82.3265	124.392	81.6865	51.1913	715.745	1487.55	270.916	367.318	237.067	5446.32	4677.69	2282.79	4477.63	407.622	153.06	55.0014	53.4642	78.6498	79.0443
Ank1	E16.5_FP	360.383	163.687	282.488	101.728	244.924	87.4286	132.99	550.094	138.892	140.446	252.193	363.038	130.318	184.541	126.983	1541	1505.35	1350.21	1472.68	418.818	195.835	120.303	90.0156	132.59	63.8299
Pdlim3	E16.5_FP	111.113	84.8777	97.5453	27.5786	87.977	35.0748	18.4814	59.5424	45.3759	31.0773	251.605	306.506	173.652	238.537	132.906	1394.73	1716.71	1045.9	1194.17	326.224	320.742	326.947	288.081	347.674	302.935
Tmem38a	E16.5_FP	362.237	289.102	342.379	319.519	277.742	337.57	283.699	435.741	324.397	291.107	381.769	461.543	315.289	315.357	344.839	969.881	1307.79	771.047	794.504	180.725	363.061	420.396	341.96	288.615	393.413
Rrad	E16.5_FP	64.7504	50.2304	85.8134	21.6238	51.4318	42.9761	37.9383	34.3515	58.7697	34.9572	182.767	201.119	187.377	159.964	126.907	505.998	577.641	396.41	405.312	232.589	56.9633	67.4372	34.4619	37.8086	24.4912
Cdh15	E16.5_FP	339.766	162.439	435.828	132.984	404.214	243.891	135.749	526.798	377.599	247.357	243.6	194.682	115.087	183.423	137.247	845.77	1282.8	694.349	678.408	177.649	308.316	103.972	132.363	153.729	82.6884
Bmper	E16.5_FP	36.8093	39.8672	37.0789	16.0665	9.43866	132.87	189.694	137.607	88.7561	87.4572	1141.22	1425.34	1382	1063.11	849.925	2479.1	3244.81	3629.21	2771.24	4733.7	29.1811	39.1018	36.8569	26.8291	30.079
Acta1	E16.5_FP	595.694	344.976	606.309	112.528	513.643	144.316	58.3826	332.238	243.371	104.044	3337.19	5400.84	1111.12	2420.43	1205.38	36332.8	44626.6	23449.1	24900.9	4420.71	281.893	54.5278	59.4141	71.4088	51.2149
Agt	E16.5_FP	0	3.06489	3.87747	0	4.68926	5.54298	2.84788	7.6486	2.33086	0.880274	1560.64	1208.95	1121.8	1432.56	647.886	2123.42	2282.08	4265.48	2688.2	3523.73	6.20175	20.7944	3.8366	11.5519	7.96997
Idh3a	E16.5_FP	898.877	1209.37	1058.5	1192.2	1040.39	743.93	1055.19	1008.76	1127.73	1030.19	930.429	1206.23	1011.3	1051.64	914.289	5101.85	3600.04	2087.76	2862.75	1512.39	1236.68	1029.1	1076.08	1182.6	1147.6
Arpp21	E16.5_FP	146.319	187.961	282.013	98.2645	362.272	203.084	35.1047	326.191	179.558	201.46	172.551	157.616	125.471	134.913	111.846	543.445	1049.72	540.38	663.591	165.66	363.245	186.364	66.4288	167.454	47.6599
Pygm	E16.5_FP	116.153	71.5022	122.059	64.0205	101.558	79.9351	51.8032	84.7901	61.2565	45.2785	417.977	506.19	171.836	286.31	301.786	2378.47	3746.56	1952.59	1954.82	387.458	112.559	63.6687	97.7877	87.4809	71.3546
Ablim3	E16.5_FP	146.188	94.5202	185.283	61.1429	165.91	74.3887	44.0314	158.48	73.5783	63.1171	408.249	443.694	258.972	348.593	219.74	1658.25	2007.78	1523.09	1559.51	1093.65	123.403	51.8927	39.9815	52.7421	39.1141
S100b	E16.5_FP	3.19529	17.3677	10.0814	16.9406	8.44067	54.3212	38.921	46.8477	29.5242	36.0912	243.6	293.224	294.382	279.778	215.962	520.733	485.76	661.222	630.604	889.292	38.9824	44.4243	35.4885	25.7696	38.8536
Agl	E16.5_FP	1191.61	1474.74	1300.12	1489.48	1471.15	1175.34	1009.01	1089.87	1022.17	1114.2	1405.15	2359.73	1321.83	1238.08	1471.55	6168.18	6529.34	3516.22	3015.22	1124.55	1645.11	1405.84	1632.71	1713.19	1636.77
B3galt2	E16.5_FP	71.3615	83.7737	49.6317	38.9634	56.2711	49.8868	36.0731	66.9253	49.725	37.8518	54.6393	93.7357	59.3609	45.2754	33.3025	546.601	311.283	272.969	342.764	141.074	31.0088	25.5204	27.8153	24.8809	33.8724
Scn7a	E16.5_FP	122.486	111.358	155.874	119.431	183.819	116.403	114.864	89.8711	153.06	139.964	464.434	457.863	422.795	397.03	236.145	774.914	877.341	1212.46	861.487	1421.19	22.1491	23.63	13.4281	5.33163	27.8949
Cebpa	E16.5_FP	91.9752	126.171	91.8478	109.231	100.037	135.788	94.1739	82.265	159.219	174.654	554.699	635.557	518.021	599.833	512.203	3133.73	1834.24	1987.15	2268.68	1957.64	103.494	73.1808	86.7559	107.387	119.327
Pim3	E16.5_FP	279.308	455.459	282.371	304.601	251.407	413.756	421.141	293.295	481.675	390.898	367.129	251.783	601.702	463.13	316.029	893.25	650.263	965.765	920.57	893.704	387.857	395.402	286.211	282.086	256.519
Meox2	E16.5_FP	337.636	310.576	358.279	278.673	417.344	478.914	464.204	440.751	391.584	353.87	1027.9	1041.91	1066.07	965.874	1041.46	2686.89	2280.1	2218.21	2325.1	2149.56	118.719	72.7803	62.3447	47.0961	70.7335
Arhgap36	E16.5_FP	61.7941	25.4981	8.40129	13.2546	12.418	10.6755	85.0695	27.0449	21.9779	16.4238	307.819	827.414	46.6637	386.242	182.627	3399.16	3509.96	1880.19	1752.36	232.708	414.879	227.74	173.554	199.16	106.729
Klhl13	E16.5_FP	1688.35	1527.26	1576.44	1315.81	1607.71	2755.71	2340.61	2980.2	2369.26	2539.38	5951.16	5846.37	5907.35	6296.41	4346.95	9496.47	10572.7	13085.7	10575.3	14396.6	2110.43	1884.63	1555.13	1688.73	1761.78
Myom3	E16.5_FP	124.747	48.528	110.606	20.0477	76.4123	18.039	24.9518	96.5324	47.6184	13.0216	344.439	385.838	84.2265	116.776	57.402	842.444	1387.04	805.437	769.862	163.146	51.1125	38.5641	44.2162	33.304	13.2634
Traf3ip3	E16.5_FP	140.711	198.203	188.975	119.244	185.054	176.393	176.817	209.839	159.158	108.926	206.829	277.358	177.975	291.061	149.3	610.597	746.402	465.275	480.034	177.958	38.4349	17.4291	21.0979	9.65075	21.3441
Tgm2	E16.5_FP	127.208	112.321	133.923	122.412	104.256	794.678	634.152	528.314	491.094	927.916	474.128	494.618	489.693	523.988	755.443	1672.5	1537.63	1403.85	1456.73	907.4	246.499	419.094	218.534	296.345	255.293
Rbm24	E16.5_FP	312.637	164.91	299.845	234.876	260.263	255.329	235.978	439.426	258.503	164.146	220.07	346.019	98.785	212.731	111.422	851.581	1324.99	617.884	903.744	257.289	288.074	57.4792	86.8285	62.6345	46.8145
Hrc	E16.5_FP	51.9941	13.8534	38.5579	9.18864	44.0868	7.01524	9.43983	47.7766	18.964	8.75351	154.502	152.093	105.88	78.71	58.7079	684.259	967.037	622.195	720.038	199.972	45.6523	22.3168	13.8732	29.7153	7.2049
C1s1	E16.5_FP	98.3364	27.2501	64.4192	7.55926	35.5836	195.378	32.4756	132.261	95.1595	25.7501	641.618	698.2	536.957	345.348	684.371	1944.31	1277.94	1488.5	1562.64	1741.37	423.666	579.189	643.938	440.041	696.052
Fsd2	E16.5_FP	11.7161	3.06489	10.8569	0.84703	13.1299	15.5203	2.84788	6.69253	6.21562	8.80274	71.7141	94.9374	35.132	56.8844	40.3667	651.198	716.743	384.277	444.474	79.4197	8.85965	5.67119	0.959149	0.888605	2.98874
Alpk3	E16.5_FP	103.611	68.263	144.02	48.2735	95.8407	34.8583	28.9164	101.461	74.054	38.0586	208.046	263.328	65.4711	177.953	118.995	778.018	1159.19	765.608	894.278	140.267	87.056	20.4328	21.6769	23.5752	12.726
Synpo2l	E16.5_FP	123.007	56.5866	168.06	37.3588	166.42	48.3479	32.1322	162.81	75.5365	45.873	165.733	209.943	108.542	153.863	70.6898	1076.1	1513.89	708.986	796.46	171.783	197.043	46.9672	53.1258	51.3273	48.0904
Txlnb	E16.5_FP	128.823	117.439	118.291	61.9341	81.2242	104.612	78.3521	186.288	94.4775	71.6469	157.923	207.631	71.0002	119.716	57.8065	549.341	756.492	572.359	485.4	157.57	149.605	149.661	121.52	117.829	122.833
Btnl9	E16.5_FP	85.5032	64.5334	107.949	41.3435	48.2422	199.533	134.747	92.3343	94.4477	90.1079	560.718	392.883	645.851	303.815	337.137	1580.64	1037.03	1547.21	1662.53	1573.95	41.3702	39.5981	71.2575	38.446	34.164
Slc26a7	E16.5_FP	12.417	24.2633	44.5144	31.7152	25.3524	332.803	218.37	372.631	184.175	190.879	1205.46	1137.61	1435.26	865.888	1093.07	1327.79	2405.17	3706.65	2910.33	6818.52	1041.7	2198.49	1170.62	1132.92	1609.45
Apobec2	E16.5_FP	65.919	41.8126	69.6709	15.2195	61.7885	9.95969	11.3713	71.5786	23.2673	17.5743	220.443	470.247	73.7673	155.286	64.4723	2240.48	2814.7	1600.52	1644.79	225.319	45.9885	10.3788	7.6596	17.7406	4.9724
Chrnb1	E16.5_FP	187.705	83.1368	140.723	62.7629	148.677	105.736	86.055	212.963	107.699	119.749	115.863	111.096	103.506	118.891	91.5234	346.095	521.65	273.196	221.913	80.6651	139.428	61.7537	85.3135	72.1744	117.372
Smpx	E16.5_FP	71.3362	54.3409	39.8038	60.1566	69.0577	76.8033	48.7946	75.6253	68.5289	50.1373	178.747	432.634	260.328	289.366	163.888	1465.88	2205.07	941.981	1113.19	272.296	10.9486	2.36663	5.92652	21.5492	26.8673
Sln	E16.5_FP	29.8227	15.3245	32.5708	1.69406	19.6949	7.76017	9.49293	16.2533	12.4312	1.76055	130.907	301.637	59.3609	98.6771	68.6234	1184.3	1381.94	962.018	1032.36	130.625	38.0965	7.56159	4.79575	6.22024	2.98874
Mybph	E16.5_FP	137.756	80.8122	171.92	23.0885	176.176	26.7033	27.3493	110.387	82.8122	28.9839	212.938	237.777	82.5302	160.195	110.69	915.208	1265.1	641.328	677.922	171.534	185.349	30.8652	37.9791	36.1526	27.4409
Jph1	E16.5_FP	173.251	110.048	145.501	119.584	192.338	98.2287	141.94	147.804	92.4655	100.174	243.204	144.064	94.7135	239.729	189.459	500.229	539.444	428.389	499.525	178.836	116.214	111.826	118.315	117.332	130.68
Ppp1r3a	E16.5_FP	15.9765	5.10815	13.9589	5.08218	5.62711	7.76017	9.49293	19.1215	6.99257	7.04219	177.578	243.953	53.3037	73.1371	33.3025	1065.09	1405.73	887.812	780.118	134.805	24.807	8.50679	4.79575	2.66582	1.99249
Trim72	E16.5_FP	44.9797	31.1039	67.0225	15.8056	58.0275	13.0651	16.5027	25.3522	23.6546	18.4879	186.968	284.437	80.9044	128.835	81.2711	870.401	1170.07	757.405	681.253	137.524	36.5447	8.35458	8.25334	10.4725	7.79043
Ecm2	E16.5_FP	102.88	70.2096	85.7191	49.5024	93.2056	89.1273	81.1531	101.86	60.7341	71.8778	152.932	205.148	217.101	193.675	162.718	418.024	357.989	375.891	366.655	422.676	136.56	142.496	166.784	93.7662	134.05
Col6a6	E16.5_FP	69.5892	54.7609	34.3435	36.4705	64.28	737.166	674.34	618.813	496.257	408.212	1356.47	920.491	842.598	1187.53	1242.17	5259.14	7945.64	4546.26	3866.55	3179.11	498.92	397.019	357.393	573.638	627.32
Lmod3	E16.5_FP	50.0596	38.822	60.4886	16.0936	53.4576	15.5203	5.69576	42.0673	17.093	10.5633	77.4057	141.805	32.7091	41.7926	55.5042	525.232	601.747	376.326	400.739	76.2847	51.386	11.3424	19.183	12.4405	9.96246
Klhl31	E16.5_FP	128.877	77.6439	176.813	49.9747	150.994	65.4072	43.6675	180.698	98.673	80.9852	349.464	410.995	136.894	186.906	122.109	2294.38	3236.74	1847.18	1729.08	344.849	239.21	37.808	70.977	78.1973	26.8986
Mylk4	E16.5_FP	20.7287	43.2517	52.9596	14.8144	45.6181	19.4415	5.88169	89.8686	25.4272	16.6109	192.593	152.782	82.7073	82.262	41.5748	704.952	984.154	533.581	570.215	159.891	147.529	51.9971	45.2016	33.918	40.6804
Cavin2	E16.5_FP	1609.36	1573.31	1642.5	1423.01	1841	3795.83	3679.46	3813.78	2930.66	2958.6	4623.85	4215.7	4410.88	4498.51	3047.69	11900.4	9211.59	11381.2	11045.7	11047.7	956.842	815.707	706.893	646.905	815.925
Trarg1	E16.5_FP	13.8463	34.7354	17.0609	11.8584	27.1977	6.65158	8.54364	10.5168	14.7621	9.68302	159.365	145.41	119.933	104.482	99.9076	411.638	287.49	355.125	420.064	337.534	9.74561	2.8356	5.7549	1.77721	4.98123
Cmya5	E16.5_FP	44.7341	33.7138	27.9178	20.3287	22.5084	27.7149	35.1238	35.3748	22.5316	19.366	520.212	534.774	184.14	263.526	129.173	2532.81	3489.54	2142.68	1941.65	482.788	33.6667	11.3424	17.2647	24.8809	37.8573
Inka2	E16.5_FP	126.961	53.8271	187.294	80.7627	112.226	109.976	113.806	188.81	102.686	109.203	144.347	171.706	135.229	114.037	124.496	363.578	436.443	439.071	355.138	195.97	95.7319	29.5424	51.3916	65.8631	43.5931
Fitm2	E16.5_FP	323.79	536.356	468.399	470.101	496.124	466.719	483.19	374.782	507.35	486.792	647.704	614.089	554.843	588.58	548.987	1612.81	1162.85	1272.09	1281.55	1297.89	522.719	588.859	521.777	518.945	563.875
Nrap	E16.5_FP	74.2737	74.4617	78.8882	46.3361	62.6343	40.4079	64.7874	71.0298	52.6627	43.4033	213.488	281.657	142.128	188.415	95.5238	1122.49	1570.05	870.7	1001.7	235.685	30.192	5.88868	9.83115	15.5973	8.33625
Scn3b	E16.5_FP	143.477	59.6291	237.741	100.223	267.882	85.9563	89.1211	171.996	110.036	191.978	116.481	146.9	123.142	219.745	90.8713	388.257	804.42	359.527	375.061	144.981	187.9	156.709	182.788	111.08	272.33
Fzd4	E16.5_FP	573.023	666.103	540.52	583.603	760.598	776.017	860.06	701.759	665.071	723.586	2128.66	2279.7	2012.21	1815.66	1996.13	4649.48	5092.54	4093.21	4029.76	4546.78	1239.46	654.078	872.826	869.056	978.314
Fbxl22	E16.5_FP	46.8643	59.2546	69.019	56.751	67.5253	92.0135	82.5885	82.2225	73.8105	58.9784	87.6506	124.981	66.6296	47.5972	90.8251	350.904	408.435	259.718	270.55	79.4197	87.7105	53.8763	87.2826	74.6428	63.7597
Six1	E16.5_FP	65.0737	15.8013	29.7812	30.8386	116.877	22.1474	41.0304	113.561	92.703	25.5281	27.1427	175.599	152.021	75.4678	50.633	251.62	416.433	169.083	269.099	212.46	160.867	85.8683	91.2871	90.8879	92.5802
Ttn	E16.5_FP	5998.44	2931.88	5695.2	2666.4	7148.15	1479.43	1570.36	7068.5	5493.6	2221.02	59076.4	61841.2	15691.5	50460.7	15274.6	183137	285849	204947	207779	38461	8342.51	1493.47	1968.34	2227.79	1352.46
Actn2	E16.5_FP	303.982	173.483	378.586	80.6102	324.188	73.2001	103.276	200.081	126.804	81.2209	894.267	1302.99	280	568.842	356.856	5897.71	10296.3	4525.23	4966.72	821.343	373.634	52.7727	52.7994	124.446	39.0397
Iigp1	E16.5_FP	58.7174	18.6839	30.3758	24.065	42.976	46.2459	32.7154	68.9058	64.6052	35.4021	108.592	100.012	67.0302	122.413	123.736	489.758	391.205	557.308	432.145	358.985	56.0047	24.3804	20.1209	57.3305	12.3716
Irs4	E16.5_FP	14.9114	22.4759	15.5099	18.6347	17.8192	25.4977	74.0449	33.4626	13.9851	18.4858	86.5123	66.0957	66.6296	149.757	36.33	1702.79	897.168	699.649	1085.25	370.974	9.74561	6.61639	4.79575	7.99745	10.9587
Smyd1	E16.5_FP	155.204	123.241	196.466	79.298	170.726	67.2616	35.6937	181.533	83.0559	58.658	225.693	255.091	124.815	166.114	126.684	1228.72	1433.51	858.863	918.161	180.07	185.729	25.1373	56.2165	42.3667	45.1008
Myh8	E16.5_FP	490.956	271.542	371.344	85.2133	361.479	207.724	139.367	589.369	312.446	189.22	6425.16	8609.89	2118.34	3178.08	1486.2	42627.6	61865.3	39645.3	38396.9	6008.53	693.513	147.552	177.784	220.813	189.331
S100a8	E16.5_FP	6.40105	6.13982	0	3.39367	2.77289	8.79873	5.70508	8.57261	1.55645	2.64515	197.131	123.982	171.094	134.798	118.266	1983.56	144.974	133.954	360.188	136.674	52.3575	282.819	90.3077	72.0949	256.454
S100a9	E16.5_FP	4.25119	4.07769	1.54764	0.867696	2.80748	3.3186	1.94491	14.3101	4.65164	3.51349	252.161	107.923	135.389	75.2959	123.859	2787.7	123.651	244.613	556.169	199.163	55.6952	449.886	152.175	112.609	326.562
Lmcd1	E16.5_FP	138.463	133.834	145.793	102.491	120.045	135.249	130.053	227.546	160.052	156.689	144.567	203.094	99.3386	184.584	97.8893	881.76	972.51	438.606	607.211	176.604	308.316	282.614	215.809	271.025	257.031
Skap2	E16.5_FP	465.147	391.262	321.453	342.525	282.148	356.971	355.369	445.524	587.495	344.611	627.024	439.135	523.476	499.724	417.425	1202.7	955.861	1265.76	1076.12	1066.02	289.881	182.415	186.559	200.576	258.093
Mamld1	E16.5_FP	71.0624	34.3953	30.8293	42.9866	67.8681	60.0792	34.7941	61.1001	44.5415	41.3646	107.05	81.3175	91.7819	104.855	94.2201	404.64	343.939	231.359	284.557	169.153	90.0219	58.14	76.6207	59.2699	57.0792
Eno3	E16.5_FP	310.382	143.874	298.786	187.276	205.588	265.027	242.123	321.355	200.947	182.077	782.327	1490.78	369.002	510.522	380.566	5159.04	6816.74	4010.47	4403.99	619.58	148.725	239.054	240.399	234.939	346.708
Plaat3	E16.5_FP	78.2295	168.417	80.6323	126.129	94.0417	80.1317	70.4301	56.5009	80.2699	63.2232	150.053	252.018	125.668	128.127	100.676	999.337	600.281	638.029	686.519	444.298	187.321	282.433	275.746	215.557	183.37
Trim55	E16.5_FP	64.7455	31.1697	136.501	12.6864	97.5053	19.8853	13.2223	38.1856	53.7948	50.5423	71.9854	163.968	35.3381	101.349	97.9003	439.365	773.945	343.716	323.572	97.6661	107.542	45.6413	100.58	86.8903	89.2373
Myl4	E16.5_FP	475.556	449.886	580.547	148.139	496.641	139.439	89.9089	316.219	228.19	159.875	535.763	1207.69	389.96	464.668	396.365	4142.28	5708.16	3568.11	3185.31	509.785	442.015	67.9506	72.621	83.9426	32.5551
Akap6	E16.5_FP	182.578	117.598	205.641	98.1355	206.082	199.713	186.491	162.782	184.734	132.26	570.363	543.125	299.227	404.077	274.173	1441.79	1947.52	963.234	973.995	303.227	554.276	475.27	381.489	431.274	512.442
Tnnt3	E16.5_FP	51.5699	119.25	57.1276	51.771	50.3841	71.3383	53.2324	48.8094	52.9835	37.1403	787.15	1529.96	281.587	600.91	293.596	7653.16	10181.3	6172.98	6667.59	1033.54	56.7329	24.8049	27.8126	39.5834	24.4255
Myl1	E16.5_FP	198.955	122.267	183.223	44.2625	230.164	150.775	42.0533	166.984	102.368	93.7013	1135.73	2232.8	552.595	1054.72	486.093	15449.1	18035.9	10190.7	11130.2	1611.33	293.249	77.7426	77.496	81.4857	49.2017
Fabp4	E16.5_FP	172.821	245.886	132.978	141.816	114.66	72.2561	87.4598	103.412	105.775	46.8458	2921.99	2313.84	2870.31	2936.64	1080.53	23508.2	10864	15776.4	21935.4	15445.1	53.928	53.4818	60.2238	42.7949	48.8906
Cav3	E16.5_FP	47.9294	24.5191	50.4072	18.6347	57.209	27.7149	22.783	43.9795	24.0855	14.9647	154.811	257.172	82.3784	106.803	63.5776	1095.45	1267.93	699.649	673.323	133.76	28.3509	6.61639	4.79575	2.66582	3.98498
Slc24a3	E16.5_FP	110.039	161.187	76.9188	105.644	90.7369	104.712	77.844	104.033	87.6503	89.6377	257.068	156.189	158.031	176.755	145.897	455.932	569.011	524.733	448.085	540.306	195.897	186.441	275.506	253.778	243.641
Map7d3	E16.5_FP	116.488	93.9355	85.565	118.275	95.3094	54.7212	90.0407	130.086	81.9659	96.2739	144.327	120.964	134.839	104.494	143.96	271.048	287.525	314.213	245.119	260.944	112.331	141.797	131.822	127.287	140.335
Actc1	E16.5_FP	3001.29	1794.04	4232.97	1333.88	3398.8	1307.41	1031.72	2711.89	1992.77	1445.85	2299.42	4224.23	1534.89	2075.62	1836.49	21576.3	31328.5	14906.6	15630.1	2804.13	2288.26	553.587	673.536	783.317	530.892
Myoz1	E16.5_FP	23.6063	8.93951	10.1079	1.99876	7.09989	12.0549	1.95225	13.2532	4.32343	5.41767	45.7116	134.054	9.43367	54.4012	23.6525	523.59	634.551	456.153	497.073	77.0027	1.25438	7.84283	11.2588	3.37208	0
Ampd1	E16.5_FP	14.4804	5.32629	20.4749	1.104	11.6126	21.7913	2.81174	33.3856	7.43619	2.3918	82.169	191.109	16.2125	69.3201	55.5061	1079.14	1132.37	662.124	588.306	148.896	2.2681	1.93579	0	6.37005	7.29767
Adamtsl3	E16.5_FP	36.1352	75.3654	37.657	25.5439	53.9227	63.5343	155.578	134.574	32.217	30.4178	138.838	163.454	197.455	133.782	95.8951	641.676	688.869	754.249	491.651	365.529	15.5855	19.5968	44.0923	13.3988	20.6551
C1qtnf9	E16.5_FP	219.41	177.764	182.241	125.36	157.559	191.787	123.408	97.5197	123.535	87.1472	355.156	249.962	354.954	276.296	230.09	635.452	475.846	789.756	746.554	868.392	1.77193	9.45199	9.59149	1.77721	8.96621
Myo18b	E16.5_FP	143.307	25.9399	97.6346	55.42	130.549	88.5955	52.9757	102.349	128.977	53.3285	274.154	281.627	81.1382	203.742	111.456	1061.84	1668.45	962.61	1048.75	203.275	138.472	29.5012	45.4317	27.1815	32.513
Klhl40	E16.5_FP	41.6968	23.2531	50.1829	8.83621	44.4712	16.8216	19.2154	23.5744	25.7892	13.3571	75.5678	186.059	34.4668	66.0577	34.0245	476.347	856.901	333.018	347.911	65.4084	63.1552	16.0896	7.27698	9.26993	15.1169
Ankef1	E16.5_FP	10.3033	22.1668	31.776	22.1446	54.6851	51.6887	10.014	63.9938	53.1418	21.1494	78.5939	48.6681	65.9354	65.0235	39.2497	471.791	243.596	343.537	411.324	212.234	39.391	61.7377	11.9211	52.6473	17.0184
Klhl41	E16.5_FP	508.052	386.176	569.989	260.038	570.214	283.801	248.715	584.162	403.238	314.258	846.91	1109.21	553.631	886.933	466.235	3658.63	4323.26	2947.01	2525.47	831.817	566.131	206.053	356.804	436.305	300.866
Cpt1b	E16.5_FP	48.8996	22.6857	31.1122	35.7242	39.9225	21.9207	47.5278	49.6761	22.0843	23.9332	162.366	89.7599	53.0661	90.1694	108.841	547.028	444.951	263.822	667.198	67.1551	37.7743	52.1324	47.3704	86.1082	54.0691
Xirp1	E16.5_FP	14.0534	4.58224	23.3003	6.47039	13.3338	4.61917	3.29617	102.76	44.9363	4.35397	428.013	125.481	32.8101	56.4331	20.3236	820.493	1496.2	977.835	1131.38	72.4199	22.7644	1.41314	4.30199	1.99279	2.97892
Tceal7	E16.5_FP	251.424	121.861	202.125	28.1058	229.662	21.0009	19.9157	104.668	80.1281	39.8875	301.887	887.841	180.49	207.381	173.39	5843.11	6749.22	4758.52	5831.46	662.395	127.021	7.66884	9.19694	24.8774	15.5143
Tmem182	E16.5_FP	23.4321	5.10815	17.0609	5.08218	23.4463	2.21719	0	8.60468	11.6543	3.5211	93.3422	173.05	48.4579	62.689	62.5684	546.601	695.925	527.387	443.457	114.95	19.4912	0	0.959149	0.888605	0.996246
1110002E22Rik	E16.5_FP	26.1273	17.9007	42.8023	15.5835	53.4066	19.4245	22.4549	77.8973	35.3952	13.8815	531.533	658.661	102.949	176.968	84.8754	1683.44	2329.97	1383.77	1548.95	326.435	54.3327	9.10884	23.5283	19.4624	68.7961
Tnnc1	E16.5_FP	337.962	212.677	365.642	57.0794	275.072	96.6849	47.2162	233.869	118.755	70.6824	207.63	328.651	144.11	122.009	109.209	929.858	1398.19	710.6	629.033	119.948	290.559	47.955	49.4422	77.5175	31.0606
Timp1	E16.5_MM	267.077	374.583	247.423	289.255	208.305	377.496	304.161	312.232	317.63	299.749	731.906	678.551	987.944	715.026	701.581	320.85	243.123	350.372	304.075	388.422	261.922	355.979	285.414	262.25	281.622
Col1a1	E16.5_MM	46867.2	44253.6	44896.7	62104.9	36923.6	43860.9	33086.4	31432.1	35135.8	25912.7	111453	98494.1	110058	110737	143709	45579.3	74127.7	45658.8	33581.1	46751	8863.54	9880.05	8267.96	9777.22	12019.1
Ltbp2	E16.5_MM	19.6999	0.760257	33.5137	9.18123	9.40178	35.6927	36.2895	65.1875	34.4775	35.0035	973.341	843.479	1584.97	1439.67	797.514	199.238	223.546	236.22	154.484	232.558	4.3858	15.9372	4.25091	58.6699	9.79723
Clec11a	E16.5_MM	193.848	259.494	100.814	133.831	94.723	222.828	164.228	154.884	146.844	112.675	265.228	400.179	379.183	332.019	470.272	112.469	101.117	104.682	99.6762	136.894	48.7281	62.3831	48.9166	41.7644	50.8085
Tenm1	E16.5_MM	254.778	244.855	140.06	108.823	72.1764	241.32	294.457	266.919	216.515	267.4	860.786	987.571	778.169	686.359	1055.17	60.9765	165.507	84.1075	124.633	142.234	54.462	75.8846	43.7706	76.2537	44.0463
Esr1	E16.5_MM	248.357	133.653	284.125	116.569	262.154	647.839	711.048	585.75	408.434	383.24	2211.75	2582.29	1955.58	1968.43	2970.77	187.199	173.601	421.669	308.086	319.524	95.212	107.164	115.699	175.74	91.3384
Myocd	E16.5_MM	236.988	207.323	77.9462	226.641	100.481	60.3173	25.7588	37.5086	24.1929	15.3214	1001.2	756.321	856.785	578.568	972.797	92.5592	152.571	55.8099	72.2639	181.252	22.4663	9.43869	25.2895	10.3525	7.96319
Hoxb9	E16.5_MM	549.238	589.838	426.864	543.227	479.155	546.487	481.478	411.743	451.784	504.465	1926.6	2098.09	2156.45	1505.71	2644.31	110.944	58.7749	62.4445	41.7506	27.5386	0.926654	0	2.0064	0	0
Cacna2d3	E16.5_MM	240.904	162.254	223.165	291.17	251.431	496.996	499.63	464.651	571.366	630.026	1368.29	1262.33	1326.43	881.476	1312.34	25.6539	20.6918	18.1002	42.8607	34.4487	56.09	62.9276	36.5565	23.7756	41.1697
Dct	E16.5_MM	58.6639	51.7577	44.1843	41.0679	43.4826	58.4724	70.4098	68.0935	65.2648	41.2081	524.331	384.871	417.617	250.17	286.94	52.6133	81.3773	185.467	106.988	255.747	30.4644	31.1645	28.9262	54.5381	29.3408
Il1rap	E16.5_MM	543.866	478.82	491.301	494.265	521.556	642.173	599.412	596.614	605.581	645.539	1697.22	1795.45	1856.51	1568.18	2225.83	407.333	416.773	506.062	423.378	436.296	622.286	530.931	501.376	449.214	461.477
Pde10a	E16.5_MM	378.291	473.024	275.438	159.425	201.326	690.008	553.036	461.636	358.053	429.522	1565.39	1160.74	1191.34	573.617	1119.05	324.268	332.456	285.212	362.529	405.625	109.303	124.876	160.756	190.837	172.472
Pla2g7	E16.5_MM	61.9953	102.895	75.6582	49.2648	41.5403	216	175.53	82.9398	97.0601	80.0784	831.75	755.553	599.85	643.004	1191.05	343.797	327.941	307.455	328.051	457.952	121.769	137.636	117.57	135.515	156.866
Lama3	E16.5_MM	184.241	263.035	148.509	299.088	141.257	45.9647	87.019	68.8691	44.7052	33.5186	829.875	516.782	548.275	337.025	697.766	307.579	258.661	220.322	222.935	233.203	34.8327	49.003	22.7248	40.6029	30.3476
Lox	E16.5_MM	6943.59	8177.07	6471.58	8835.48	6067.19	7935	6886.47	7074.33	6339.64	6149.95	14444.7	15788.8	17828.8	15345.9	17196	6359.97	9891.5	6435.24	5421.57	8001.34	2209.64	2308.64	2004.88	1980.04	2791.88
Setbp1	E16.5_MM	1894.81	1890.02	1633.19	1960.03	1475.24	2260.43	2211.85	2373.94	1851.48	1802.8	6071.8	5672.21	5223.76	4193.19	6015.65	1022.35	1383.92	1134.28	1081.18	1405.52	2115.68	1146.53	1578.76	1733.67	1741.44
Loxl4	E16.5_MM	138.035	139.546	123.091	187.507	186.281	393.149	334.076	157.821	325.089	296.145	1135.66	1189.71	1313.51	1064.25	1932.18	133.731	90.7322	110.654	73.086	115.639	26.2785	15.722	27.7565	7.68595	25.4552
Pcsk2	E16.5_MM	173.045	254.773	107.202	164.957	126.803	120.61	75.4263	160.294	91.3565	77.2432	1713.02	1965.8	1560.85	1046.47	2353.08	143.789	227.217	288.599	227.204	491.492	113.944	157.648	117.434	144.523	166.908
Glrb	E16.5_MM	331.428	335.788	317.442	228.649	273.13	236.588	261.425	290.417	318.832	255.478	572.748	731.816	657.945	541.455	673.42	168.477	229.256	198.67	226.304	241.005	241.834	180.309	213.786	183.497	213.749
Ptgfr	E16.5_MM	53.7762	56.6577	189.424	72.7793	36.1239	1384.1	332.9	298.404	347.023	363.326	772.486	1021.96	1148.93	1220.26	2165.68	185.065	305.454	260.446	296.707	427.425	154.185	136.93	115.107	144.671	111.178
Ecm1	E16.5_MM	156.675	190.56	144.089	109.02	75.7904	136.125	147.193	123.593	142.615	135.157	902.492	1060.18	1109.61	651.818	1075.33	302.211	238.53	240.278	225.629	492.69	96.9701	81.6603	80.0523	71.9503	92.7213
Col1a2	E16.5_MM	106456	125390	131211	140182	117160	116601	116485	77865.4	102547	86244.1	239600	250044	280161	282151	278111	119343	144170	116208	93695.7	107268	54616.2	63401.2	55062	62543.4	59268.3
Tspan11	E16.5_MM	438.977	413.543	664.977	686.801	489.927	909.27	673.332	472.325	613.276	611.42	1071.31	1539.66	1419.69	1051.98	2573.46	483.199	384.868	390.095	366.797	238.419	246.149	360.866	486.262	288.575	274.039
Dkk3	E16.5_MM	149.114	144.05	122.528	99.9495	110.667	195.113	202.199	217.985	205.115	219.188	647.704	582.844	660.239	561.879	761.922	338.533	297.404	204.064	254.276	258.114	178.965	184.314	117.975	111.076	137.482
Tnmd	E16.5_MM	232.191	438.28	183.792	218.534	182.881	17.7375	22.783	12.429	29.5242	34.3307	950.497	1275.05	1104.84	770.842	1304.85	452.127	508.561	161.661	295.977	123.31	3.54386	9.45199	1.9183	0	1.99249
Pdgfrl	E16.5_MM	34.951	23.6551	26.0776	46.036	27.1752	50.7347	48.3079	47.5729	59.9296	48.0418	236.398	279.193	423.859	306.461	311.436	152.482	214.537	103.021	91.8282	84.486	68.4784	88.221	82.7403	75.8093	68.3408
Trpc6	E16.5_MM	45.6919	42.6374	38.5284	30.305	42.9455	89.2864	68.8367	47.3609	51.8012	70.6701	292.937	345.904	401.181	341.597	343.842	53.5247	62.7025	102.723	64.0248	85.3743	57.6295	16.8155	41.6512	23.8817	28.4412
Tmem218	E16.5_MM	322.725	349.398	324.157	332.036	316.056	494.434	435.726	436.926	482.487	427.813	794.547	975.812	894.048	781.29	1234.21	259.804	225.036	303.446	341.747	311.409	248.956	293.957	247.46	198.159	247.069
Col12a1	E16.5_MM	12765.6	12476.7	10277.5	13526.1	9544.68	14417	15682.4	13570.7	13136.9	12284.3	36713.8	33031.4	37270.8	30990.6	36668.4	18022.7	21544.6	12286.3	14166.6	12166.2	8458	9455.05	10255.6	9903.68	10650
Rxfp1	E16.5_MM	133.227	81.5455	165.371	96.4752	150.387	34.7659	52.6014	43.6296	33.5966	55.3778	960.778	880.607	965.137	492.95	566.271	25.7487	33.4866	69.9992	39.5036	68.8394	8.55551	6.30685	3.91768	10.3185	9.0992
Tgfbi	E16.5_MM	1112.19	2138.52	841.728	861.103	622.714	504.192	690.075	701.467	599.278	450.713	3175.42	3865.87	3804.02	2946.57	4570.59	827.022	914.216	695.742	751.697	721.669	1421.39	579.138	1060.51	877.432	939.61
Lum	E16.5_MM	7577.1	10381.8	5471.89	7428.45	5602.73	19366.1	17101.5	16470.3	17635.3	18747.2	33702.2	37701	44760.5	44591.6	40181	15076.5	17087.8	17941.8	15904.4	21052.5	8234.16	9780.92	6969.18	7305.22	9416.52
Inhbb	E16.5_MM	227.931	139.963	248.158	158.395	151.932	164.072	183.214	173.05	128.197	115.316	1098.48	1305.09	1000.66	702.348	1557.15	30.3667	47.5846	23.8517	50.8552	42.8448	85.9386	84.1227	98.7924	141.288	105.602
Enpp1	E16.5_MM	177.104	106.781	96.4007	110.681	112.785	172.996	110.141	201.438	167.323	125.616	581.364	534.055	536.56	812.886	466.507	187.757	303.348	169.995	253.194	204.622	88.6606	82.9844	73.0156	101.312	103.051
Trps1	E16.5_MM	1370.07	2690.09	1059.04	1946.64	1478.51	1043	963.068	581.239	769.052	537.085	10869.1	10411.9	7469.46	5587.05	11866.4	1393.12	1100.24	1069.58	1246.42	946.397	765.355	353.402	609.073	504.036	545.332
Mfap4	E16.5_MM	2547.49	2611	2761.19	1908.91	1886.49	5102.59	4184.86	3093.24	3518.72	4236.5	9067.28	7004.57	9009.05	8398.66	8594.21	1849.49	1429.72	1263.97	2323.53	1461.17	484.434	738.678	450.94	332.381	368.078
Sorcs1	E16.5_MM	133.387	60.9835	169.234	90.5993	122.122	478.754	280.989	336.424	260.564	255.84	1103.58	1073.66	1122.25	1211.39	1234.01	191.207	222.308	153.666	189.927	219.404	176.443	118.493	182.884	187.888	204.101
Adamtsl5	E16.5_MM	50.0341	37.1582	30.2507	47.1296	24.7978	332.689	237.108	182.667	250.002	177.685	721.575	645.172	848.691	640.082	682.841	272.479	213.816	190.675	220.931	219.636	36.6462	34.2681	18.633	27.8265	24.1484
Krt14	E16.5_MM	13.7896	6.23364	15.7774	18.7994	2.87908	54.9115	90.4217	20.3355	18.6811	9.76864	960.05	157.81	97.4672	521.757	801.662	342.963	6.41739	14.7049	15.99	8.69745	2.45795	3.49638	5.86918	5.45579	0
Penk	E16.5_MM	669.366	298.296	397.142	481.513	375.294	581.458	546.789	708.998	680.257	686.393	1190.3	922.055	2041.5	1867.04	1077.82	429.949	559.833	487.959	436.917	470.534	664.68	600.927	556.186	799.279	613.114
Ar	E16.5_MM	1299.42	1053.3	1343.93	1731.33	1337.38	4927.71	3959.5	2285.02	2372.81	2516.7	10921	12656.7	8682.44	6837.74	16739.1	103.472	78.3163	66.2547	77.2999	63.7448	72.6491	150.287	69.0587	63.9796	109.587
Pirt	E16.5_MM	19.1718	14.3028	18.6119	22.0228	25.322	362.511	223.084	228.502	196.569	262.322	531.595	430.223	749.886	567.683	419.814	2.24939	2.97404	10.6007	4.06841	0	145.298	169.191	182.238	167.058	196.26
Col6a3	E16.5_MM	21301.9	23097.4	19021.9	28480.9	21412.7	20799.2	27608.9	19144.7	22483.3	20038.1	87359.6	84367	82137	71659.1	107669	40072.3	49791.3	43121.2	34359.3	36665.6	25785.9	23615.4	23859.5	28936.5	28079
Frmpd4	E16.5_MM	85.4331	78.972	113.344	115.068	83.769	88.8121	90.4965	66.8294	71.3084	75.7367	610.087	564.316	495.601	342.396	685.216	52.7107	50.699	53.2124	84.7969	56.9423	38.4181	33.8065	32.878	36.9485	39.5719
Hoxd10	E16.5_MM	17.0416	19.411	23.2648	14.3995	12.1921	147.443	126.256	126.202	121.982	163.731	242.462	350.908	285.901	256.56	345.135	51.7359	81.2904	111.308	67.1288	199.594	0	0	0	0	0
Lrrc15	E16.5_MM	83.0776	59.2546	58.1621	64.3743	63.7739	189.57	188.909	193.127	195.015	157.569	537.287	429.021	563.323	513.121	633.757	114.719	132.84	131.184	142.395	140.029	21.2632	12.2876	15.3464	23.9923	24.9061
Pla2r1	E16.5_MM	47.5103	72.7593	82.5336	77.3205	122.642	78.1341	171.033	113.206	121.327	78.7315	660.089	723.91	509.399	408.26	650.704	201.712	208.999	282.933	340.826	314.843	135.65	237.267	237.266	266.824	305.49
Adh7	E16.5_MM	61.6324	27.9983	111.49	77.8502	60.6338	157.61	146.273	42.2139	124.124	62.0856	2624.82	3095.66	2579.76	2346.43	3902.93	17.1238	40.0291	6.72497	5.67808	17.5014	13.8512	0.959394	0	0.450975	0
Lepr	E16.5_MM	134.745	124.299	129.563	154.147	155.886	487.707	527.973	1323.09	1384.67	388.607	1120.05	3445.54	1530.74	4095.17	2044.8	807.45	487.841	2334.34	463.824	390.414	1366.89	816.76	868.522	579.651	994.586
Ankrd29	E16.5_MM	110.807	164.663	142.793	283.077	92.5857	156.294	108.563	123.629	72.7157	154.728	425.397	942.791	614.13	292.852	779.689	112.545	164.812	210.617	104.845	131.48	79.3599	60.6961	45.41	38.3929	58.3604
C1qtnf3	E16.5_MM	119.097	148.749	66.9457	42.1287	70.526	16.9197	28.242	82.5788	32.8081	28.1142	593.021	563.874	1496.96	1343.64	373.343	249.333	434.468	98.0122	224.708	252.53	6.80206	1.03042	2.76148	0.852792	2.86828
Sim2	E16.5_MM	18.9067	3.05824	21.841	16.8828	39.7485	322.731	302.575	195.976	146.468	122.532	2646.34	2999.85	2754.11	1795.96	3884.1	26.9341	44.2419	3.03901	81.5494	10.3854	15.2497	18.3914	11.732	16.983	13.4201
Tmem100	E16.5_MM	590.064	538.399	476.154	597.156	585.22	1300.38	1393.56	1044.99	1145.23	1447.17	3294.3	4910.31	3333.9	3349.22	6673.63	982.982	768.293	840.109	709.938	722.092	219.719	216.451	235.951	151.063	194.268
Prr16	E16.5_MM	139.16	128.97	165.08	187.893	151.318	184.569	132.454	187.315	149.198	130.293	582.972	703.376	679.623	558.332	769.608	111.437	162.888	134.666	103.006	241.818	118.767	52.6829	82.9843	37.5722	69.0212
