# Supplementary material for: Mesenchyme instructs growth while epithelium directs branching in the mouse mammary gland
Source: eLife. 2024 Mar 5;13:e93326. doi: 10.7554/eLife.93326 (PMC10959526; doi:10.7554/eLife.93326)
Supplement: Supplementary file 2. [file elife-93326-supp2.xlsx]

## Sheet: mFuzzy analysis result
Genes	ensembl_gene_id	CLUSTER	Membership score	E13.5 VM_121	E13.5 VM_122	E13.5 VM_123	E13.5 VM_126	E13.5 VM_128	E13.5 MM_111	E13.5 MM_113	E13.5 MM_114	E13.5 MM_115	E13.5 MM_117	E16.5 MM_41	E16.5 MM_42	E16.5 MM_43	E16.5 MM_46	E16.5 MM_62	E16.5 FP_52	E16.5 FP_53	E16.5 FP_56	E16.5 FP_57	E16.5 FP_58	E16.5 SM_1	E16.5 SM_2	E16.5 SM_3	E16.5 SM_5	E16.5 SM_6
1700066M21Rik	ENSMUSG00000038323	1	0.189259	423.573	544.428	510.303	581.331	509.251	541.53	535.626	411.571	566.535	616.667	469.125	411.874	492.936	473.42	419.264	636.966	486.492	470.644	541.784	500.131	311.135	348.742	361.815	287.031	404.334
4930503L19Rik	ENSMUSG00000044906	1	0.447988	1582.57	1757.01	1447.15	1666.67	1693.49	1738.98	1779.17	1732.4	1729.86	2079.81	1311.79	1663.63	1451.99	1211.45	1424.14	1441.37	1399.08	1471.74	1297.36	1453.34	1487.58	1116.09	1204.47	946.257	1220.53
a	ENSMUSG00000027596	1	0.231536	119.339	110.063	86.7625	131.267	153.899	265.54	143.506	86.5441	199.235	119.362	277.968	255.634	205.529	216.345	298.305	1.24412	2.51066	2.93159	1.1251	4.04972	9.24128	8.37825	3.0364	9.00183	18.2535
A2m	ENSMUSG00000030111	1	0.30434	110.509	24.6089	27.3417	19.6744	33.6313	1226.46	1294.58	1420.64	1026.81	1245.26	84.1776	166.281	187.58	524.315	142.233	164.484	385.813	173.273	140.688	284.006	162.276	210.552	195.558	221.634	162.774
Adamts2	ENSMUSG00000036545	1	0.172332	2110.92	1929.95	2435.91	2218.8	1548.46	3226.19	3997.08	3018.92	3202.65	2514.65	3221.16	3232.36	3518.24	3116.66	3826.68	1319.46	1912.03	1147.93	1045.4	1197.85	2776.21	2260.47	2424.74	4639.87	2612.86
Alb	ENSMUSG00000029368	1	0.551449	364.997	224.411	270.415	349.921	286.755	463.691	446.594	412.214	546.369	537.745	215.866	88.7636	84.2783	99.7065	99.6753	4.82982	39.6007	10.2427	9.60913	6.2826	6.08741	4.059	3.29513	7.63195	10.2677
Angptl7	ENSMUSG00000028989	1	0.277314	79.8823	41.8869	68.2435	44.0455	38.4519	565.384	299.027	274.394	240.078	171.653	124.077	133.393	215.638	201.998	152.384	25.868	47.5846	19.8764	77.2999	16.7199	139.982	175.807	149.627	96.858	159.399
Apln	ENSMUSG00000037010	1	0.187656	1267.47	1073.73	1183.41	1081.66	1366.45	1562.01	1294.84	1331.81	1278.86	1342.42	986.923	1013.07	1034.58	939.173	1199.9	1072.96	1113.28	1526.51	1200.18	1670.95	403.114	350.669	355.844	249.698	345.697
Cbln2	ENSMUSG00000024647	1	0.50458	376.454	377.94	424.063	512.854	525.547	1355.01	1306.96	891.193	1052.31	1479.97	874.747	1006.74	936.55	835.97	934.647	160.341	175.195	179.925	144.961	113.069	16.671	26.4563	20.5186	14.3612	25.8735
Cbln4	ENSMUSG00000067578	1	0.373948	34.0831	34.7354	48.0807	22.8698	16.8813	371.38	684.44	470.389	473.941	426.053	10.2449	14.4209	26.6518	48.7581	10.0917	3.37408	4.95673	1.32509	6.10262	4.17998	2.65789	17.0136	5.7549	10.6633	5.97748
Col9a2	ENSMUSG00000028626	1	0.416141	640.753	967.082	573.205	566.346	391.934	1346.77	1001.74	841.567	832.121	694.68	666.751	970.41	746.456	621.669	945.761	342.092	337.213	443.681	395.399	471.241	503.713	669.786	625.122	610.575	518.001
Col9a3	ENSMUSG00000027570	1	0.616709	206.868	218.75	329.86	258.39	256.494	610.504	694.389	513.52	608.862	665.55	789.993	287.9	216.663	505.109	161.561	99.2846	147.286	128.5	109.298	63.4048	61.7544	59.0735	78.7571	41.6865	94.8058
Crispld2	ENSMUSG00000031825	1	0.351636	469.005	659.676	451.285	529.368	498.622	1054.76	1385.56	948.111	900.1	865.187	831.434	838.616	797.571	955.248	1296.57	232.253	97.5807	69.9046	198.277	134.403	404.244	432.425	442.673	483.674	464.107
Cthrc1	ENSMUSG00000054196	1	0.626485	616.278	827.664	579.363	618.012	623.752	803.052	697.814	894.799	794.998	743.302	379.006	352.144	670.837	785.819	420.686	542.208	427.034	310.393	453.861	218.965	504.737	309.296	345.887	264.339	411.209
Cxcl14	ENSMUSG00000021508	1	0.784866	1001.4	557.846	817.184	717.358	638.021	1598.95	1532.83	1355.77	1420.47	1768.83	586.066	586.13	787.168	903.275	1004.81	82.5825	49.3049	28.9403	39.5832	32.1108	1.05718	25.246	11.4842	2.12065	1.18877
Dkk1	ENSMUSG00000024868	1	0.523368	94.7937	64.3627	113.998	127.901	92.8473	259.412	288.585	301.164	351.959	542.249	163.918	233.137	147.797	242.629	383.484	11.2469	4.95673	9.27565	9.15393	9.40497	0.885965	0	0	0.888605	0
Eln	ENSMUSG00000029675	1	0.233645	2318.23	1604.03	2226.66	1620.94	1861.08	2559.13	4174.78	3557.39	4465.66	3886.48	2582.88	3677.21	4497.33	3416.16	3960.59	3980.33	1802.34	1530.93	3043.5	1468	587.214	783.202	619.55	584.591	567.794
Fgf7	ENSMUSG00000027208	1	0.142823	256.058	169.133	298.691	197.844	284.276	826.74	962.54	1154.65	889.134	878.354	777.157	985.694	678.327	590.242	869.094	535.103	726.513	579.404	571.472	616.279	634.438	938	692.132	535.591	692.236
Flrt1	ENSMUSG00000047787	1	0.290106	183.197	143.028	216.363	239.709	172.565	271.606	262.005	282.042	242.409	241.195	225.387	307.645	214.426	270.491	321.924	51.7359	41.6365	27.827	33.5644	44.9348	151.5	95.4651	158.26	188.384	175.339
Frem1	ENSMUSG00000059049	1	0.222415	1002.13	787.85	776.138	905.946	762.146	10493.7	10776.4	7311.72	7310.22	8591.12	8481.52	10767.6	8590.9	7583.26	13880.9	872.959	1332.99	1386.59	1142.63	957.061	1668.14	1262.32	1170.15	900.858	1173.44
Glod4	ENSMUSG00000017286	1	0.320792	1987.81	2617.83	2747.35	2150.61	1868.88	2481.46	2798.75	2311.81	2623.79	2422.03	1647.44	1464.59	1910.81	2017.13	2073.58	1657.54	1491.8	2270.34	2463.06	2030.03	1255.33	1368.2	1794.41	963.88	834.45
Grem2	ENSMUSG00000050069	1	0.608779	498.466	619.108	424.971	492.124	393.898	883.551	655.012	532.534	634.77	667.248	447.36	400.179	699.005	614.12	326.97	42.7384	52.5413	47.7034	32.5473	48.0698	59.3596	105.862	78.6502	95.9694	66.7485
Hbegf	ENSMUSG00000024486	1	0.424177	368.987	284.992	430.355	271.799	285.352	579.746	385.797	569.912	386.598	412.841	190.423	192.857	387.257	292.681	278.786	113.14	117.611	101.688	140.374	95.2156	271.044	176.252	245.708	317.299	195.602
Hsp90b1	ENSMUSG00000020048	1	0.309508	39872.8	37146.2	35059.4	26544.6	23505.7	28025.6	35658.4	43652.9	31708.9	39897.6	29805.2	22856.7	30591.4	31498.6	17121.6	21685.8	23021.5	34417.4	32005.7	32520	21107.9	15227.4	18983.7	16067.2	18173.7
Htra1	ENSMUSG00000006205	1	0.273067	813.037	670.492	677.972	799.451	430.556	1402.5	1473.2	1499.77	1811.92	1343.15	999.108	907.769	2251.14	1854.59	1021.24	1183.46	755.384	513.324	777.941	762.077	300.955	181.581	159.909	137.213	156.599
Igfbp5	ENSMUSG00000026185	1	0.352917	13693.6	15629.3	13907.7	15774.8	13399.3	14554.1	25992.1	18896.2	18433.8	18044	5290.87	5270.73	6189.38	5486.99	5195.03	5653.87	7056.92	4127.06	4626.86	3298.3	7281.1	3261.35	5684.02	7181.27	4853.28
Ism1	ENSMUSG00000074766	1	0.488886	490.817	422.892	414.602	571.128	484.565	597.068	553.916	437.368	577.6	615.494	206.112	208.568	331.159	370.54	298.956	57.2127	52.7959	55.9235	41.9033	47.2527	58.3241	39.8907	30.8415	41.6576	23.0247
Lgals1	ENSMUSG00000068220	1	0.340712	44878.4	38928.5	43305.9	38095.1	30991.8	45897.7	42071.3	40518	49901.9	45829.9	37182.1	40598.2	45376.1	54747.4	48705.7	28960.9	24082	31831.6	33665.4	28679	15110.8	27588.3	15846.9	13583.2	17027.2
Lrig1	ENSMUSG00000030029	1	0.399213	3576.78	4069.88	4470.86	4968.26	6549.48	4713.64	5743.87	3779.6	6292.88	5717.87	3429.23	3653.3	4449.75	3881.72	3494.93	3169.11	3466.72	2473.75	2822.03	1705.33	2708.59	3563.59	3177.55	2692.78	4907.76
Luzp2	ENSMUSG00000063297	1	0.509201	237.043	164.097	241.174	177.327	253.828	282.105	271.461	243.123	306.416	314.917	120.389	167.099	126.809	132.792	132.586	91.3408	89.0744	118.659	102.63	33.0043	117.941	117.319	109.262	68.9597	90.3646
Metrn	ENSMUSG00000002274	1	0.436909	770.865	991.216	1152.32	1122.81	1184.19	1234.82	1287.19	753.668	1521.02	1330.84	585.463	835.655	696.894	715.487	725.848	692.459	636.789	627.558	699.296	582.134	555.997	671.183	551.309	554.096	526.657
Ndnf	ENSMUSG00000049001	1	0.427324	2302.04	1507.52	1787.6	1971.82	1811.58	3820.68	2910.64	3824.63	2589.86	2168.85	2292.87	2026.64	1524.49	2509.44	2299.07	129.753	173.588	161.936	325.724	168.21	1064.71	1367.24	1625.92	1292.87	1363.41
Nlgn1	ENSMUSG00000063887	1	0.281619	385.779	433.778	252.31	435.064	372.565	564.032	552.179	555.948	516.393	622.553	712.312	656.059	566.445	461.09	633.409	157.732	259.017	262.704	237.318	425.926	332.839	306.749	304.809	273.667	381.588
Nlgn3	ENSMUSG00000031302	1	0.341494	223.564	196.285	313.694	339.612	463.603	593.698	656.825	402.697	397.263	425.351	489.68	459.963	346.95	321.365	690.432	144.618	237.243	174.131	147.285	280.409	322.877	250.743	284.847	295.224	326.57
Notum	ENSMUSG00000042988	1	0.78408	171.035	213.304	245.593	158.603	156.08	330.962	416.579	371.931	359.553	487.106	92.5813	129.752	141.553	159.43	412.36	11.9275	11.3092	19.4303	13.7669	7.07221	4.46878	2.63529	2.61016	5.01151	3.38889
Olfm1	ENSMUSG00000026833	1	0.201075	637.521	476.528	510.559	488.481	507.771	797.293	721.147	1098.04	758.355	836.277	633.891	760.889	693.508	685.09	834.054	527.895	600.206	460.919	512.846	508.755	639.633	705.428	646.878	757.712	822.246
Pcsk6	ENSMUSG00000030513	1	0.568956	1339.55	511.879	813.247	1147.76	597.572	1560.95	1740.06	1360.52	1667.16	1929.57	635.279	514.87	1166.09	955.645	706.921	913.458	776.532	543.757	601.342	370.415	257.453	128.544	392.541	161.608	177.395
Pcsk9	ENSMUSG00000044254	1	0.391448	464.383	373.917	452.889	488.736	463.299	495.543	499.328	346.099	575.722	517.601	380.199	415.802	488.213	607.154	536.877	83.2273	118.962	115.283	122.052	84.6447	62.9035	137.999	75.7728	103.078	126.523
Pgf	ENSMUSG00000004791	1	0.572265	186.697	194.782	193.428	172.257	165.32	522.741	419.425	367.119	420.147	399.26	206.029	214.421	196.203	286.303	172.458	114.389	112.494	126.771	147.191	103.253	99.7963	131.341	113.626	98.7682	69.3855
Ptx3	ENSMUSG00000027832	1	0.227464	217.781	188.664	183.904	187.54	155.503	671.307	749.624	710.527	670.932	665.324	100.055	106.818	110.981	96.5896	119.952	151.115	155.921	212.662	158.433	259.148	301.65	348.275	312.576	326.294	408.556
Rspo1	ENSMUSG00000028871	1	0.774074	1235.33	1014.25	1453.59	1391.59	1134.73	2526.7	2046.82	2111.55	2042.29	2189.19	1100.61	1308.29	967.515	769.11	1950.04	36.6627	50.7821	32.9107	49.7333	41.6405	17.8785	52.7663	17.122	47.3026	18.5575
Rtn4	ENSMUSG00000020458	1	0.456958	3850.47	6779.67	4983.82	4862.33	6307.55	6831.51	6294.87	5232.66	7257.36	7969.03	4783.76	5665.11	5642.21	4860.83	4819.37	5405.41	5665.77	5188.21	5278.5	4334.05	3812.56	5391.68	3796.5	3023.86	4555.37
Sbspon	ENSMUSG00000032719	1	0.377633	135.267	184.915	91.5084	149.077	81.5931	369.163	387.312	296.383	423.439	454.222	107.002	88.9287	124.779	111.447	96.8801	110.22	98.1433	74.2052	93.5735	56.4298	98.3421	112.479	104.547	103.078	143.459
Sema5a	ENSMUSG00000022231	1	0.372999	14599	13164.2	16513.9	20281.2	16356.8	18185.8	17955.7	15759.4	16178	16281.7	11551.9	10678.6	10016.8	9635.65	13104.4	6022.44	9349.6	6198.13	6078.35	9070.29	4701.99	3454.89	4405.02	5400.01	5307.03
Sema6d	ENSMUSG00000027200	1	0.415345	2453.84	1668.11	2021.32	2198.95	2362.57	3070.02	3354.33	2679.5	2931.13	3114.45	2379.81	2376.84	2393.73	2109.66	2649.55	1900.57	2259.09	2281.61	2085.74	2162.01	1437.5	1203.39	1306.4	1307	1472.21
Siae	ENSMUSG00000001942	1	0.179316	403.453	462.749	412.192	375.586	313.346	476.714	603.148	530.792	846.414	633.165	431.809	564.628	488.339	528.405	650.889	503.643	542.647	452.042	469.466	640.612	351.476	583.861	449.195	389.215	505.751
Sostdc1	ENSMUSG00000036169	1	0.751684	481.424	580.286	644.436	729.293	564.587	1067.58	950.242	766.772	972.744	1031.68	511.106	438.635	327.091	507.316	475.318	237.31	160.598	157.686	129.172	68.9697	93.9123	47.2599	50.8349	36.4328	52.801
Stc1	ENSMUSG00000014813	1	0.227751	372.784	371.874	401.706	362.529	432.35	784.886	797.406	887.238	623.893	654.924	882.198	760.701	683.256	602.51	725.592	291.296	454.036	451.857	409.893	581.018	420.833	498.12	414.352	486.956	483.179
Tac1	ENSMUSG00000061762	1	0.640061	170.52	233.849	227.777	216.296	292.15	1122.76	873.945	406.596	461.18	539.23	257.353	315.803	202.395	401.612	609.02	43.6	18.3739	22.5985	24.1113	37.7552	30.9755	24.5816	19.7729	27.8887	27.6128
Thbs1	ENSMUSG00000040152	1	0.195486	3624.55	3352.51	3764.08	3561.93	3706.59	7460.4	9939.66	7307.09	7667.3	7508.42	5062.15	3833.72	4444.84	4095.05	3854.6	3268.07	3741.01	3068.57	2809.91	3385.96	6070.19	5624.59	5732.1	6666.97	6451.49
Vegfd	ENSMUSG00000031380	1	0.307427	689.433	530.026	561.308	631.381	577.566	807.078	785.179	688.06	716.482	843.167	539.272	652.706	695.756	679.453	648.03	490.399	516.905	460.276	437.776	539.973	49.3042	12.8706	17.3361	6.76253	13.268
Wfikkn2	ENSMUSG00000044177	1	0.303382	254.861	344.369	327.761	262.827	219.128	924.451	948.517	871.62	748.086	575.93	533.086	392.579	271.646	385.815	431.077	89.7591	232.637	102.08	107.557	100.394	462.136	424.911	360.125	503.594	368.917
Wnt4	ENSMUSG00000036856	1	0.349514	1739.3	1017.54	971.695	999.495	943.479	1511.02	1658.41	2570.89	1523.6	1664.6	820.728	650.141	822.572	1044.82	727.61	749.046	642.392	1277.39	1381.23	1369.99	660.044	862.967	532.328	846.841	545.943
Wnt5a	ENSMUSG00000021994	1	0.531609	2493.04	2098.45	2626.46	2851.72	2155.07	7357.6	7476.54	7084.24	8004.03	8098.84	5289.74	5512.92	4874.47	3488.97	6023.21	792.389	1330.6	870.73	954.445	1227.75	336.696	382.642	85.0617	180.036	151.946
Wnt9a	ENSMUSG00000000126	1	0.466658	154.451	144.061	134.947	149.089	138.813	279.388	233.544	266.766	223.003	256.18	157.1	150.229	188.877	197.37	176.618	113.603	123.847	80.837	132.234	108.688	104.552	154.924	144.843	151.075	134.504
Abhd15	ENSMUSG00000000686	2	0.908665	21.1641	27.4055	31.5895	23.5633	27.9534	27.5355	26.4082	18.0479	30.8769	29.7356	118.187	127.754	93.8813	104.959	118.311	324.05	251.157	306.826	320.423	299.011	14.9639	16.9035	19.0588	26.4856	17.8164
Adam12	ENSMUSG00000054555	2	0.311266	1851.06	1746.1	1978.43	1869.92	1745.59	2396.26	1597.83	2023	1896.34	1597.52	6474.55	6455.67	5507.1	7372.01	5212.04	7161.47	8931.08	8622.62	8504.25	10727.5	3744.77	5165.01	5222.43	5263.16	5923.36
Adamtsl3	ENSMUSG00000070469	2	0.797275	36.1352	75.3654	37.657	25.5439	53.9227	63.5343	155.578	134.574	32.217	30.4178	138.838	163.454	197.455	133.782	95.8951	641.676	688.869	754.249	491.651	365.529	15.5855	19.5968	44.0923	13.3988	20.6551
Adipoq	ENSMUSG00000022878	2	0.655417	0	0	0.699167	0	0.845544	0	0	0	0	0.793633	66.7082	123.85	49.1495	98.3846	16.3771	6229.9	1950.31	1690.25	3099.64	1019.64	0	0	0	0	0
Afdn	ENSMUSG00000068036	2	0.456757	1539.75	2568.18	2935.56	3845.3	2028.23	2573.26	2250.07	1331.6	1652.13	1788.62	3087.6	2106.89	2928.74	2399.17	3387.06	5829.04	4801.45	3191.04	3455.81	4203.56	2298.48	2523.88	2268.88	4265.22	3076.39
Agt	ENSMUSG00000031980	2	0.791709	0	3.06489	3.87747	0	4.68926	5.54298	2.84788	7.6486	2.33086	0.880274	1560.64	1208.95	1121.8	1432.56	647.886	2123.42	2282.08	4265.48	2688.2	3523.73	6.20175	20.7944	3.8366	11.5519	7.96997
Aldoa	ENSMUSG00000030695	2	0.494644	8718.8	8667.26	8970.83	8241.99	7475.88	5441.7	6577.59	5728.16	6429.49	5384.61	6838.38	7348.1	6406.77	6724.8	6382.92	20032.7	16266.4	13576.1	15203.8	9518.21	6549.06	7176.83	6285.15	5767.61	5388.31
Angpt1	ENSMUSG00000022309	2	0.349141	239.984	305.878	223.733	195.73	222.176	663.831	653.873	718.17	588.785	739.457	401.869	390.553	424.116	382.43	286.367	1326.28	822.504	1191.43	1164.3	1209.89	252.551	186.208	160.898	167.156	215.859
Angpt2	ENSMUSG00000031465	2	0.369671	60.4599	48.7873	77.8846	95.9665	44.7865	53.9392	72.7037	77.5303	88.9068	81.0277	87.1807	136.783	191.02	173.134	73.6522	350.791	334.026	235.207	305.173	277.883	268.291	156.703	189.264	163.334	152.599
Angptl2	ENSMUSG00000004105	2	0.53633	971.015	1009.82	1067.44	982.03	854.668	1052.69	1064.53	1133.06	988.574	916.314	2009.99	1763.56	1958.56	2106.29	1732.21	3354.92	3795.05	2831.54	2978.37	2743.4	1835.43	1586.78	1566.57	1976.03	1342.27
Apoe	ENSMUSG00000002985	2	0.339078	3728.85	2958.72	2994.67	2445.27	1675.74	2631	2383.57	3336.67	2167.12	1773.45	5383.08	4002.48	3967.86	4471.6	3414.21	6277.95	5785.9	7751.92	7118.37	7891.6	778.735	662.913	609.653	642.705	695.341
Asah2	ENSMUSG00000024887	2	0.5432	640.825	587.106	494.035	508.947	652.639	664.92	570.748	636.83	773.041	557.461	827.161	921.328	826.854	656.451	857.81	1557.37	932.064	854.491	783.252	1054.05	654.057	583.604	664.297	712.74	714.098
Bmper	ENSMUSG00000031963	2	0.901919	36.8093	39.8672	37.0789	16.0665	9.43866	132.87	189.694	137.607	88.7561	87.4572	1141.22	1425.34	1382	1063.11	849.925	2479.1	3244.81	3629.21	2771.24	4733.7	29.1811	39.1018	36.8569	26.8291	30.079
C1qbp	ENSMUSG00000018446	2	0.375708	891.772	775.611	694.005	792.732	817.153	538.736	608.041	735.223	697.037	618.318	628.044	674.886	510.535	597.641	598.461	1515.49	1652.48	1065.52	1084.45	921.379	762.124	676.982	803.756	850.385	869.956
C1qtnf9	ENSMUSG00000071347	2	0.590739	219.41	177.764	182.241	125.36	157.559	191.787	123.408	97.5197	123.535	87.1472	355.156	249.962	354.954	276.296	230.09	635.452	475.846	789.756	746.554	868.392	1.77193	9.45199	9.59149	1.77721	8.96621
C1ra	ENSMUSG00000055172	2	0.428219	45.7992	28.6057	47.3052	16.9406	37.5141	44.3439	42.7182	58.3206	38.0707	54.577	359.709	378.548	391.297	297.192	245.228	719.804	487.742	602.917	502.449	531.903	88.5965	104.917	56.5898	73.7542	88.6659
C1s1	ENSMUSG00000038521	2	0.560585	98.3364	27.2501	64.4192	7.55926	35.5836	195.378	32.4756	132.261	95.1595	25.7501	641.618	698.2	536.957	345.348	684.371	1944.31	1277.94	1488.5	1562.64	1741.37	423.666	579.189	643.938	440.041	696.052
C3	ENSMUSG00000024164	2	0.923201	16.0316	26.6347	12.3211	8.49955	2.35273	103.223	18.2576	10.3933	54.4497	11.7775	237.017	280.498	230.97	203.86	164.556	1164.21	572.822	534.084	784.354	413.325	9.6311	15.8077	10.4267	6.68756	19.9937
Cd36	ENSMUSG00000002944	2	0.84609	815.316	903.709	765.884	632.171	731.115	1348.75	1533.79	1183.43	1134.8	1073.56	4825.5	4139.74	3923.22	4699.79	2418.65	20747	13449.4	18541.1	19303.2	18120.8	326.749	215.119	229.805	162.1	229.12
Cdh15	ENSMUSG00000031962	2	0.413685	339.766	162.439	435.828	132.984	404.214	243.891	135.749	526.798	377.599	247.357	243.6	194.682	115.087	183.423	137.247	845.77	1282.8	694.349	678.408	177.649	308.316	103.972	132.363	153.729	82.6884
Cilp	ENSMUSG00000042254	2	0.648992	21.2953	68.4533	32.5607	21.1692	27.1893	29.9228	41.7559	29.6291	17.8644	21.2561	28.4492	28.8328	53.2871	62.6695	35.3441	202.382	513.358	164.261	153.535	83.5737	91.226	34.9615	44.1072	39.0865	25.8944
Cldn5	ENSMUSG00000041378	2	0.278617	519.768	694.709	749.904	641.201	704.327	1089.75	879.995	576.513	894.272	808.092	884.474	931.348	978.849	932.208	924.398	1430.61	1116.26	1407.25	1472.77	1389.84	386.281	432.901	366.395	326.118	348.686
Clec3b	ENSMUSG00000025784	2	0.939715	1.0651	0	1.55099	3.38812	3.75141	1.1086	1.89859	2.86823	6.99257	1.76055	341.496	316.057	296.805	311.123	388.53	1396.87	2011.44	916.965	784.187	703.282	0	0	2.87745	6.22024	0
Col19a1	ENSMUSG00000026141	2	0.510666	68.2709	79.2077	52.8441	38.0862	124.805	55.9384	35.4902	42.9831	62.0479	40.1839	58.2149	61.8124	60.9443	65.5422	36.7018	206.454	359.024	289.161	256.292	102.338	100.025	89.0565	97.2054	88.8413	68.9603
Col5a3	ENSMUSG00000004098	2	0.804928	35.5253	75.4912	42.8634	50.0815	38.593	262.488	163.832	132.547	128.832	90.7403	5087.53	3366.55	3727.85	5060.19	3584.22	10851.3	10610.7	10493.9	10240.7	8886.37	321.048	451.76	366.371	421.882	441.571
Col6a6	ENSMUSG00000043719	2	0.795363	69.5892	54.7609	34.3435	36.4705	64.28	737.166	674.34	618.813	496.257	408.212	1356.47	920.491	842.598	1187.53	1242.17	5259.14	7945.64	4546.26	3866.55	3179.11	498.92	397.019	357.393	573.638	627.32
Col8a1	ENSMUSG00000068196	2	0.291133	149.164	161.947	235.052	128.485	124.939	113.544	108.63	169.339	166.529	109.041	73.8637	42.3481	107.038	238.921	51.8862	419.451	195.217	155.459	344.032	108.366	124.159	53.6695	54.4616	48.4994	24.8363
Cp	ENSMUSG00000003617	2	0.530071	62.3712	35.2468	28.9813	21.0943	31.8316	18.799	13.3419	44.6515	35.3957	58.0522	129.53	140.476	161.724	166.958	88.6287	274.55	241.087	268.588	224.958	197.303	38.304	18.9033	12.0109	37.4998	59.5429
Creg1	ENSMUSG00000040713	2	0.42075	650.506	744.597	488.033	553.262	574.385	532.175	420.787	506.726	414.806	583.765	479.078	463.207	722.609	818.081	422.764	802.288	656.844	739.998	888.536	996.19	411.025	480.949	480.414	408.372	451.184
Dag1	ENSMUSG00000039952	2	0.649202	3666.68	3190.31	3010.12	3399.11	2926.48	2955.34	2488.9	2966.41	2562.04	2522.49	3442.02	3506.98	2996.98	3693.59	3772.12	5622.32	6922.35	4898.81	4985.34	4131.9	2569.32	2564.8	2377.38	3054.59	2697
Dhrs7c	ENSMUSG00000033044	2	0.848929	6.3831	0	6.03353	4.99916	9.74301	0	4.99025	8.04185	4.12331	1.54894	33.0413	68.7294	34.1134	64.1975	12.5383	331.211	364.54	195.538	181.513	42.55	7.5897	0	1.42362	0	0
Dll1	ENSMUSG00000014773	2	0.20996	358.247	178.566	305.349	265.239	256.474	126.673	97.5564	235.637	93.9091	145.719	465.009	122.442	110.961	201.61	133.085	311.631	296.225	205.039	258.062	377.153	132.699	113.742	122.01	164.359	219.957
Echdc1	ENSMUSG00000019883	2	0.314158	460.919	617.857	421.364	390.709	435.956	602.586	371.576	495.587	492.461	603.876	310.628	362.768	370.875	498.728	311.683	726.108	368.192	1012.58	816.493	565.843	400.4	530.084	352.677	235.979	378.538
Ecm2	ENSMUSG00000043631	2	0.765287	102.88	70.2096	85.7191	49.5024	93.2056	89.1273	81.1531	101.86	60.7341	71.8778	152.932	205.148	217.101	193.675	162.718	418.024	357.989	375.891	366.655	422.676	136.56	142.496	166.784	93.7662	134.05
Efemp1	ENSMUSG00000020467	2	0.227369	1881	3392.64	1420.11	1938.98	1573.8	2702.48	3371.12	2597.56	2255.5	3505.22	2766.6	2236.46	2623.03	3257.97	1668	2334.19	2738.85	3856.36	2445.22	4465.93	1664.99	2749.18	2044.24	1674.77	1985
Entpd2	ENSMUSG00000015085	2	0.934192	7.00108	3.16113	3.19938	1.74725	18.3575	11.451	13.4741	9.28227	13.862	8.26601	53.4456	100.841	84.7757	123.184	82.0678	417.128	384.204	337.594	320.551	143.644	11.2227	12.4259	8.106	11.6819	8.5701
Fabp5	ENSMUSG00000027533	2	0.488645	3534.53	4061.14	3327.41	3510.82	3388.06	3831.23	3775.1	3847.38	3890.91	3844.66	3840.11	3354.75	3480.53	3773.24	3064.78	13278.4	7020.75	9003.11	11311.4	7531.27	1665.43	1656.99	1329.54	1111.24	1315.18
Fam20c	ENSMUSG00000025854	2	0.288538	145.066	142.106	207.464	115.129	142.181	113.491	149.524	121.528	94.4949	178.46	232.152	331.958	241.501	326.001	236.119	345.821	461.953	351.253	274.369	450.8	330.025	230.69	267.747	235.348	324.399
Fbln5	ENSMUSG00000021186	2	0.492625	813.382	777.37	753.279	956.812	581.183	1451.25	1251.52	1068.16	1140.09	1300.16	1264.67	1161.56	1475.49	1463.97	1441.24	2240.63	2195.86	1949.51	1713.31	2457.94	956.053	865.909	961.117	977.8	1074.74
Gsn	ENSMUSG00000026879	2	0.943089	2260.58	3488.63	2792.26	2929.46	2703.82	3439.86	3359.97	2690.25	3377.47	3241.79	8304.02	7754.92	7726.7	7732.75	6393.24	17644.6	18519.3	20561.8	17302.3	19732.4	3964.67	3442.76	3126.86	3184.27	3060.23
Hdgf	ENSMUSG00000004897	2	0.208312	4889.41	3716.43	3514.47	3949.05	3480.48	4761.54	4406.87	3110.15	4221.81	2922.16	4090.07	3384.49	3130.51	2331.83	3199.23	4467.79	4728.09	4872.08	4592.88	4454.97	3734.87	2360.88	2624.34	2587.02	1667.78
Hebp1	ENSMUSG00000042770	2	0.361935	276.263	171.344	144.594	128.51	132.963	212.135	166.679	259.744	181.521	151.332	230.531	250.863	221.409	328.002	307.31	693.256	390.579	478.333	569.092	535.78	438.687	410.305	395.403	245.755	313.017
Hgf	ENSMUSG00000028864	2	0.283708	168.221	82.3133	181.152	125.556	153.328	337.51	298.484	244.271	231.893	300.5	837.458	896.747	725.685	618.492	937.066	838.294	987.801	1386.67	905.275	1791.59	784.582	728.037	788.352	627.806	767.814
Hras	ENSMUSG00000025499	2	0.291486	609.442	810.052	751.241	821.49	889.261	766.215	720.229	504.395	823.548	741.987	655.456	644.809	740.184	665.623	749.607	1117.65	1067.86	671.633	1018.01	752.6	552.566	713.501	577.118	547.051	521.887
Itih5	ENSMUSG00000025780	2	0.395524	331.245	347.354	314.851	353.211	285.107	467.828	364.529	373.825	371.383	309.857	5350.1	4594.25	5902.17	7195.3	4621.99	8856.96	10204.9	8777.42	8462.3	10290.1	1375.9	1513.26	1229.63	1212.95	1458.5
Kitl	ENSMUSG00000019966	2	0.380382	1501.52	1474.68	1363.41	1706.65	1601.76	6321.81	4709.96	4329.61	3934.19	4454.14	6395.94	6167.15	6888.75	6466.94	5534.97	8936.25	10817.8	11216.4	8555.82	14633.3	1724.62	2101.74	1645.81	1595.35	2257.5
Lama5	ENSMUSG00000015647	2	0.803722	121.79	119.156	116.46	195.095	270.932	188.523	120.85	177.921	116.086	130.424	463.378	325.213	261.349	426.181	332.336	1271.66	1483.61	324.251	330.297	201.542	234.032	51.1577	78.2348	132.091	138.113
Lbp	ENSMUSG00000016024	2	0.886847	80.046	82.5984	47.7235	29.946	47.3132	101.948	74.3781	62.1442	37.9513	39.2634	82.3665	112.264	145.817	162.886	59.1402	251.427	230.509	278.766	223.879	261.954	78.2126	101.421	87.2146	64.2834	59.0303
Lmcd1	ENSMUSG00000057604	2	0.469869	138.463	133.834	145.793	102.491	120.045	135.249	130.053	227.546	160.052	156.689	144.567	203.094	99.3386	184.584	97.8893	881.76	972.51	438.606	607.211	176.604	308.316	282.614	215.809	271.025	257.031
Lpl	ENSMUSG00000015568	2	0.581615	4039.14	1172.42	2077.18	1124.78	2515.2	1701.13	1666.27	3379.44	1767.37	1552.62	3842.79	3806.77	3215.2	6320.61	2117.01	10330.1	9037.85	11536.1	9905.83	9265.12	3990.03	4499.29	4157.44	4735.04	4417.74
Mfap5	ENSMUSG00000030116	2	0.557493	9.9721	36.3862	12.2206	6.23412	14.8245	244.637	51.4771	102.94	81.0645	77.7365	1523.86	1280.69	1626.83	2206.72	1577.64	3504.08	2972.37	3162.33	3329.15	3290.22	133.268	242.461	107.55	120.228	211.786
Mgat4a	ENSMUSG00000026110	2	0.611193	250.95	428.684	220.892	439.04	647.471	309.073	255.85	641.71	291.107	313.325	679.641	565.363	381.897	305.918	537.523	725.365	934.515	733.913	791.389	851.359	558.894	246.406	487.781	568.58	606.274
Mgp	ENSMUSG00000030218	2	0.279303	69.1803	71.2626	69.9695	38.2119	30.829	212.917	87.5539	172.525	122.902	79.2377	150.635	107.921	150.085	107.501	114.482	395.878	231.72	141.861	301.979	132.386	4.44093	10.4232	5.76932	1.78166	2.99623
Mmp28	ENSMUSG00000020682	2	0.585574	157.24	263.119	225.606	200.46	217.427	210.811	133.422	111.067	157.74	116.848	207.196	232.314	212.993	181.977	145.043	561.651	638.19	592.834	517.042	618.621	119.41	47.5555	79.4108	100.138	107.442
Mpz	ENSMUSG00000056569	2	0.386892	87.7202	31.1701	87.8775	57.8759	65.5795	94.4867	111.224	106.461	108.802	78.2022	150.243	83.7916	111.179	183.135	92.3696	315.26	195.71	210.468	292.926	64.3716	34.9812	33.0791	53.375	17.5427	19.6678
Msra	ENSMUSG00000054733	2	0.76811	120.436	209.542	136.524	150.236	138.862	138.862	131.315	161.849	135.39	110.055	164.257	213.232	137.659	186.578	167.83	365.766	241.792	263.363	258.582	248.969	123.579	160.952	162.475	97.7788	98.6919
Mstn	ENSMUSG00000026100	2	0.671344	5.21065	0	5.05482	1.84037	72.4926	10.8391	1.85765	15.5797	9.88258	1.9126	38.9821	108.176	26.0771	43.1632	12.8363	682.274	937.96	729.941	629.943	240.279	74.55	26.8197	29.0925	42.6027	23.3943
Nampt	ENSMUSG00000020572	2	0.318792	1712.31	1603.65	1431.87	1173.56	1276.26	1152.5	1089.88	1608.06	1172.18	1660.57	981.023	900.484	1145.56	761.306	1016.88	3088.5	2343.74	2472.19	2351.75	1850.72	733.222	611.375	521.555	756.244	504.317
Ncam1	ENSMUSG00000039542	2	0.517796	5020.57	6100.57	4692.92	4463.35	4817.11	3215.78	3343.96	2770.58	3020.79	2935.42	8668.09	3466.98	2848.79	2437.41	3676.47	10600.4	18513.5	7173.32	10303.6	1620.05	5161.55	3258.36	3791.81	4294.17	3831.75
Nell1	ENSMUSG00000055409	2	0.202883	40.6254	32.2547	37.2458	10.4011	36.7723	249.3	251.714	338.302	297.331	270.851	129.229	214.343	156.93	175.902	189.551	178.708	400.316	462.364	190.25	650.04	194.552	361.032	244.639	229.258	347.641
Nid1	ENSMUSG00000005397	2	0.729301	9736.84	9529.34	9764.47	10873.6	9944.36	8199.48	10193.3	8965.1	9179.48	8635.51	13155.2	12136.6	12555.2	12442.8	12257.4	20953.2	26175.1	22199.2	18980.8	21698.8	10421.6	11172.2	11398.6	12613.8	12832.6
Notch4	ENSMUSG00000015468	2	0.343558	910.135	114.545	276.66	450.703	209.202	413.722	274.11	262.803	458.239	386.187	461.656	253.474	281.085	309.504	589.209	307.128	415.953	789.871	507.889	1014.95	162.449	86.356	467.22	241.494	125.362
Npnt	ENSMUSG00000040998	2	0.592855	296.012	188.618	205.966	130.82	184.319	112.583	145.483	235.639	121.376	140.155	439.799	439.501	269.747	362.624	364.241	810.135	1060.45	695.897	537.12	223.541	234.107	79.2814	79.1763	73.7993	109.857
Prelp	ENSMUSG00000041577	2	0.41121	23.1875	11.1206	16.8827	23.4692	18.5612	69.1123	43.2115	52.035	32.2912	32.23	1054.34	920.433	979.516	1033.91	855.55	1401.2	1687.49	2292.05	1465.44	1992.91	1.75343	6.5473	1.89827	6.15528	13.8018
Prss23	ENSMUSG00000039405	2	0.398414	407.574	477.232	303.965	354.016	297.752	577.717	493.69	621.522	462.251	403.341	514.618	474.305	726.464	1012.14	496.898	906.345	705.074	984.385	848.817	886.577	702.199	465.286	734.151	470.212	465.694
Ptpn6	ENSMUSG00000004266	2	0.511551	277.935	254.185	180.52	409.148	166.746	224.562	315.323	424.806	177.77	147.497	352.587	323.718	439.558	283.221	490.781	290.129	507.974	605.359	757.313	863.873	47.8548	59.0276	61.1997	151.511	502.311
Rbp4	ENSMUSG00000024990	2	0.713296	2.14766	1.03001	2.34556	0.853974	0.945541	4.47074	5.74246	8.67523	11.7498	1.77498	65.4162	63.9322	75.1634	62.2579	68.5276	275.073	294.588	146.345	217.037	176.999	60.1604	24.249	47.3836	65.4	53.5266
Rtn2	ENSMUSG00000030401	2	0.916425	165.308	95.173	240.436	97.0622	214.375	124.944	98.1515	208.875	154.808	152.276	283.602	298.847	325.959	251.982	267.129	709.723	982.104	498.422	602.396	168.139	201.79	174.626	175.918	157.421	185.808
S100a8	ENSMUSG00000056054	2	0.623468	6.40105	6.13982	0	3.39367	2.77289	8.79873	5.70508	8.57261	1.55645	2.64515	197.131	123.982	171.094	134.798	118.266	1983.56	144.974	133.954	360.188	136.674	52.3575	282.819	90.3077	72.0949	256.454
S100a9	ENSMUSG00000056071	2	0.568325	4.25119	4.07769	1.54764	0.867696	2.80748	3.3186	1.94491	14.3101	4.65164	3.51349	252.161	107.923	135.389	75.2959	123.859	2787.7	123.651	244.613	556.169	199.163	55.6952	449.886	152.175	112.609	326.562
S100b	ENSMUSG00000033208	2	0.815215	3.19529	17.3677	10.0814	16.9406	8.44067	54.3212	38.921	46.8477	29.5242	36.0912	243.6	293.224	294.382	279.778	215.962	520.733	485.76	661.222	630.604	889.292	38.9824	44.4243	35.4885	25.7696	38.8536
Sil1	ENSMUSG00000024357	2	0.752523	644.274	312.731	555.425	392.453	316.243	720.786	452.407	586.005	402.203	370.669	656.382	592.497	443.439	724.782	508.829	709.521	636.907	1066.46	741.782	944.47	515.219	610.86	553.026	257.204	357.472
Smoc1	ENSMUSG00000021136	2	0.454371	76.9646	66.6659	93.8629	124.61	67.001	334.348	208.878	137.987	246.528	183.397	135.795	232.862	177.897	199.416	201.792	1384.91	1235.81	889.955	835.432	904.845	353.592	408.482	424.457	508.41	400.584
Smoc2	ENSMUSG00000023886	2	0.24748	1941.96	1663.43	1542.76	1551.98	1081.73	2079.92	2386.09	2306.76	1780.7	2196.35	1234.96	1105.41	1587.91	1537.68	1320.4	3736.19	4597.16	2185.22	3276.53	1406.15	548.68	303.299	440.872	417.289	698.782
Sod1	ENSMUSG00000022982	2	0.40468	3182.29	3214.98	3141.76	2609.84	2692.4	2324.65	2827.65	2739.44	3039.37	2762.9	2671.98	3160.71	3236.11	2954.7	2997.67	4488.57	3577.43	4720.08	4594.55	4155.19	2291.14	2654.18	1907.99	1628.29	2005.91
Sod3	ENSMUSG00000072941	2	0.820371	2.1302	2.04326	1.55099	0.84703	6.56496	6.65158	6.64505	11.4729	1.5539	3.5211	92.2039	57.6835	47.2464	94.0334	64.5867	349.78	379.686	372.351	308.182	356.344	29.2368	35.9176	38.366	38.21	29.8874
Sorbs1	ENSMUSG00000025006	2	0.540469	1145.89	605.419	1013.88	738.192	969.086	1102.29	912.951	1217.86	846.631	695.805	1540.54	1337.6	1315.21	2102.75	831.268	1833.15	1996.41	1829.52	2190.05	1816.61	914.026	687.697	1069.54	1100.79	954.961
Sparcl1	ENSMUSG00000029309	2	0.796594	5289.32	3716.99	3806.02	3365.6	3543.33	3507.01	4066.41	4620	3509.52	3417.1	5891.59	5328.4	6206.11	5057.79	5276.93	9593.61	8430.93	13248.1	12200.9	11776.1	3031.77	3494.03	3067.13	2559.88	2564.88
Srpx2	ENSMUSG00000031253	2	0.366694	121.836	235.789	53.8605	43.011	30.6081	86.9567	47.2344	98.5537	64.4319	35.0377	496.556	447.879	431.981	521.139	528.069	781.006	751.77	747.85	816.084	739.189	293.446	436.51	317.388	332.642	287.983
Ssc5d	ENSMUSG00000035279	2	0.324536	16.2171	22.4687	32.3166	9.31436	36.2828	21.5681	28.345	21.8357	17.1858	11.9138	217.339	248.763	245.626	303.918	235.235	485.368	641.093	362.725	373.175	351.784	283.862	188.968	204.869	302.735	215.126
Tgm2	ENSMUSG00000037820	2	0.428459	127.208	112.321	133.923	122.412	104.256	794.678	634.152	528.314	491.094	927.916	474.128	494.618	489.693	523.988	755.443	1672.5	1537.63	1403.85	1456.73	907.4	246.499	419.094	218.534	296.345	255.293
Thbs3	ENSMUSG00000028047	2	0.557677	572.138	775.465	350.666	661.046	558.741	571.154	684.02	1038.7	605.831	315.838	1242.33	2103.8	1667.42	1644.54	1217.73	2240.26	2355.05	2112.59	2874.42	3136.71	706.26	962.793	1093.49	1185.21	819.236
Thbs4	ENSMUSG00000021702	2	0.407871	171.092	110.201	61.5162	107.12	43.605	121.643	107.694	144.915	129.324	96.59	82.5641	51.4044	68.7174	68.0096	85.3959	313.753	1048.79	115.826	244.015	155.477	283.973	62.4042	224.355	192.894	75.0384
Tnnc2	ENSMUSG00000017300	2	0.730887	220.824	130.29	208.29	8.26953	96.7574	31.916	28.8465	155.095	51.2629	25.4225	620.429	1327.99	267.417	592.389	255.636	6695.96	8106.17	7579.32	7284.22	1297.13	138.864	8.8085	17.7857	16.5124	12.5587
Tnxb	ENSMUSG00000033327	2	0.48322	31.4364	15.6059	26.9822	19.5556	12.416	37.3254	18.0883	28.2353	21.7523	16.1359	3661.51	2109.6	2862.7	3221.44	2920.45	6823.13	9782.24	3738.26	3837.43	3951.88	156.944	126.853	124.259	253.596	171.175
Trf	ENSMUSG00000032554	2	0.558973	592.961	481.298	412.272	346.221	429.874	356.271	558.766	565.687	345.552	458.82	1767.86	1044.65	1515.67	1622.8	1044.53	2161.41	2274.79	2887.93	2281.78	2848.83	308.654	249.602	368.696	277.215	380.138
Vtn	ENSMUSG00000017344	2	0.546198	1.89076	0	0	0	13.1697	9.04168	10.3232	3.64482	7.20596	2.22705	101.145	84.3769	78.4428	103.511	87.6927	218.243	253.818	191.878	245.436	157.469	48.3822	101.022	84.1461	63.7775	45.8553
Vwf	ENSMUSG00000001930	2	0.373093	239.796	157.366	259.375	205.123	230.032	307.105	191.779	307.199	324.306	181.203	582.092	519.901	1021.52	631.704	491.264	1134.68	955.557	780.594	1032.84	920.615	402.04	312.583	693.753	554.145	644.576
Adamtsl1	ENSMUSG00000066113	3	0.790431	2697.43	3526.34	3431.72	3905.37	3497.22	2578.93	3052.43	1828.42	2600.78	2539.45	1774.1	1394.75	1125.91	1332.91	1629.29	531.908	693.243	666.809	628.824	469.953	135.872	89.2406	149.373	132.635	185.133
Apela	ENSMUSG00000079042	3	0.613083	1517.88	1267	1416.83	1183.57	1432.4	460.978	468.219	443.1	478.827	545.68	74.5591	135.959	129.844	129.79	240.363	0	0	1.37172	1.00939	8.29654	14.0679	17.8225	10.4706	16.5577	12.3756
BC055324	ENSMUSG00000041406	3	0.684647	829.932	1151.4	1081.68	1304.9	1023.92	746.966	1049.82	1038.9	963.321	1080.5	676.141	803.227	740.834	634.692	1014.8	577.594	901.949	618.414	680.309	784.756	799.346	563.065	649.026	477.108	513.732
Bdnf	ENSMUSG00000048482	3	0.505457	303.319	291.363	342.285	309.298	370.329	291.131	404.642	267.55	290.365	296.115	103.581	164.724	149.441	101.397	169.601	24.6723	47.9164	59.8112	32.9486	59.3586	33.8818	51.4921	15.2836	12.2716	34.0339
Bmp2	ENSMUSG00000027358	3	0.277004	513.377	540.443	455.215	673.389	488.621	486.674	399.652	467.521	451.409	462.144	398.412	535.976	454.293	412.122	653.941	73.1051	83.2731	50.3535	64.0775	83.5997	272.877	242.916	211.013	229.26	204.23
Bmp5	ENSMUSG00000032179	3	0.336537	549.452	1226.46	606.23	861.944	864.541	200.627	174.275	314.275	181.196	138.778	52.0326	66.142	61.0257	56.3139	36.7149	222.857	316.379	189.127	299.75	270.02	247.164	116.389	112.738	116.052	51.1145
C1ql3	ENSMUSG00000049630	3	0.487436	518.703	628.303	694.068	703.035	870.326	670.701	665.454	478.038	686.826	683.093	95.6188	100.946	111.453	132.343	125.137	82.1026	87.2384	59.6292	83.4025	24.0349	19.4912	3.7808	15.3464	5.33163	8.96621
C1qtnf2	ENSMUSG00000046491	3	0.447039	1862.07	1414.42	2091.85	1718.08	1271.77	1513.1	1393.93	1375.38	1719.5	1275.17	884.8	692.472	1259.16	1212.96	1057.56	224.559	190.78	314.893	337.503	112.283	501.538	891.99	564.294	550.882	527.084
Calm2	ENSMUSG00000036438	3	0.529877	15170.1	13458.6	13733.3	12731.3	11388.8	11064.7	10754.7	10767.4	11690.5	11189.9	8161.53	8792.74	9979.43	8210.28	10162.9	9101.42	7465.59	8476.52	11103.3	9850.38	6805.93	7430.54	5703.46	4450.78	5903.43
Calr	ENSMUSG00000003814	3	0.413465	40395.6	33587.5	32289.7	29274.9	28025.9	31317.7	35110.8	33298	30734.3	32541.1	23225.9	21419.1	23753.6	20373.6	20933	19008.6	17692.2	25791	24770.3	26836	17498.3	20019.5	16898	14565.8	15284.8
Ccn1	ENSMUSG00000028195	3	0.69982	2062.03	2286.41	1827.07	1489.93	1682.51	946.741	1306.23	1054.55	1370.54	985.907	1010.83	853.235	1189.64	1215.47	932.471	740.049	552.18	711.575	578.732	606.098	520.947	396.984	306.928	237.258	279.945
Ccn2	ENSMUSG00000019997	3	0.407075	315.58	336.779	331.943	300.527	331.289	220.874	295.185	207.606	254.357	212.182	273.961	202.191	317.797	247	256.941	269.033	184.734	123.693	172.861	233.158	148.098	95.5705	116.315	100.13	116.697
Cdh8	ENSMUSG00000036510	3	0.635805	370.386	429.922	356.245	481.832	321.01	181.938	179.21	183.227	210.896	177.066	199.271	165.448	209.059	224.132	179.884	16.6485	46.0474	17.8399	31.1706	26.5431	17.9735	13.0964	20.8884	7.16451	34.3327
Chl1	ENSMUSG00000030077	3	0.31885	612.601	741.422	452.172	1302.04	470.872	239.273	173.811	206.85	214.789	236.901	167.144	190.252	138.628	254.523	235.302	315.638	316.95	492.786	240.059	246.431	190.903	242.836	132.094	210.997	129.084
Cntn2	ENSMUSG00000053024	3	0.532505	365.15	321.477	505.663	489.867	758.92	146.166	171.376	245.934	222.533	136.883	37.1938	40.2824	48.8749	63.9577	25.4108	38.4451	32.5483	36.6489	54.7401	82.0753	42.9887	33.9608	30.0881	46.5603	58.3887
Col11a1	ENSMUSG00000027966	3	0.260484	3750.19	5656.64	2139.56	3414.67	2622.53	2302.67	2655.35	2716.11	2516.66	2290.54	3597.72	3969.87	2903.23	2387.32	3779.98	1347.45	1298.73	1234.82	1383.29	1226.21	2174.04	1930.04	1947.24	1947.31	2423.49
Col9a1	ENSMUSG00000026147	3	0.40939	158.706	198.871	256.679	238.509	269.691	156.152	88.8279	111.301	124.068	85.5945	57.2976	46.7625	54.4255	103.887	61.5305	16.4766	23.3586	40.2439	40.9802	29.7816	189.648	61.2022	75.3798	45.5325	45.3849
Cpxm2	ENSMUSG00000030862	3	0.810714	4434.11	3588.25	3177.64	4133.72	2553.14	1619.2	2245.04	2287.6	1977.44	1980.81	402.017	686.684	606.569	691.581	1113.29	65.4695	21.3965	92.5165	32.2487	33.1268	0	0.637514	0	1.19869	7.09044
Dkk2	ENSMUSG00000028031	3	0.565318	7233.08	11956.1	5803.8	8682.9	7147.37	2872.37	3429.8	3774.59	3089.16	2890.82	2571.46	2696.7	2225.43	1751.81	2630.9	982.982	1323.45	887.812	1615.16	1308.34	1639.92	1656.93	1165.37	1177.4	1494.37
Dsc2	ENSMUSG00000024331	3	0.357045	637.062	1146.41	487.383	1106.44	728.058	19.7105	36.819	39.3655	45.0772	25.42	96.4236	51.7296	36.2765	86.3567	68.9696	93.5342	106.068	47.1937	69.3725	45.9603	24.2232	24.5654	32.9114	15.0239	22.0562
Dsc3	ENSMUSG00000059898	3	0.369842	234.228	655.999	301.395	579.801	377.378	62.9679	110.327	98.2345	325.957	199.054	567.124	151.504	72.9638	204.672	532.296	230.174	19.2611	8.64599	14.4918	38.241	36.5186	27.9668	6.21184	9.78345	29.882
Efna3	ENSMUSG00000028039	3	0.385966	385.871	369.759	313.288	294.066	202.895	371.941	217.378	222.788	211.312	215.864	238.9	196.106	222.469	175.985	392.879	12.035	8.84006	12.9978	45.6578	19.5688	48.9822	50.5713	47.8966	53.8825	61.2979
Egflam	ENSMUSG00000042961	3	0.289649	1415.71	1392.47	1374.2	1278.62	1028.16	465.844	745.832	642.723	719.686	499.312	1046.22	860.795	1314.63	977.441	1064.24	434.642	571.881	244.747	243.057	162.203	592.896	560.458	415.423	529.079	685.63
Emid1	ENSMUSG00000034164	3	0.254179	442.681	505.706	621.651	561.922	528.769	383.164	398.39	347.839	431.641	370.712	561.072	546.865	505.499	551.971	645.429	101.712	90.2949	104.988	88.5697	115.053	100.89	87.043	124.986	116.948	76.8685
Emilin3	ENSMUSG00000050700	3	0.273788	2876.7	2282.12	2989.07	3043.94	2534.03	3357.01	3131.74	3013.08	3308.43	3181.81	665.047	774.689	707.969	795.182	978.075	340.877	510.524	264.359	417.421	167.132	1048.46	935.122	964.424	1107.46	870.094
Enho	ENSMUSG00000028445	3	0.360324	206.629	297.295	252.036	326.106	284.169	156.312	151.887	148.192	167.045	163.731	145.705	138.2	138.105	138.148	171.559	181.076	174.477	117.933	123.07	66.8798	184.281	181.478	169.769	147.508	110.583
Fbn2	ENSMUSG00000024598	3	0.668313	21161.2	22865.4	23668.6	29156.5	24900.7	18053	23080.4	16548.9	20015.8	17010.8	18559.1	16176.2	17978.5	16491.6	17851.3	11067	16342.3	11730.7	8806.61	11491.2	10659.3	6850.15	9422.24	9999.08	8448.76
Fjx1	ENSMUSG00000075012	3	0.503144	2697.89	2640.92	3077.94	2724.05	2586.6	1335.86	1262.56	1235.25	1651.02	1603.86	278.888	314.856	339.205	352.916	325.961	211.442	212.148	229.241	225.797	172.424	499.684	670.146	474.779	570.485	555.905
Gfer	ENSMUSG00000040888	3	0.170115	825.182	834.236	837.658	763.089	643.568	752.91	587.614	651.882	703.295	815.65	560.122	564.586	500.774	683.959	661.069	922.971	719.123	859.585	865.277	680.817	506.468	577.856	482.345	492.55	524.969
Gnai2	ENSMUSG00000032562	3	0.23205	6043.33	4886.71	5591.76	5191.32	4912.66	4668.75	4363.55	5103.55	4696.81	4783.23	5206.13	5233	5215.02	4874.04	6068.69	3858.49	4546.53	4587.15	4000.13	4875.12	3324.18	3414.47	3175.49	4156.32	3311.81
Gng2	ENSMUSG00000043004	3	0.60374	2955.42	3221.1	3629.81	3185.03	2465.63	3173.19	3005.05	2520.03	2669.67	2690.44	2241.61	2157.62	2687.98	2276.2	3069.1	1701.44	1510.42	2168.08	2310.51	2182.71	1883.79	1656.05	1458.65	1794.48	1835.17
Grem1	ENSMUSG00000074934	3	0.433273	3401.92	3427.57	3895.31	3543.97	4490.43	3135.11	4020.26	2691.35	3716.94	4657.53	282.303	325.671	438.544	394.708	153.393	56.2347	56.5067	26.5019	74.2486	31.3499	40.7544	12.2876	22.0604	12.4405	45.8273
Hmcn1	ENSMUSG00000066842	3	0.738152	14524.9	12159.2	9914.31	14353.1	11174.9	6426.05	6747.6	6460.87	6314.79	5561.04	3104.47	3488.27	4325.67	3499.62	5838.78	1017.52	1098.53	1249.04	1723.42	1332.04	2383.98	1189.16	1780.98	1659.37	1753.4
Hmgb1	ENSMUSG00000066551	3	0.353918	39730	34365.9	31740.3	31918.1	30864.7	32800.4	35232.8	28616.3	36446.1	35772	22097.5	22890	22377	20072.6	23386.2	26978.6	21506.3	27215	27195.8	23896.1	19889.9	16946.2	14764.3	14944.5	14430.9
Hmgb2	ENSMUSG00000054717	3	0.275084	4152.61	4164.74	3818.3	4514.06	3872.68	3682.51	3730.4	3559.23	4692.41	3701.52	2878.75	3391.91	2399.37	3043.33	3347.64	4012.95	3602.3	3397.85	3932.08	3077.03	2511.25	1561.32	1770.92	2250.29	1798.78
Hnrnpm	ENSMUSG00000059208	3	0.39822	9344.99	7998.33	6651.39	4577.29	8054.11	6026.53	7212.2	8592.91	6757.5	8279.19	5143.86	4362.34	5074.09	5137.03	2946	4582.86	3239.32	5254.8	5596.8	5326.85	3028.48	3954.04	3317.54	2416.44	3340.35
Hpse2	ENSMUSG00000074852	3	0.7103	2120.58	2106.1	2735.4	2464.74	2976.39	1530.87	1562.64	1605.92	1440.43	1408.32	1518.04	1318.6	1233.63	918.107	1297.98	145.546	200.987	117.04	264.78	198.644	10.6035	7.70985	1.42248	18.4748	6.41172
Igsf10	ENSMUSG00000036334	3	0.533539	11601.4	11023.3	10954.4	13235.9	13130.2	10839.5	13425.2	8448.69	11237.6	10353	7055.9	7283.9	8058.36	7625.37	7685.88	3784.27	3812.19	3284.8	2815.59	3040.23	2554	2740.07	2303.82	2161.79	2557.33
Il33	ENSMUSG00000024810	3	0.403341	1584.23	2362.72	989.925	1281.66	1042.38	284.461	182.184	133.692	194.412	250.508	163.34	103.471	156.876	51.7575	144.052	348.052	160.492	231.971	206.798	71.6606	47.8918	46.3773	7.91104	5.01471	22.7564
Inhba	ENSMUSG00000041324	3	0.628858	3081.14	2994.47	3889.29	4211.44	3712	1590.07	1975.09	1784.5	2281.92	1874.25	1851.6	2200.15	1431.38	1140.37	2680.85	112.598	86.4734	39.4042	79.6466	38.3258	266.971	228.606	199.655	226.369	247.865
Itgbl1	ENSMUSG00000032925	3	0.585233	2704.32	2539.99	2956.41	2782.01	3309.35	759.985	1168.37	872.206	1308.35	1516.99	41.5024	42.2525	48.3527	70.878	44.7114	2.49879	9.91137	2.94403	11.2988	3.77949	3.91536	0	1.0655	2.94527	0
Jam3	ENSMUSG00000031990	3	0.566369	2838.41	3791.21	3977.93	4338.4	4554.41	2736.64	2755.67	2106.06	3103.02	3254.83	1551.29	1754.62	1828.93	1670.72	2077.45	1605.04	1847.72	1421.66	1542.66	1310.71	1898.14	2087.24	1784.74	1686.47	1786.02
Matn4	ENSMUSG00000016995	3	0.558929	325.309	502.435	337.273	415.735	457.076	128.496	129.215	90.6881	206.688	167.574	44.1695	37.3025	33.2622	31.6172	24.9808	28.325	14.9938	14.6717	32.7017	13.5442	29.5695	11.4573	19.0203	32.0151	8.48679
Mfap2	ENSMUSG00000060572	3	0.217054	4337.23	3144.18	3441.24	3049.98	2615.06	2411.56	2721.3	3003.4	2709.68	2664.71	3157.68	3462.14	4266.76	3979.23	3694.35	1324.93	1426.41	1470.73	1370.1	1643.22	1253.44	1733.61	1447.94	1278.12	1188.21
Mif	ENSMUSG00000033307	3	0.287736	3068.85	2764.59	3008.31	2503.56	2429.23	2096.15	2432.44	2332.61	2710.63	2309.17	1584.8	1383.12	1613.73	1662.79	1608.86	2910.16	1810.35	2242.22	2564.17	2168.11	1337.85	1859.78	1319.05	940.047	1074.05
Nav2	ENSMUSG00000052512	3	0.378639	1083.16	756.43	1178.96	1341.26	1038.9	852.965	793.432	861.832	976.055	818.117	1038.21	795.095	704.662	795.07	813.669	811.064	920.73	549.407	580.6	383.329	395.656	103.665	213.06	287.006	212.634
Nectin2	ENSMUSG00000062300	3	0.360174	2646.34	2196.44	2518.33	2232.62	1710.67	1932.4	2239.36	2488.21	2002.57	2379.14	1209.33	1099.45	1205.23	1715.63	1180.32	1116.45	812.747	903.614	1206.18	930.193	1366.28	1014.83	1460.17	1572.77	1257.64
Ngf	ENSMUSG00000027859	3	0.436986	334.137	289.93	380.498	289.85	311.794	216.59	241.738	297.657	233.008	237.966	259.414	199.159	342.341	119.3	334.878	49.8969	58.0264	55.1134	102.3	97.3695	101.171	129.353	72.1217	86.593	85.5099
Ntf3	ENSMUSG00000049107	3	0.40688	332.297	285.549	269.84	313.848	259.597	203.436	203.908	230.156	235.068	300.018	82.0979	84.2089	120.41	91.2302	150.379	24.7009	32.1142	9.86224	27.3042	16.6913	152.342	107.589	75.0053	105.025	111.37
Ntn4	ENSMUSG00000020019	3	0.359842	413.719	431.037	331.003	402.354	303.454	157	149.377	183.514	165.812	168.817	253.009	247.013	289.517	326.032	307.672	118.353	117.971	69.0693	84.0248	60.6359	27.011	24.169	31.1288	24.4698	31.353
Ntng1	ENSMUSG00000059857	3	0.753249	362.943	217.676	323.97	326.179	360.143	158.134	178.966	165.42	182.675	151.481	84.8191	66.7575	74.4023	105.04	200.898	90.2366	23.8863	21.3524	39.4107	86.4727	48.6938	50.0606	47.3988	50.7927	51.8405
Pamr1	ENSMUSG00000027188	3	0.361671	2215.52	2463.54	2126.93	2258.61	1715.21	948.154	625.929	1017.36	690.1	604.288	1077.66	867.258	787.429	1898.15	805.125	1253.68	1076.61	958.46	853.519	773.16	231.649	89.4212	107.935	104.692	154.488
Pdap1	ENSMUSG00000029623	3	0.371285	4266.6	3073.77	3387.93	2262.78	2726.63	2701.45	2875.85	3099.82	2742.79	2692.83	1961.42	1605.81	2065.53	1479.54	1597.11	2079.52	1409.32	2842.62	2775.96	2567.78	1394.79	1761.97	1303.01	1147.3	1157.44
Pkm	ENSMUSG00000032294	3	0.587626	43745.8	26803.4	39654.2	27648.7	24285.1	21120.2	20365.8	28848.8	21403.1	21351.1	10428.5	9820.73	9868.64	11463	11921.8	11091.5	11250.8	15698.3	13717.3	13359.6	10015.4	11379.2	9697.3	8535.1	8510.1
Prss35	ENSMUSG00000033491	3	0.364591	2635.08	3879.86	1629.8	2462.93	1603.79	1664.34	1219.42	1969.21	1445.06	1172.96	1429.26	1450.07	1538.01	1696.49	1572.53	1946.9	1449.7	997.995	1632.64	938.393	191.153	148.229	139.878	129.59	232.859
Ptma	ENSMUSG00000026238	3	0.386642	59022	61550.6	59196.3	49601.8	60638.3	58948.1	62246.4	45518.2	60280.9	60941.7	37161.5	38183.8	38571.5	31101	40684.7	43815.1	31474.1	41771.5	43629.5	40453.6	28101.6	28875.9	25150.1	17760.9	24488.7
Rspo3	ENSMUSG00000019880	3	0.486913	690.65	949.577	309.023	487.172	391.21	288.341	267.404	294.937	302.741	262.65	249.147	277.182	299.634	283.858	320.918	144.608	210.167	76.7335	170.706	120.002	194.783	197.582	215.58	190.13	295.298
Runx1	ENSMUSG00000022952	3	0.476401	1540.41	1672.27	1806.61	2076.32	1759.63	388.973	448.539	472.042	496.879	453.92	932.601	478.106	630.916	885.316	561.491	272.744	240.497	196.513	170.106	208.251	88.7015	131.324	55.7837	64.7202	66.191
Scube2	ENSMUSG00000007279	3	0.754869	1339.07	1041.83	1116.04	1332.81	936.861	653.466	443.517	541.695	501.636	450.252	309.801	217.011	516.005	534.565	248.014	94.2433	149.817	85.2073	85.8006	137.412	16.2568	4.99554	15.2078	7.82738	15.8913
Scube3	ENSMUSG00000038677	3	0.325452	2860.74	2663.3	3317.63	3048.89	2744.11	2707.23	3462.65	3392.22	3102.69	2801.35	873.984	808.399	571.892	615.295	917.41	226.874	362.954	539.866	311.257	392.38	1048.61	727.406	865.435	1011.05	977.775
Sdf2l1	ENSMUSG00000022769	3	0.37822	404.737	432.15	504.072	476.878	468.926	488.891	405.348	258.14	442.863	467.426	244.739	340.092	359.8	383.099	350.181	357.653	303.352	295.496	379.38	342.759	180.737	198.492	147.709	143.954	227.144
Serpinc1	ENSMUSG00000026715	3	0.316208	1205.67	724.926	1057.11	1229.77	1004.72	1169.53	1224.86	1057.77	1342.53	1452.97	45.6285	46.4966	88.632	138.224	52.1849	14.5495	33.2843	47.8972	49.4965	39.7877	22.2941	18.9073	17.1578	20.526	19.6894
Slc9a3r1	ENSMUSG00000020733	3	0.444944	744.503	679.384	583.172	631.884	569.276	317.059	272.447	179.742	272.71	271.124	194.653	201.892	201.1	250.756	214.953	285.672	234.949	272.969	252.242	266.474	116.061	137.054	104.547	118.184	122.538
Sulf1	ENSMUSG00000016918	3	0.384123	15841.6	11203.7	13847.2	16358.5	15454.9	15425	16118.8	15337.6	15967.3	15388.7	4665.62	6332.23	6689.3	5499.32	7224.52	3364.36	2892.03	3197.33	3026.21	3605.11	1366.79	934.327	701.196	817.768	1340.89
Thsd4	ENSMUSG00000032289	3	0.440894	5758.36	6065.24	8668.8	10528	7792.14	8314.55	8366.96	5217.13	8784.77	6068.51	4792.37	4609.18	4947.4	5799.01	5138.86	1898.07	2574.21	2421.4	2088.34	2336.38	962.876	716.727	826.068	691.617	1304.54
Tsku	ENSMUSG00000049580	3	0.410807	1253.93	1135.56	1226.66	1109.47	1125.81	1269.33	1256.31	1057.54	1134.51	1082.17	868.801	1067.32	840.45	967.609	1003.61	829.616	818.074	987.809	742.939	831.03	653.507	668.48	708.18	661.101	652.571
Vcl	ENSMUSG00000021823	3	0.16392	5171.34	5636.73	4760.22	5558.84	4939.1	2939.1	3577.05	3578.75	3298.34	3345.13	4524.25	4061.18	3810.11	3425.64	4024.24	5274.86	5815.09	4583.85	4303.48	3589.79	4018.98	3617.52	3363.15	3963.54	3559
Vegfc	ENSMUSG00000031520	3	0.650541	824.888	885.055	1036.52	1091.54	1017.52	715.375	580.087	586.912	680.381	766.409	272.873	429.33	434.698	324.914	307.544	157.05	181.455	162.529	179.597	166.626	386.533	200.221	331.254	195.347	347.981
Wif1	ENSMUSG00000020218	3	0.58451	653.439	1004.36	820.547	864.74	812.169	595.722	849.272	547.236	858.67	784.092	129.593	92.0169	280.214	463.939	157.692	2.14905	29.3646	19.2084	26.6876	14.9758	31.8285	9.93342	2.7491	3.39587	0.951808
Wnt11	ENSMUSG00000015957	3	0.610698	2535.4	1819.94	2770.28	2610.47	2306.67	1877.24	2002.15	1667.23	2261.47	2121.35	983.124	1157.42	1275.39	1187.28	1675.93	188.285	272.539	141.591	204	259.941	252.07	349.134	293.612	317.881	342.856
Xpnpep2	ENSMUSG00000037005	3	0.627179	488.863	451.154	397.765	373.941	396.081	360.344	345.356	399.384	307.114	317.43	227.759	212.78	243.182	509.822	313.468	169.121	190.585	213.744	264.649	234.173	201.514	252.934	300.656	262.269	263.558
Adamts20	ENSMUSG00000022449	4	0.690682	1943.43	1737.52	1587.99	2289.69	1744.44	1020.91	1128.83	1271.4	1287	1408.26	376.337	404.362	550.395	481.168	467.52	297.113	310.383	199.84	217.187	173.083	1496.96	1130.87	1277.76	1417.8	1232.68
Adamts7	ENSMUSG00000032363	4	0.479937	828.514	1061.67	949.058	922.964	854.167	649.908	963.727	740.227	759.8	629.872	602.618	622.693	648.421	579.321	870.356	414.253	606.642	417.73	440.592	369.457	938.657	874.871	910.988	1291.17	870.759
Adamts9	ENSMUSG00000030022	4	0.504443	8661.32	8841.9	8696.45	10979.5	8424.9	5846.43	6457.64	5778.4	6336.46	5730.69	4941.81	4245.7	4784.16	4234.82	4833.69	3156.09	3959.09	3443.52	3169.4	3408.4	6213.77	5673.46	6992.18	6838.03	6935.43
Adck1	ENSMUSG00000021044	4	0.363794	309.064	479.635	406.208	451.162	451.243	426.651	409.473	330.681	375.248	397.715	292.323	358.049	268.252	262.31	323.181	319.827	289.975	323.082	310.513	320.047	530.404	500.353	450.496	446.653	431.914
Agrn	ENSMUSG00000041936	4	0.535973	3750.76	4009.78	3842.49	4661.09	4100.35	3263.14	3810.32	3149.75	3372.99	3102.45	2993.38	3007.72	2961.39	2520.15	3371.69	1449.3	2289.45	1686.24	1317	1440.99	3989.26	3008.07	4122.95	4640.35	4323.76
Bmp4	ENSMUSG00000021835	4	0.336005	2345.37	1556.87	1815.11	1269.05	1019.21	684.72	1604.44	1278.93	1388.92	1858.95	250.144	69.0834	171.69	44.9647	217.892	240.487	129.603	239.212	163.92	22.5714	377.079	967.826	920.866	523.622	180.138
C1qtnf7	ENSMUSG00000061535	4	0.343867	1355.19	1374.65	1600.13	1535.64	1347.29	514.409	722.221	766.954	948.557	1035.86	214.606	129.568	366.538	339.812	136.42	254.789	311.561	190.52	274.647	341.783	849.727	633.608	569.797	428.103	626.271
Car11	ENSMUSG00000003273	4	0.273017	81.6036	143.5	51.2742	66.1102	150.261	206.763	277.708	229.376	167.925	299.9	28.8495	92.4086	71.8292	64.416	28.5282	21.9712	19.3601	9.39673	35.3554	12.1287	242.45	286.996	259.547	101.544	217.729
Cd24a	ENSMUSG00000047139	4	0.36785	5923.33	5311.72	4839.22	4725.98	4700.08	2192.75	2599.61	3080.62	2891.26	3033.25	2080.73	1157.48	1427.43	1756.28	1502.93	1231.08	1129.82	1394.74	1363.25	1579.83	6736.38	5606.42	5271.22	4988.13	6232.97
Col20a1	ENSMUSG00000016356	4	0.51874	189.297	129.996	240.776	159.844	301.245	231.047	227.208	255.773	209.616	230.452	118.05	137.895	170.99	116.5	122.091	129.588	189.766	91.677	98.1652	62.0117	240.943	130.601	177.903	295.36	130.971
Col26a1	ENSMUSG00000004415	4	0.538803	18426.5	8141.81	14355.5	12001.5	5634.47	9175.21	6710.01	12608.6	5856.04	7794.51	2656.92	3047.05	3083.2	3426.89	4229.07	485.64	1131.23	734.489	864.71	506.133	5100.59	6572.68	8073.24	7589.13	3681.92
Col4a5	ENSMUSG00000031274	4	0.215295	1990.47	2610	2224.23	2243.97	2408.03	1171.81	1142.62	970.665	1197.35	1126.66	1317.16	1243	1364.32	1049.55	1221.52	1186.94	1190.9	1701.94	1149.46	1826.08	1883.71	2313.61	2688.14	2628.19	2202.29
Col8a2	ENSMUSG00000056174	4	0.261467	1792.28	3409.82	798.194	1403.28	1012.71	824.386	902.626	835.917	969.714	805.464	267.835	317.665	262.754	257.412	438.739	867.349	1059.72	655.637	1104.22	1011.84	1768.03	1688.56	1719.77	1818.82	1675.57
Dhrs4	ENSMUSG00000022210	4	0.220181	659.088	581.392	512	416.823	420.364	424.259	436.107	464.701	465.351	448.599	329.071	347.593	343.548	405.196	391.405	508.027	327.332	561.962	429.63	488.119	587.661	511.582	613.276	648.653	394.13
Edn3	ENSMUSG00000027524	4	0.231461	388.224	373.32	378.804	339.092	436.634	639.016	837.891	809.567	713.59	729.608	303.581	359.12	360.513	395.265	495.175	242.447	316.862	196.224	229.332	120.491	812.925	680.338	784.249	824.216	634.541
Efna2	ENSMUSG00000003070	4	0.749793	738.113	729.444	680.109	592.074	564.587	686.221	500.277	733.31	630.108	656.685	354.017	317.259	403.412	352.916	442.015	194.572	230.984	250.443	247.156	279.014	589.167	722.132	606.182	620.246	659.515
Efna4	ENSMUSG00000028040	4	0.700596	544.265	665.082	573.091	552.263	533.638	669.592	559.134	434.058	609.131	588.904	306.208	319.663	267.73	290.227	319.906	120.342	132.84	115.283	145.446	140.029	536.009	631.393	566.857	639.796	499.119
Efna5	ENSMUSG00000048915	4	0.415606	981.217	1136.68	1058.82	2346.07	1131.37	643.28	547.029	561.583	616.17	556.414	364.704	371.917	552.349	519.412	412.941	315.83	495.251	152.922	125.589	222.122	834.298	501.621	767.505	1314.7	898.469
Efnb3	ENSMUSG00000003934	4	0.605207	1290.9	1362.86	1458.71	1370.49	1237.96	1333.64	1389.77	1341.37	1598.97	1365.31	281.165	379.75	356.165	273.974	446.052	88.8508	108.057	71.555	94.5906	125.4	1424.63	1619.13	1707.29	1612.82	1436.59
Egfl6	ENSMUSG00000000402	4	0.37344	1964.04	2521.38	1047.69	1346.78	1007.25	1513.23	1435.33	2051.74	1566.34	1394.35	308.485	388.162	531.825	651.269	341.099	313.79	524.422	124.559	371.243	243.484	2320.34	2526.52	2594.5	2205.52	2376.05
Fbln1	ENSMUSG00000006369	4	0.457229	8050.85	5922.49	7143.57	7930.83	6536.21	5178.67	5297.14	5702.21	6130.03	5547.11	4102.57	4850.66	4577.98	4785.81	6726.34	1323	1942.18	1124.98	1190.63	1158.62	5264.65	5758.55	5625.32	6650.82	5312.09
Flrt3	ENSMUSG00000051379	4	0.663471	7436.25	7482.67	8107.31	8510.32	8927	5356.56	6148.72	5902.32	6664.66	8490.65	703.711	802.776	805.749	854.601	785.928	598.472	877.974	770.164	762.408	895.234	5467	6055.06	5851.21	5420.19	6040.07
Gfod2	ENSMUSG00000013150	4	0.364277	393.609	403.231	532.898	410.221	475.404	483.376	498.717	407.479	523.274	558.053	401.635	387.345	378.048	300.498	554.416	266.17	344.22	349.428	368.074	349.971	518.752	484.98	534.889	500.494	539.579
Gm1673	ENSMUSG00000070858	4	0.298747	167.899	167.019	163.751	133.455	160.971	286.496	233.247	126.554	279.642	198.791	74.8074	170.271	207.128	181.967	156.364	71.4964	79.4272	67.0381	75.3144	53.7853	172.198	291.33	173.102	193.452	203.872
Hapln1	ENSMUSG00000021613	4	0.262117	285.766	507.082	286.616	276.635	174.447	243.062	174.368	353.206	261.995	267.06	367.18	377.12	176.708	382.732	134.481	106.669	145.452	236.075	148.812	114.165	170.713	137.872	262.044	397.733	332.657
Igfbp2	ENSMUSG00000039323	4	0.698937	3389.29	2787.07	3577.37	3218.88	2716.58	2306.22	2459.12	2510.3	3019.26	2922.75	315.537	302.261	478.693	375.837	307.719	323.878	408.085	191.704	221.857	70.4245	2578.09	2439	2462.85	2441.29	2035.81
Lypd6	ENSMUSG00000050447	4	0.615008	675.061	305.522	515.024	396.707	287.076	172.185	165.919	450.638	452.312	510.661	79.4037	64.877	95.5614	87.8461	85.4209	56.3875	67.2127	59.6057	41.7732	120.635	318.49	571.021	650.988	461.584	254.928
Mdk	ENSMUSG00000027239	4	0.733235	8404.15	8295.79	7680.01	7204.56	6314.51	7802.14	7422.05	6934.76	7748.62	7343.13	3588.84	4908.13	4365.8	4317.25	5477.65	2379.4	2372.73	2940.95	2615.78	3173.21	7185.33	8599.89	7481.28	6245.28	6077.51
Mmp11	ENSMUSG00000000901	4	0.70899	1213.86	2193.42	1507.51	1360.55	2087.13	1834.31	1596.52	1342.36	1878.4	1572.83	607.724	534.4	1033.59	739.189	649.967	377.839	161.948	282.365	344.443	297.394	1243.94	2569.79	1535.73	1403.61	1779.84
Mpped1	ENSMUSG00000041708	4	0.437888	206.316	146.108	181.044	178.079	168.075	234.236	243.277	202.436	216.063	199.747	42.4144	118.117	44.875	75.0735	101.65	32.2222	46.0879	104.76	43.2343	69.0911	151.3	275.323	219.188	288.895	252.256
Nbl1	ENSMUSG00000041120	4	0.578963	2476.63	2441.57	3122.31	3027.85	2576.92	2112.89	2071.5	2072.69	2596.83	2552.81	882.893	933.509	942.657	946.312	1467.77	806.893	910.073	479.887	772.646	563.312	1631.61	1949.34	1625.58	1900.61	1735.86
Nit2	ENSMUSG00000022751	4	0.403834	730.641	1077.54	855.723	982.368	1056.32	1198.2	1017.88	893.477	1153.19	1171.97	655.317	837.117	650.632	628.667	887.93	913.085	688.975	567.945	723.354	682.822	961.024	1234.9	1073.09	996.384	1038.65
Ntm	ENSMUSG00000059974	4	0.553221	923.596	1069.65	760.589	708.722	776.309	555.984	557.771	834.757	762.977	704.964	418.832	505.264	454.832	571.421	403.044	390.692	448.188	496.73	615.392	549.624	758.451	717.78	681.223	802.324	610.996
Ntn3	ENSMUSG00000117406	4	0.53967	859.86	1208.71	1143.52	1291.9	1089.57	1040.62	892.123	523.106	765.629	1030.23	550.571	688.235	408.851	421.347	776.382	202.816	199.768	74.8761	110.23	65.1573	784.917	844.622	574.611	827.387	614.969
Pkdcc	ENSMUSG00000024247	4	0.536788	6229.69	6263.69	6165.69	7640.31	5190.22	3264.81	3135.71	3160.87	3285.17	3564.01	1786.57	1731.51	1742.17	1371	3261.46	939.466	1272.72	937.437	951.081	1349.06	4466.7	4916.08	5414.39	5295.78	4553.16
Podxl2	ENSMUSG00000033152	4	0.384161	1094.17	1205.47	1179.51	1072.3	1004.62	861.955	990.161	808.031	998.729	917.039	969.153	800.515	803.272	743.276	1077.16	542.166	715.312	624.28	537.617	596.512	1185.5	1183.95	1389.85	1216.92	1145.48
Rfng	ENSMUSG00000025158	4	0.309563	382.799	317.307	374.28	386.574	409.023	228.063	320.235	306.619	264.466	276.34	288.865	296.851	306.346	309.075	296.617	233.496	247.139	207.555	208.989	253.712	341.259	396.994	346.619	469.467	398.187
Scg2	ENSMUSG00000050711	4	0.379761	599.901	685.358	346.604	653.212	319.322	227.123	195.563	225.299	219.72	234.928	48.7579	41.2478	53.9712	44.3655	43.2259	40.7479	22.6842	20.2141	19.3947	27.8972	219.425	217.682	154.501	189.944	271.145
Sema3f	ENSMUSG00000034684	4	0.274215	1453.32	999.976	1355.17	1528.58	1242.08	1278.57	1197.77	1465.93	1488.76	1780.32	1179	902.059	1063.73	957.315	1204.6	197.694	294.114	137.617	192.119	257.06	753.712	1075.06	941.684	923.006	962.828
Sema4c	ENSMUSG00000026121	4	0.248059	671.492	766.089	938.461	950.898	819.671	805.702	909.881	812.854	840.865	765.808	964.475	872.247	754.541	736.919	962.795	573.75	518.413	552.492	580.706	628.736	1045.87	834.792	943.952	1097.81	906.805
Slit2	ENSMUSG00000031558	4	0.204055	1760.25	838.509	1222.82	1535.94	1167.78	3743.56	3808.62	5576.25	4582.68	5549.43	1820.42	1773.87	1740.55	1318.51	1543.76	489.334	615.573	744.336	313.485	1046.68	4842.9	3000.58	4017.31	4237.81	4744.3
Spock3	ENSMUSG00000054162	4	0.277557	367.029	331.992	410.044	450.24	532.394	742.117	655.593	592.201	715.354	771.255	440.503	402.219	369.797	349.739	386.886	154.087	268.074	172.793	162.307	335.673	641.691	580.223	560.235	606.58	675.459
Spon1	ENSMUSG00000038156	4	0.326731	2220.46	1674.62	2208.3	2251.69	2304.84	1272.92	1321.78	1076.9	1201.52	1302.69	351.866	264.363	370.32	292.857	353.215	416.001	637.667	341.931	427.532	250.911	893.107	802.288	756.183	945.875	969.017
Sulf2	ENSMUSG00000006800	4	0.572855	13176.5	11896.3	11684.3	11831.2	9370.9	7732.64	7553.61	8289.53	7891.61	7492.86	3948.54	4341.83	5924.63	5574.47	4238.35	2104.27	2493.68	1550.58	2069.81	2153.68	8578.28	5607.61	7629.95	8441.99	6685.55
Vcam1	ENSMUSG00000027962	4	0.418721	11007.1	12754.6	13290.6	13340.9	14000.4	7165.05	8555.9	5640.2	9294.57	9730.52	1713.5	2131.7	2701.3	2958.53	2131.2	1829.87	2099.41	1914.59	1962.48	2025.25	5515.77	6972.57	5983.57	5613.07	6252.94
2610507B11Rik	ENSMUSG00000010277	5	0.64709	4394.7	4402.51	4507.29	5239.5	5137.02	3919.99	4481.78	3938.75	4323.79	4459.4	4847.53	4463.52	4685.52	4624.71	4361.88	5913.56	5141.88	4397.42	4204.3	4299.15	7332.59	6838.67	7638.14	9316.63	7960.34
Acan	ENSMUSG00000030607	5	0.658267	12.3815	1.6966	7.08315	17.0328	4.6724	2.76153	6.77357	10.3202	9.03186	3.65462	110.369	91.6803	103.491	95.2488	57.8185	102.862	63.0324	56.0067	39.6933	50.6525	680.168	315.708	583.329	829.927	419.655
Adam23	ENSMUSG00000025964	5	0.545105	420.855	322.701	430.36	461.598	423.505	772.259	552.234	641.286	548.011	565.029	950.366	964.395	795.978	1004.06	863.385	1526.98	1674.46	1823.78	1521.91	1267.43	6395.1	5577.98	7062.53	7948.61	6936.67
Adamts1	ENSMUSG00000022893	5	0.770669	2087.51	3244.01	2093.69	2551.04	1905.55	2459	2367.69	2303.88	2153.25	1854.05	4323.05	4315.13	4998.99	4304.36	4208.97	2905.73	2949.53	2513.13	2814.27	3201.66	14690.4	17052	17389.2	18763.8	16241.3
Adamts10	ENSMUSG00000024299	5	0.50727	2683.7	2872.56	2775.12	3266.73	2846.84	2701.95	2756.17	2907.45	2420.04	2751.99	3193.53	2942.35	3334.48	2449.68	2833.98	2003.84	2144.36	1585.42	1605.9	1787.13	3915.5	3922.91	4928.11	5712.61	4347.31
Adamts15	ENSMUSG00000033453	5	0.768263	1348.66	2308.33	1287.73	1631.93	1252.13	1236.47	1558.31	1320.29	1252.16	1102.48	884.733	490.879	606.362	754.976	464.48	1997.98	1627.19	1130.06	1655.39	983.181	8612.52	8440.51	9690.18	10455.1	8610.07
Adamts17	ENSMUSG00000058145	5	0.797062	826.585	1324.9	1363.55	1840.67	1032.67	2103.52	1983.58	1522.76	1805.61	1550.74	2592.34	2498.03	1912.37	1957.25	1912.2	810.859	831.563	493.514	970.805	1332.05	6053.75	4794.39	6134.23	7125.23	6385.78
Adamts3	ENSMUSG00000043635	5	0.793449	199.021	179.197	194.485	211.48	112.489	381.309	172.57	247.683	319.113	199.237	282.71	272.128	123.565	129.569	145.051	93.6268	152.142	80.7188	205.399	254.993	695.433	424.448	617.83	674.548	644.562
Aplp1	ENSMUSG00000006651	5	0.767755	109.459	276.199	79.6971	74.9646	63.9464	210.569	233.826	259.987	172.481	161.427	322.317	320.894	263.177	266.818	408.936	57.298	125.978	27.9341	72.153	56.2414	875.468	901.924	1113.54	1234.91	1042.03
BC028528	ENSMUSG00000038543	5	0.671791	358.991	466.347	387.289	379.008	474.925	461.443	394.3	422.485	399.592	453.623	367.632	413.276	510.284	472.497	501.67	379.649	347.281	362.33	402.464	432.922	497.485	758.76	529.223	436.003	690.416
Bmp1	ENSMUSG00000022098	5	0.472968	4050.96	4598.26	4146.55	4745.53	4371.93	3907.22	3805.46	3761.48	3724.72	3572.65	4951.54	5225.84	5015.26	4809.22	5224.33	3918.99	4736.09	3707.16	3653.49	3932.89	6070.46	6279.73	7599.25	7961.06	6551.32
Bmp7	ENSMUSG00000008999	5	0.87025	197.281	191.243	169	166.904	192.192	262.134	344.181	399.576	371.257	342.424	355.703	351.646	286.613	561.913	561.68	241.562	294.552	253.272	249.519	269.746	1968.2	1939.95	2111.97	2361.11	2008.49
Brinp3	ENSMUSG00000035131	5	0.801092	16.478	27.1347	17.5444	5.96929	18.8866	52.0864	33.0201	47.0041	71.8764	30.785	139.092	178.866	112.856	60.4791	134.055	46.6793	45.629	11.7819	46.8291	56.0037	381.233	1063.21	698.454	546.527	601.503
C1qtnf4	ENSMUSG00000040794	5	0.669575	70.2964	71.5142	68.2435	70.3035	48.7683	99.7737	66.4505	74.5739	112.658	80.105	15.9365	12.0174	32.7091	33.6663	31.2842	22.4939	27.7577	21.2015	26.4447	25.0799	208.202	318.532	248.42	259.473	232.125
Ccbe1	ENSMUSG00000046318	5	0.570979	185.916	100.835	159.445	152.973	209.93	330.156	315.746	270.011	370.956	291.626	187.351	179.127	393.152	311.462	217.451	72.6377	82.4513	29.2163	70.3511	109.723	566.287	379.226	802.728	921.178	693.428
Ccl27a	ENSMUSG00000073888	5	0.627578	134.981	171.273	187.975	254.961	197.577	167.191	213.176	254.283	218.022	244.189	123.23	146.604	171.057	168.805	163.274	155.593	131.001	106.74	154.342	104.502	327.81	538.281	426.127	325.927	308.21
Cdh11	ENSMUSG00000031673	5	0.2078	11572.7	15846.5	10021.6	15693.5	10757.2	13849.1	14078.2	12459.5	13192.6	13731.8	21897.8	27532.5	21345.9	20724.8	31120.4	6884.76	7672.02	5550.13	6457.93	6956.84	26537.4	21851.2	22494.4	25889.9	24913.4
Cers1	ENSMUSG00000087408	5	0.854618	97.5007	85.8229	98.7047	94.1696	115.344	118.725	132.868	120.325	119.407	109.691	100.152	141.777	132.831	131.473	126.463	107.298	117.081	73.074	78.0715	58.7201	248.032	229.337	313.116	380.245	266.102
Chgb	ENSMUSG00000027350	5	0.889531	17.0416	8.17305	13.1834	5.08218	4.68926	1.1086	4.74647	11.4729	10.8773	8.80274	9.10656	9.61391	2.42289	11.6091	3.0275	4.49878	0	7.95056	12.2052	12.54	251.614	267.491	296.377	215.931	273.968
Chrd	ENSMUSG00000006958	5	0.715996	128.058	226.58	207.232	166.953	182.049	311.448	251.779	304.266	240.168	222.008	178.139	173.213	208.915	259.885	181.84	192.33	310.386	114.506	199.309	103.957	440.317	536.696	586.712	491.12	474.846
Chsy1	ENSMUSG00000032640	5	0.469083	3739.56	3926.13	3319.12	3580.39	3366.89	3605.16	2972.24	3290.81	3434.13	3571.27	2874.26	2730.35	2718.49	2699.11	2790.35	3232.37	3642.21	4159.47	3509.01	4633.51	5345.91	6956.66	5786.55	5971.43	6266.39
Clcf1	ENSMUSG00000040663	5	0.638728	119.744	112.987	146.038	126.481	102.884	197.128	195.762	218.557	166.075	197.928	132.823	182.211	185.869	192.614	164.805	58.9585	62.3954	93.4458	62.3156	89.8513	397.687	539.769	413.596	373.643	368.887
Col4a6	ENSMUSG00000031273	5	0.413031	119.039	154.934	173.321	141.256	134.688	106.614	131.859	88.6708	115.379	122.1	231.577	192.497	165.796	163.768	170.595	134.371	143.437	203.258	103.458	211.742	266.239	400.086	415.202	344.275	230.311
Cxcl13	ENSMUSG00000023078	5	0.763123	11.7161	18.3894	10.0814	11.0114	6.56496	101.991	61.704	79.3543	48.948	29.9293	147.982	176.656	214.426	161.366	192.751	83.2273	94.1779	31.8022	112.898	52.2498	673.333	1513.26	854.602	727.768	1074.95
Dlg1	ENSMUSG00000022770	5	0.41068	4115.83	4235.24	3445.28	4165.19	4371.88	3544.72	3638.55	3855.8	3523.55	3727.48	3209.33	2456.72	3149.51	2844.94	2657.05	2123.95	3150.68	2717.55	2169.29	2903.32	5903.73	4495.78	6065.68	5850.84	5821.66
Dnajb9	ENSMUSG00000014905	5	0.610076	717.222	695.373	567.773	720.118	585.665	589.272	639.026	593.121	705.48	727.311	636.52	718.953	690.734	615.996	782.204	628.507	550.388	589.618	504.697	499.948	1089.5	1087.84	930.452	690.128	772.3
Edil3	ENSMUSG00000034488	5	0.339753	240.939	417.154	208.354	200.851	218.082	218.906	255.268	260.655	210.339	176.28	555.472	582.057	529.75	559.619	423.736	179.555	258.794	149.968	155.561	292.64	742.66	626.871	744.133	750.25	864.936
Efnb1	ENSMUSG00000031217	5	0.3287	2199.2	2458.17	2026.67	2115.29	1998.04	2130.37	2028.77	2113.26	2146.61	2163.89	1602.94	1562.13	1609.76	1713.29	1600.96	1201.78	1577.66	1775.34	1835.06	2081.65	2423.8	2984.88	2647.24	2694.7	2662.89
Efnb2	ENSMUSG00000001300	5	0.909131	1583.57	2049.78	1419.22	1915.97	981.54	1060.9	1598.08	2405.63	1690.38	1023.37	2028.72	2315.55	1757.05	1357.3	2918.82	714.049	932.426	645.705	470.382	542.731	9707.54	6425.12	8939.02	10367.8	7032.54
Epcam	ENSMUSG00000045394	5	0.706021	18.001	19.2381	36.0945	23.4699	25.9343	31.2441	79.5282	62.1226	43.564	40.0619	330.89	79.5698	24.6293	112.214	94.6534	37.8756	6.7018	20.0205	20.6849	14.9387	376.92	515.493	403.934	562.193	360.359
Epyc	ENSMUSG00000019936	5	0.707241	6.2609	9.59065	0	2.84517	2.36268	8.67785	3.18867	7.22577	11.6929	3.69605	18.1622	18.8139	16.277	28.2712	17.1157	22.3993	20.812	18.9167	53.8834	31.5912	218.832	261.061	232.514	182.315	313.91
Fbrs	ENSMUSG00000042423	5	0.621448	760.807	384.601	452.233	624.427	544.902	460.425	327.246	608.942	378.053	317.147	401.844	342.592	437.263	492.135	694.202	371.878	534.496	437.766	327.017	494.842	714.547	775.798	963.139	1018.76	877.695
Fgf12	ENSMUSG00000022523	5	0.334902	89.4202	73.3923	486.028	89.1418	50.3466	56.0559	39.5141	54.8242	41.0499	57.7782	38.8763	12.7498	22.7368	10.713	12.0484	92.4719	74.5904	35.2413	27.6371	64.7984	173.625	240.883	221.118	267.882	317.389
Flrt2	ENSMUSG00000047414	5	0.879671	4823.65	4842.68	4724.87	4999.03	4314.95	5111.09	5364.15	5544.54	4547.37	4964.61	5957.67	6230.21	5209.41	4971.2	5551.62	2952.78	4258.06	4199.77	3220.52	5606.23	11308.5	11823.8	11268.9	10742.9	12598.3
Fndc5	ENSMUSG00000001334	5	0.173187	1261.08	1197.35	1025.98	1002.04	739.027	1169.57	951.192	1227.6	1072.19	977.985	696.652	665.764	728.08	774.325	707.427	1233.79	1592.1	1012.37	1273.41	681.338	1126.06	1434.81	1142.35	1208.5	1107.83
Fstl5	ENSMUSG00000034098	5	0.917009	43.6698	10.6878	32.0263	33.3856	20.6304	23.0551	24.1293	22.3933	15.6008	18.938	52.8568	5.17079	16.3017	25.4156	19.1698	9.18938	4.97644	32.1213	15.1262	11.0726	374.69	314.72	346.697	358.721	378.08
Gdf11	ENSMUSG00000025352	5	0.77919	927.7	952.16	863.901	758.939	858.134	773.8	859.11	769.641	731.112	790.486	704.62	713.833	604.512	594.384	644.858	489.242	550.197	647.971	620.433	726.272	1597.39	2380.01	1921.18	1701.68	1838.07
Gja1	ENSMUSG00000050953	5	0.174857	1862.15	2622.43	1938.18	2593.39	2007.02	706.203	1016.17	1118.51	1095.84	955.994	1816.49	1670.24	1884.91	1610.8	1727.71	1879.37	2146.61	1381.56	1287.8	1006.43	2430.53	1903.23	1853.01	2178.41	2395.38
Glg1	ENSMUSG00000003316	5	0.678633	4332.07	4819.52	4222.01	6024.45	4918.48	4373.71	4666.5	3648.44	4463.04	4196.7	5233.7	5036.96	5242.7	4248.66	5972.29	4107.67	5901.7	4227.14	3955.95	4069.2	7599.97	6219.19	7663.24	9498.3	8392.11
Gpc6	ENSMUSG00000058571	5	0.897871	1070.58	1229.89	804.45	1434.35	866.76	1287.05	1258.63	1066.63	1306.57	1203.3	1324.28	1171.64	1111.04	1187.94	1667.71	1086.94	1645.44	1166.83	978.287	1017.64	5203.08	4114.77	5841.02	6388.17	5493.88
Igfbp3	ENSMUSG00000020427	5	0.223241	3630.87	2712.53	3322.46	3041.85	3459.25	7535.41	7144.31	8081.21	7116.46	7482.14	4731.27	5116.72	5236.28	4274.91	6116.56	3140.4	4130.03	3869.13	2986.26	5177.3	7599.09	5618.57	7853.79	8498.14	8363.76
Izumo4	ENSMUSG00000055862	5	0.425062	136.686	190.166	223.808	183.622	188.71	185.2	190.878	152.33	179.25	125.058	136.933	257.873	228.989	253.267	171.802	155.11	127.848	124.68	106.294	165.355	233.375	325.454	351.475	271.798	182.426
L1cam	ENSMUSG00000031391	5	0.925399	227.656	55.5913	171.678	122.283	134.601	194.007	168.366	137.314	230.209	250.572	264.129	137.405	163.153	108.383	165.419	103.039	174.823	186.169	97.6426	89.31	555.969	618.255	800.979	613.84	760.127
Lama1	ENSMUSG00000032796	5	0.697312	392.876	337.346	300.735	391.894	355.594	592.723	698.906	380.858	557.852	610.512	209.792	72.6732	55.8173	120.349	44.5599	51.8202	75.1754	85.2206	66.3892	106.676	2502.48	1529.69	1737.33	2181.37	1581.92
Lamb1	ENSMUSG00000002900	5	0.695881	9197.65	10201.7	9518.4	9687.98	9531.9	8303.84	11161.8	9862.72	10024.1	9182.22	9661.9	10309.2	9524.72	8795.38	10324.8	11742.3	14092	12928.9	11631.7	11005.7	35416.8	31372.2	36382.9	40375.6	33201.9
Lime1	ENSMUSG00000090077	5	0.596455	80.0627	183.234	149.333	196.276	147.372	202.717	163.591	147.474	174.655	117.342	151.971	212.556	155.547	110.4	99.3553	167.414	137.802	59.4118	93.7268	164.692	171.401	147.65	295.509	302.295	174.969
Masp1	ENSMUSG00000022887	5	0.358663	134.248	215.149	102.219	117.516	84.2675	38.4611	29.9096	43.8372	17.7072	30.5814	646.52	574.49	396.47	389.116	672.65	109.638	101.123	154.853	111.348	219.014	964.577	1056.66	1072.15	1082.18	984.676
Mmp16	ENSMUSG00000028226	5	0.45898	1654.05	1469.42	1468.55	1493.09	1380.1	1193.52	1806.76	1220.23	1350.36	1330.91	2620.15	3289.99	2390.62	2082.66	2824.13	1030.99	1035.15	851.077	1052.39	1352.39	4251.71	4745.42	4639.29	3696.66	4424.89
Mtmr4	ENSMUSG00000018401	5	0.395896	1908.11	2360.49	2410.26	2433.07	2584.64	2054.69	2487.78	1637.75	2400.6	2051.91	1811.15	2052.68	1508.68	1553.23	1728.02	1874.03	1871.14	1470.95	1723.81	1526.29	2981.23	2755.19	2924.09	3243.97	3216.16
Ncan	ENSMUSG00000002341	5	0.900453	43.669	27.584	24.8158	19.4817	29.0734	21.0633	16.138	28.6823	25.6394	29.0491	19.3514	21.6313	23.0175	32.5054	11.1008	3.37408	15.8615	39.7528	18.3079	24.0349	268.447	199.437	269.521	281.688	323.78
Negr1	ENSMUSG00000040037	5	0.691828	456.776	332.639	243.189	111.707	177.201	562.74	329.889	480.611	216.662	461.925	709.419	932.206	716.148	467.521	802.676	183.489	214.355	246.623	312.635	367.873	2231.77	1601.04	2216.85	2104.48	2054.49
Nlgn2	ENSMUSG00000051790	5	0.278246	1312.49	1450.47	1585.62	1916.78	1344.36	2004.98	1444.08	1352.29	1504.17	1254.95	1483.49	1210.38	1521.39	896.399	2069.2	682.014	642.65	462.392	495.406	697.234	1988.79	1691.03	2137.94	3069.19	2084.55
Nrg1	ENSMUSG00000062991	5	0.177361	408.664	251.199	387.038	342.756	225.349	447.69	345.068	597.239	336.406	455.292	711.005	1005.47	600.421	340.101	912.22	70.3795	119.75	66.7566	101.587	218.99	486.614	653.897	780.269	592.389	748.984
Olfm3	ENSMUSG00000027965	5	0.890673	7.79252	1.661	7.56495	3.44282	26.5592	54.7557	8.21617	3.90089	8.84237	17.4828	8.32823	6.53764	1.96961	13.4204	3.28148	2.74285	20.1327	9.69472	11.2034	11.6722	512.673	548.683	583.896	742.227	796.114
P3h2	ENSMUSG00000038168	5	0.588991	537.058	480.421	542.254	545.312	646.218	800.645	837.349	733.537	675.321	592.409	463.459	626.481	536.69	419.588	698.703	523.047	773.962	549.131	468.138	387.935	911.141	1004.55	1264.71	1086.93	1111.55
Pappa	ENSMUSG00000028370	5	0.882672	308.878	317.727	291.586	280.367	218.519	518.823	575.272	638.658	468.502	363.553	1173.61	1192.13	1106.05	787.095	1412.83	204.694	210.165	86.1311	225.797	146.299	5671.06	6354.57	6668.01	7363.87	6860.15
Plac1	ENSMUSG00000061082	5	0.91577	129.006	106.872	136.019	104.019	102.709	164.469	104.874	121.217	103.609	107.376	140.763	64.6177	94.2666	92.5643	119.304	62.6658	87.7211	116.255	89.2884	100.86	280.015	495.733	363.52	215.118	381.863
Plscr1	ENSMUSG00000032369	5	0.819254	106.348	205.966	122.782	192.397	168.64	196.886	164.614	111.388	220.458	183.851	149.612	182.728	176.789	188.67	120.391	219.03	183.647	162.067	167.993	117.544	332.133	341.153	349.39	249.537	327.042
Prss36	ENSMUSG00000070371	5	0.879059	42.7807	30.8084	37.4324	260.596	32.7642	48.8076	39.4058	137.241	44.9023	52.0851	50.2031	42.0432	46.954	48.65	44.347	58.76	51.4608	55.0098	66.1594	49.8451	48.0381	72.7109	709.193	1795.27	885.888
Rgma	ENSMUSG00000070509	5	0.550876	618.465	460.097	623.888	616.866	544.595	459.52	450.028	514.993	608.758	493.232	353.94	398.708	392.995	403.193	467.846	265.357	424.818	285.799	279.026	240.334	950.902	772.436	1006.35	1265.91	982.898
Rgmb	ENSMUSG00000048027	5	0.336052	1290.7	1219.42	1314.55	1481.18	1071.58	1561.07	1346.57	1377.94	1923.97	1577.37	952.609	610.757	933.33	419.06	660.106	1074.57	1194.51	544.987	631.163	597.051	2442.67	1693.53	2242.64	2586.09	1901.63
Scg3	ENSMUSG00000032181	5	0.818284	6.6998	5.72805	7.73338	3.33005	2.94969	0.871677	2.23926	3.35031	6.03033	6.83225	13.4257	33.072	24.3158	14.6049	26.9843	24.92	21.8256	28.1315	29.359	21.6114	461.677	303.766	402.394	402.874	492.216
Scube1	ENSMUSG00000016763	5	0.81007	1199.79	1236.78	1102.88	1263.73	872.618	1294.95	1474.13	2094.49	1186.04	1111.22	214.555	206.171	242.503	385.558	389.61	61.9524	158.833	215.285	113.743	215.982	6746.54	6547.94	8017.5	8967.43	6171.43
Sema4g	ENSMUSG00000025207	5	0.833236	183.983	217.706	215.346	245.193	167.945	167.382	229.318	255.213	171.751	111.862	103.831	111.161	70.6374	96.3675	125.884	61.2419	121.788	91.8361	112.408	111.24	785.863	689.451	963.647	1225.76	744.112
Serac1	ENSMUSG00000015659	5	0.817367	159.367	261.516	209.83	319.36	216.624	263.714	276.575	226.028	214.372	213.327	210.504	182.007	179.57	170.428	229.479	220.278	201.76	253.677	234.645	220.394	637.693	474.007	636.948	754.495	736.988
Serpine2	ENSMUSG00000026249	5	0.607566	1358.56	1615.82	830.423	1141.5	857.934	999.988	1036.62	1429.53	1230.8	1177.03	1618.72	1394.91	927.868	973.332	1412.8	1928.59	2179.43	1620.58	1762.04	1490.41	5261.24	5419.87	5175.25	6358.29	5554.29
Serpini1	ENSMUSG00000027834	5	0.808927	90.2765	146.99	170.303	153.607	182.983	401.275	347.525	270.5	286.619	261.41	142.043	152.183	227.845	152.058	171.911	101.01	107.645	158.774	121.235	200.064	898.161	1484.02	942.096	743.633	1169.83
Sfrp1	ENSMUSG00000031548	5	0.415246	4947.38	8500.99	2770.07	4211.43	3147.43	2883.46	3544.66	3809.96	3173.85	3107.37	661.364	718.64	626.318	724.406	570.18	1558.83	1473.14	1241.61	1522.6	1559.13	9054.56	8860.29	9480.23	9899.95	8485.03
Sfrp2	ENSMUSG00000027996	5	0.643027	2396.83	5366.5	1934.5	2253.09	1618.96	1375.49	1302.7	1790.86	1415.27	1405.81	1125.27	1072.26	1342.78	1437.94	1209.15	799.144	1211.04	631.872	725.397	934.199	6569.16	5937.58	6321.5	7302.01	7592
Slit3	ENSMUSG00000056427	5	0.238919	991.115	906.246	772.366	1085.15	745.512	1010.24	977.548	728.452	802.08	813.261	1452.01	1518.7	1142.76	1408.53	1437.61	424.139	697.213	289.324	231.599	383.198	1519.93	1078.8	1526.71	1859.78	1643.64
Spock1	ENSMUSG00000056222	5	0.850126	37.4142	31.7441	21.981	43.0956	39.0485	9.89635	4.7694	16.9583	10.6925	4.49993	3.36746	6.61159	3.81424	33.135	6.67713	9.03429	5.10715	13.5102	14.904	22.9282	349.904	228.137	311.846	366.84	386.59
Sptbn2	ENSMUSG00000067889	5	0.606095	33.3946	44.5235	36.742	44.5864	29.405	56.3859	79.3699	74.6079	50.8858	69.6428	104.412	69.847	56.2925	105.31	160.838	33.6959	8.97931	40.2067	48.9672	17.4743	571.668	108.004	141.008	171.22	156.561
Tfip11	ENSMUSG00000029345	5	0.403255	355.904	538.464	364.931	639.122	492.671	397.625	524.359	380.447	488.527	426.645	263.782	613.033	433.488	234.139	487.389	504.437	671.716	432.698	456.003	459.363	865.595	500.59	633.482	790.196	535.216
Tgfb2	ENSMUSG00000039239	5	0.413922	1133.87	1365.45	541.82	867.538	840.684	1037.68	525.844	815.084	720.509	758.065	932.339	1683.85	1035.12	1059.17	973.483	483.458	755.88	858.461	635.703	855.244	1887.56	739.535	1363.07	1990.09	1653.15
Tnr	ENSMUSG00000015829	5	0.598988	52.7364	0.473369	5.74917	1.12363	37.942	30.9216	5.27822	34.9898	3.95998	5.34125	32.5784	10.5796	63.4621	117.743	10.7547	6.7746	93.1244	22.4899	13.9999	78.0901	243.356	128.537	186.011	239.988	287.696
Vip	ENSMUSG00000019772	5	0.884649	11.894	0.739713	4.80889	1.09301	1.35811	1.43054	1.37467	0	4.25538	1.77328	2.4726	0	6.25303	1.68111	0	0	0.717785	7.0486	11.9727	8.17453	862.815	1056.98	880.36	812.77	1387.67
Wnt2b	ENSMUSG00000027840	5	0.326632	488.506	505.515	485.244	619.124	474.866	456.673	421.113	394.675	440.407	414.667	320.184	314.692	270.126	306.985	335.043	164.181	236.83	175.387	165.371	171.545	679.839	645.462	758.777	968.982	693.507
Adam10	ENSMUSG00000054693	6	0.600595	2670.39	2075.14	1656.01	2883.84	1781.21	2219.17	2083	3119.49	1816.21	1920.97	2855.18	2772.54	2434.85	2010.62	3504.55	2726.96	3860.46	2651.62	2043.34	2377.76	4528.75	3474.18	3800.67	4926.44	5294.69
Adam11	ENSMUSG00000020926	6	0.401362	55.061	121.348	126.227	164.228	89.3359	75.8243	60.0513	50.6769	65.1382	78.6364	108.163	164.371	131.77	67.2836	136.186	398.207	221.241	62.3563	176.335	153.909	178.948	246.233	238.506	288.589	181.996
Adamts14	ENSMUSG00000059901	6	0.221432	413.005	288.471	331.127	367.841	308.182	296.178	265.257	240.801	258.367	224.308	967.444	929.576	934.03	1116.69	973.625	672.767	898.279	704.776	694.091	581.225	830.899	723.485	879.804	1152.87	725.754
Adamts19	ENSMUSG00000053441	6	0.662612	201.275	245.866	213.49	227.974	213.107	1517.74	1361.79	1312.78	988.815	1124.61	2288.67	2026.79	2133.77	1857.85	1946.92	1633.02	2206.02	2200.79	1769.06	3913.67	3277.19	3595.23	4645.5	3892.65	4084.79
Adamts5	ENSMUSG00000022894	6	0.468128	168.285	115.444	127.957	112.655	136.926	536.561	443.32	509.588	323.212	297.533	1605.03	1470.93	1490.08	1389.61	1405.77	1805.13	2212.68	1458.93	1540.91	1533.01	1951.78	2211.77	1949.95	2142.43	2519.51
Bche	ENSMUSG00000027792	6	0.652762	294.656	375.317	245.925	399.686	304.917	651.914	452.784	632.813	540.851	574.949	703.114	702.127	713.172	542.47	611.826	805.47	804.495	943.541	700.137	702.947	1151.62	1270.04	1010.49	1090.17	1142.58
Ccl11	ENSMUSG00000020676	6	0.747672	33.018	41.8869	15.5099	18.6347	20.6327	69.8416	55.059	139.587	50.5019	44.0137	192.376	201.892	212.003	175.297	87.7976	365.525	322.187	393.553	324.456	326.039	528.035	1319.5	761.564	607.806	884.666
Ccl25	ENSMUSG00000023235	6	0.463632	251.09	237.587	168.219	241.782	195.446	129.042	200.84	185.021	192.424	273.399	334.279	217.499	217.341	199.534	246.007	201.477	277.917	211.82	238.575	211.024	292.729	241.119	309.622	381.648	310.109
Cd47	ENSMUSG00000055447	6	0.605935	481.094	615.614	519.079	829.169	545.785	816.006	534.052	470.013	722.528	767.547	1172.17	1193.9	1353.58	1261.65	1636.64	1670.8	1963.25	1376.24	1095.94	1580.01	1989.84	1547.12	1687.69	2261.77	2437.38
Chrdl1	ENSMUSG00000031283	6	0.28878	76.0896	84.7173	67.0156	76.8961	97.4284	70.4059	89.6848	142.131	88.9278	97.0075	865.268	874.206	520.889	989.739	548.528	2698.87	2740.14	2706.13	2195.51	1608.34	1621.01	2488.36	2121.62	1759.96	2144.4
Clu	ENSMUSG00000022037	6	0.16965	116.163	131.722	117.197	66.6396	79.9907	408.14	291.19	390.195	416.064	232.295	231.868	309.117	252.809	218.073	232.464	183.842	344.845	257.905	316.239	350.739	430.815	352.075	179.494	305.168	279.133
Ctsf	ENSMUSG00000083282	6	0.473102	317.552	367.098	369.734	362.011	319.449	530.308	433.004	386.512	394.722	378.695	624.873	572.661	639.873	635.381	599.871	423.395	516.589	459.996	481.93	507.253	717.018	732.533	814.568	883.71	768.506
Cxcl12	ENSMUSG00000061353	6	0.885366	451.763	403.927	545.092	521.431	469.485	853.797	1207.52	1257.07	1271.84	1025.15	2534.14	2867.24	2611.43	2524.22	2454.72	2579.45	3768.72	3369.62	2353.4	3266.04	6062.29	6312.62	6532.41	6995.42	7369.85
Dlk1	ENSMUSG00000040856	6	0.304937	9431.35	6712.52	7832.92	9418.03	5418.09	7644.68	6323.84	9076.26	7633.6	5719.49	12341.7	10925.1	12264.3	11824.4	13157.5	15243.7	25888.1	15211.1	12817.5	14717.2	14372.7	13089.2	14974.5	21559	15169.2
Dst	ENSMUSG00000026131	6	0.782838	4188.66	4465.45	3759.1	4299.08	3177.25	4204.77	4820.46	3898.09	4218.95	3397.93	10721.4	9751.31	8533.92	9740.02	8268.9	9041.36	10984.1	7361.17	8353.61	8424.16	19427	16806.6	19160.2	19372.9	18915.1
Dusp18	ENSMUSG00000047205	6	0.457097	117.16	174.377	138.649	132.01	146.555	81.9471	152.272	158.836	120.618	101.478	119.204	127.961	140.056	118.505	142.1	213.975	185.435	232.813	171.019	263.983	386.495	342.933	346.253	411.099	439.657
Eda	ENSMUSG00000059327	6	0.724724	299.212	229.405	251.105	205.514	291.043	353.288	295.531	358.09	303.896	266.87	307.349	405.694	356.666	406.319	439.914	559.685	732.452	482.443	607.62	353.639	626.355	821.603	698.998	850.124	897.703
F8	ENSMUSG00000031196	6	0.614776	137.37	160.133	173.072	194.01	179.91	145.975	236.56	132.896	188.973	244.128	255.985	213.324	210.028	145.863	286.81	355.439	354.697	477.712	370.887	360.608	426.368	437.884	533.045	767.197	533.747
Fgf10	ENSMUSG00000021732	6	0.615376	134.731	71.0733	77.688	91.9254	72.2044	212.86	249.194	226.143	207.715	209.193	936.433	933.011	835.956	696.946	855.989	1181.99	1703.3	1503.15	1182.22	1753.25	4571.06	4239.12	4975.15	5721.42	4859.59
Fn1	ENSMUSG00000026193	6	0.867283	10283.5	9604.63	10201	15593.2	8312.35	12244.6	13359.2	11432.4	9691.24	7573.15	23185.4	18231.3	19871.9	17308.3	24434.7	22849.6	34280.4	19264.2	15007.8	22250.6	42666	31618.4	42860	49120.1	40761.5
Fuca2	ENSMUSG00000019810	6	0.577727	339.898	278.308	277.508	331.629	227.522	429.196	539.94	344.202	383.951	291.395	518.322	615.758	513.144	616.273	459.581	779.718	787.287	747.985	705.985	1072.92	881.985	1154.95	852.752	947.798	1157.88
Gnas	ENSMUSG00000027523	6	0.511995	34562.9	34466.6	32426.1	33335.4	30732.5	32236.9	32962.7	34533.6	35493.2	33389.5	35557.9	39686.8	44550.8	40396.6	42906.7	52929.7	62117.3	48919.6	44476.6	47039.8	53622.5	52937.3	53638.9	61798.8	55404.6
Gnptg	ENSMUSG00000035521	6	0.619468	205.699	219.762	195.847	186.514	170.538	242.475	223.969	258.777	238.614	249.259	322.896	283.308	321.47	354.316	339.633	320.308	314.107	315.314	319.387	299.962	388.942	440.71	468.426	394.749	362.252
Gpc3	ENSMUSG00000055653	6	0.7256	7206.9	12080.7	4998.03	7076.37	5108.44	8274.74	9660.72	9104.65	8557.6	8629.36	11457.5	12199.1	13162.4	10087.2	12232.3	12057.3	15372.3	10526	9610.93	9207.28	20584.1	19822.9	18851	21076.2	19889.8
Hsd17b11	ENSMUSG00000029311	6	0.326395	155.711	138.397	103.613	127.912	98.1635	176.221	169.714	166.011	139.735	155.487	385.904	350.545	305.38	272.465	363.303	590.846	708.009	546.272	504.832	584.554	572.379	467.355	540.386	657.777	513.616
Hspa1b	ENSMUSG00000090877	6	0.283345	88.4031	65.3844	98.4878	60.1391	71.2767	100.882	145.242	84.1346	156.944	80.9852	221.972	206.699	203.523	199.676	161.467	141.711	115.987	83.4809	104.762	75.2397	194.026	217.396	187.993	278.133	220.17
Idua	ENSMUSG00000033540	6	0.406463	158.283	170.85	226.988	340.74	303.96	170.638	154.858	200.7	284.511	219.43	268.802	181.582	176.75	182.414	248.565	259.344	231.311	267.817	332.944	336.402	337.527	307.202	326.607	569.312	293.123
Igf1	ENSMUSG00000020053	6	0.808248	2239.9	4298.05	1644.3	1535.83	1184.15	4398.86	4386.53	6049.02	3941.06	3698.74	9125.55	10658.1	8521.85	7877.76	12998.1	11255.1	11233.7	7564.99	10409.2	6807.84	23350.1	20829.6	21995.3	21142.3	20787.7
Igf2	ENSMUSG00000048583	6	0.641443	42378.4	41282.8	40631.6	53015.2	31437.2	38963.4	37366.4	39836.3	40897.7	35448.8	40580.6	40452	40546	46791.9	52370	50536.3	67306.1	46481.4	46397	44458.4	58059.1	52579.8	58580.2	81254.5	63262.3
Islr	ENSMUSG00000037206	6	0.727189	2869.76	2589.46	2665	2338.46	2182.35	2963.56	2744.62	3129.96	2770.7	2336.72	3319.37	3320.43	3894	4123.52	3484.92	5210.66	5163.82	4904.52	4865.55	4617.93	5633.11	7873.04	6657.1	7075.24	6181.07
Lama2	ENSMUSG00000019899	6	0.553885	1241.68	1039.37	1118.04	1487.59	1344.28	1002.68	1273.16	1390.68	1514.97	1341.46	3325.53	2534.07	2662.96	2485.02	2402.05	3784.03	4751.64	2898.4	3156.64	2346.66	4335.1	3716.05	4140.69	4086.02	4392.75
Lgi1	ENSMUSG00000067242	6	0.820958	19.6987	44.3014	23.9953	24.2013	20.1494	65.5047	36.0007	28.4809	34.6007	15.155	142.139	161.262	185.429	204.792	92.4471	216.608	264.207	210.527	289.089	336.366	533.017	579.423	679.472	673.481	548.502
Lgi2	ENSMUSG00000039252	6	0.576562	40.4877	43.9453	40.11	38.9768	65.6723	168.565	112.055	182.673	158.443	98.6247	220.777	245.239	222.983	260.133	237.236	576.042	779.36	528.895	759.021	462.048	718.625	711.597	864.909	1064.03	1015.4
Ltbp3	ENSMUSG00000024940	6	0.246901	566.818	849.626	625.475	1162.63	682.951	509.402	473.744	524.088	580.481	465.243	1902.42	1242.1	1395.88	1467.9	1537.96	1092.59	1697.39	639.088	1088.62	1286.45	1124.73	1120.95	1290.11	2372.72	1270.04
Nid2	ENSMUSG00000021806	6	0.700654	2687.49	3786.6	2543.73	2688.23	2518.64	4884.1	4689.47	5283.49	3780.59	3021.5	5939.36	5016.59	5216.53	5326.93	5692.64	8205.14	12850.5	9856.64	7406.33	8376.92	16067.2	16153.7	16648.3	21423.9	18594.1
Pdgfd	ENSMUSG00000032006	6	0.572186	154.426	149.123	137.88	112.698	116.273	489.208	352.849	459.784	332.059	337.1	599.936	695.807	626.814	743.511	574.851	441.152	496.817	473.797	528.312	622.655	1266.43	1676.14	1350.38	1247.75	1517.77
Plat	ENSMUSG00000031538	6	0.528424	830.515	1007.04	668.313	718.751	738.873	1566.83	1403.65	1611.9	1311.92	1239.72	2062.36	1991.21	2003.46	2129.16	1772.48	2258.53	2527.35	2414.11	2360.98	3018.11	2851.51	3349.14	3013.33	2792.72	3256.4
Prss12	ENSMUSG00000027978	6	0.230267	197.043	195.131	190.772	202.44	174.44	310.407	200.301	287.779	285.918	343.307	228.802	251.164	279.844	278.618	245.228	428.508	430.244	368.376	445.491	604.008	439.439	527.421	390.374	188.384	437.352
Pthlh	ENSMUSG00000048776	6	0.664185	0	3.49356	5.30375	0	0	32.9876	45.9647	34.8863	5.40006	14.3271	184.157	122.855	43.2628	134.92	49.0982	56.7414	71.6479	62.8248	91.8518	141.172	262.757	327.042	381.531	297.036	261.278
Qdpr	ENSMUSG00000015806	6	0.403188	316.487	348.427	418.201	407.64	434.689	382.753	379.11	383.324	405.958	412.028	387.865	450.642	423.714	392.312	475.003	806.958	863.584	672.391	639.126	556.89	798.748	809.067	620.841	738.875	803.368
Sema3d	ENSMUSG00000040254	6	0.817283	458.499	563.735	251.451	471.383	237.787	408.231	442.592	391.248	429.82	430.597	910.655	848.676	964.223	1342.79	976.652	1092.95	1347.96	1182.7	812.275	1119.52	1521.48	2611.91	1547.61	1533.35	2146.53
Sema6a	ENSMUSG00000019647	6	0.421621	702.71	793.938	612.48	561.658	782.552	1204.55	1719.78	1271.69	1329.59	1077.54	2081.64	1782.48	1633.4	1354.89	2316.77	913.972	1864.18	1263.5	952.752	1373.77	2897.38	2235.83	3130.47	2896.68	2636.41
Smpdl3a	ENSMUSG00000019872	6	0.338242	253.087	252.79	184.272	219.568	205.355	319.599	205.064	201.835	257.856	279.181	412.436	387.035	428.226	408.081	424.105	358.908	303.701	320.072	361.896	347.841	353.19	543.666	414.386	360.35	462.694
Smpdl3b	ENSMUSG00000028885	6	0.530137	108.64	123.617	70.57	71.9975	64.7118	68.733	62.6533	63.101	41.9554	39.6123	93.3422	96.1391	98.1272	100.999	68.6234	102.347	106.074	177.562	170.873	184.964	212.632	202.273	214.849	232.815	186.298
Sned1	ENSMUSG00000047793	6	0.613733	80.7433	149.713	46.8877	117.226	111.597	637.153	558.154	441.061	340.207	215.304	2975.91	1952.65	1743.39	1221.93	2068.75	1518.69	1676.33	1859.53	1419.24	2679.38	4830.41	5233.42	8025.17	9886.28	7711.27
St3gal1	ENSMUSG00000013846	6	0.182325	419.953	775.657	689.466	647.629	674.466	464.216	330.101	372.946	303.925	274.548	1707.51	1311.86	1112.24	1253.21	1367.14	963.766	1337.54	1103.34	1000.27	1072.37	1004.68	1161.61	1100.34	1346.38	1086
Tctn1	ENSMUSG00000038593	6	0.43909	379.191	480.367	498.126	451.258	389.375	529.054	470.103	497.932	438.553	417.699	709.711	660.65	625.706	701.37	657.072	431.031	582.088	511.994	456.126	605.824	734.731	800.522	1038.36	1044.32	833.748
Tgs1	ENSMUSG00000028233	6	0.433879	851.041	1000.71	910.283	1306.96	953.235	1042.89	1248.22	976.344	967.684	979.443	972.064	1193.43	926.911	774.779	1391.39	1360.01	1798.14	1254.99	771.467	947.628	2202.2	1156.02	2168.09	2027.95	1768.46
Tnfsfm13	ENSMUSG00000018752	6	0.456897	33.987	99.2558	65.3179	129.943	97.1186	131.192	110.006	94.5533	108.638	108.897	156.01	186.381	207.845	142.409	187.864	103.262	161.811	155.731	148.847	121.155	216.606	178.227	212.512	226.862	224.296
Adamts4	ENSMUSG00000006403	7	0.438934	275.904	237.105	288.011	257.73	222.286	299.012	279.203	322.302	338.422	288.952	734.755	707.433	812.936	670.88	691.177	431.836	492.695	565.904	473.922	432.747	327.39	413.168	372.323	352.638	365.304
Adamts6	ENSMUSG00000046169	7	0.201703	675.191	972.508	865.581	1124.11	799.855	690.187	810.539	868.402	823.343	884.159	1710.92	2008.29	1616.37	921.522	1372.82	561.826	377.185	286.572	253.223	338.914	1207.16	819.448	1308.51	888.016	1332.82
Adamts8	ENSMUSG00000031994	7	0.30401	100.433	92.0697	76.6726	87.249	104.951	306.743	282.033	306.024	247.063	261.222	316.405	432.055	435.662	343.582	374.716	252.894	215.15	124.464	151.4	61.8255	68.1673	42.4778	42.1468	52.6939	45.7668
Adamtsl5	ENSMUSG00000043822	7	0.688117	50.0341	37.1582	30.2507	47.1296	24.7978	332.689	237.108	182.667	250.002	177.685	721.575	645.172	848.691	640.082	682.841	272.479	213.816	190.675	220.931	219.636	36.6462	34.2681	18.633	27.8265	24.1484
Aebp1	ENSMUSG00000020473	7	0.295634	919.338	806.682	918.151	1028.54	661.174	543.404	628.666	609.389	697.764	532.612	1920.34	1584.31	2009.64	2016.63	2094.52	1170.05	1874.48	982.715	793.454	1063.29	1142.41	975.002	1246.7	1651.57	1285.18
Angptl1	ENSMUSG00000033544	7	0.559819	1685.62	1794.22	1074.14	1153.79	856.168	2901.39	2336.25	2910.93	2131.33	2134.82	4189.49	4372.85	4871.83	4109.23	4809.19	2819.58	2816.93	1853.61	2639.88	1661.32	2232.92	1871.27	1787.82	1538.66	1758.26
Angptl4	ENSMUSG00000002289	7	0.338349	1334.55	1345.14	1312.66	1570.08	1118.94	2462.78	2065.84	1660.46	2164.26	2193.82	2034.57	2740.63	2414.25	2186.54	3602.59	1615	1501.43	1954.25	1891.97	2013.53	1612.49	1729.17	1651.96	1922.81	1556.8
Bgn	ENSMUSG00000031375	7	0.548791	4542.27	4067.14	3850.5	5368.95	4128.68	3660.33	3922.04	4777.23	3644.21	3158.58	8683.39	9663.14	9756.09	8545.04	12509.5	5005.28	6456	4445.89	3261.68	4953.68	1459.59	1240.58	1437.59	1800.17	1854.51
C1qtnf3	ENSMUSG00000058914	7	0.767514	119.097	148.749	66.9457	42.1287	70.526	16.9197	28.242	82.5788	32.8081	28.1142	593.021	563.874	1496.96	1343.64	373.343	249.333	434.468	98.0122	224.708	252.53	6.80206	1.03042	2.76148	0.852792	2.86828
C2	ENSMUSG00000024371	7	0.29715	142.772	107.315	204.789	228.332	164.159	361.929	389.93	274.524	293.973	366.155	412.369	427.532	360.942	445.483	410.664	204.343	250.921	256.889	247.222	289.025	136.94	169.383	170.037	207.545	138.767
Cadm3	ENSMUSG00000005338	7	0.321439	75.3209	30.5801	28.879	24.0998	28.3914	194.047	123.82	266.713	108.688	183.463	561.737	532.773	544.184	680.675	610.189	263.075	372.042	470.622	314.377	476.297	150.198	190.309	170.672	113.026	204.245
Ccdc3	ENSMUSG00000026676	7	0.383198	198.108	364.722	180.69	195.664	211.017	393.552	343.644	347.055	306.119	363.553	1074.57	1466.12	1146.03	824.244	1797.33	480.244	506.578	426.68	384.465	502.643	674.219	702.283	646.467	621.135	600.736
Ccdc80	ENSMUSG00000022665	7	0.30755	4560.43	4064.78	4495.57	3821.68	2936.27	3650.61	3756.36	3768.27	2776.93	2823.73	6950.26	5723.63	5790.6	6215.5	6087.26	4155.27	3876.2	4985.79	5708.21	5998.79	3810.72	5876.67	4612.57	4028.6	3414.76
Clec11a	ENSMUSG00000004473	7	0.491547	193.848	259.494	100.814	133.831	94.723	222.828	164.228	154.884	146.844	112.675	265.228	400.179	379.183	332.019	470.272	112.469	101.117	104.682	99.6762	136.894	48.7281	62.3831	48.9166	41.7644	50.8085
Cntn4	ENSMUSG00000064293	7	0.247933	38.1507	35.468	24.5091	12.6615	10.966	132.79	111.17	130.759	87.6534	117.253	242.127	179.093	594.855	507.322	326.472	38.9055	46.4265	48.2434	21.6837	88.0894	328.719	235.32	247.959	193.825	167.078
Col12a1	ENSMUSG00000032332	7	0.868688	12765.6	12476.7	10277.5	13526.1	9544.68	14417	15682.4	13570.7	13136.9	12284.3	36713.8	33031.4	37270.8	30990.6	36668.4	18022.7	21544.6	12286.3	14166.6	12166.2	8458	9455.05	10255.6	9903.68	10650
Col16a1	ENSMUSG00000040690	7	0.871101	6442.21	7202.45	5744.63	5776.22	3414.72	9740.49	6868.99	6342.86	6758.35	5397.1	15748.7	13197.8	15528.8	14928.4	16823.2	5869.47	8563.96	8764.22	7926.22	8411.81	4007.73	5512.54	6041.72	6150.28	4045.37
Col1a1	ENSMUSG00000001506	7	0.542215	46867.2	44253.6	44896.7	62104.9	36923.6	43860.9	33086.4	31432.1	35135.8	25912.7	111453	98494.1	110058	110737	143709	45579.3	74127.7	45658.8	33581.1	46751	8863.54	9880.05	8267.96	9777.22	12019.1
Col1a2	ENSMUSG00000029661	7	0.603902	106456	125390	131211	140182	117160	116601	116485	77865.4	102547	86244.1	239600	250044	280161	282151	278111	119343	144170	116208	93695.7	107268	54616.2	63401.2	55062	62543.4	59268.3
Col3a1	ENSMUSG00000026043	7	0.568148	203203	231070	191530	175966	142760	319566	309185	260388	275227	242051	618861	604624	682665	615334	545957	369890	362989	419326	391212	372524	198894	230646	186780	184524	201988
Col5a1	ENSMUSG00000026837	7	0.632254	20773.6	17830.9	20980.4	19825	16928.6	22082.1	27026	21433.3	22778.1	16338.2	48593.3	42546.9	53096.7	57928.1	48749.8	31968.8	43104.3	30708.7	25565.2	28657.2	16219.6	20007.2	17424.9	25043.9	16730.3
Col6a1	ENSMUSG00000001119	7	0.350392	24508.9	19553.5	23894.6	21407.5	20459	30907.5	33981.4	25767.6	32164.6	27648.5	44731.1	45731.7	49815.8	45536.7	48427	31596.3	29942	33044.1	33468.2	29526.2	12336.7	17800.4	13610.4	14003	12913.6
Col6a2	ENSMUSG00000020241	7	0.520988	18506.5	13208.3	17025.7	15639.2	14334.3	21549.8	23068.6	19591	21226.8	17753.6	35478.2	33877.4	41109.7	36588.9	40457.6	22231.2	25337.8	21641.2	20419.8	18303.4	8106.15	9769.58	8444.38	10999.2	8617.75
Col6a3	ENSMUSG00000048126	7	0.679195	21301.9	23097.4	19021.9	28480.9	21412.7	20799.2	27608.9	19144.7	22483.3	20038.1	87359.6	84367	82137	71659.1	107669	40072.3	49791.3	43121.2	34359.3	36665.6	25785.9	23615.4	23859.5	28936.5	28079
Cpq	ENSMUSG00000039007	7	0.451446	716.67	767.628	618.576	882.731	809.151	782.892	752.865	646.903	896.728	857.787	1328.2	1580.05	1727.62	1518.17	1798.14	555.288	809.038	738.571	583.69	806.679	230.118	248.241	236.821	190.945	224.047
Crtac1	ENSMUSG00000042401	7	0.28375	31.4244	109.507	97.5945	88.2634	66.0414	105.67	139.243	45.1264	156.094	41.9197	87.836	283.124	266.418	205.179	391.871	29.3845	13.4696	2.34188	3.87485	6.77179	43.4616	151.412	95.5173	101.882	196.02
Dcn	ENSMUSG00000019929	7	0.463246	15135.8	17513.3	9999.72	11624.5	9056.23	28910.8	22858.5	24211.3	22961.3	24889	58491.7	64013.9	74187.4	67621.7	62383.2	37092.4	38894.8	38163.7	37640.1	46463.3	16748.4	29826.6	19828.8	17827.2	27505.2
Dkk3	ENSMUSG00000030772	7	0.814748	149.114	144.05	122.528	99.9495	110.667	195.113	202.199	217.985	205.115	219.188	647.704	582.844	660.239	561.879	761.922	338.533	297.404	204.064	254.276	258.114	178.965	184.314	117.975	111.076	137.482
Dmkn	ENSMUSG00000060962	7	0.319657	2.048	0	7.05456	1.35277	1.20222	0	1.21688	6.98104	0	0	139.127	25.9752	12.4235	56.855	791.082	531.047	5.71856	16.9862	16.9495	23.3598	0	4.58716	0	0	2.80461
Ecm1	ENSMUSG00000028108	7	0.828507	156.675	190.56	144.089	109.02	75.7904	136.125	147.193	123.593	142.615	135.157	902.492	1060.18	1109.61	651.818	1075.33	302.211	238.53	240.278	225.629	492.69	96.9701	81.6603	80.0523	71.9503	92.7213
Efna1	ENSMUSG00000027954	7	0.538284	320.348	369.546	363.18	330.088	360.796	435.639	368.043	328.678	333.371	339.525	498.201	528.872	499.538	402.525	633.271	323.663	363.545	398.312	452.796	406.191	318.939	316.013	288.998	247.73	256.834
Emilin1	ENSMUSG00000029163	7	0.186785	3402.96	4307.9	3633.92	3901.98	3020.36	3833.54	3629.27	3583.31	3890.08	3621.44	4157.3	4805.07	4318.07	4440.37	5741.5	2085.22	2858.33	2264.71	2270	2586.13	4036.35	3218	3456.48	4563.75	3288.34
Fam131a	ENSMUSG00000050821	7	0.655016	139.257	181.977	237.958	265.805	239.946	186.017	258.858	176.999	226.441	192.558	303.987	365.144	381.289	424.912	537.682	241.508	260.156	260.526	316.907	215.949	223.939	261.905	240.772	210.008	202.098
Fat4	ENSMUSG00000046743	7	0.544241	11558.8	11427.8	9837.88	13156.8	9089.47	20472.4	18870.6	16937.9	14531.1	14005.1	33062.1	28893.4	27796.9	22870.4	35172.3	8878.24	13762.9	12034.3	9653.81	15509.7	11074.6	8803.63	9522.64	9467.25	10199
Fmod	ENSMUSG00000041559	7	0.342386	507.959	498.434	188.148	290.541	143.143	243.535	202.677	200.751	115.158	119.599	457.95	687.027	531.189	553.069	876.977	114.109	118.947	107.391	57.4293	102.335	2.34491	0.833896	0.846203	7.95324	0.878932
Gdf7	ENSMUSG00000037660	7	0.590562	41.2893	23.3564	34.6877	31.9938	33.5599	42.9756	23.5898	19.0067	19.3071	12.2498	237.611	287.88	245.651	147.704	364.128	3.42381	3.01787	1.31713	5.16047	4.15488	0	0.959129	3.89314	1.8034	3.03279
Grn	ENSMUSG00000034708	7	0.352083	1647.35	1671.41	1849.45	1918.34	1645.51	1236.58	2014.84	1531.13	1659.81	1351.69	2126.32	2276.24	2694.58	2572.52	2651.71	2119.62	2469.93	1860.52	1592.15	2099.8	1462.67	1456.17	1330.43	1655.45	1488.64
Inhbb	ENSMUSG00000037035	7	0.549972	227.931	139.963	248.158	158.395	151.932	164.072	183.214	173.05	128.197	115.316	1098.48	1305.09	1000.66	702.348	1557.15	30.3667	47.5846	23.8517	50.8552	42.8448	85.9386	84.1227	98.7924	141.288	105.602
Kera	ENSMUSG00000019932	7	0.254952	102.249	54.1464	55.8356	64.3743	53.4576	539.886	449.016	472.301	379.153	470.947	3350.07	3785.48	3461.1	2574.89	3661.26	47.2371	55.5154	64.9296	76.2828	65.8348	1454.75	2515.17	1783.06	1630.59	2336.2
Lama3	ENSMUSG00000024421	7	0.480494	184.241	263.035	148.509	299.088	141.257	45.9647	87.019	68.8691	44.7052	33.5186	829.875	516.782	548.275	337.025	697.766	307.579	258.661	220.322	222.935	233.203	34.8327	49.003	22.7248	40.6029	30.3476
Lox	ENSMUSG00000024529	7	0.519642	6943.59	8177.07	6471.58	8835.48	6067.19	7935	6886.47	7074.33	6339.64	6149.95	14444.7	15788.8	17828.8	15345.9	17196	6359.97	9891.5	6435.24	5421.57	8001.34	2209.64	2308.64	2004.88	1980.04	2791.88
Loxl2	ENSMUSG00000034205	7	0.371039	8292.02	9478.51	7998.34	8526.46	7570.07	8116.16	8768.36	7043.21	8316.87	7953.53	12683.1	14314.9	12590.1	11267.7	15500	7488.7	8198.45	6553.47	7406.02	6511.54	9076.96	9395.43	8982.61	10028.1	8584.46
Loxl3	ENSMUSG00000000693	7	0.248103	225.053	472.606	311.832	436.303	243.585	611.301	345.333	455.355	340.392	462.86	762.744	1182.52	780.549	649.289	1438.79	672.38	727.148	493.513	621.36	710.142	780.724	570.446	871.47	952.103	410.537
Loxl4	ENSMUSG00000025185	7	0.62828	138.035	139.546	123.091	187.507	186.281	393.149	334.076	157.821	325.089	296.145	1135.66	1189.71	1313.51	1064.25	1932.18	133.731	90.7322	110.654	73.086	115.639	26.2785	15.722	27.7565	7.68595	25.4552
Ltbp1	ENSMUSG00000001870	7	0.290159	4657.46	5704.65	5952.69	6175.93	5337.86	4551.82	5515.81	5696	4589.02	4404.94	8782.89	6761.23	6126.39	8672.88	7857.91	3914.38	5197.39	5945.09	4927.32	7142.99	2931.26	2166.77	3623.29	3270.35	3016.42
Ltbp2	ENSMUSG00000002020	7	0.788146	19.6999	0.760257	33.5137	9.18123	9.40178	35.6927	36.2895	65.1875	34.4775	35.0035	973.341	843.479	1584.97	1439.67	797.514	199.238	223.546	236.22	154.484	232.558	4.3858	15.9372	4.25091	58.6699	9.79723
Ltbp4	ENSMUSG00000040488	7	0.644009	436.311	642.969	547.153	381.852	355.247	648.264	628.299	1071.49	765.932	696.196	1728.86	1543	1900.66	1598.93	1548.42	1145.47	1635.98	742.186	534.205	643.623	464.14	602.372	678.237	872.358	492.607
Lum	ENSMUSG00000036446	7	0.653612	7577.1	10381.8	5471.89	7428.45	5602.73	19366.1	17101.5	16470.3	17635.3	18747.2	33702.2	37701	44760.5	44591.6	40181	15076.5	17087.8	17941.8	15904.4	21052.5	8234.16	9780.92	6969.18	7305.22	9416.52
Megf6	ENSMUSG00000057751	7	0.169834	1988.98	2278.03	2041.12	2226.44	1721.5	2041.01	1757.2	1508.08	1609.32	1349.44	2403.15	2666.81	2304.42	2415.25	4044.17	265.208	439.908	297.743	252.077	127.135	1589.88	1446.78	1260.73	1592.42	1513.17
Mfap4	ENSMUSG00000042436	7	0.449116	2547.49	2611	2761.19	1908.91	1886.49	5102.59	4184.86	3093.24	3518.72	4236.5	9067.28	7004.57	9009.05	8398.66	8594.21	1849.49	1429.72	1263.97	2323.53	1461.17	484.434	738.678	450.94	332.381	368.078
Mmp19	ENSMUSG00000025355	7	0.413667	21.7029	10.4086	11.8514	8.01331	40.6618	118.593	257.034	67.4891	122.773	82.4223	1166.69	1953.38	1857.8	948.738	2485.58	520.548	736.58	1189.08	931.705	1091.79	39.974	36.456	98.8689	51.6988	62.3008
Olfml3	ENSMUSG00000027848	7	0.257902	4715.46	4327.27	4131.92	4066.61	3373.49	4961.8	4457.95	4974.21	4442.1	4133.57	6454.93	7082.95	6336.73	5945.03	8341.09	2341.84	2218.5	2506.16	2347.73	2202.51	1204.82	1340.59	1223.15	1123.76	1282.97
P3h1	ENSMUSG00000028641	7	0.36801	2313.19	2216.01	1975.02	2166.35	1505.92	1878.06	2323.02	2137.23	2249.17	1785.39	3240.77	3019.05	3262.29	3963.79	3232.28	2532.86	2891.7	2698.34	2352.23	2985.3	2542.19	2596.47	2118.25	2576.22	2088.59
Papln	ENSMUSG00000021223	7	0.301065	56.8776	27.8589	44.2725	43.4811	50.7045	330.639	279.843	262.406	240.117	202.784	385.794	348.5	326.913	306.267	403.256	137.496	172.751	139.395	124.639	137.651	98.6726	121.16	82.572	126.3	71.2936
Pcolce	ENSMUSG00000029718	7	0.428146	3430.8	3787.01	3042.89	3263.93	3208.97	3558.33	3321.99	2620.02	2926.11	3011.96	7270.55	8057.25	9306.69	8944.41	8198.65	5246.46	4765.05	6011.23	4943.62	4707.74	1109.57	2131.03	1569.76	1290.51	1297.99
Pcsk2	ENSMUSG00000027419	7	0.699585	173.045	254.773	107.202	164.957	126.803	120.61	75.4263	160.294	91.3565	77.2432	1713.02	1965.8	1560.85	1046.47	2353.08	143.789	227.217	288.599	227.204	491.492	113.944	157.648	117.434	144.523	166.908
Pdgfc	ENSMUSG00000028019	7	0.195004	356.044	621.048	404.453	468.345	439.359	283.043	295.028	493.363	324.823	287.56	592.321	587.038	423.811	431.016	682.37	269.713	351.381	178.655	186.765	167.576	215.849	68.8081	97.5465	85.0477	118.512
Penk	ENSMUSG00000045573	7	0.481788	669.366	298.296	397.142	481.513	375.294	581.458	546.789	708.998	680.257	686.393	1190.3	922.055	2041.5	1867.04	1077.82	429.949	559.833	487.959	436.917	470.534	664.68	600.927	556.186	799.279	613.114
Pla2g7	ENSMUSG00000023913	7	0.63358	61.9953	102.895	75.6582	49.2648	41.5403	216	175.53	82.9398	97.0601	80.0784	831.75	755.553	599.85	643.004	1191.05	343.797	327.941	307.455	328.051	457.952	121.769	137.636	117.57	135.515	156.866
Plac9b	ENSMUSG00000072674	7	0.322893	44.7967	132.125	135.893	111.572	18.7363	155.032	255.129	164.749	283.279	229.158	397.199	904.615	913.012	1153.55	1674.9	666.925	727.714	218.051	545.558	1060.73	122.562	292.734	87.8557	124.371	120.14
Pnp	ENSMUSG00000115338	7	0.790134	851.726	1251.81	1099.99	1284.3	1277.49	1463.21	1399.01	997.708	1520.95	1504.76	2108.65	2476.77	2405.15	2103.05	3266.3	1637.16	1549.35	1332.8	1358.18	1698.99	1002.08	959.229	870.285	1123.07	1017.23
Prn	ENSMUSG00000098754	7	0.503753	82.2076	141.53	285.463	240.552	465.871	490.353	251.746	0	141.462	331.001	242.176	790.787	475.908	366.451	1214.8	192.534	86.3248	56.3823	429.755	0	173.584	0	60.7427	47.4822	126.184
Ptn	ENSMUSG00000029838	7	0.266627	6316.57	10572.3	5123.42	3887.24	3950.61	18453.3	20173.8	20554.9	16772.1	17689.1	34762.1	39108.3	38008.1	31231.4	32885.5	20008.4	22543.1	27114.8	25958.7	33174.8	11051.8	14531.5	11456.5	9536	12842.7
S100a4	ENSMUSG00000001020	7	0.333571	82.5812	104.064	82.5127	74.4799	79.8037	84.8758	91.3731	115.609	91.9069	90.2536	465.149	699.978	544.391	585.62	461.591	234.916	204.629	416.223	345.385	477.879	29.1648	43.3662	21.3656	18.9328	9.91576
Sema3a	ENSMUSG00000028883	7	0.197634	1785.01	3110.7	1235.52	2362.15	1578.49	3126.81	2849.97	2720.05	2359.79	2537.85	4292.91	4161.67	3558.96	3157.43	4152.17	1482.38	1908.08	1703.33	1539.56	2058.14	2761.69	3589.67	3281.28	2766.29	3863.54
Serpinf1	ENSMUSG00000000753	7	0.460853	2047.84	2289.73	1363.8	1900.16	894.784	2096.43	1772.78	2070.63	1551.53	1501.74	7423.39	6987.41	7777.75	7441.51	7992.03	3078.93	4708.39	5309.84	3849.68	5100.62	2506.37	2559.99	2662.17	2289.11	2052.2
Tgfb1i1	ENSMUSG00000030782	7	0.32444	1087.89	771.76	875.405	889.844	628.66	469.345	677.242	780.932	731.363	554.3	913.226	1108.07	942.872	1091.96	1278.87	766.873	851.061	836.98	623.109	794.794	772.261	707.611	752.057	949.059	690.346
Tgfbi	ENSMUSG00000035493	7	0.515523	1112.19	2138.52	841.728	861.103	622.714	504.192	690.075	701.467	599.278	450.713	3175.42	3865.87	3804.02	2946.57	4570.59	827.022	914.216	695.742	751.697	721.669	1421.39	579.138	1060.51	877.432	939.61
Timp1	ENSMUSG00000001131	7	0.720734	267.077	374.583	247.423	289.255	208.305	377.496	304.161	312.232	317.63	299.749	731.906	678.551	987.944	715.026	701.581	320.85	243.123	350.372	304.075	388.422	261.922	355.979	285.414	262.25	281.622
Timp2	ENSMUSG00000017466	7	0.285262	4326.33	4182.66	3878.84	4258.47	3040.34	4593.89	3986.26	4065.7	3851.21	3755.97	6804.1	6548.46	6976.07	6658.04	8330.13	3591.18	4841.38	4086.8	3553.32	4800.91	5707.48	5627.83	5526.22	5936.08	4936.07
Timp3	ENSMUSG00000020044	7	0.266777	1868.77	2106.47	1619.47	1985.81	1731.18	2220.55	2542.98	1735.61	1962.62	2021.77	6853.7	8139.12	6264.99	5664.75	9425.39	3654.03	3760.97	3580.69	2947.81	3824	5517.97	4673.45	4683.14	5232.24	4677.37
Tnc	ENSMUSG00000028364	7	0.18334	4814.39	3432.63	4015.59	3022.69	3293.56	2981.53	3439.35	2898.27	2095.71	2328.86	10643.9	12628	9485.37	8154.66	15603.9	2822.86	4254.66	2544.76	2996.05	1558.46	12700.3	6876.92	9646.6	9044.06	8881.21
Vcan	ENSMUSG00000021614	7	0.492342	41299	39473.5	44607.8	55722.5	50494.8	42782.9	46753.3	38198.4	43224.1	40596	86475.3	88446.5	73947.8	61706.9	108306	33788.6	41456.1	32075.8	30700	36487.5	27649.1	25480	31070	27765.4	30982.8
Xylt1	ENSMUSG00000030657	7	0.789072	247.001	272.9	220.08	202.042	230.458	236.394	211.62	251.808	261.327	151.056	429.664	334.831	441.918	343.221	604.711	270.299	323.798	199.411	233.38	301.948	249.312	152.677	162.111	249.053	165.189
Ada	ENSMUSG00000017697	8	0.262689	329.014	251.713	256.022	261.75	226.526	338.491	306.608	253.823	365.569	311.785	243.554	281.922	268.125	359.814	309.697	400.709	304.007	365.936	414.892	354.473	100.548	143.736	115.25	92.3675	108.906
Adam15	ENSMUSG00000028041	8	0.49964	729.56	960.446	853.029	698.475	1048.69	1064.05	1184.49	768.914	899.405	864.118	1540.97	1378.33	1901.02	1637.02	1161.5	1588.48	1207.65	1539.55	1341	1700.44	604.22	866.733	766.815	506.705	732.018
Alox5ap	ENSMUSG00000060063	8	0.787802	238.503	89.5761	175.065	135.852	70.3251	184.443	124.255	284.23	175.532	149.159	410.468	287.711	283.693	390.747	334.397	200.28	258.056	298.679	297.365	334.489	49.2308	46.0946	50.7106	73.6749	39.8176
Anxa5	ENSMUSG00000027712	8	0.424693	6731.47	5248.78	4631.72	5063.65	4129.95	6186.58	6072.69	8624.57	5617.3	6826.99	8527.31	8169.39	10354.5	8846.04	7458.92	7931.68	7202.37	8353.15	8328.29	8544.13	4706.58	6231.52	4901.95	5225.76	4371.17
Apoc4	ENSMUSG00000074336	8	0.441681	320.494	156.52	313.607	203.806	390.528	202.506	221.886	331.615	228.272	223.044	395.749	303.316	362.596	592.588	238.854	209.632	266.559	381.502	328.634	441.462	179.24	133.671	211.002	239.99	240.688
B2m	ENSMUSG00000060802	8	0.511975	2578.6	1953.36	2064.37	2006.61	1982.62	2604.09	2263.11	2678.92	2250.83	2703.32	4042.17	4323.86	4633.78	4786.42	4478.69	4292.96	4151.76	4652.4	4543.4	5918.86	911.658	1346.91	1123.16	827.291	1279.18
Bglap3	ENSMUSG00000074489	8	0.386843	400.845	37.4388	116.091	33.5049	116.074	127.238	58.691	165.834	136.216	114.613	101.313	226.421	226.747	384.537	111.621	70.9377	103.265	225.405	167.679	201.505	25.6872	63.383	34.7985	118.226	31.9985
C1qa	ENSMUSG00000036887	8	0.702831	438.82	522.053	438.93	436.22	310.429	603.076	422.435	497.159	473.941	410.208	1101.89	1062.34	1013.98	1047.14	1020.27	926.748	1022.08	962.018	996.762	986.476	172.763	180.533	171.688	159.06	204.23
C1qb	ENSMUSG00000036905	8	0.823622	637.993	581.308	598.682	513.3	440.79	608.619	551.539	643.439	581.937	639.079	1064.33	1074.35	1150.87	1332.72	1262.47	1027.97	1046.86	1026.95	1128.98	1179.8	153.272	220.231	161.137	136.845	195.264
C1qc	ENSMUSG00000036896	8	0.783669	719.563	729.197	649.716	747.886	484.077	795.411	618.052	687.063	673.124	647.747	1528.75	1405.68	1380.56	1668.52	1399.63	1382.03	1284.84	1341.32	1370.4	1374.99	189.764	181.955	137.763	152.448	254.493
Calm1	ENSMUSG00000001175	8	0.252729	15120.7	15025.2	14402.3	15301.8	13931.8	16034.8	14935	14141.6	15697.5	16499.6	14182.1	15012	16719.1	14141.3	15845.6	16368.5	14348	15539.3	16980	16580.8	10638.2	11878	9388.13	8855.26	9972.48
Calu	ENSMUSG00000029767	8	0.263235	28493.6	23131.7	21211.3	20796.4	20809.7	22341.7	23721	25765.3	22453.2	23060.2	25303.8	23657.2	27059.4	21006.6	22889.6	23158.9	19132.2	25914.8	25440.9	28354.3	13555.8	16653.6	13057.8	10076.8	12528.1
Ccl9	ENSMUSG00000019122	8	0.391862	72.5759	230.847	221.506	159.373	158.891	299.996	218.371	319.424	273.052	273.264	294.798	480.12	486.937	484.721	364.348	512.269	595.995	457.128	622.795	436.859	24.5951	21.8662	45.5683	34.76	34.3612
Cd34	ENSMUSG00000016494	8	0.733536	8953.32	7012.27	7295.4	6149.63	5768.77	11798.9	10063.9	12784.6	9019.92	10078.9	21563.7	15465.7	21473.3	20204.6	16110.4	15272.6	14208.9	19412.2	15740.1	18677.2	3726.31	3498.39	3168.81	2545.07	3980.15
Cklf	ENSMUSG00000054400	8	0.266405	477.616	745.435	500.44	547.585	714.439	512.359	686.104	431.611	463.066	490.365	497.071	763.819	721.115	694.795	425.373	497.949	500.713	562.408	625.438	717.356	203.48	376.306	257.746	218.458	390.193
Cldn1	ENSMUSG00000022512	8	0.287563	270.564	182.264	244.098	200.718	230.423	1334.11	1140.48	925.198	857.725	903.178	1161.09	1319.69	1047.77	1344.69	1451.65	1090.57	928.788	725.849	735.505	666.512	61.6525	44.8029	28.5213	27.2376	58.4701
Col14a1	ENSMUSG00000022371	8	0.51309	9836.96	8967.87	9662.38	11284.6	10330.9	15476.1	18988.2	17053.5	18500	16231.6	28626.3	29513.2	29486.3	29022.2	32086.7	19456.6	27571.3	19072.7	19105.3	18064	676.661	1170.95	772.49	1017.75	1600.18
Col4a1	ENSMUSG00000031502	8	0.631885	23704.7	25168	26415	14926.9	24572.5	25092	26505.2	21096.6	25999.9	20989	41791.4	37829.8	37438.8	33094.7	35414.8	34747.1	28541.8	43686.5	46051	38315.6	11309	14527	12353.9	10772.1	9280.06
Col5a2	ENSMUSG00000026042	8	0.655542	41028.5	52681.9	37684.3	39458	32684	50189.9	47552.2	45208.9	43703	39208.1	86401.3	84054.9	83180.4	78189.6	79839.5	59780.7	60733.6	67826.1	66034.4	69509.9	22296.4	26575.9	23289.8	20723.8	24762.2
Cpa6	ENSMUSG00000042501	8	0.291015	926.286	478.741	649.834	476.222	663.024	419.075	518.794	753.404	426.978	348.494	858.376	652.618	764.931	1185.14	510.153	416.18	483.588	744.136	690.49	798.78	394.64	281.343	376.512	501.646	367.1
Cpz	ENSMUSG00000036596	8	0.328085	485.825	696.108	400.501	499.709	289.903	218.356	198.609	177.502	162.552	150.156	1049.17	950.204	1312.95	1210.03	1009.07	655.039	836.167	758.018	585.667	671.651	42.5825	102.006	30.7333	36.0099	28.1665
Cst3	ENSMUSG00000027447	8	0.714648	1816.4	1845.66	1891.88	1724.89	1542.13	2053.5	1757.92	1606.65	2050.63	1897.58	2332.69	2458.82	2762.48	2754.1	2679.29	2851.58	2247.26	2512.81	2546.06	2302.54	1263.63	1991.33	1378.47	1439.26	1267.83
Ctsb	ENSMUSG00000021939	8	0.663932	4913.26	6408.2	5898.31	6370.84	6024.24	8052.25	7831.64	6052.32	7247.5	7493.57	9170.89	9952.2	9909.64	10510.5	10161.5	10714.2	10180.5	8184.65	8452.65	9332.59	4626.53	5286.89	4707.22	4930.07	4836.53
Ctsh	ENSMUSG00000032359	8	0.331637	572.379	679.606	661.138	721.006	571.528	715.771	481.698	498.786	695.195	727.698	667.051	777.782	1060.04	996.97	642.952	814.85	691.51	655.26	563.819	583.657	253.199	232.216	144.711	218.635	295.989
Ctss	ENSMUSG00000038642	8	0.543896	396.216	497.534	479.256	403.186	402.338	553.19	436.675	493.335	380.707	434.856	961.88	958.988	932.814	1073.84	921.37	584.841	659.245	646.645	698.75	902.877	186.939	219.286	160.178	144.843	243.084
Ctsz	ENSMUSG00000016256	8	0.450956	2542.39	2060.63	2431.18	2220.06	1969.49	2294.79	2477.65	2541.25	2408.55	2222.69	2503.16	2797.65	2961.99	2861.63	2810.53	2512.57	2684.57	3106.02	2784.83	3092.14	1255.41	1569.98	1278.55	1271.59	1215.42
Efemp2	ENSMUSG00000024909	8	0.200442	4683.68	2557.4	2797.79	2881.95	2084.02	2708.48	2792.82	3176.53	2867.95	2655.14	2944.14	3276.4	3234.61	3451.31	3491.11	2078.92	2861.76	2872.54	2228.45	2953.07	1588.8	1760.92	1471.55	1900.69	1326.06
Egfl7	ENSMUSG00000026921	8	0.48993	1418.95	1875.11	1944.32	1960.14	2486.81	2505.37	2386.49	1568.83	2014.45	2348.96	2357.58	2826.96	2886.18	2538.65	3021.95	3897.49	2660.97	2511.99	2654.82	3004.53	1308.59	1483.14	1467.88	1185.88	1651.43
Entpd5	ENSMUSG00000021236	8	0.274767	768.085	852.313	785.289	747.806	812.274	676.487	747.8	971.872	894.848	803.451	984.419	924.108	1170.64	806.877	593.2	1151.87	949.736	1131.01	1005.7	1528.65	412.974	490.272	435.312	428.914	507.789
Fam3c	ENSMUSG00000029672	8	0.233278	1501.98	1069.03	1240.64	961.312	1007.55	927.931	933.142	1325.13	911.841	1055.96	1018.36	1197.49	1177.62	1048.27	1144.04	972.368	866.058	1311.23	1177.75	1392.69	619.53	777.102	599.629	528.247	712.059
Fbln2	ENSMUSG00000064080	8	0.491208	2517.39	3798.78	2588.97	2719.38	3186.78	4894.98	5030.28	3499.85	4997.2	3354.82	11764.9	13948.1	11602.5	8690.17	13677.2	11413.6	10271	9706.6	9209.74	10570.8	1156.87	1812.66	1713.06	1061.44	1841.01
Fibin	ENSMUSG00000074971	8	0.246842	1885.22	1899.21	2199.3	1766.9	1545.58	4051.92	4019.31	3683.76	3792.3	4293.98	3540.17	3622.04	3871.78	3503.62	3233.37	2914.08	3317.04	3111.32	3399.16	4487.21	1658.53	1118.17	1207.57	699.332	1154.65
Fndc1	ENSMUSG00000071984	8	0.519352	1677.15	1246.89	1398.1	2444.13	1773.59	2023.36	2051.43	2289.38	2130.3	1318.61	5084.18	5036.72	4760.03	4670.87	7043.86	3193.65	6480.92	2042.81	1885.84	3515.29	160.992	93.5647	54.8744	119.498	121.672
Fstl1	ENSMUSG00000022816	8	0.818508	21404.2	25987.4	25764.6	23100.6	23714.3	33419.8	34280.8	22252.3	31227.8	29869.8	50849.8	58049.7	42506	48122.9	40976.7	49257.2	36727.1	42043.6	42899.8	44177.7	12295.1	18803.2	11932.6	10217.6	12176.4
Gas6	ENSMUSG00000031451	8	0.589417	624.147	673.255	545.948	542.099	453.92	1321.45	887.589	932.173	810.361	822.176	2255.01	2242.45	2393.82	2671.25	2234.3	1635.3	2158.16	1733.22	1573.46	1201.75	139.096	120.04	69.0587	105.744	107.595
Gdf10	ENSMUSG00000021943	8	0.484839	669.946	787.677	646.763	564.122	612.417	1068.69	1083.14	1171.19	854.648	1084.5	1614.14	1306.29	1585.78	1668.22	1182.74	941.369	1404.74	1971.74	1268.33	2312.58	278.193	424.394	259.929	278.133	571.845
Ggh	ENSMUSG00000073987	8	0.401337	535.744	736.596	580.846	700.493	649.931	697.307	614.193	544.963	654.194	645.241	909.517	1025.08	1252.64	1281.64	1116.14	1008.85	916.995	906.364	842.162	980.206	502.342	608.708	481.493	459.409	645.567
Gm49342	ENSMUSG00000021871	8	0.689189	364.263	303.424	278.403	237.168	174.44	399.095	388.261	498.115	348.075	411.968	708.035	568.423	763.212	717.44	386.511	417.261	453.045	669.172	580.766	755.532	129.351	152.177	148.668	95.9694	76.7109
Gng11	ENSMUSG00000032766	8	0.374706	603.91	937.857	792.556	734.375	943.479	1475.54	1203.7	835.61	1240.79	1253.51	1488.92	1628.36	2046.13	1617.14	1695.4	2060.44	1766.58	1588.79	1875.54	1654.23	736.237	785.46	583.163	526.054	819.91
Gpx3	ENSMUSG00000018339	8	0.622445	136.592	146.657	119.559	131.334	95.0668	186.54	166.449	118.547	187.173	172.767	200.898	301.508	239.583	228.896	287.487	201.547	256.472	183.491	173.982	209.964	108.951	63.304	73.1252	75.2653	94.6744
Gpx7	ENSMUSG00000028597	8	0.431654	1764.41	1342.41	1114.5	998.207	803.317	1907.14	1815.65	1880.5	1455.54	1610.01	3087.25	2525.8	2929.96	2502.76	2883.69	1336.77	1683.44	2638.05	1696.15	2048.59	551.923	450.095	305.871	272.987	419.45
H2-K1	ENSMUSG00000061232	8	0.553074	129.424	147.971	227.75	140.142	122.2	216.591	120.833	213.98	184.472	244.874	549.361	396.227	497.789	755.714	293.977	380.914	339.654	473.704	469.472	697.063	53.0565	40.3821	61.1744	47.8133	60.4702
H2-Q4	ENSMUSG00000035929	8	0.446061	441.987	209.401	377.745	196.543	341.115	253.134	256.386	401.842	252.152	211.063	511.317	274.683	354.925	529.426	348.439	245.078	256.446	470.969	415.692	475.488	105.114	118.863	88.1538	215.956	92.317
H2-T23	ENSMUSG00000067212	8	0.439046	210.096	160.078	232.84	195.083	236.687	293.963	187.659	218.889	258.849	321.227	456.96	391.018	474.641	403.993	412.434	382.489	301.75	421.016	469.128	438.762	152.323	178.798	205.913	197.962	159.496
Icam1	ENSMUSG00000037405	8	0.730516	276.932	254.673	294.572	254.97	269.144	400.421	343.829	339.185	298.661	295.672	460.913	471.293	587.914	530.181	538.599	371.364	431.594	539.927	393.372	661.92	215.784	222.952	215.967	179.894	157.515
Icam2	ENSMUSG00000001029	8	0.330292	524.185	464.948	580.922	493.573	548.91	853.059	717.935	616.539	580.17	700.306	969.295	887.391	850.271	875.063	779.135	1022.22	909.13	1152.67	1125.62	1206.88	356.436	379.577	363.409	191.399	287.508
Il16	ENSMUSG00000001741	8	0.442529	397.753	489.984	455.586	408.864	464.658	393.014	351.587	446.365	370.473	361.342	610.26	492.279	602.072	855.33	588.643	470.239	441.254	483.146	458.637	689.382	134.314	259.752	129.863	147.951	149.708
Lama4	ENSMUSG00000019846	8	0.775951	8725.38	10360.4	9411.08	11130	10975	10375.2	11849.5	8802.97	11061.8	10499.4	15116.3	14246.6	14744	12605.2	14436.3	12605.1	13509.8	13410.9	12102.1	13445.5	6880.27	6476.6	7803.99	7135.47	7706.46
Lfng	ENSMUSG00000029570	8	0.397666	342.319	187.781	317.37	274.417	258.548	298.845	255.764	353.262	298.164	283.716	338.042	308.046	369.266	309.981	358.648	438.799	412.337	365.281	343.842	296.322	205.953	137.839	140.158	194.319	135.079
Lgmn	ENSMUSG00000021190	8	0.490243	1591.91	1402.6	1244.46	1219.45	1068.93	1197.1	1242.34	1323.81	1210.92	1273.28	1960.19	2026.96	1963.29	2041.15	1861.36	2072.05	2212.16	2011.54	2013.14	2131.35	826.186	843.466	745.277	746.318	791.602
Lrrc17	ENSMUSG00000039883	8	0.339357	5349.83	6529.71	4608.58	5558.36	4404.57	5318.08	4498.98	4603.89	4760.39	4578.46	6895.04	7419.92	8090.81	7551.7	8388.07	5043.64	5610.7	5243.14	5000.71	6415.21	2164.89	2666.24	2316.46	2205.17	2642.09
Ly86	ENSMUSG00000021423	8	0.585673	248.703	260.588	188.965	191.26	178.61	285.397	240.872	262.401	228.895	226.958	315.991	341.932	389.726	516.441	368.468	229.689	276.429	316.833	338.978	422.361	60.62	73.2978	41.4744	55.6503	59.93
Mcam	ENSMUSG00000032135	8	0.54331	1694.64	1777.5	1951.51	2155.38	1950.47	3036.6	2346.79	1962.4	2323.19	2328.71	3162.19	3152.86	3106.68	2619.55	3497.91	3830.35	3268.73	3168	3262.6	2916.27	1242.25	1171.04	1160.14	1143.2	1176.42
Mmp12	ENSMUSG00000049723	8	0.346615	827.571	262.746	571.571	299.459	615.369	417.398	399.828	658.836	363.343	331.433	851.281	623.824	738.336	1358.49	610.762	439.22	622.269	1014.43	735.232	987.553	296.413	264.312	527.805	488.986	423.85
Mmp2	ENSMUSG00000031740	8	0.183275	11144.5	11311.3	11553.2	11290.3	12360.9	9217.54	10117.6	7953.12	9826.44	10020.5	11775.8	12824.3	13429.4	13148.2	14269.8	6748.73	8001.7	8742.5	7463.47	10149.8	3726.92	4029.67	3824.26	3425.04	3394.59
Mmp23	ENSMUSG00000029061	8	0.366148	130.712	119.052	128.323	109.478	117.433	427.131	295.21	305.314	415.775	323.698	1107.72	1156.18	1455.1	1331.56	1159.45	854.711	785.091	911.273	661.472	958.782	80.2272	96.6677	67.2255	58.6355	92.834
Mrc1	ENSMUSG00000026712	8	0.405335	3114.62	3802.33	3049.14	3537.09	3066.33	3996.8	4020.11	3981.39	3640.97	4328.46	6201.97	6337.57	6940.19	6332.59	5281.46	7200.24	7523.25	8181.72	7300.89	8695.89	558.967	493.744	514.57	476.192	748.322
Nme2	ENSMUSG00000020857	8	0.202983	6979.58	8736.68	8538.03	8217.2	8587.9	9747.85	9180.1	7205.46	10545.1	9744.52	7546.46	8556.44	8813.1	8527.35	8601.67	11085.2	7677.98	8878.73	9792.71	7172.88	5465.35	7296.48	5101.5	4144.3	6107.48
Ntn1	ENSMUSG00000020902	8	0.330873	359.2	281.685	307.994	282.445	275.389	983.2	1054.04	1172.45	1109.01	977.852	1364.83	1236.86	1812.4	1727.54	1237.25	1316.53	1688.36	1210.82	1208.7	1145.23	415.637	381.979	300.737	367.029	436.325
Nucb2	ENSMUSG00000030659	8	0.614005	867.281	816.085	681.856	573.563	662.497	648.848	719.057	719.313	587.899	685.962	1210.76	1087.68	1402.65	1051.42	975.212	911.335	797.826	1084.62	833.522	1144.82	380.79	428.058	361.308	332.614	290.881
Nxpe4	ENSMUSG00000044229	8	0.266937	611.168	653.4	650.07	718.429	699.825	724.412	783.269	696.922	672.114	718.668	731.242	712.874	809.995	712.159	802.22	617.171	575.711	672.088	701.978	865.543	424.966	434.483	529.948	404.983	446.206
Ogn	ENSMUSG00000021390	8	0.32555	9462.33	10484	8063.6	9180.11	7737.28	8907.57	7206.08	8367.57	8275.32	8269.3	9262.51	10742.3	12522.7	12930.2	10274.3	10536.1	11127.9	7990.31	10264.6	8743.48	937.351	971.664	609.06	736.654	1659.75
Olfml2a	ENSMUSG00000046618	8	0.197925	1001.19	1079.86	1032.96	1171.44	1013.82	644.094	753.739	698.891	608.354	625.875	982.37	835.209	1072.13	927.564	938.526	1107.82	990.355	804.332	868.606	570.568	251.614	244.806	256.093	335.893	315.81
P4hb	ENSMUSG00000025130	8	0.445918	21212	25388.2	22931.4	22098.8	21006.4	24119.9	22554.8	21253.6	22873	23581.7	24668.9	27648.8	28806.4	29606.8	26360.8	22193.8	20882.7	26699.8	25474.8	26048.8	16216.4	21221.5	16039	15612.3	15447
Pdgfa	ENSMUSG00000025856	8	0.234597	398.296	313.291	270.93	435.186	295.523	330.537	441.994	520.235	411.173	390.855	578.971	304.688	278.523	319.915	351.262	545.131	634.498	349.045	449.525	208.992	255.433	105.206	175.037	193.422	100.141
Pdgfb	ENSMUSG00000000489	8	0.718864	388.46	326.749	477.883	370.609	452.344	426.843	396.333	447.394	447.62	422.245	563.285	561.788	597.201	453.765	797.244	535.106	543.081	643.497	572.597	675.94	302.356	262.134	292.711	305.652	223.114
Pf4	ENSMUSG00000029373	8	0.425429	295.247	449.379	317.626	348.833	385.187	421.007	434.006	343.001	389.824	471.593	961.684	977.164	1173.06	1426.33	862.81	1142.44	937.077	1146.34	1317.17	1156.9	76.1331	71.6162	51.403	116.466	59.8349
Pla2g12a	ENSMUSG00000027999	8	0.247127	170.361	220.987	141.604	167.721	228.674	156.256	205.298	117.857	199.488	201.394	178.269	171.253	175.768	201.36	207.52	282.738	212.215	213.942	181.272	211.58	162.071	138.482	114.993	138.266	120.247
Prdx4	ENSMUSG00000025289	8	0.600039	2222.83	3485.41	2680.97	2962.98	2854.98	3924.8	3414.89	2693.91	3758.87	3953.2	3907.34	4697.06	5851.24	5844.51	4607.49	4619.66	3918.84	4377.55	4280.6	4056.78	2168.16	2837.46	1996.82	1848.25	2688.82
Prl8a1	ENSMUSG00000019756	8	0.677817	726.347	248.239	500.16	216.825	630.193	302.626	423.356	658.691	390.78	370.57	600.991	727.002	643.234	1166.63	569.131	462.217	442.11	816.201	789.556	870.422	197.557	215.491	244.566	218.582	219.159
Prnd	ENSMUSG00000027338	8	0.436979	1389.36	860.924	1001.13	821.646	1081.77	1139.99	1228.54	1563.84	1036.56	1065.84	1957.88	1671.81	1746.59	1478.78	1330.94	879.897	1149.27	1669.05	962.531	1696.82	600.176	743.468	714.915	617.93	486.074
Psap	ENSMUSG00000004207	8	0.697038	8270.81	10050.8	9408.95	8939.79	9037.6	8780.95	9824.99	8109.74	9474.91	8965.77	11885.9	12376.5	13698.5	12501.8	12280.9	12422	11780.8	12295	11992.7	12549	5752.27	7185.16	6118.32	5714.18	5861.29
Rnaset2b	ENSMUSG00000094724	8	0.364133	1568.08	1076.97	1153.33	1081.35	942.298	1227.46	1269.92	1410.47	1065.09	1015.65	1213.34	1304.61	1416.67	1552.88	1404.16	1160.27	1156.9	1457.32	1370.02	1248.95	634.386	719.609	758.429	686.633	557.513
Sema4d	ENSMUSG00000021451	8	0.658177	378.873	33.7429	132.582	62.5944	177.394	122.219	119.142	249.318	148.221	114.375	264.841	270.859	270.41	652.375	273.996	197.888	159.849	329.331	304.444	475.459	48.9987	70.2089	90.7375	78.2395	72.2538
Sparc	ENSMUSG00000018593	8	0.548904	33906.5	34341	31178.8	31384.1	27829.2	31922.9	35165.4	29774	31693.3	30388.5	64893.3	63845.8	83249	76100.3	61524.9	49439.2	49391.6	50865	47165.3	51039	9581.62	11337.4	8688.36	10046.9	9803.45
Svep1	ENSMUSG00000028369	8	0.244574	3059.93	3054.71	3068.06	3941.69	3226.81	2755.53	3397.81	2653.39	2487.34	2378.89	3516.96	3458.2	3178.27	2751.22	3709.35	3083.9	4031.06	2685.68	2556.44	2919.61	1942.31	1164.72	1645.04	1718.14	1901.27
Syk	ENSMUSG00000021457	8	0.453325	421.293	398.743	377.088	377.706	386.767	372.954	408.878	449.233	320.028	361.873	545.099	451.354	419.266	502.207	496.602	395.313	456.91	537.538	418.733	648.295	226.958	143.674	198.58	232.654	219.793
Tfpi	ENSMUSG00000027082	8	0.355409	2111.83	1973.76	1924.21	1962.43	2278.26	2886.5	2635.43	2728.31	2916.89	2527.29	2746.22	3003.71	2697.17	2852.18	3034.34	2730.34	2610.89	2779.2	2633.71	3213.64	1675.18	1822.48	1731.08	1568.47	1955.32
Tgfb3	ENSMUSG00000021253	8	0.328761	975.629	1043.09	1063.2	897.004	685.57	834.773	898.031	1225.69	889.61	834.5	985.785	1022.68	1012.77	951.943	1095.96	1124.69	1228.28	938.166	1117.8	1239.37	703.456	719.296	723.198	775.752	656.526
Thbs2	ENSMUSG00000023885	8	0.515543	4492.48	4848.17	2669.03	3368.81	1919.98	4266.73	4017.63	3974.62	3917.04	3407.17	10229.6	9643.75	12545.5	12016.7	9153.74	8700.7	8869.03	6740.01	7071.57	5146.86	1104.44	974.009	951.501	943.529	989.754
Tnfaip6	ENSMUSG00000053475	8	0.335775	892.552	1563.1	1393.56	1450.96	1800.68	728.348	957.837	603.284	1081.52	1105.62	1734.8	1615.14	2104.28	1826.11	1443.11	1743.28	1333.36	1472.18	1409.71	1763.95	498.798	569.955	434.495	354.553	440.341
Tyrobp	ENSMUSG00000030579	8	0.663018	517.674	486.945	489.462	430.038	371.624	699.027	473.472	511.186	572.483	546.703	1348.67	1291.92	1548.33	1581.21	1243.95	1195.36	1037.85	1236.89	1335.84	1698.36	79.4895	153.59	89.8804	105.284	197.867
Abi3bp	ENSMUSG00000035258	9	0.287398	359.958	248.062	247.717	272.17	199.806	1840.15	1689.65	2112.6	1457.65	1380.47	2007.99	1890	2016.19	1885.58	2091.31	2323.78	3589.09	2347.1	2095.83	2959.68	385.001	477.236	447.12	397.425	612.75
Adam9	ENSMUSG00000031555	9	0.347943	1665.07	1884.85	1607.95	1434.63	1400.65	1888.08	2083.81	1759.99	1653.98	1610.86	2494.4	2085.27	2025.08	1931.37	1827.39	2447.46	2431.18	2335.61	2709.72	2238.09	1392.8	1473.3	1417.64	1280.89	1440.36
Adamts12	ENSMUSG00000047497	9	0.62105	2301.43	2271.53	2114.58	2621.78	2141.63	2608.7	2409.19	2483.29	2305.32	1981.68	6219.22	5513.03	5090.14	4759.07	5094.8	5410.87	6667.54	6557.93	6007.16	7854.02	2070.42	3195.57	2769.02	2624.91	3219.11
Alpl	ENSMUSG00000028766	9	0.358974	160.846	70.5594	75.3567	59.9273	74.9014	63.4935	99.878	86.9687	65.4397	40.0368	110.443	130.571	188.888	194.699	163.91	340.918	223.958	128.349	276.825	111.369	37.3107	21.4948	15.3492	20.9563	16.782
Ang	ENSMUSG00000072115	9	0.376565	89.9091	73.8995	59.4394	71.5117	47.1309	117.87	99.4742	175.743	129.882	125.754	138.103	243.289	219.489	249.196	181.151	236.364	207.765	174.6	148.579	194.668	84.6104	135.547	84.5942	77.9361	113.624
Anxa1	ENSMUSG00000024659	9	0.66748	117.468	151.69	74.8216	85.2047	84.0043	143.549	98.3368	108.767	83.1669	76.6089	3061.32	1761.47	3328.13	2152.55	2762.71	2842.63	2198.13	2259.55	3471.27	2361.27	186.82	431.6	242.448	483.095	388.054
Apod	ENSMUSG00000022548	9	0.850276	29.3486	21.8572	56.87	12.5466	15.6876	83.9454	60.8162	73.4673	59.9437	105.374	309.285	383.991	306.456	506.969	316.831	398.212	292.596	527.766	539.201	578.465	11.8942	26.2886	18.7065	43.9723	34.8182
Arsi	ENSMUSG00000036412	9	0.720866	119.291	137.92	94.6104	116.89	79.7174	253.869	228.78	234.238	240.855	141.724	817.313	767.911	619.049	942.656	794.215	987.481	1188.62	1117.05	968.283	1019.92	154.158	207.944	140.995	181.275	181.317
Aspn	ENSMUSG00000021388	9	0.718181	2131.44	1397.56	1803.84	1350.36	1213.71	703.498	539.084	662.579	800.905	732.815	12850.8	12413.3	17811.5	16828.1	9299.89	21118.5	17153.6	14425.1	20835.2	19549.2	215.69	269.359	177.73	148.872	312.189
Bmp3	ENSMUSG00000029335	9	0.596132	157.856	262.425	104.508	86.7611	108.135	160.546	162.797	190.791	123.871	126.54	544.56	437.606	449.086	772.455	406.073	761.212	775.088	757.011	568.448	862.27	70.8593	127.723	103.788	75.2511	119.988
Ccl24	ENSMUSG00000004814	9	0.346751	93.3768	68.9718	76.2149	92.6518	53.559	83.3943	75.0011	75.4309	67.343	80.7903	162.667	174.136	152.653	226.268	93.9327	273.55	135.726	252.471	247.931	243.39	4.49715	3.59837	3.65148	0	8.84964
Ccn3	ENSMUSG00000037362	9	0.393361	339.766	214.542	222.567	330.342	166	669.592	596.156	477.082	710.911	670.769	1092.79	1130.84	960.677	1289.77	1347.24	2073.94	1872.65	1287.99	1891.81	1900.85	38.0965	26.4656	24.9379	18.6607	39.8498
Cd200	ENSMUSG00000022661	9	0.376302	359.668	262.068	227.844	142.115	250.959	446.71	346.981	358.464	410.656	303.598	614.431	569.227	543.501	337.918	448.136	458.396	345.087	550.776	677.023	433.817	248.051	451.073	352.802	302.809	280.675
Cd248	ENSMUSG00000056481	9	0.33936	2299.55	1821.57	1711.52	1666.11	1141.37	2336.92	2312.48	2978.17	2292.79	1811.6	3733.69	3670.11	3797.89	4586.74	4074.01	2906.21	3560.91	4276.08	2798.05	4364.95	2415.14	2753.36	2654.92	2908.4	2397.96
Cfh	ENSMUSG00000026365	9	0.645385	412.576	470.852	365.491	482.881	419.56	555.626	563.135	497.792	447.437	474.932	1557.6	1442.22	1444.27	1538.6	947.247	1761.21	1472.07	1455.48	1561.11	1820.79	144.258	173.99	139.684	143.88	201.259
Cfp	ENSMUSG00000001128	9	0.661393	103.347	78.259	85.0564	100.276	146.214	139.083	97.1197	143.213	110.683	123.25	260.781	247.336	296.015	235.456	238.94	236.923	278.722	267.604	322.473	314.008	94.2105	183.466	161.366	150.123	104.547
Cgref1	ENSMUSG00000029161	9	0.411508	379.019	270.484	351.687	320.546	372.827	283.243	305.426	390.031	239.166	280.158	654.416	478.66	676.259	787.913	549.123	413.932	544.952	696.5	560.488	607.847	370.027	189.553	343.438	449.764	413.237
Cma1	ENSMUSG00000022225	9	0.853148	824.73	737.994	712.833	818.363	476.013	1003.51	637.368	635.235	674.582	546.173	16030.6	14955.8	17956.1	17644.3	14452.8	13991.3	13665.7	16880.2	15848.9	31908.3	0	2.83312	0.976898	0	0
Col15a1	ENSMUSG00000028339	9	0.777858	2057.26	2051.04	2871.72	2623.49	2750.07	4132.03	3042.22	2295.6	2965.08	2339.47	8817.82	5813.04	5859.81	5810.19	6264.68	8168.4	8820.72	8368.21	7483.86	7405.25	1843.7	1163.96	1910.81	3395.91	2324.47
Col18a1	ENSMUSG00000001435	9	0.285324	4763.91	3700.67	4761.74	3294.22	3628.53	4895.46	5629.17	5642.42	4539.06	3918.93	6679.77	4025.97	6103.56	5707.09	4930.47	6572.52	6817.68	8148.14	6154.56	6088.49	4094.94	2669.15	3096.62	3582.83	2827.45
Col4a2	ENSMUSG00000031503	9	0.850566	7532.52	7536.36	7532.25	7207.83	8190.3	7983.56	8725.15	7515.49	8034.44	6070.32	18384.3	14296	13419.1	11642.8	14146.4	14309.3	16217.9	17923	14207.1	13114	7640.67	6896.57	7701.44	8147.42	6245.65
Cpa3	ENSMUSG00000001865	9	0.831205	3114.66	2796.61	2280.95	2985.73	2320.76	4770.83	3125.15	3371.06	4530.09	3898.92	19476	20599	25326.2	24837.1	17536.2	20823.9	19396.3	24185.4	23313.6	45423.6	11.5108	26.4501	24.9233	21.3141	19.9133
Crip2	ENSMUSG00000006356	9	0.40348	556.785	381.113	553.864	364.441	414.142	503.78	495.425	493.917	433.853	348.952	827.675	888.416	878.216	829.63	811.399	1288.74	1242.03	1309.5	1177.86	1006.11	326.723	279.34	253.795	342.235	265.517
Crtap	ENSMUSG00000032431	9	0.495926	1556.93	1600.41	1543.19	1262.85	1197.46	1721.12	1434.47	1452.47	1504.99	1574.89	2075.88	2143.24	2766.61	2572.72	1974.19	2065.93	1857.47	2618.15	2415.56	2589.47	941.184	1611.9	1309.31	1062.12	1245.13
Csf1	ENSMUSG00000014599	9	0.581613	483.773	437.443	398.037	336.7	286.802	461.664	474.668	727.441	462.587	413.948	1077.41	1156.16	1172.4	1151.58	910.496	975.149	1217.19	1196.03	834.574	1396.11	249.02	268.906	275.602	283.781	261.058
Ctsd	ENSMUSG00000007891	9	0.745282	4230.47	4916.87	4509.52	4484.17	3958.65	5836.93	5295.1	4736.95	4986.72	4897.46	7971.63	8239.56	8398.69	8471.41	8392.21	8392.94	7937.96	7790.14	8143.28	9454.34	4466.73	5417.33	4842.44	4199.1	4824.79
Dll4	ENSMUSG00000027314	9	0.287579	179.681	221.322	187.302	210.045	209.315	202.477	214.402	192.737	157.572	134.706	350.78	300.221	304.417	252.564	435.852	235.354	390.018	292.742	221.278	261.778	196.832	203.515	183.028	159.737	177.622
Dpep1	ENSMUSG00000019278	9	0.413149	11.6155	4.46361	17.5758	4.26339	10.6145	59.8164	16.7234	21.6552	22.1594	22.1536	260.941	169.214	551.332	481.636	289.461	359.415	297.143	279.113	201.364	197.884	44.4939	26.9592	17.7017	23.1087	32.9954
Dpt	ENSMUSG00000026574	9	0.374118	339.766	182.872	395.502	201.593	156.621	3017.6	1717.27	1678.87	1409.39	1135.55	16429.4	17420.4	20116.1	19722.6	16371.7	12477.4	11278.5	12557.9	13964.8	16356.3	116.061	186.204	92.0783	65.7568	99.6246
Emilin2	ENSMUSG00000024053	9	0.63894	1071.25	781.62	1314.71	864.137	540.139	1641.89	1753.89	2730.19	1568.19	1339.08	2737.52	2707.01	3317.34	5233.12	3863.16	3406.24	3241.91	4283.1	3957.2	4569.06	1370.91	1695.95	1570.65	1430.81	1013.87
Entpd1	ENSMUSG00000048120	9	0.554699	703.204	771.254	562.851	354.088	718.036	526.89	757.576	442.755	1308.44	967.901	848.799	1623.1	2423.68	1287.28	1672.27	1673.93	834.537	916.544	1823.14	2235.37	781.47	476.189	1037.76	927.364	862.625
F13a1	ENSMUSG00000039109	9	0.505676	2618.4	3173.62	2654.49	2794.91	2353.17	2909.18	3027.34	2660.31	2584.26	2920.95	8140.36	8309.72	8632.37	10082.4	6673.67	11253.7	9778.9	10070.4	9561.2	11156.6	114.151	160.423	117.731	109.362	185.585
Fbn1	ENSMUSG00000027204	9	0.257931	9573.54	9418.09	9389.38	9947.67	9703.72	11396.3	14394.9	11724.3	11657.8	10192.7	31520	26097.4	27372.1	29120	29453.1	31943.8	36760.2	36897.9	31204.9	39863.9	21331.9	25339.1	24617.1	26300.1	25774.2
Fgl2	ENSMUSG00000039899	9	0.682647	171.481	184.915	123.304	186.347	130.361	300.43	316.115	286.823	287.472	291.371	835.527	759.499	1204.18	1137.69	573.207	1297.9	723.683	1064.05	954.043	1056.49	24.807	36.8628	36.4477	29.324	56.786
Frem2	ENSMUSG00000037016	9	0.753913	175.594	119.626	210.013	118.467	154.048	110.879	250.194	226.373	221.998	184.449	430.309	265.231	167.224	467.09	472.78	531.845	611.9	449.98	364.267	131.882	350.041	40.7351	114.65	99.7142	72.9085
Fst	ENSMUSG00000021765	9	0.498428	662.209	344.313	663.972	347.206	495.235	311.113	295.793	474.256	364.26	362.209	1439.97	1201.49	1220.89	1364.68	1062.46	1298.3	1839.29	1875.96	1605.29	2318.56	275.396	332.111	154.912	267.399	406.801
Gja4	ENSMUSG00000050234	9	0.294349	116.096	79.6872	96.9369	83.8559	92.8473	246.108	217.388	154.884	158.498	184.858	431.423	408.591	427.641	366.846	467.245	388.019	310.291	343.199	378.363	370.974	255.158	258.039	290.622	248.809	192.275
Gusb	ENSMUSG00000025534	9	0.611444	583.498	832.261	670.64	716.675	631.124	694.681	714.96	687.237	709.741	660.626	1190.79	1357.27	1270.66	1238.93	1175.83	1271.42	1452.01	1524.73	1295.07	1452.48	888.361	889.135	706.956	716.498	811.124
H2-D1	ENSMUSG00000073411	9	0.664478	356.948	321.829	400.806	364.904	307.875	607.1	377.015	401.552	398.924	397.361	1168.73	1084.38	1183.17	1183.62	1098.39	1137.2	1165.19	1159.88	1124.24	1504.25	138.596	241.253	185.928	145.534	237.141
Has2	ENSMUSG00000022367	9	0.389376	2669.13	3349.93	3046.14	3266.99	3622.92	2426.72	2599.16	2063.21	2595.8	2749.1	4729.72	4766.1	4357.57	4199	4201.16	3935.3	4203.31	6624.14	4767.16	8309.81	1834.83	3100.25	1899.12	1659.03	2767.57
Hdc	ENSMUSG00000027360	9	0.458043	652.34	500.98	428.113	629.225	363.813	787.49	553.397	406.594	611.034	438.314	7229.01	6855.17	9442.37	6268.48	6130.86	5248.94	4732.74	5145.37	4884.37	9385.21	8.28356	9.35389	6.99055	52.6466	8.82808
Hpse	ENSMUSG00000035273	9	0.317814	39.1667	39.599	50.8685	65.6628	40.0801	174.083	139.633	149.754	131.473	158.352	248.187	177.96	207.957	336.376	245.728	253.738	174.391	258.969	164.408	305.343	140.744	141.235	131.55	106.861	133.668
Hspg2	ENSMUSG00000028763	9	0.260839	4300.87	3937.86	4371.94	5907.47	3215.49	4465.33	4063.91	3531.14	4159.29	2835.26	12690.4	10520.5	10644.9	11234	10632.5	9269.42	13105.2	7132.16	6391.52	7113.15	6625.55	3705.43	5260.27	9037.9	6674.66
Htra3	ENSMUSG00000029096	9	0.827683	57.1755	49.3802	51.7628	52.5804	46.6461	152.505	92.1847	82.0375	77.7563	74.5029	1355.6	1326.29	1308.86	1486.84	1173.59	2076.1	1943.54	1272.73	1315.91	1918.97	38.5804	67.8916	48.2948	87.1995	44.4945
Igfbp6	ENSMUSG00000023046	9	0.528505	26.6274	14.3028	23.2648	17.7876	17.8192	238.348	142.394	185.479	184.138	125.879	659.087	574.431	517.288	799.865	534.859	1132.57	842.644	809.632	857.418	724.182	149.728	246.697	169.769	179.498	205.227
Igfbp7	ENSMUSG00000036256	9	0.414792	271.739	169.916	195.226	188.137	182.975	302.801	213.7	231.488	183.454	219.3	2344.02	2232.77	2508.7	2093.02	1904.64	1918.74	1798.89	2548.98	2040.33	2477.36	702.929	1216.82	914.689	983.86	846.245
Igip	ENSMUSG00000110185	9	0.252076	61.7757	69.4709	49.6317	132.137	90.0338	96.4479	114.864	80.3103	103.335	102.112	270.92	255.97	222.906	212.446	217.98	208.068	272.62	200.089	201.387	228.854	166.561	142.725	190.871	212.377	201.242
Irak4	ENSMUSG00000059883	9	0.685081	126.486	90.1362	132.749	120.676	128.984	106.911	121.159	147.324	138.809	113.879	222.722	284.538	214.201	255.392	276.852	201.943	276.831	235.107	273.388	258.879	124.028	143.352	151.004	126.079	119.357
Jag1	ENSMUSG00000027276	9	0.572989	571.361	730.765	638.402	794.455	756.9	949.688	909.002	1095.37	847.272	701.322	1820.83	1782.07	1787.43	1543.83	1561.09	2298.54	2360.22	2264.6	1902.93	2221.06	832.494	855.254	943.278	816.894	804.264
Jag2	ENSMUSG00000002799	9	0.301327	391.228	190.989	335.122	141.902	223.234	290.791	152.882	421.344	105.871	145.001	769.843	443.574	339.521	539.638	564.994	174.725	599.454	500.697	436.528	439.053	139.15	313.372	303.229	278.166	204.991
Jam2	ENSMUSG00000053062	9	0.886434	265.2	250.889	201.204	182.249	211.485	243.338	229.924	283.472	268.147	203.082	719.762	633.035	932.319	716.29	813.159	808.519	983.61	787.682	791.25	793.848	251.402	148.367	178.386	171.22	266.122
Krt1	ENSMUSG00000046834	9	0.372538	12.2446	6.81733	8.95515	4.0373	11.2021	4.22723	3.1943	6.82001	4.99591	6.40931	449.356	22.5709	93.7121	97.8798	1612.46	1582.15	16.5118	22.3819	12.6052	9.08442	21.546	2.70313	0.914342	0	0
Lamc1	ENSMUSG00000026478	9	0.531505	6121.83	5153.86	4383.07	5044.26	5226.17	6336.65	5701.93	5965.71	4986.96	5060.28	9945.88	9208.44	9085.59	7671.59	8829.51	9500.19	12939	12044.3	8823.38	9512.73	6945.11	5074.74	5815.82	7169.17	5939.35
Lat2	ENSMUSG00000040751	9	0.734328	42.7408	51.1558	69.0606	49.2937	48.6591	112.103	80.8552	51.7119	48.4078	61.9791	241.409	225.465	338.995	302.911	208.259	199.461	193.834	262.993	289.742	378.126	42.3505	42.0534	21.4466	20.7496	35.1112
Lgals3bp	ENSMUSG00000033880	9	0.361161	216.623	177.433	178.802	171.192	287.591	193.024	165.901	209.065	215.481	267.402	390.066	286.806	408.745	482.7	523.801	519.971	458.259	899.949	656.05	652.058	85.7647	113.227	114.569	95.4422	108.238
Lgals9	ENSMUSG00000001123	9	0.475741	477.371	491.967	480.47	384.089	415.832	524.72	523.202	491.468	527.455	603.366	1028.67	1043.8	1193.2	1019.49	1113.29	1151.59	1274.86	1194.35	1209.33	1505.06	173.327	210.263	180.587	163.254	260.199
Loxl1	ENSMUSG00000032334	9	0.699049	920.244	1103.36	877.86	824.16	604.914	779.343	562.931	779.201	582.714	501.756	2479.26	2532.06	2907.47	3069.44	2317.05	2779.12	3616.43	3769.89	2743.13	3416.09	470.447	449.915	421.066	593.588	469.232
Man2b2	ENSMUSG00000029119	9	0.672073	238.511	158.47	170.473	199.095	140.12	209.551	181.965	279.026	223.516	195.02	585.481	500.898	624.165	710.252	526.021	473.066	676.609	549.791	528.1	684.176	108.613	127.959	175.19	127.688	132.727
Matn2	ENSMUSG00000022324	9	0.203027	818.671	765.42	909.181	912.571	852.109	2335.15	2055.76	1743.58	1714.37	1786.75	4716.98	4865.75	5360.36	4848.7	4708.47	4222.54	4743.25	4033.93	4421.19	4169.37	3324.09	4742.17	4116.69	4120.94	3519.93
Metrnl	ENSMUSG00000039208	9	0.537921	158.054	102.575	79.4445	125.196	74.2863	98.1977	94.7011	76.947	73.6417	89.2908	244.491	190.846	213.574	267.559	232.283	287.789	287.73	252.776	278.476	290.053	31.1776	61.7466	44.8821	40.9228	69.8926
Mfge8	ENSMUSG00000030605	9	0.311296	957.638	859.654	1088.8	833.308	738.27	934.407	979.998	814.279	987.125	978.354	1842.35	2061.29	2231.87	2117.17	2516.93	1821.07	2029.57	2103.29	1720.23	1926.28	1336.57	1507.34	1459.55	1582.88	1309.79
Mmrn2	ENSMUSG00000041445	9	0.607652	659.031	548.707	692.223	618.655	586.217	730.755	453.227	627.953	543.237	469.858	819.518	768.428	1225.71	608.286	1153.94	576.115	805.633	1194.86	1245.5	1218.62	536.972	422.079	577.644	535.364	500.77
Olfml2b	ENSMUSG00000038463	9	0.318138	1131.13	1236.17	1105.08	1135.87	929.411	614.162	509.77	840.39	703.919	582.742	1737.08	1570.67	2015.85	1801.73	1596.5	1705.04	1951.96	1918.74	1498.19	2503.81	495.254	353.504	421.066	358.997	363.63
Pcolce2	ENSMUSG00000015354	9	0.578023	31.5698	43.2686	75.6854	35.9385	15.0883	34.7313	28.5681	24.7098	36.0012	32.8715	172.421	242.986	230.539	203.062	307.886	226.892	205.466	552.515	124.781	619.681	20.1443	18.3537	22.9507	10.1009	13.3285
Pecam1	ENSMUSG00000020717	9	0.308571	3847.5	3863.48	3818.1	3530.45	4036.99	4842.37	4775.1	4223.5	3749.33	4198.49	6067.33	5143.09	6037.87	4588.06	5967.64	6081.95	5772.98	8478.49	7004.13	7877.36	2692.49	2505.72	2768.15	2172.09	2331.6
Pi15	ENSMUSG00000067780	9	0.426871	162.96	83.7737	164.405	71.9975	137.864	238.348	173.721	318.373	152.283	132.041	4449.69	3760.24	3732.47	3726.51	3055.76	2533.94	2933.39	2467.32	2530.55	4732.79	667.131	867.693	864.193	707.33	940.456
Plac9a	ENSMUSG00000095304	9	0.531038	83.1412	81.4551	1.73515	0	39.7708	289.616	122.429	130.875	163.238	102.573	449.436	388.577	404.3	240.34	63.9718	405.885	287.107	524.677	407.06	261.108	41.094	96.992	55.9972	62.4655	85.656
Podxl	ENSMUSG00000025608	9	0.257788	705.309	651.279	669.739	928.32	618.922	1161.45	906.565	844.25	568.975	805.049	1851.33	1713.45	1502.72	1632.06	1676.8	1283.32	1476.79	1490.44	1305.43	1603.34	950.576	982.423	1172.9	1975.61	945.892
Pon3	ENSMUSG00000029759	9	0.447858	102.756	113.233	110.836	100.332	119.832	209.421	97.2415	137.983	141.776	159.223	317.486	323.327	383.608	271.641	356.801	329.183	236.701	331.46	256.987	319.867	120.014	105.884	99.1745	104.521	89.2614
Postn	ENSMUSG00000027750	9	0.558937	26166	50365.8	16137.4	19189	15028.7	43805.4	36528.6	40743.5	31289.8	32012.2	148148	155753	148185	132694	164560	127021	143027	133978	125269	145969	21067.4	16695.7	17428.9	15499	25160.4
Pros1	ENSMUSG00000022912	9	0.540618	1251.65	1505.28	1360.05	1304.44	1379.66	1784.6	1777.42	1543.07	1629.45	1918.09	3373.86	3470.21	3683.88	3081.49	3249.5	3719.09	3289.44	3966.46	3398.25	4021.49	1951.11	2510.93	1971	1710.22	2105.9
Psen2	ENSMUSG00000010609	9	0.388806	175.117	191.542	196.777	154.961	184.778	275.1	330.138	275.512	206.928	152.324	358.409	312.817	502.817	778.373	427.002	386.02	354.799	439.556	483.628	775.035	350.259	536.69	214.292	274.074	242.502
Ptgs1	ENSMUSG00000047250	9	0.786319	375.673	184.43	142.518	150.329	135.509	204.854	200.323	315.026	151.078	200.043	417.353	350.235	469.315	488.124	447.124	442.029	435.333	567.731	441.683	592.616	237.263	290.562	191.12	177.446	212.118
Qpct	ENSMUSG00000024084	9	0.642775	103.277	162.218	153.929	172.928	151.276	167.773	142.795	178.661	176.647	184.616	638.687	578.655	757.6	731.543	637.374	834.575	702.056	460.069	654.847	563.935	87.2569	70.5965	100.663	84.9736	102.035
Rarres2	ENSMUSG00000009281	9	0.421421	88.6717	92.4435	51.3662	81.555	46.3595	407.489	303.618	271.553	289.255	225.104	1232.19	1212.97	1326.54	1505.36	1287.6	1705.16	1240.26	1837.21	1638.41	1740.36	534.033	948.375	636.695	466.522	684.135
Reg2	ENSMUSG00000023140	9	0.401819	755.15	345.312	1008.13	418.434	651.809	573.146	620.84	948.417	585.047	363.555	1077.99	885.685	975.218	1728.56	654.945	632.08	844.623	1136.93	1058.8	1274.9	682.195	500.012	1055.07	694.892	751.172
Reln	ENSMUSG00000042453	9	0.434756	279.998	285.081	405.036	193.931	278.203	279.709	271.657	701.04	260.216	390.73	805.073	588.856	1234.95	1840.86	261.046	605.576	686.475	781.54	897.206	1223.51	318.451	141.223	391.777	122.946	216.993
Rnase4	ENSMUSG00000021876	9	0.397145	993.725	1209.52	802.2	917.361	680.307	1758.78	1344.79	1482.66	1342.88	1490.21	3155.97	3182.77	4119.73	4296.34	3335.58	3209.63	3073.86	2969.43	2917.32	2949.25	1055.83	1887.1	1280.09	1219.76	1594.16
S100a1	ENSMUSG00000044080	9	0.643732	68.5121	43.8473	52.6342	46.0359	37.4433	131.674	98.0432	144.859	103.465	83.4684	264.648	218.898	258.761	286.837	218.577	511.893	210.037	328.004	337.042	255.496	51.2891	85.8509	60.3125	53.2158	35.7972
S100a10	ENSMUSG00000041959	9	0.68586	3012.74	4693.64	3100.66	3870.97	3325.1	4886.49	3836.79	3629.82	4802.15	4980.88	5647.33	5902.55	6472.46	8058.42	6781.14	8471.28	6402.76	7320.12	7866.29	7642.92	3284.69	5594.17	3542.49	3105.6	4836.72
S100a13	ENSMUSG00000042312	9	0.440225	262.014	265.624	283.831	212.604	221.333	472.262	427.182	396.771	438.978	397.884	1041.56	848.428	1164.2	919.438	757.885	830.024	557.136	1036.22	963.197	1015.74	186.939	295.847	212.931	152.84	212.2
Scpep1	ENSMUSG00000000278	9	0.903674	1129	1447.65	1184.96	1258.69	1202.33	1369.12	1386.92	1144.42	1350.34	1342.42	1659.67	1794.2	1691.18	1784.31	1904.3	1977.21	1873.64	1734.55	1671.1	1968.77	1207.57	1434.81	1252.65	1076.1	1177.56
Selenop	ENSMUSG00000064373	9	0.404026	4283.55	4626.49	3633.61	3893.34	3437.68	5421.17	4623.96	5502.8	4662.67	4982.91	11867.5	11287.8	11531.3	13190.4	8587.18	14176.8	13092.1	12302.1	12557.3	13993.4	6782.22	7872.67	7567.56	7141.34	8227.12
Sema3b	ENSMUSG00000057969	9	0.535682	54.9806	82.4261	85.0846	84.6604	98.9747	56.8696	154.22	123.354	108.131	81.8869	711.902	582.915	409.696	373.727	157.21	358.292	757.962	404.744	252.684	184.895	96.7184	54.5479	133.959	22.8217	99.6063
Sema3c	ENSMUSG00000028780	9	0.548257	3489.84	3911.89	3854.28	3953.37	3220.17	3233.28	2647.54	2104.46	2439.03	2410.04	9234.93	8930.47	9416.56	10554.2	9518	12395	11756.2	9274.35	8851.44	9550.95	1150.67	1707.58	1073.32	1192.75	1701.31
Sema3g	ENSMUSG00000021904	9	0.328329	280.121	286.057	362.156	287.99	342.316	452.307	488.886	344.187	445.971	388.201	610.139	514.344	640.855	575.81	548.987	645.574	612.652	968.643	843.179	1089.93	221.491	249.532	222.523	213.265	120.546
Sema7a	ENSMUSG00000038264	9	0.352185	48.9945	49.0383	45.7542	39.8104	36.5762	77.6017	79.7406	83.1786	69.1488	80.9852	260.675	257.172	262.884	172.975	294.677	188.949	221.07	198.764	196.301	193.324	93.0263	91.6843	95.9149	138.622	87.6696
Serping1	ENSMUSG00000023224	9	0.400182	321.962	304.683	217.286	243.084	177.137	471.531	511.719	662.699	480.059	437.599	789.955	741.68	788.327	832.745	775.678	893.423	824.412	717.326	803.694	706.723	386.459	501.562	403.132	389.98	417.949
Sfrp4	ENSMUSG00000021319	9	0.258057	25.9238	32.1904	17.4578	37.3882	11.706	85.4594	59.6738	115.358	53.3822	45.5939	304.173	267.681	288.481	286.46	210.411	260.579	282.176	122.285	328.479	363.433	156.796	206.745	312.305	139.349	170.261
Siglec1	ENSMUSG00000027322	9	0.84716	67.9387	50.5647	71.9193	63.2059	53.6151	64.1402	71.6369	75.9592	73.8992	63.4788	211.876	212.958	226.333	207.756	211.679	184.586	290.516	255.905	208.182	307.045	31.5689	41.1202	40.229	48.4944	39.566
Spn	ENSMUSG00000051457	9	0.416013	85.2711	70.9752	68.196	88.3175	64.6079	116.734	79.5875	97.952	109.856	80.0565	230.304	157.95	229.401	211.628	142.643	178.694	161.01	252.471	209.237	417.273	5.82231	16.6153	21.6112	20.8559	29.3573
Spon2	ENSMUSG00000037379	9	0.664251	33.8597	85.2654	28.0796	25.8486	29.4619	205.311	149.107	115.002	120.164	95.4436	1016.67	1353.69	1155.09	1316.69	1179	1097.56	1174.6	961.714	908.097	1486.6	83.4958	151.457	61.1228	51.0444	99.2541
Srgn	ENSMUSG00000020077	9	0.643899	599.709	427.192	357.222	489.775	406.643	782.052	467.19	573.655	646.031	596.45	1550.28	1847.03	2285.87	2257.37	1690.12	1552.52	1595.79	2080.22	1911.05	3833.74	67.7394	117.861	84.237	53.3084	87.55
Srpx	ENSMUSG00000090084	9	0.74887	1293.07	1257.39	1279.18	1599.64	1070.21	2211.48	1789.2	1561.41	1737.47	1834.35	3283.57	3473.3	3640.94	4235.61	2984.67	4118.26	4072.46	4287.45	3945.09	3916.56	1327.35	2129.19	1635.86	1493.86	1704.43
Tcn2	ENSMUSG00000020432	9	0.43562	622.294	680.281	625.832	626.482	504.076	728.259	751.166	688.999	657.327	594.917	1188.16	1222.45	1377.02	1247.93	1303.79	1122.8	943.303	1271.12	1025.01	1258.23	608.462	751.689	743.69	628.686	642.554
Tfpi2	ENSMUSG00000029664	9	0.83951	34.3073	15.7923	30.7785	16.2108	39.0116	19.5847	41.5363	36.6297	29.7392	26.5665	235.261	298.215	245.041	378	137.425	334.935	363.112	251.34	273.704	388.501	13.6952	22.8083	21.1806	19.6759	28.9898
Tgfb1	ENSMUSG00000002603	9	0.579338	92.3582	182.206	89.5269	138.841	118.718	76.9131	128.385	78.2096	112.45	72.3745	452.688	195.145	274.908	246.514	161.083	84.5982	250.533	623.754	231.923	323.754	35.5709	35.2647	113.533	83.0024	369.672
Thnsl2	ENSMUSG00000054474	9	0.239975	73.1988	84.7586	68.5165	79.5862	57.1841	149.596	98.9912	92.6991	106.61	117.369	185.466	236.64	198.591	211.947	216.17	204.605	193.697	134.065	182.447	151.459	128.048	172.896	148.604	144.253	136.426
Tinagl1	ENSMUSG00000028776	9	0.452405	207.27	150.13	223.267	164.294	162.54	340.653	271.558	292.929	226.545	259.024	634.645	777.783	841.191	548.872	495.652	855.436	785.723	1101.62	930.716	962.331	336.13	343.175	316.997	302.54	282.992
Tnfsf12	ENSMUSG00000097328	9	0.417154	200.495	181.009	144.593	153.108	134.846	198.214	138.252	137.466	153.627	140.449	203.795	178.362	232.62	265.991	271.74	328.415	226.221	261.675	230.212	231.678	138.07	246.378	214.706	150.846	174.663
Vim	ENSMUSG00000026728	9	0.394363	37868.8	32198.7	38302.9	33150	30658.3	29099.1	29059.1	24229.8	28168.6	25972.7	43907.2	44271.2	47516.2	48679.5	41607.9	56304.5	56297.3	54974.1	45734	52897.4	28419.2	25587.8	24326.4	27973.4	24094
Vwa1	ENSMUSG00000042116	9	0.865948	209.824	238.04	245.832	215.993	251.344	229.479	252.512	246.667	268.049	227.111	431.423	370.136	430.064	441.144	472.29	545.476	542.266	523.412	434.303	352.164	243.64	233.464	246.501	226.594	225.152
Wnt2	ENSMUSG00000010797	9	0.266824	34.0831	56.1897	41.1012	38.9634	35.6384	176.267	160.431	200.776	170.93	153.168	356.294	336.487	287.113	427.214	353.209	350.904	300.378	321.998	151.548	356.344	248.956	264.656	132.363	174.167	191.279
