# Supplementary figures and images for: Mesenchyme instructs growth while epithelium directs branching in the mouse mammary gland
Source: eLife journal article supplement (doi:10.7554/elife.93326), 2024-03-05

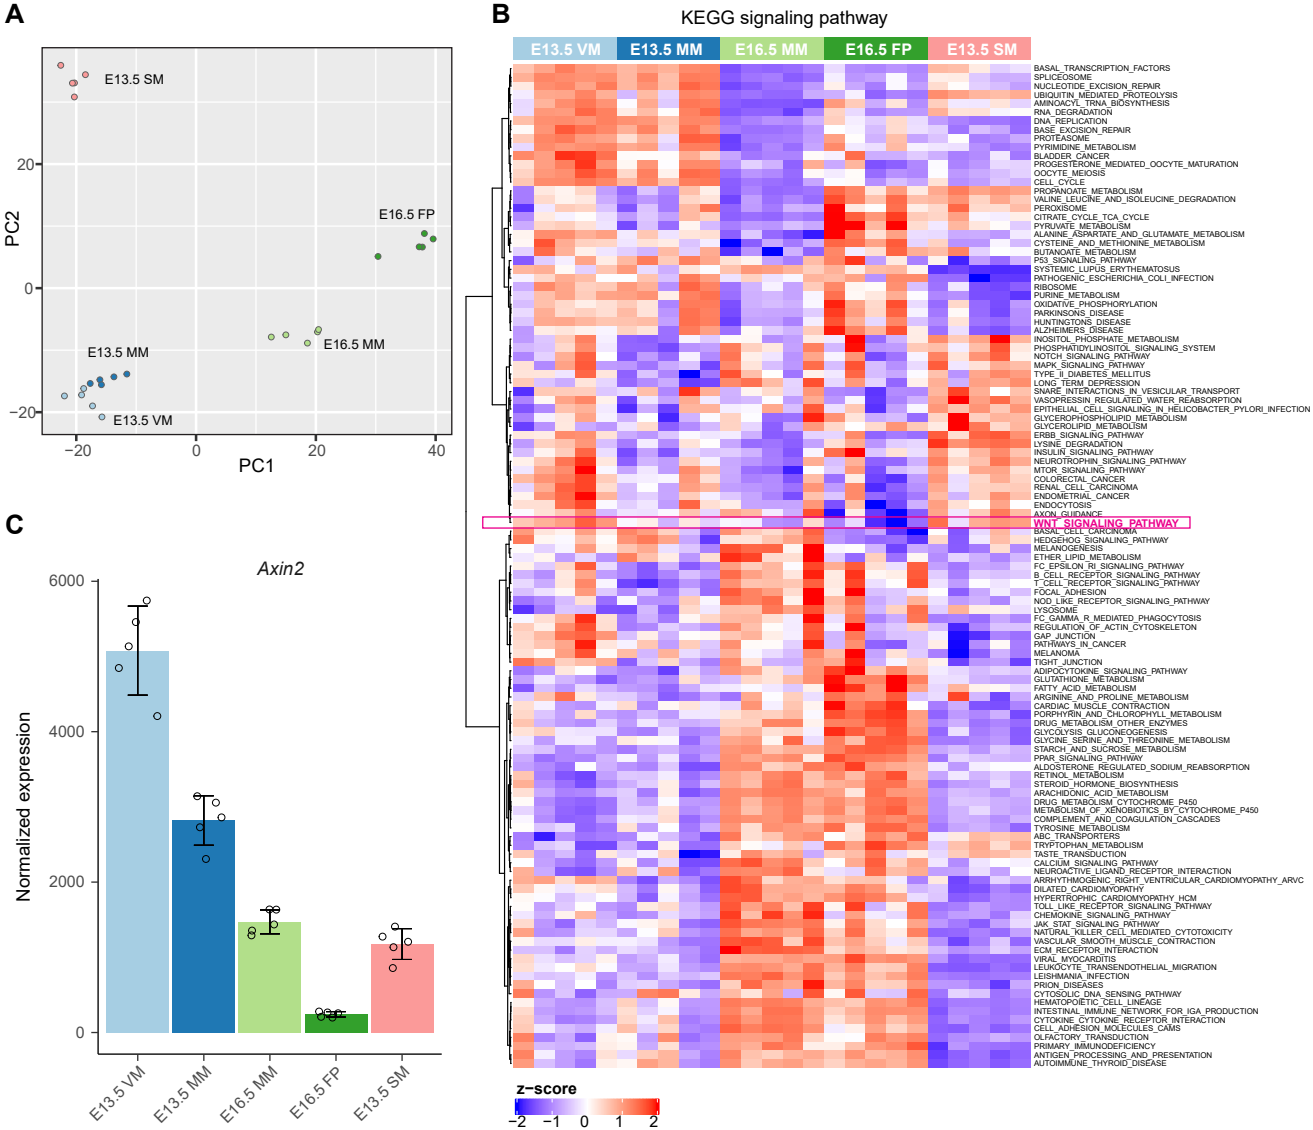

Figure 5—figure supplement 1

Supplement: supp [file elife-93326-supp-v1.zip]

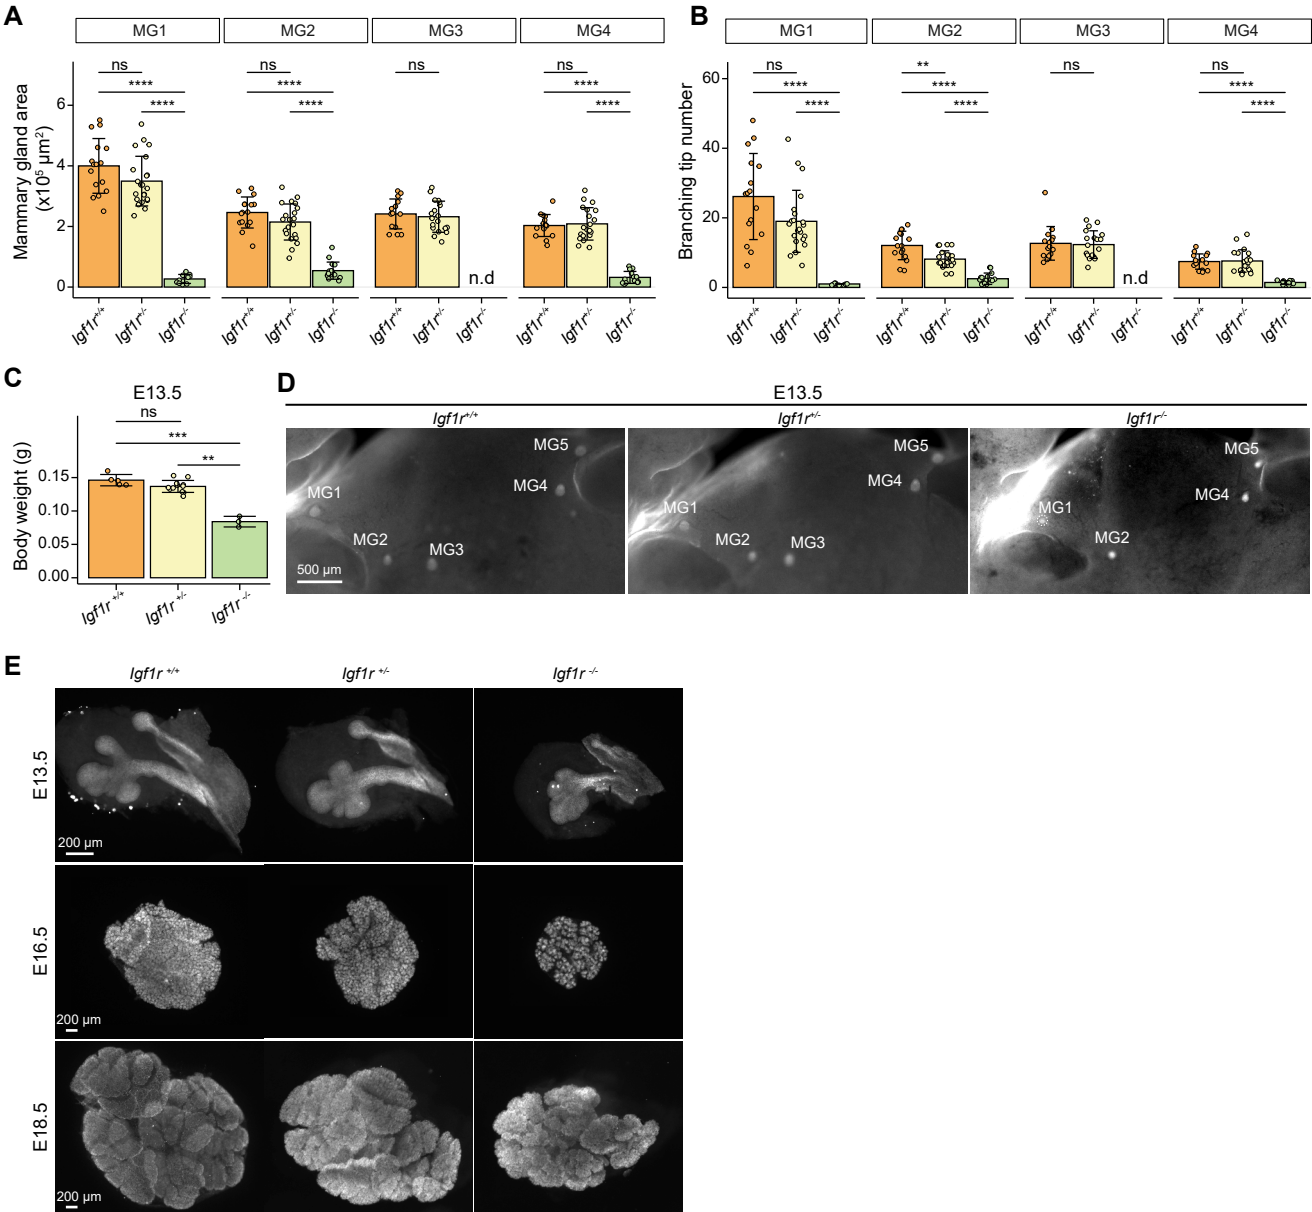

Figure 7—figure supplement 1

Supplement: supp [file elife-93326-supp-v1.zip]

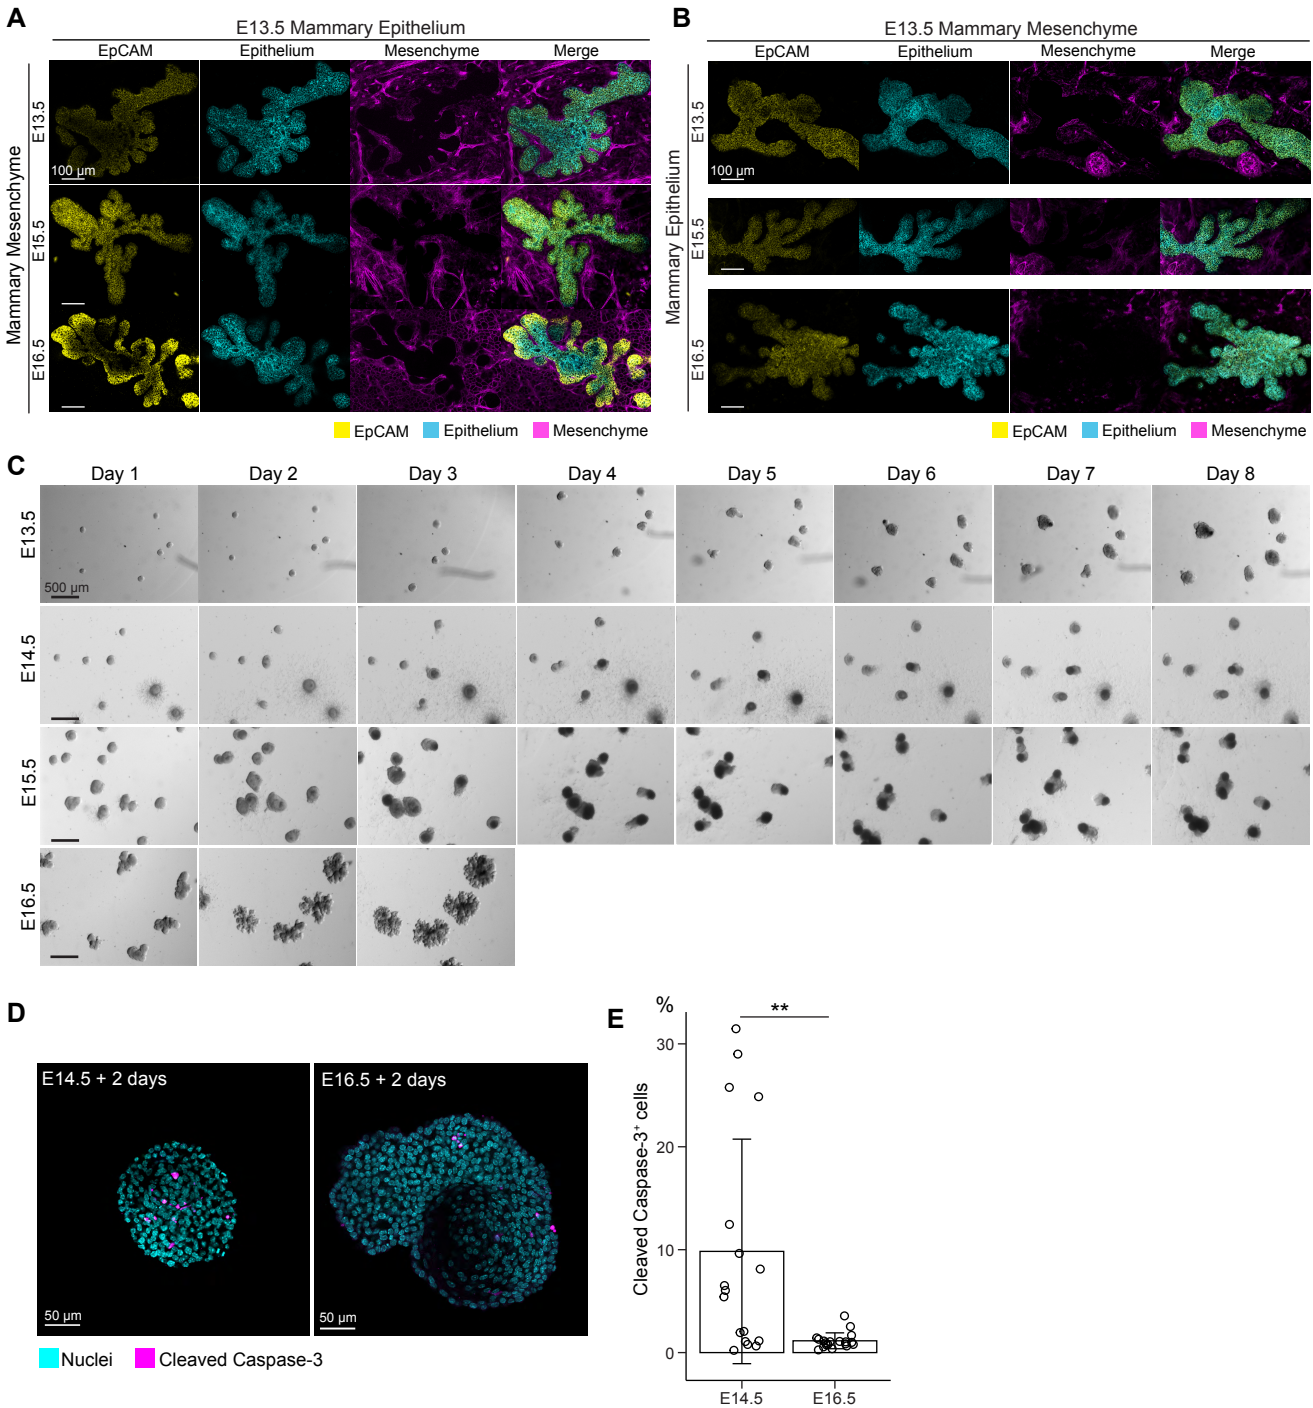

**Figure 1—figure supplement 1**

Supplement: supp [file elife-93326-supp-v1.zip]

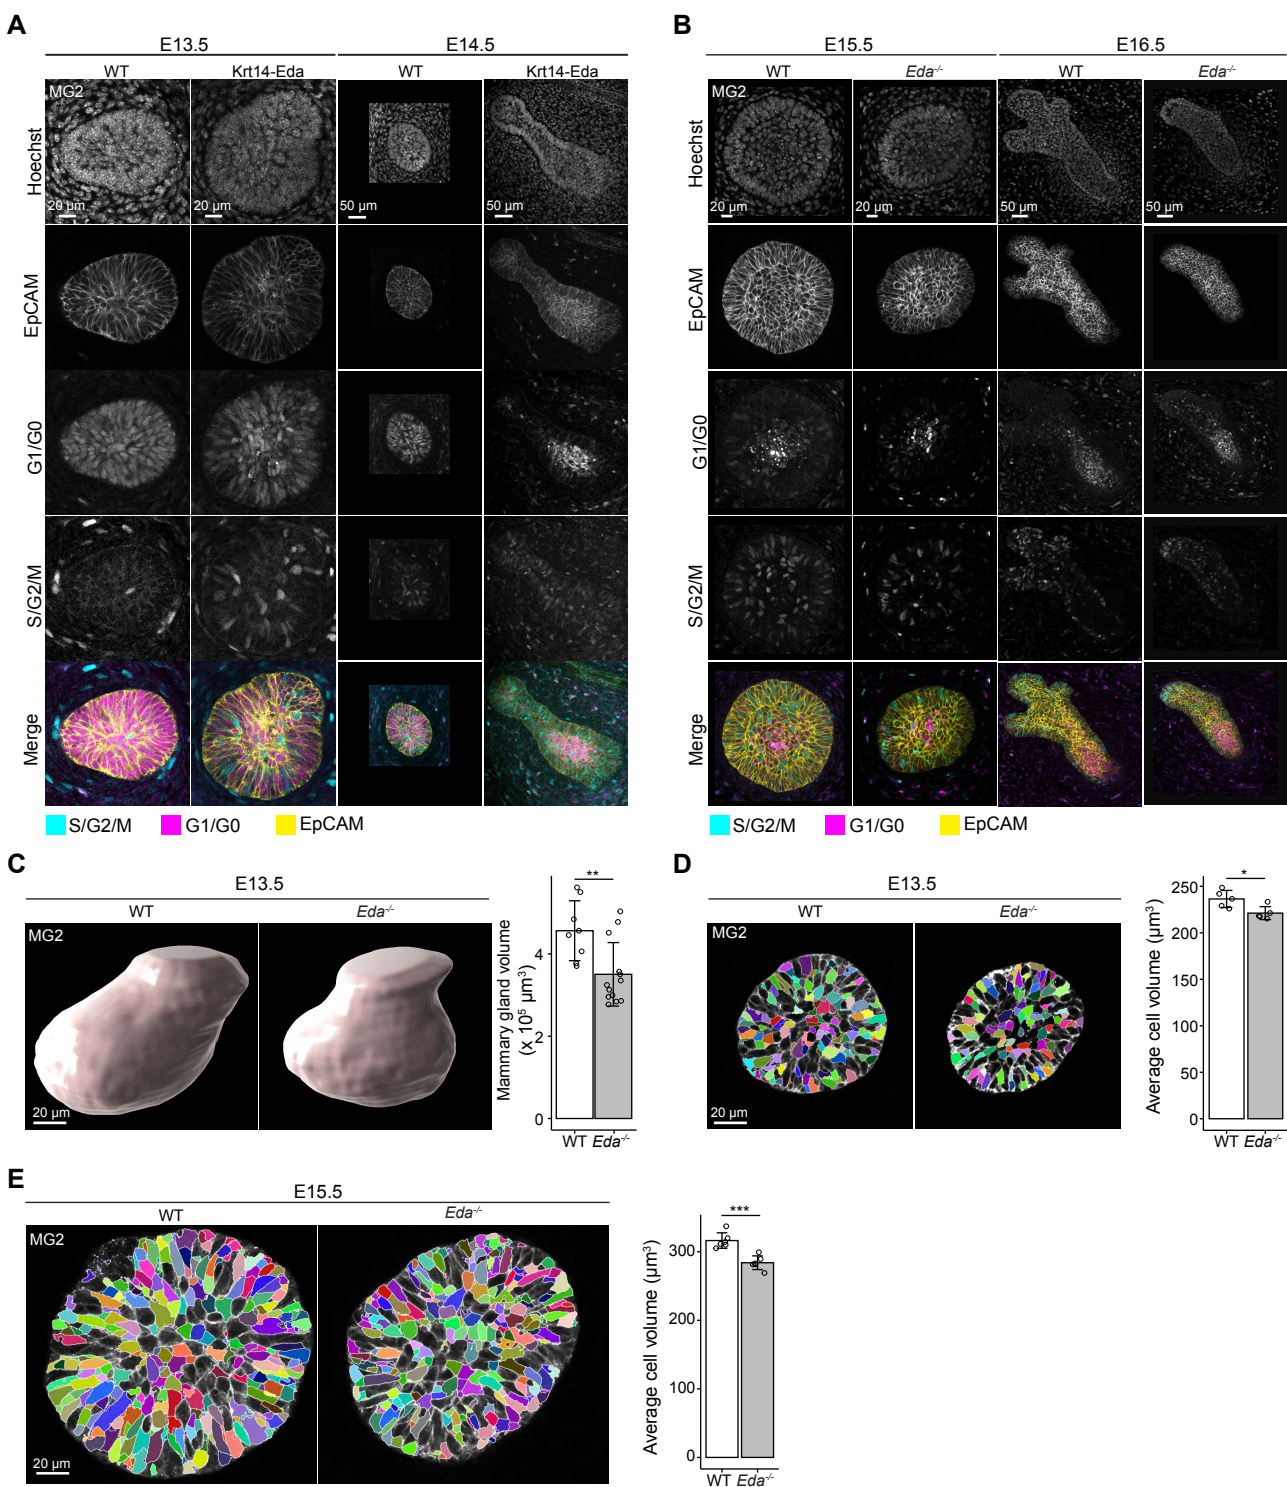

Supplement: supp [file elife-93326-supp-v1.zip]

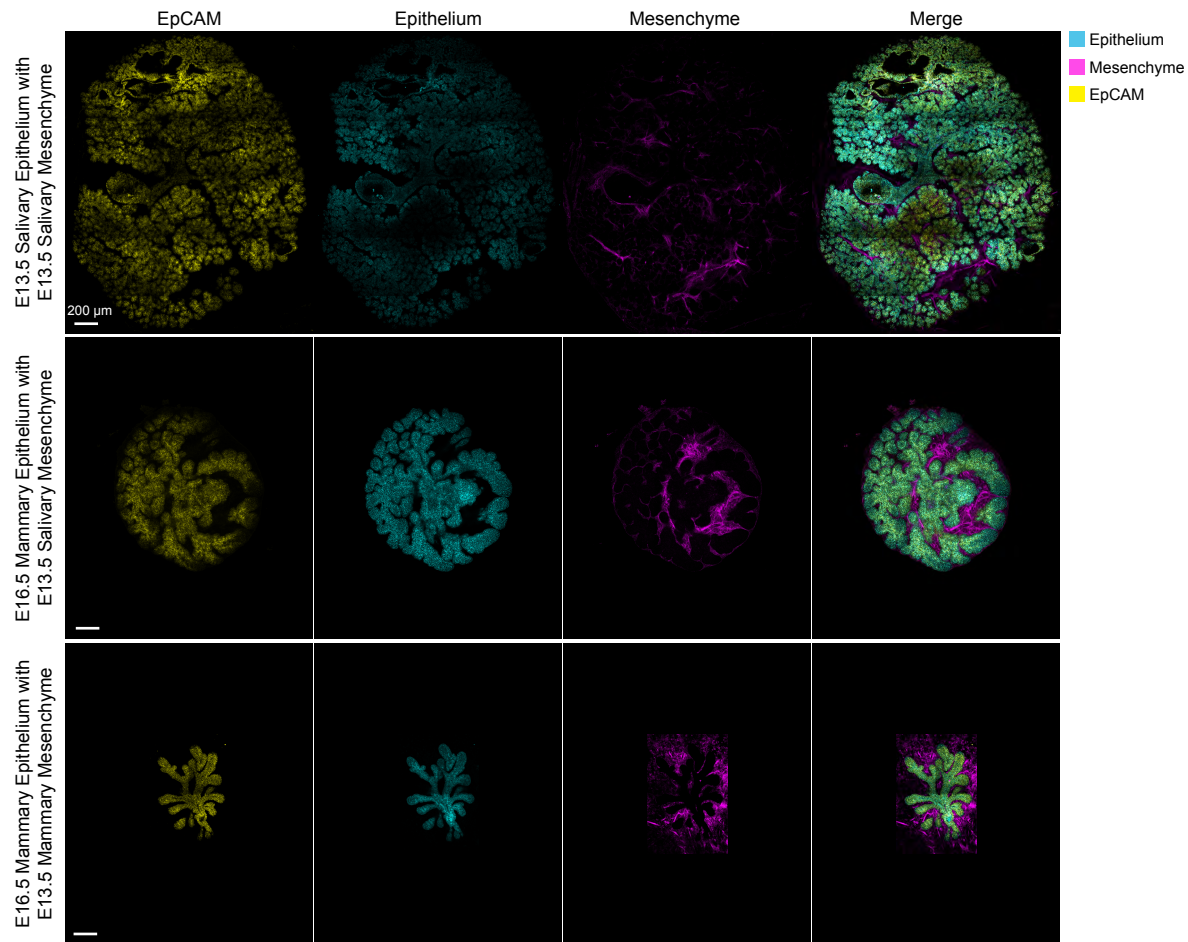

**Figure 4—figure supplement 1**

Supplement: supp [file elife-93326-supp-v1.zip]

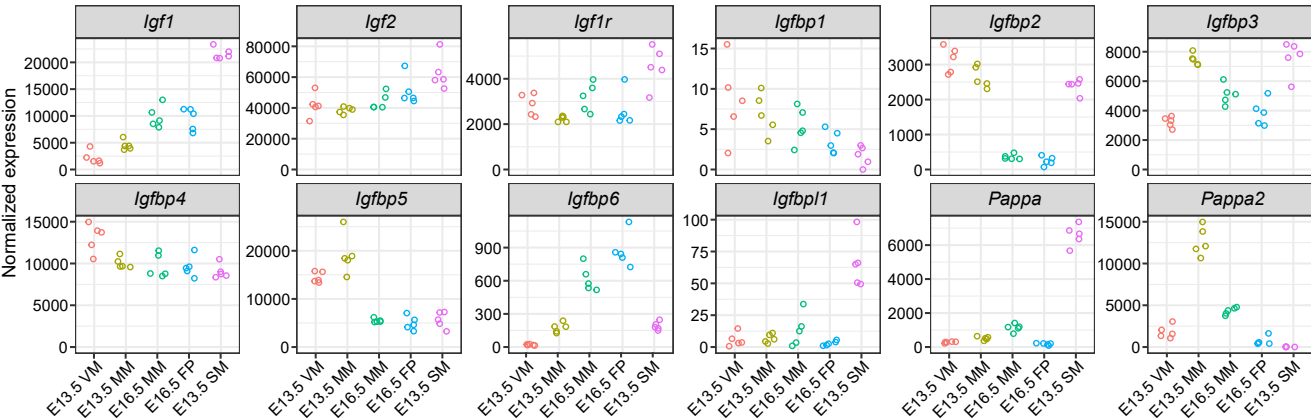

**Figure 6—figure supplement 1**

Supplement: supp [file elife-93326-supp-v1.zip]
